# Supplementary material for: Ionic liquid-assisted extraction of wool keratin proteins as an aid to MS identification
Source: Royal Society of Chemistry journal article supplement (doi:10.1039/c4ay01251h), 2014-01-01
Supplement: c4ay01251h1.pdf [file c4ay01251h1.pdf]

**Supplementary Table 1. Proteins and peptides identified in Urea/thourea extract Fraction 1.**

| Protein  | Accession    | Mol Wgt (kDa) | Protein Score | Range     | m/z meas. | Peptide score | Sequence                             | Modifications                                |
|----------|--------------|---------------|---------------|-----------|-----------|---------------|--------------------------------------|----------------------------------------------|
| K86-like | gi 312283584 | 53.2          | 4558.4        | 476 - 485 | 509.81    | 36.4          | R.VGGSILGCK<br>K.C                   | Carbamidomethyl:<br>8                        |
|          |              |               |               | 408 - 416 | 565.33    | 46.2          | R.RLLEGEEQR.<br>L                    |                                              |
|          |              |               |               | 213 - 221 | 570.35    | 19.1          | K.KDVDCAYLR.<br>K                    | Carbamidomethyl:<br>5                        |
|          |              |               |               | 408 - 417 | 621.85    | 22.8          | R.RLLEGEEQR<br>L.C                   |                                              |
|          |              |               |               | 126 - 135 | 631.38    | 27.8          | R.FLEQQNKLL<br>E.T                   |                                              |
|          |              |               |               | 320 - 324 | 633.35    | 16.5          | K.EEINE.L                            |                                              |
|          |              |               |               | 268 - 290 | 883.14    | 18.6          | R.DLNMDNIVA<br>EIKAHYDDIAS<br>RSR.A  | Deamidated: 3                                |
|          |              |               |               | 409 - 432 | 883.73    | 18.9          | R.LLEGEEQRL<br>CEGVGAVNVC<br>VSSSR.G | Carbamidomethyl:<br>10, 19;<br>Deamidated: 7 |
|          |              |               |               | 34 - 39   | 378.17    | 29            | R.GISCYR.G                           | Carbamidomethyl:<br>4                        |
|          |              |               |               | 117 - 123 | 406.25    | 61.3          | R.FAAFIDK.V                          |                                              |
|          |              |               |               | 40 - 48   | 426.21    | 56.8          | R.GLTGGFGSR<br>.S                    |                                              |
|          |              |               |               | 476 - 484 | 445.75    | 98.3          | R.VGGSILGCK.<br>K                    | Carbamidomethyl:<br>8                        |
|          |              |               |               | 126 - 132 | 453.78    | 35.3          | R.FLEQQNK.L                          |                                              |
|          |              |               |               | 397 - 408 | 473.95    | 67            | K.LGLDIEIATY<br>RR.L                 |                                              |
|          |              |               |               | 242 - 248 | 476.29    | 47.5          | R.LYEEEEIR.V                         |                                              |
|          |              |               |               | 254 - 262 | 481.35    | 33.8          | H.ISDTSVIVK.M                        |                                              |
|          |              |               |               | 409 - 416 | 487.3     | 59.9          | R.LLEGEEQR.L                         |                                              |
|          |              |               |               | 332 - 340 | 487.78    | 48.9          | R.LTAEVENAK.<br>C                    |                                              |
|          |              |               |               | 214 - 221 | 506.27    | 45.7          | K.DVDCAYLR.K                         | Carbamidomethyl:<br>4                        |
|          |              |               |               | 291 - 298 | 506.29    | 57            | R.AEAESWYR.<br>S                     |                                              |
|          |              |               |               | 11 - 24   | 507.94    | 40.4          | P.AFSCVSACG<br>PRPGR.C               | Carbamidomethyl:<br>4, 8                     |
|          |              |               |               | 320 - 327 | 508.79    | 39.4          | K.EEINELNR.V                         |                                              |
|          |              |               |               | 194 - 201 | 511.83    | 64.4          | R.YEEEIALR.A                         |                                              |
|          |              |               |               | 332 - 345 | 531.28    | 40            | R.LTAEVENAK<br>CQNSK.L               | Carbamidomethyl:<br>10                       |
|          |              |               |               | 117 - 125 | 533.84    | 64.3          | R.FAAFIDKVR.<br>F                    |                                              |

|  |  |  |  |           |        |       |                           |                                      |
|--|--|--|--|-----------|--------|-------|---------------------------|--------------------------------------|
|  |  |  |  | 368 - 377 | 536.33 | 87.2  | K.LAGLEEALQ<br>K.A        |                                      |
|  |  |  |  | 423 - 432 | 539.74 | 37.6  | G.AVNVCVSSS<br>R.G        | Carbamidomethyl:<br>5                |
|  |  |  |  | 409 - 417 | 543.84 | 57.4  | R.LLEGEEQRL.<br>C         |                                      |
|  |  |  |  | 241 - 248 | 554.33 | 49.8  | R.RLYEEEEIR.V             |                                      |
|  |  |  |  | 25 - 33   | 556.3  | 57.9  | R.CCITAAPYR.<br>G         | Carbamidomethyl:<br>1, 2             |
|  |  |  |  | 388 - 396 | 564.31 | 40.6  | K.EYQEVMSK<br>.L          |                                      |
|  |  |  |  | 328 - 337 | 579.38 | 47.2  | R.VIQRLTAEVE<br>.N        |                                      |
|  |  |  |  | 318 - 331 | 581.34 | 49.7  | R.TKEEINELNR<br>VIQR.L    |                                      |
|  |  |  |  | 378 - 387 | 589.26 | 63    | K.AKQDMACLL<br>K.E        | Carbamidomethyl:<br>7                |
|  |  |  |  | 417 - 427 | 589.32 | 32.4  | R.LCEGVGAVN<br>VC.V       | Carbamidomethyl:<br>2, 11            |
|  |  |  |  | 193 - 201 | 589.85 | 61.4  | K.RYEEEEIALR.<br>A        |                                      |
|  |  |  |  | 202 - 212 | 596.87 | 76.3  | R.ATAENEFVA<br>LK.K       |                                      |
|  |  |  |  | 8 - 24    | 596.98 | 33.7  | R.AVPAFSCVS<br>ACGPRPGR.C | Carbamidomethyl:<br>7, 11            |
|  |  |  |  | 378 - 387 | 597.34 | 38.8  | K.AKQDMACLL<br>K.E        | Carbamidomethyl:<br>7; Oxidation: 5  |
|  |  |  |  | 165 - 175 | 597.76 | 83    | R.EAECAEADS<br>GR.L       | Carbamidomethyl:<br>4                |
|  |  |  |  | 367 - 377 | 600.41 | 80.9  | C.KLAGLEEAL<br>QK.A       |                                      |
|  |  |  |  | 301 - 310 | 609.89 | 64.6  | K.CEEIKATVIR.<br>H        | Carbamidomethyl:<br>1                |
|  |  |  |  | 291 - 300 | 613.82 | 54.5  | R.AEAESWYRS<br>K.C        |                                      |
|  |  |  |  | 318 - 327 | 623.35 | 61.2  | R.TKEEINELNR<br>.V        |                                      |
|  |  |  |  | 289 - 298 | 627.83 | 69.4  | R.SRAEAESWY<br>R.S        |                                      |
|  |  |  |  | 269 - 279 | 630.4  | 54.9  | D.LNMDNIVAEI<br>K.A       |                                      |
|  |  |  |  | 397 - 407 | 632.41 | 104.3 | K.LGLDIEIATY<br>R.R       |                                      |
|  |  |  |  | 368 - 379 | 635.91 | 73.9  | K.LAGLEEALQ<br>KAK.Q      |                                      |
|  |  |  |  | 202 - 213 | 660.86 | 81.7  | R.ATAENEFVA<br>LKK.D      |                                      |
|  |  |  |  | 366 - 377 | 680.44 | 75.9  | K.CKLAGLEEA<br>LQK.A      | Carbamidomethyl:<br>1                |
|  |  |  |  | 268 - 279 | 687.92 | 96    | R.DLNMDNIVA<br>EIK.A      |                                      |
|  |  |  |  | 268 - 279 | 695.91 | 73.1  | R.DLNMDNIVA<br>EIK.A      | Oxidation: 4                         |
|  |  |  |  | 380 - 396 | 696.7  | 26.6  | K.QDMACLLKE<br>YQEVMSK.L  | Carbamidomethyl:<br>5; Deamidated: 1 |
|  |  |  |  | 268 - 279 | 696.89 | 34.7  | R.DLNMDNIVA<br>EIK.A      | Oxidation: 4;<br>Deamidated: 3, 6    |

|  |  |  |  |           |         |       |                                         |                                             |
|--|--|--|--|-----------|---------|-------|-----------------------------------------|---------------------------------------------|
|  |  |  |  | 92 - 103  | 700.9   | 54.2  | L.NLEIDPNAQC<br>VK.Q                    | Carbamidomethyl:<br>10                      |
|  |  |  |  | 419 - 432 | 710.84  | 75.7  | C.EGVGAVNVC<br>VSSSR.G                  | Carbamidomethyl:<br>9                       |
|  |  |  |  | 328 - 340 | 735.91  | 72.6  | R.VIQRLTAEVE<br>NAK.C                   |                                             |
|  |  |  |  | 126 - 137 | 745.94  | 62.7  | R.FLEQQNKLL<br>ETK.L                    |                                             |
|  |  |  |  | 249 - 262 | 755.48  | 73    | R.VLQAHISDTS<br>VIVK.M                  |                                             |
|  |  |  |  | 462 - 475 | 761.86  | 54.9  | N.VVVGTSDDVC<br>SPCSR.V                 | Carbamidomethyl:<br>9, 12                   |
|  |  |  |  | 378 - 396 | 762.71  | 77.7  | K.AKQDMACLL<br>KEYQEVMSK.<br>L          | Carbamidomethyl:<br>7                       |
|  |  |  |  | 145 - 163 | 772.98  | 26.3  | R.QCCESNLEP<br>LFSGYIETLR.R             | Carbamidomethyl:<br>2, 3; Deamidated:<br>6  |
|  |  |  |  | 433 - 440 | 776.34  | 26.6  | R.GGVVCGDL.<br>C                        | Carbamidomethyl:<br>5                       |
|  |  |  |  | 222 - 241 | 783.12  | 74.4  | R.KSDLEANVE<br>ALIQUETDFLRR.<br>L       |                                             |
|  |  |  |  | 268 - 288 | 801.77  | 83.5  | R.DLNMDNIVA<br>EIKAHYDDIAS<br>R.S       |                                             |
|  |  |  |  | 126 - 144 | 814.12  | 72.1  | R.FLEQQNKLL<br>ETKLQFYQNR.<br>Q         |                                             |
|  |  |  |  | 242 - 262 | 814.8   | 46.6  | R.LYEEEEIRVLQ<br>AHISDTSVIVK.<br>M      |                                             |
|  |  |  |  | 145 - 164 | 824.74  | 27.3  | R.QCCESNLEP<br>LFSGYIETLRR.<br>E        | Carbamidomethyl:<br>2, 3                    |
|  |  |  |  | 417 - 432 | 847.42  | 126.7 | R.LCEGVGAVN<br>VCVSSSR.G                | Carbamidomethyl:<br>2, 11                   |
|  |  |  |  | 417 - 432 | 847.88  | 34.9  | R.LCEGVGAVN<br>VCVSSSR.G                | Carbamidomethyl:<br>2, 11;<br>Deamidated: 9 |
|  |  |  |  | 409 - 432 | 883.43  | 75.4  | R.LLEGEEQRL<br>CEGVGAVNVC<br>VSSSR.G    | Carbamidomethyl:<br>10, 19                  |
|  |  |  |  | 348 - 365 | 886.95  | 43.7  | E.AAVTQAEQQ<br>GAAALADAK.C              | Deamidated: 5                               |
|  |  |  |  | 176 - 191 | 904.98  | 101.9 | R.LSSELNSLQ<br>EVLEGYK.K                |                                             |
|  |  |  |  | 176 - 191 | 905.49  | 92.3  | R.LSSELNSLQ<br>EVLEGYK.K                | Deamidated: 6                               |
|  |  |  |  | 176 - 192 | 969.03  | 59.1  | R.LSSELNSLQ<br>EVLEGYK.K.R              |                                             |
|  |  |  |  | 165 - 191 | 995.8   | 25.9  | R.EAECAEADS<br>GRLSSELNSLQ<br>EVLEGYK.K | Carbamidomethyl:<br>4; Deamidated:<br>17    |
|  |  |  |  | 346 - 365 | 1007.56 | 154.7 | K.LEAAVTQAE<br>QQGAAALADA<br>K.C        |                                             |
|  |  |  |  | 223 - 240 | 1032.01 | 118.2 | K.SDLEANVEA<br>LIQUETDFLR.R             |                                             |

|        |                  |      |      |           |         |       |                                                     |                                                       |
|--------|------------------|------|------|-----------|---------|-------|-----------------------------------------------------|-------------------------------------------------------|
| KAP1.3 | gij940358        | 15.6 |      | 67 - 79   | 628.26  | 18.7  | G.YGQVGSSG<br>AVSSR.T                               | Deamidated: 3                                         |
|        |                  |      |      | 73 - 79   | 663.29  | 18.8  | S.SGAVSSR.T                                         |                                                       |
|        |                  |      |      | 89 - 106  | 968.93  | 23.8  | R.VEGTSLPPC<br>CVVCTSPS.C                           | Carbamidomethyl:<br>9, 10, 14                         |
|        |                  |      |      | 68 - 79   | 546.3   | 78.6  | Y.GQVGSSGAV<br>SSR.T                                |                                                       |
|        |                  |      |      | 67 - 79   | 627.81  | 80.7  | G.YGQVGSSG<br>AVSSR.T                               |                                                       |
|        |                  |      |      | 66 - 79   | 656.33  | 50.1  | I.GYGQVGSSG<br>AVSSR.T                              |                                                       |
|        |                  |      |      | 64 - 79   | 756.38  | 69.7  | G.SIGYGQVGS<br>SGAVSSR.T                            |                                                       |
|        |                  |      |      | 63 - 79   | 784.92  | 104.1 | G.GSIGYGQVG<br>SSGAVSSR.T                           |                                                       |
|        |                  |      |      | 63 - 79   | 785.36  | 80.4  | G.GSIGYGQVG<br>SSGAVSSR.T                           | Deamidated: 7                                         |
|        |                  |      |      | 61 - 79   | 869.9   | 89.6  | G.IGGSIGYGQ<br>VGSSGAVSSR.<br>T                     |                                                       |
|        |                  |      |      | 60 - 79   | 898.41  | 116.9 | C.GIGGSIGYG<br>QVGSSGAVSS<br>R.T                    |                                                       |
|        |                  |      |      | 60 - 79   | 898.94  | 81.2  | C.GIGGSIGYG<br>QVGSSGAVSS<br>R.T                    | Deamidated: 10                                        |
|        |                  |      |      | 27 - 43   | 966.91  | 75.3  | R.STCSQTSCC<br>QPTSIQTS.C                           | Carbamidomethyl:<br>3, 8, 9                           |
|        |                  |      |      | 59 - 79   | 978.46  | 107.8 | G.CGIGGSIGY<br>GQVGSSGAVS<br>SR.T                   | Carbamidomethyl:<br>1                                 |
|        |                  |      |      | 45 - 79   | 1179.52 | 83.8  | C.CQPTCLQTS<br>GCKTGCGIGG<br>SIGYGQVGSS<br>GAVSSR.T | Carbamidomethyl:<br>1, 5, 11, 15;<br>Deamidated: 2, 7 |
| K33b   | gij9990000<br>12 | 45.9 | 4661 | 126 - 134 | 500.83  | 40    | R.LVVQIDNAK.<br>L                                   | Deamidated: 4                                         |
|        |                  |      |      | 135 - 143 | 518.83  | 37.9  | K.LAADDFRTK.<br>Y                                   |                                                       |
|        |                  |      |      | 231 - 240 | 625.84  | 24.5  | Q.YEALVETNR<br>R.D                                  |                                                       |
|        |                  |      |      | 191 - 201 | 685.81  | 18.9  | K.QNHEQEVNT<br>LR.S                                 | Deamidated: 1, 2,<br>5                                |
|        |                  |      |      | 322 - 333 | 708.89  | 20.1  | E.SQLAEIRSDL<br>ER.Q                                |                                                       |
|        |                  |      |      | 229 - 240 | 725.89  | 17.4  | R.AQYEALVET<br>NRR.D                                | Deamidated: 2                                         |
|        |                  |      |      | 122 - 134 | 735.91  | 31.7  | A.ENARLVVQID<br>NAK.L                               | Deamidated: 8                                         |
|        |                  |      |      | 1 - 12    | 759.91  | 15.3  | -<br>.SYNFCLPNLS<br>FR.S                            | Carbamidomethyl:<br>5; Deamidated: 3                  |
|        |                  |      |      | 280 - 292 | 761.41  | 22.1  | N.ALEVELQAQ<br>HNLR.D                               | Deamidated: 7                                         |
|        |                  |      |      | 329 - 347 | 778.09  | 17.7  | R.SDLERQNQE<br>YQVLLDVRAR.<br>L                     |                                                       |

|  |  |  |  |           |        |      |                                                 |                                |
|--|--|--|--|-----------|--------|------|-------------------------------------------------|--------------------------------|
|  |  |  |  | 144 - 163 | 787.78 | 20.6 | K.YQTELGLRQ<br>LVESDINGLRR.<br>I                | Deamidated: 2                  |
|  |  |  |  | 277 - 301 | 946.81 | 15.2 | R.TVNALEVEL<br>QAQHNLRD<br>SL<br>ENTLTE.T       | Deamidated: 3                  |
|  |  |  |  | 202 - 228 | 998.87 | 22.1 | R.SQLGDR<br>LNV<br>EVDAAPT<br>VDLN<br>RVLNETR.A |                                |
|  |  |  |  | 340 - 345 | 357.77 | 49   | Q.VLLDVR.A                                      |                                |
|  |  |  |  | 223 - 228 | 366.19 | 30.3 | R.VLNETR.A                                      |                                |
|  |  |  |  | 135 - 141 | 404.25 | 53.8 | K.LAADDFR.T                                     |                                |
|  |  |  |  | 322 - 328 | 408.76 | 50.8 | E.SQLAEIR.S                                     |                                |
|  |  |  |  | 66 - 72   | 412.23 | 53.8 | R.LASYLEK.V                                     |                                |
|  |  |  |  | 6 - 12    | 423.79 | 50.6 | C.LPNLSFR.S                                     |                                |
|  |  |  |  | 152 - 163 | 467.28 | 34.4 | R.QLVESDINGL<br>RR.I                            |                                |
|  |  |  |  | 79 - 86   | 474.27 | 44.7 | R.ENAELESR.I                                    |                                |
|  |  |  |  | 229 - 240 | 483.94 | 57.3 | R.AQYEALVET<br>NRR.D                            |                                |
|  |  |  |  | 357 - 365 | 489.29 | 29.6 | R.GLLDSEDTK.<br>L                               |                                |
|  |  |  |  | 108 - 115 | 494.81 | 70   | R.TIEELQQK.I                                    |                                |
|  |  |  |  | 126 - 134 | 500.36 | 71.6 | R.LVVQIDNAK.<br>L                               |                                |
|  |  |  |  | 126 - 134 | 500.83 | 49.4 | R.LVVQIDNAK.<br>L                               | Deamidated: 7                  |
|  |  |  |  | 58 - 65   | 512.82 | 36.4 | E.TMQFLNDR.L                                    |                                |
|  |  |  |  | 116 - 125 | 550.31 | 65.6 | K.ILANKAENAR<br>.L                              |                                |
|  |  |  |  | 164 - 172 | 552.82 | 74.2 | R.ILDELTLCK.S                                   | Carbamidomethyl:<br>8          |
|  |  |  |  | 241 - 248 | 555.32 | 53.1 | R.DVEEWYIR.Q                                    |                                |
|  |  |  |  | 348 - 356 | 562.83 | 62.1 | R.LESEINTYR.<br>G                               |                                |
|  |  |  |  | 348 - 356 | 563.31 | 57.3 | R.LESEINTYR.<br>G                               | Deamidated: 6                  |
|  |  |  |  | 57 - 65   | 577.32 | 62.8 | K.ETMQFLNDR<br>.L                               |                                |
|  |  |  |  | 4 - 12    | 577.36 | 37   | N.FCLPNLSFR.<br>S                               | Carbamidomethyl:<br>2          |
|  |  |  |  | 57 - 65   | 577.83 | 32.8 | K.ETMQFLNDR<br>.L                               | Deamidated: 4                  |
|  |  |  |  | 57 - 65   | 585.29 | 58.5 | K.ETMQFLNDR<br>.L                               | Oxidation: 3                   |
|  |  |  |  | 57 - 65   | 585.78 | 34.4 | K.ETMQFLNDR<br>.L                               | Oxidation: 3;<br>Deamidated: 4 |

|  |  |  |  |           |        |       |                            |                                          |
|--|--|--|--|-----------|--------|-------|----------------------------|------------------------------------------|
|  |  |  |  | 212 - 222 | 585.86 | 45.8  | E.VDAAPTVDL<br>NR.V        |                                          |
|  |  |  |  | 142 - 151 | 604.82 | 34.6  | R.TKYQTELGL<br>R.Q         |                                          |
|  |  |  |  | 142 - 151 | 605.37 | 72    | R.TKYQTELGL<br>R.Q         | Deamidated: 4                            |
|  |  |  |  | 173 - 183 | 609.86 | 84    | K.SDLEAQVES<br>LK.E        |                                          |
|  |  |  |  | 181 - 190 | 616.9  | 27.3  | E.SLKEELICK.<br>Q          | Carbamidomethyl:<br>8                    |
|  |  |  |  | 394 - 404 | 621.78 | 76.6  | R.SRFGPCNTS<br>GC.-        | Carbamidomethyl:<br>6, 11                |
|  |  |  |  | 152 - 162 | 622.86 | 31.4  | R.QLVESDINGL<br>R.R        | Deamidated: 8                            |
|  |  |  |  | 163 - 172 | 630.92 | 40    | R.RILDELTLCK.<br>S         | Carbamidomethyl:<br>9                    |
|  |  |  |  | 3 - 12    | 634.3  | 39.1  | Y.NFCLPNLSF<br>R.S         | Carbamidomethyl:<br>3                    |
|  |  |  |  | 46 - 56   | 644.82 | 49.6  | W.FCEGSFNG<br>NEK.E        | Carbamidomethyl:<br>2                    |
|  |  |  |  | 229 - 239 | 647.36 | 79.3  | R.AQYEALVET<br>NR.R        |                                          |
|  |  |  |  | 91 - 101  | 650.34 | 39.6  | R.SQQQEPLVC<br>PN.Y        | Carbamidomethyl:<br>9                    |
|  |  |  |  | 75 - 90   | 662.4  | 30.8  | R.QLERENAEL<br>ESRILER.S   |                                          |
|  |  |  |  | 135 - 151 | 666.73 | 34.9  | K.LAADDFRTK<br>YQTELGLR.Q  | Deamidated: 11                           |
|  |  |  |  | 282 - 292 | 668.9  | 50.2  | L.EVELQAQHN<br>LR.D        |                                          |
|  |  |  |  | 202 - 213 | 672.89 | 31.6  | R.SQLGDRLNV<br>EVD.A       |                                          |
|  |  |  |  | 126 - 143 | 673.09 | 47.8  | R.LVVQIDNAKL<br>AADDFRTK.Y |                                          |
|  |  |  |  | 346 - 356 | 676.37 | 67.6  | R.ARLESEINTY<br>R.G        |                                          |
|  |  |  |  | 294 - 305 | 682.37 | 78.8  | D.SLENTLTETE<br>AR.Y       |                                          |
|  |  |  |  | 260 - 276 | 684.07 | 25.6  | S.SSEQLQSYQ<br>AEIILRR.T   |                                          |
|  |  |  |  | 108 - 125 | 690.41 | 58.8  | R.TIEELQQKIL<br>ANKAENAR.L |                                          |
|  |  |  |  | 173 - 190 | 702.37 | 43.1  | K.SDLEAQVES<br>LKEELICK.Q  | Carbamidomethyl:<br>16; Deamidated:<br>6 |
|  |  |  |  | 228 - 239 | 725.37 | 49.5  | T.RAQYEALVE<br>TNR.R       |                                          |
|  |  |  |  | 179 - 190 | 730.95 | 76.7  | Q.VESLKEELIC<br>LK.Q       | Carbamidomethyl:<br>10                   |
|  |  |  |  | 75 - 86   | 737.36 | 37.5  | R.QLERENAEL<br>ESR.I       |                                          |
|  |  |  |  | 57 - 74   | 738.41 | 55.1  | K.ETMQFLNDR<br>LASYLEKVR.Q |                                          |
|  |  |  |  | 293 - 305 | 739.89 | 103.6 | R.DSLENTLTET<br>EAR.Y      |                                          |
|  |  |  |  | 293 - 305 | 740.35 | 83.9  | R.DSLENTLTET<br>EAR.Y      | Deamidated: 5                            |

|      |            |    |        |           |         |       |                                                |                                                |
|------|------------|----|--------|-----------|---------|-------|------------------------------------------------|------------------------------------------------|
|      |            |    |        | 173 - 191 | 744.76  | 42.8  | K.SDLEAQVES<br>LKEELICKQ.N                     | Carbamidomethyl:<br>16                         |
|      |            |    |        | 334 - 345 | 752.95  | 94.3  | R.QNQEQVLL<br>DVR.A                            |                                                |
|      |            |    |        | 334 - 345 | 753.44  | 54.7  | R.QNQEQVLL<br>DVR.A                            | Deamidated: 3                                  |
|      |            |    |        | 1 - 12    | 759.39  | 46.4  | -<br>.SYNFCLPNLS<br>FR.S                       | Carbamidomethyl:<br>5                          |
|      |            |    |        | 202 - 222 | 761.43  | 76.6  | R.SQLGDRNLV<br>EVDAAPTVDLN<br>R.V              |                                                |
|      |            |    |        | 208 - 228 | 780.12  | 53.5  | R.LNVEVDAAP<br>TVDLNRVLNET<br>R.A              |                                                |
|      |            |    |        | 144 - 163 | 787.44  | 31.1  | K.YQTELGLRQ<br>LVESDINGLRR.<br>I               |                                                |
|      |            |    |        | 208 - 222 | 813.48  | 88    | R.LNVEVDAAP<br>TVDLNR.V                        |                                                |
|      |            |    |        | 208 - 222 | 813.98  | 29.2  | R.LNVEVDAAP<br>TVDLNR.V                        | Deamidated: 14                                 |
|      |            |    |        | 173 - 187 | 852.01  | 26.5  | K.SDLEAQVES<br>LKEELI.C                        |                                                |
|      |            |    |        | 73 - 86   | 864.93  | 60.8  | K.VRQLERENA<br>ELES.R.I                        |                                                |
|      |            |    |        | 87 - 107  | 885.79  | 77.8  | R.ILERSQQQE<br>PLVCPNYQSYF<br>R.T              | Carbamidomethyl:<br>13                         |
|      |            |    |        | 306 - 328 | 888.82  | 38.9  | R.YSCQLSQVQ<br>SLIVNVESQLA<br>EIR.S            | Carbamidomethyl:<br>3                          |
|      |            |    |        | 126 - 141 | 894.51  | 119.9 | R.LVVQIDNAKL<br>AADDFR.T                       |                                                |
|      |            |    |        | 126 - 141 | 895.03  | 78.6  | R.LVVQIDNAKL<br>AADDFR.T                       | Deamidated: 4                                  |
|      |            |    |        | 277 - 292 | 918.03  | 119.9 | R.TVNALEVEL<br>QAQHNL.R.D                      |                                                |
|      |            |    |        | 277 - 292 | 918.49  | 102.4 | R.TVNALEVEL<br>QAQHNL.R.D                      | Deamidated: 10                                 |
|      |            |    |        | 277 - 292 | 918.5   | 57.6  | R.TVNALEVEL<br>QAQHNL.R.D                      | Deamidated: 3                                  |
|      |            |    |        | 57 - 72   | 979.51  | 75.9  | K.ETMQFLNDR<br>LASYLEK.V                       |                                                |
|      |            |    |        | 57 - 72   | 980     | 48    | K.ETMQFLNDR<br>LASYLEK.V                       | Deamidated: 7                                  |
|      |            |    |        | 173 - 190 | 1052.56 | 91.8  | K.SDLEAQVES<br>LKEELICK.Q                      | Carbamidomethyl:<br>16                         |
|      |            |    |        | 91 - 107  | 1072.52 | 78.7  | R.SQQQEPLVC<br>PNYQSYFR.T                      | Carbamidomethyl:<br>9                          |
|      |            |    |        | 306 - 333 | 1089.87 | 36.9  | R.YSCQLSQVQ<br>SLIVNVESQLA<br>EIRSDLER.Q       | Carbamidomethyl:<br>3; Deamidated: 4,<br>7, 14 |
|      |            |    |        | 277 - 305 | 1099.22 | 57.1  | R.TVNALEVEL<br>QAQHNL.RDSL<br>ENTLTETEAR.<br>Y | Deamidated: 3                                  |
| K33a | gij9990000 | 46 | 3895.3 | 126 - 134 | 500.83  | 40    | R.LVVQIDNAK.<br>L                              | Deamidated: 4                                  |

|      |    |  |  |           |        |      |                                         |                                            |
|------|----|--|--|-----------|--------|------|-----------------------------------------|--------------------------------------------|
| var1 | 14 |  |  |           |        |      |                                         |                                            |
|      |    |  |  | 75 - 86   | 514.95 | 19.7 | R.QLERENAEL<br>ERR.I                    |                                            |
|      |    |  |  | 348 - 356 | 599.81 | 24   | R.LECEINTYR.<br>G                       | Carbamidomethyl:<br>3; Deamidated: 6       |
|      |    |  |  | 231 - 240 | 625.84 | 24.5 | Q.YEALVETNR<br>R.D                      |                                            |
|      |    |  |  | 191 - 201 | 685.81 | 18.9 | K.QNHEQEVNT<br>LR.S                     | Deamidated: 1, 2,<br>5                     |
|      |    |  |  | 152 - 163 | 692.42 | 19.2 | R.QLVEADLNG<br>LRR.I                    |                                            |
|      |    |  |  | 322 - 333 | 708.89 | 20.1 | E.SQLAEIRSDL<br>ER.Q                    |                                            |
|      |    |  |  | 229 - 240 | 725.89 | 17.4 | R.AQYEALVET<br>NRR.D                    | Deamidated: 2                              |
|      |    |  |  | 122 - 134 | 735.91 | 31.7 | S.ENARLVVQID<br>NAK.L                   | Deamidated: 8                              |
|      |    |  |  | 280 - 292 | 761.41 | 22.1 | N.ALEVELQAQ<br>HNL.R.D                  | Deamidated: 7                              |
|      |    |  |  | 329 - 347 | 778.09 | 17.7 | R.SDLERQNQE<br>YQVLLDVRAR.<br>L         |                                            |
|      |    |  |  | 277 - 301 | 946.81 | 15.2 | R.TVNALEVEL<br>QAQHNL.RDSL<br>ENTL.TE.T | Deamidated: 3                              |
|      |    |  |  | 340 - 345 | 357.77 | 49   | Q.VLLDVR.A                              |                                            |
|      |    |  |  | 223 - 228 | 366.19 | 30.3 | H.VLNETR.A                              |                                            |
|      |    |  |  | 322 - 328 | 408.76 | 50.8 | E.SQLAEIR.S                             |                                            |
|      |    |  |  | 135 - 141 | 412.22 | 56.1 | K.LASDDFR.T                             |                                            |
|      |    |  |  | 66 - 72   | 412.23 | 53.8 | R.LASYLEK.V                             |                                            |
|      |    |  |  | 6 - 12    | 423.79 | 50.6 | C.LPNLSFR.S                             |                                            |
|      |    |  |  | 229 - 240 | 483.94 | 57.3 | R.AQYEALVET<br>NRR.D                    |                                            |
|      |    |  |  | 108 - 115 | 494.81 | 70   | R.TIEELQQK.I                            |                                            |
|      |    |  |  | 144 - 151 | 498.8  | 53.6 | K.YETEVSRLR.Q                           |                                            |
|      |    |  |  | 126 - 134 | 500.36 | 71.6 | R.LVVQIDNAK.<br>L                       |                                            |
|      |    |  |  | 126 - 134 | 500.83 | 49.4 | R.LVVQIDNAK.<br>L                       | Deamidated: 7                              |
|      |    |  |  | 58 - 65   | 512.82 | 36.4 | E.TMQFLNDR.L                            |                                            |
|      |    |  |  | 357 - 365 | 518.78 | 45.4 | R.GLLDSEDCK.<br>L                       | Carbamidomethyl:<br>8                      |
|      |    |  |  | 395 - 403 | 546.27 | 59.9 | R.CGPCNTFVH<br>.-                       | Carbamidomethyl:<br>1, 4                   |
|      |    |  |  | 395 - 403 | 546.76 | 59.2 | R.CGPCNTFVH<br>.-                       | Carbamidomethyl:<br>1, 4; Deamidated:<br>5 |



|  |  |  |  |           |        |       |                            |                                |
|--|--|--|--|-----------|--------|-------|----------------------------|--------------------------------|
|  |  |  |  | 73 - 85   | 547.98 | 28.9  | K.VRQLERENA<br>ELER.R      |                                |
|  |  |  |  | 164 - 172 | 552.82 | 74.2  | R.ILDELTLCK.S              | Carbamidomethyl:<br>8          |
|  |  |  |  | 241 - 248 | 555.32 | 53.1  | R.DVEEWYIR.Q               |                                |
|  |  |  |  | 57 - 65   | 577.32 | 62.8  | K.ETMQFLNDR<br>.L          |                                |
|  |  |  |  | 4 - 12    | 577.36 | 37    | N.FCLPNLSFR.<br>S          | Carbamidomethyl:<br>2          |
|  |  |  |  | 57 - 65   | 577.83 | 32.8  | K.ETMQFLNDR<br>.L          | Deamidated: 4                  |
|  |  |  |  | 57 - 65   | 585.29 | 58.5  | K.ETMQFLNDR<br>.L          | Oxidation: 3                   |
|  |  |  |  | 57 - 65   | 585.78 | 34.4  | K.ETMQFLNDR<br>.L          | Oxidation: 3;<br>Deamidated: 4 |
|  |  |  |  | 348 - 356 | 599.31 | 69.2  | R.LECEINTYR.<br>G          | Carbamidomethyl:<br>3          |
|  |  |  |  | 142 - 151 | 613.36 | 66.6  | R.TKYETEVS<br>L.R.Q        |                                |
|  |  |  |  | 152 - 162 | 614.41 | 63.4  | R.QLVEADLNG<br>LR.R        |                                |
|  |  |  |  | 152 - 162 | 614.89 | 56.4  | R.QLVEADLNG<br>LR.R        | Deamidated: 8                  |
|  |  |  |  | 181 - 190 | 616.9  | 27.3  | E.SLKEELICK.<br>Q          | Carbamidomethyl:<br>8          |
|  |  |  |  | 163 - 172 | 630.92 | 40    | R.RILDELTLCK.<br>S         | Carbamidomethyl:<br>9          |
|  |  |  |  | 3 - 12    | 634.3  | 39.1  | F.NFCLPNLSF<br>R.S         | Carbamidomethyl:<br>3          |
|  |  |  |  | 46 - 56   | 644.82 | 49.6  | W.FCEGSFNG<br>NEK.E        | Carbamidomethyl:<br>2          |
|  |  |  |  | 229 - 239 | 647.36 | 79.3  | R.AQYEALVET<br>NR.R        |                                |
|  |  |  |  | 91 - 101  | 650.34 | 39.6  | R.SQQQEPLVC<br>PN.Y        | Carbamidomethyl:<br>9          |
|  |  |  |  | 282 - 292 | 668.9  | 50.2  | L.EVELQAQHN<br>LR.D        |                                |
|  |  |  |  | 202 - 213 | 672.89 | 31.6  | R.SQLGDRNLV<br>EVD.A       |                                |
|  |  |  |  | 393 - 403 | 674.8  | 34.3  | R.TRCGPCNTF<br>VH.-        | Carbamidomethyl:<br>3, 6       |
|  |  |  |  | 294 - 305 | 682.37 | 78.8  | D.SLENTLTETE<br>AR.Y       |                                |
|  |  |  |  | 108 - 125 | 706.36 | 66.9  | R.TIEELQQKIL<br>CGKSENAR.L | Carbamidomethyl:<br>11         |
|  |  |  |  | 346 - 356 | 712.85 | 55.8  | R.ARLECEINTY<br>R.G        | Carbamidomethyl:<br>5          |
|  |  |  |  | 228 - 239 | 725.37 | 49.5  | T.RAQYEALVE<br>TNR.R       |                                |
|  |  |  |  | 179 - 190 | 730.95 | 76.7  | R.VESLKEELIC<br>LK.Q       | Carbamidomethyl:<br>10         |
|  |  |  |  | 57 - 74   | 738.41 | 55.1  | K.ETMQFLNDR<br>LASYLEKVR.Q |                                |
|  |  |  |  | 293 - 305 | 739.89 | 103.6 | R.DSLENTLTET<br>EAR.Y      |                                |
|  |  |  |  | 293 - 305 | 740.35 | 83.9  | R.DSLENTLTET<br>EAR.Y      | Deamidated: 5                  |

|     |                  |      |        |           |         |       |                                                |                                      |
|-----|------------------|------|--------|-----------|---------|-------|------------------------------------------------|--------------------------------------|
|     |                  |      |        | 1 - 12    | 751.39  | 61.6  | -<br>.SFNFCLPNLSF<br>R.S                       | Carbamidomethyl:<br>5                |
|     |                  |      |        | 1 - 12    | 751.89  | 54.8  | -<br>.SFNFCLPNLSF<br>R.S                       | Carbamidomethyl:<br>5; Deamidated: 3 |
|     |                  |      |        | 334 - 345 | 752.95  | 94.3  | R.QNQEQVLL<br>DVR.A                            |                                      |
|     |                  |      |        | 334 - 345 | 753.44  | 54.7  | R.QNQEQVLL<br>DVR.A                            | Deamidated: 3                        |
|     |                  |      |        | 208 - 228 | 773.77  | 32.5  | R.LNVEVDAAP<br>TVDLNHVLNET<br>R.A              |                                      |
|     |                  |      |        | 108 - 120 | 780.43  | 54    | R.TIEELQQKIL<br>CGK.S                          | Carbamidomethyl:<br>11               |
|     |                  |      |        | 87 - 107  | 885.79  | 77.8  | R.ILERSQQQE<br>PLVCPNYQSYF<br>R.T              | Carbamidomethyl:<br>13               |
|     |                  |      |        | 164 - 178 | 888.46  | 70    | R.ILDELTCKS<br>DLEAR.V                         | Carbamidomethyl:<br>8                |
|     |                  |      |        | 306 - 328 | 888.81  | 48.1  | R.YSCQLNQVQ<br>SLIVSVESQLA<br>EIR.S            | Carbamidomethyl:<br>3                |
|     |                  |      |        | 277 - 292 | 918.03  | 119.9 | R.TVNALEVEL<br>QAQHNL.R.D                      |                                      |
|     |                  |      |        | 277 - 292 | 918.49  | 102.4 | R.TVNALEVEL<br>QAQHNL.R.D                      | Deamidated: 10                       |
|     |                  |      |        | 277 - 292 | 918.5   | 57.6  | R.TVNALEVEL<br>QAQHNL.R.D                      | Deamidated: 3                        |
|     |                  |      |        | 57 - 72   | 979.51  | 75.9  | K.ETMQFLNDR<br>LASYLEK.V                       |                                      |
|     |                  |      |        | 57 - 72   | 980     | 48    | K.ETMQFLNDR<br>LASYLEK.V                       | Deamidated: 7                        |
|     |                  |      |        | 202 - 228 | 992.52  | 89.6  | R.SQLGDRNLV<br>EVDAAPTVDLN<br>HVLNETR.A        |                                      |
|     |                  |      |        | 91 - 107  | 1072.52 | 78.7  | R.SQQQEPLVC<br>PNYQSYFR.T                      | Carbamidomethyl:<br>9                |
|     |                  |      |        | 277 - 305 | 1099.22 | 57.1  | R.TVNALEVEL<br>QAQHNL.RDSL<br>ENTLTETEAR.<br>Y | Deamidated: 3                        |
| K35 | gij9990000<br>05 | 49.7 | 2020.5 | 58 - 65   | 449.64  | 18.1  | K.SSCRAASC.L                                   | Carbamidomethyl:<br>3, 8             |
|     |                  |      |        | 167 - 175 | 500.83  | 40    | R.LVVQIDNAK.<br>L                              | Deamidated: 4                        |
|     |                  |      |        | 176 - 184 | 518.83  | 37.9  | K.LAADDFRTK.<br>Y                              |                                      |
|     |                  |      |        | 163 - 175 | 735.91  | 31.7  | S.ENARLVVQID<br>NAK.L                          | Deamidated: 8                        |
|     |                  |      |        | 321 - 333 | 772.44  | 15.3  | N.ALEIELQAQH<br>SMR.D                          | Oxidation: 12;<br>Deamidated: 7, 9   |
|     |                  |      |        | 346 - 369 | 898.17  | 17.9  | A.RYSSQLAQM<br>QGLIGNVESQL<br>AEIR.C           | Deamidated: 10                       |
|     |                  |      |        | 381 - 386 | 357.77  | 49    | Q.VLLDVR.A                                     |                                      |

|  |  |  |  |           |        |       |                                   |                                |
|--|--|--|--|-----------|--------|-------|-----------------------------------|--------------------------------|
|  |  |  |  | 176 - 182 | 404.25 | 53.8  | K.LAADDFR.T                       |                                |
|  |  |  |  | 363 - 369 | 408.76 | 50.8  | E.SQLAEIR.C                       |                                |
|  |  |  |  | 107 - 113 | 412.23 | 53.8  | R.LASYLEK.V                       |                                |
|  |  |  |  | 120 - 127 | 474.27 | 44.7  | R.ENAELESR.I                      |                                |
|  |  |  |  | 149 - 156 | 494.81 | 70    | Q.TIEELQKK.I                      |                                |
|  |  |  |  | 167 - 175 | 500.36 | 71.6  | R.LVVQIDNAK.<br>L                 |                                |
|  |  |  |  | 167 - 175 | 500.83 | 49.4  | R.LVVQIDNAK.<br>L                 | Deamidated: 7                  |
|  |  |  |  | 99 - 106  | 512.82 | 36.4  | E.TMQFLNDR.L                      |                                |
|  |  |  |  | 398 - 406 | 518.78 | 45.4  | R.GLLDSEDCK.<br>L                 | Carbamidomethyl:<br>8          |
|  |  |  |  | 98 - 106  | 577.32 | 62.8  | K.ETMQFLNDR<br>.L                 |                                |
|  |  |  |  | 98 - 106  | 577.83 | 32.8  | K.ETMQFLNDR<br>.L                 | Deamidated: 4                  |
|  |  |  |  | 98 - 106  | 585.29 | 58.5  | K.ETMQFLNDR<br>.L                 | Oxidation: 3                   |
|  |  |  |  | 98 - 106  | 585.78 | 34.4  | K.ETMQFLNDR<br>.L                 | Oxidation: 3;<br>Deamidated: 4 |
|  |  |  |  | 389 - 397 | 585.82 | 59.9  | R.LECEISTYR.<br>G                 | Carbamidomethyl:<br>3          |
|  |  |  |  | 222 - 231 | 616.9  | 27.3  | E.SLKEELLCLK<br>.K                | Carbamidomethyl:<br>8          |
|  |  |  |  | 167 - 184 | 673.09 | 47.8  | R.LVVQIDNAKL<br>AADDFR.TK.Y       |                                |
|  |  |  |  | 301 - 317 | 684.07 | 25.6  | S.SSEQLQSYQ<br>AEIIELR.R.T        |                                |
|  |  |  |  | 387 - 397 | 699.37 | 37.2  | R.ARLECEISTY<br>R.G               | Carbamidomethyl:<br>5          |
|  |  |  |  | 334 - 346 | 703.41 | 85.6  | R.DALESTLAET<br>EAR.Y             |                                |
|  |  |  |  | 220 - 231 | 730.95 | 76.7  | Q.VESLKEELL<br>CLK.K              | Carbamidomethyl:<br>10         |
|  |  |  |  | 116 - 127 | 737.36 | 37.5  | R.QLERENAEL<br>ESR.I              |                                |
|  |  |  |  | 98 - 115  | 738.41 | 55.1  | K.ETMQFLNDR<br>LASYLEKVR.Q        |                                |
|  |  |  |  | 214 - 232 | 739.44 | 34.9  | K.ADLEAQVES<br>LKEELLCLKK.N       | Carbamidomethyl:<br>16         |
|  |  |  |  | 375 - 386 | 752.95 | 94.3  | R.QNQEQVLL<br>DVR.A               |                                |
|  |  |  |  | 375 - 386 | 753.44 | 54.7  | R.QNQEQVLL<br>DVR.A               | Deamidated: 3                  |
|  |  |  |  | 162 - 182 | 782.42 | 71.3  | K.SENARLVVQI<br>DNAKLAADD<br>FR.T |                                |
|  |  |  |  | 114 - 127 | 864.93 | 60.8  | K.VRQLERENA<br>ELESR.I            |                                |
|  |  |  |  | 167 - 182 | 894.51 | 119.9 | R.LVVQIDNAKL<br>AADDFR.T          |                                |

|     |                  |      |        |           |        |      |                          |                           |
|-----|------------------|------|--------|-----------|--------|------|--------------------------|---------------------------|
|     |                  |      |        | 167 - 182 | 895.03 | 78.6 | R.LVVQIDNAKL<br>AADDFR.T | Deamidated: 4             |
|     |                  |      |        | 98 - 113  | 979.51 | 75.9 | K.ETMQFLNDR<br>LASYLEK.V |                           |
|     |                  |      |        | 98 - 113  | 980    | 48   | K.ETMQFLNDR<br>LASYLEK.V | Deamidated: 7             |
| K81 | gij9990000<br>07 | 55.1 | 4216.7 | 408 - 416 | 565.33 | 46.2 | R.RLLEGQEQR<br>.L        | Deamidated: 6             |
|     |                  |      |        | 213 - 221 | 570.35 | 19.1 | K.KDVDCAYLR.<br>K        | Carbamidomethyl:<br>5     |
|     |                  |      |        | 408 - 417 | 621.85 | 22.8 | R.RLLEGQEQR<br>L.C       | Deamidated: 6             |
|     |                  |      |        | 125 - 134 | 631.38 | 27.8 | R.FLEQQNKLL<br>E.T       |                           |
|     |                  |      |        | 320 - 324 | 633.35 | 16.5 | K.EEINE.L                |                           |
|     |                  |      |        | 1 - 13    | 731.88 | 16.9 | .TCGSGFRGRA<br>FSC.V     | Carbamidomethyl:<br>2, 13 |
|     |                  |      |        | 33 - 38   | 378.17 | 29   | R.GISCYR.G               | Carbamidomethyl:<br>4     |
|     |                  |      |        | 116 - 122 | 406.25 | 61.3 | R.FAAFIDK.V              |                           |
|     |                  |      |        | 39 - 47   | 426.21 | 56.8 | R.GLTGGFGSR<br>.S        |                           |
|     |                  |      |        | 125 - 131 | 453.78 | 35.3 | R.FLEQQNK.L              |                           |
|     |                  |      |        | 397 - 408 | 473.95 | 67   | K.LGLDIEIATY<br>RR.L     |                           |
|     |                  |      |        | 242 - 248 | 476.29 | 47.5 | R.LYEEEEIR.V             |                           |
|     |                  |      |        | 254 - 262 | 481.35 | 33.8 | H.ISDTSVIVK.M            |                           |
|     |                  |      |        | 409 - 416 | 487.3  | 59.9 | R.LLEGQEQR.L             | Deamidated: 5             |
|     |                  |      |        | 332 - 340 | 487.78 | 48.9 | R.LTAEVENAK.<br>C        |                           |
|     |                  |      |        | 194 - 201 | 504.82 | 56.5 | R.YEEVALR.A              |                           |
|     |                  |      |        | 214 - 221 | 506.27 | 45.7 | K.DVDCAYLR.K             | Carbamidomethyl:<br>4     |
|     |                  |      |        | 291 - 298 | 506.29 | 57   | R.AEASWYR.<br>S          |                           |
|     |                  |      |        | 10 - 23   | 507.94 | 40.4 | R.AFSCVSACG<br>PRPGR.C   | Carbamidomethyl:<br>4, 8  |
|     |                  |      |        | 320 - 327 | 508.79 | 39.4 | K.EEINELNR.V             |                           |
|     |                  |      |        | 280 - 288 | 519.77 | 75   | K.AQYDDIASR.<br>S        |                           |
|     |                  |      |        | 332 - 345 | 531.28 | 40   | R.LTAEVENAK<br>CQNSK.L   | Carbamidomethyl:<br>10    |
|     |                  |      |        | 116 - 124 | 533.84 | 64.3 | R.FAAFIDKVR.<br>F        |                           |
|     |                  |      |        | 368 - 377 | 536.33 | 87.2 | K.LAGLEEALQ<br>K.A       |                           |
|     |                  |      |        | 409 - 417 | 543.84 | 57.4 | R.LLEGQEQRL.<br>C        | Deamidated: 5             |

|  |  |  |  |           |        |       |                          |                                      |
|--|--|--|--|-----------|--------|-------|--------------------------|--------------------------------------|
|  |  |  |  | 423 - 432 | 547.78 | 43.7  | G.SVNVCVSSS<br>R.G       | Carbamidomethyl:<br>5                |
|  |  |  |  | 241 - 248 | 554.33 | 49.8  | R.RLYEEEEIR.V            |                                      |
|  |  |  |  | 24 - 32   | 556.3  | 57.9  | R.CCITAAPYR.<br>G        | Carbamidomethyl:<br>1, 2             |
|  |  |  |  | 388 - 396 | 564.31 | 40.6  | K.EYQEVMSK<br>.L         |                                      |
|  |  |  |  | 328 - 337 | 579.38 | 47.2  | R.VIQRLTAEVE<br>.N       |                                      |
|  |  |  |  | 318 - 331 | 581.34 | 49.7  | R.TKEEINELNR<br>VIQR.L   |                                      |
|  |  |  |  | 193 - 201 | 582.84 | 56.1  | R.RYEEEEVALR.<br>A       |                                      |
|  |  |  |  | 378 - 387 | 589.26 | 63    | K.AKQDMACLL<br>K.E       | Carbamidomethyl:<br>7                |
|  |  |  |  | 202 - 212 | 596.87 | 76.3  | R.ATAENEFVA<br>LK.K      |                                      |
|  |  |  |  | 378 - 387 | 597.34 | 38.8  | K.AKQDMACLL<br>K.E       | Carbamidomethyl:<br>7; Oxidation: 5  |
|  |  |  |  | 164 - 174 | 597.76 | 83    | R.EAECAEADS<br>GR.L      | Carbamidomethyl:<br>4                |
|  |  |  |  | 367 - 377 | 600.41 | 80.9  | R.KLAGLEEAL<br>QK.A      |                                      |
|  |  |  |  | 10 - 20   | 606.25 | 35.4  | R.AFSCVSACG<br>PR.P      | Carbamidomethyl:<br>4, 8             |
|  |  |  |  | 301 - 310 | 609.89 | 64.6  | K.CEEIKATVIR.<br>H       | Carbamidomethyl:<br>1                |
|  |  |  |  | 291 - 300 | 613.82 | 54.5  | R.AEAESWYRS<br>K.C       |                                      |
|  |  |  |  | 318 - 327 | 623.35 | 61.2  | R.TKEEINELNR<br>.V       |                                      |
|  |  |  |  | 289 - 298 | 627.83 | 69.4  | R.SRAEAESWY<br>R.S       |                                      |
|  |  |  |  | 269 - 279 | 630.4  | 54.9  | D.LNMDNIVAEI<br>K.A      |                                      |
|  |  |  |  | 397 - 407 | 632.41 | 104.3 | K.LGLDIEIATY<br>R.R      |                                      |
|  |  |  |  | 368 - 379 | 635.91 | 73.9  | K.LAGLEEALQ<br>KAK.Q     |                                      |
|  |  |  |  | 280 - 290 | 641.31 | 37    | K.AQYDDIASR<br>SR.A      |                                      |
|  |  |  |  | 202 - 213 | 660.86 | 81.7  | R.ATAENEFVA<br>LKK.D     |                                      |
|  |  |  |  | 268 - 279 | 687.92 | 96    | R.DLNMDNIVA<br>EIK.A     |                                      |
|  |  |  |  | 268 - 279 | 695.91 | 73.1  | R.DLNMDNIVA<br>EIK.A     | Oxidation: 4                         |
|  |  |  |  | 380 - 396 | 696.7  | 26.6  | K.QDMACLLKE<br>YQEVMSK.L | Carbamidomethyl:<br>5; Deamidated: 1 |
|  |  |  |  | 268 - 279 | 696.89 | 34.7  | R.DLNMDNIVA<br>EIK.A     | Oxidation: 4;<br>Deamidated: 3, 6    |
|  |  |  |  | 91 - 102  | 700.9  | 54.2  | L.NLEIDPNAQC<br>VK.Q     | Carbamidomethyl:<br>10               |
|  |  |  |  | 328 - 340 | 735.91 | 72.6  | R.VIQRLTAEVE<br>NAK.C    |                                      |
|  |  |  |  | 125 - 136 | 745.94 | 62.7  | R.FLEQQNKLL<br>ETK.L     |                                      |

|     |                  |      |        |           |         |       |                                         |                                            |
|-----|------------------|------|--------|-----------|---------|-------|-----------------------------------------|--------------------------------------------|
|     |                  |      |        | 249 - 262 | 755.48  | 73    | R.VLQAHISDTS<br>VIVK.M                  |                                            |
|     |                  |      |        | 378 - 396 | 762.71  | 77.7  | K.AKQDMACLL<br>KEYQEVMSK.<br>L          | Carbamidomethyl:<br>7                      |
|     |                  |      |        | 144 - 162 | 772.98  | 26.3  | R.QCCESNLEP<br>LFSGYIETLR.R             | Carbamidomethyl:<br>2, 3; Deamidated:<br>6 |
|     |                  |      |        | 433 - 440 | 776.34  | 26.6  | R.GGVVCGDL.<br>C                        | Carbamidomethyl:<br>5                      |
|     |                  |      |        | 222 - 241 | 783.12  | 74.4  | R.KSDLEANVE<br>ALIQETDFLR.<br>L         |                                            |
|     |                  |      |        | 268 - 288 | 798.75  | 58.5  | R.DLNMDNIVA<br>EIKAQYDDIAS<br>R.S       |                                            |
|     |                  |      |        | 268 - 288 | 804.07  | 84.4  | R.DLNMDNIVA<br>EIKAQYDDIAS<br>R.S       | Oxidation: 4                               |
|     |                  |      |        | 125 - 143 | 814.12  | 72.1  | R.FLEQQNKLL<br>ETKLQFYQNR.<br>Q         |                                            |
|     |                  |      |        | 242 - 262 | 814.8   | 46.6  | R.LYEEEEIRVLQ<br>AHISDTSVIVK.<br>M      |                                            |
|     |                  |      |        | 144 - 163 | 824.74  | 27.3  | R.QCCESNLEP<br>LFSGYIETLR.<br>E         | Carbamidomethyl:<br>2, 3                   |
|     |                  |      |        | 417 - 432 | 855.43  | 123.7 | R.LCEGVGSVN<br>VCVSSSR.G                | Carbamidomethyl:<br>2, 11                  |
|     |                  |      |        | 348 - 365 | 886.95  | 43.7  | E.AAVTQAEQQ<br>GEAALADAK.R              | Deamidated: 5                              |
|     |                  |      |        | 175 - 190 | 904.98  | 101.9 | R.LSSELNSLQ<br>EVLEGYK.K                |                                            |
|     |                  |      |        | 175 - 190 | 905.49  | 92.3  | R.LSSELNSLQ<br>EVLEGYK.K                | Deamidated: 6                              |
|     |                  |      |        | 175 - 191 | 969.03  | 59.1  | R.LSSELNSLQ<br>EVLEGYK.K.R              |                                            |
|     |                  |      |        | 164 - 190 | 995.8   | 25.9  | R.EAECAEADS<br>GRLSSELNSLQ<br>EVLEGYK.K | Carbamidomethyl:<br>4; Deamidated:<br>17   |
|     |                  |      |        | 346 - 365 | 1007.56 | 154.7 | K.LEAAVTQAE<br>QQGEAALADA<br>K.R        |                                            |
|     |                  |      |        | 223 - 240 | 1032.01 | 118.2 | K.SDLEANVEA<br>LIQETDFLR.R              |                                            |
| K86 | gij9990000<br>10 | 54.8 | 4589.9 | 65 - 71   | 375.27  | 24.2  | R.IAVSGFR.A                             |                                            |
|     |                  |      |        | 492 - 501 | 509.81  | 36.4  | R.VGGSILGCK<br>K.C                      | Carbamidomethyl:<br>8                      |
|     |                  |      |        | 424 - 432 | 565.33  | 46.2  | R.RLLEGEEQR.<br>L                       |                                            |
|     |                  |      |        | 229 - 237 | 570.35  | 19.1  | K.KDVDCAYLR.<br>K                       | Carbamidomethyl:<br>5                      |
|     |                  |      |        | 424 - 433 | 621.85  | 22.8  | R.RLLEGEEQR<br>L.C                      |                                            |
|     |                  |      |        | 142 - 151 | 631.38  | 27.8  | R.FLEQQNKLL<br>E.T                      |                                            |

|  |  |  |  |           |        |      |                                     |                                              |
|--|--|--|--|-----------|--------|------|-------------------------------------|----------------------------------------------|
|  |  |  |  | 336 - 340 | 633.35 | 16.5 | K.EEINE.L                           |                                              |
|  |  |  |  | 284 - 306 | 883.14 | 18.6 | R.DLNMDNIVA<br>EIKAHYDDIAS<br>RSR.A | Deamidated: 3                                |
|  |  |  |  | 425 - 448 | 883.73 | 18.9 | R.LLEGEEQRL<br>CEVGAVNVC<br>VSSSR.G | Carbamidomethyl:<br>10, 19;<br>Deamidated: 7 |
|  |  |  |  | 133 - 139 | 406.25 | 61.3 | R.FAAFIDK.V                         |                                              |
|  |  |  |  | 492 - 500 | 445.75 | 98.3 | R.VGGSILGCK.<br>K                   | Carbamidomethyl:<br>8                        |
|  |  |  |  | 142 - 148 | 453.78 | 35.3 | R.FLEQQNK.L                         |                                              |
|  |  |  |  | 413 - 424 | 473.95 | 67   | K.LGLDIEIATY<br>RR.L                |                                              |
|  |  |  |  | 258 - 264 | 476.29 | 47.5 | R.LYEEEEIR.V                        |                                              |
|  |  |  |  | 270 - 278 | 481.35 | 33.8 | H.ISDTSVIVK.M                       |                                              |
|  |  |  |  | 425 - 432 | 487.3  | 59.9 | R.LLEGEEQR.L                        |                                              |
|  |  |  |  | 348 - 356 | 487.78 | 48.9 | R.LTAEVENAK.<br>C                   |                                              |
|  |  |  |  | 210 - 217 | 504.82 | 56.5 | R.YEEEVALR.A                        |                                              |
|  |  |  |  | 230 - 237 | 506.27 | 45.7 | K.DVDCAYLR.K                        | Carbamidomethyl:<br>4                        |
|  |  |  |  | 307 - 314 | 506.29 | 57   | R.AEAESWYR.<br>S                    |                                              |
|  |  |  |  | 336 - 343 | 508.79 | 39.4 | K.EEINELNR.V                        |                                              |
|  |  |  |  | 348 - 361 | 531.28 | 40   | R.LTAEVENAK<br>CQNSK.L              | Carbamidomethyl:<br>10                       |
|  |  |  |  | 133 - 141 | 533.84 | 64.3 | R.FAAFIDKVR.<br>F                   |                                              |
|  |  |  |  | 384 - 393 | 536.33 | 87.2 | K.LAGLEEALQ<br>K.A                  |                                              |
|  |  |  |  | 439 - 448 | 539.74 | 37.6 | G.AVNVCVSSS<br>R.G                  | Carbamidomethyl:<br>5                        |
|  |  |  |  | 425 - 433 | 543.84 | 57.4 | R.LLEGEEQRL.<br>C                   |                                              |
|  |  |  |  | 54 - 64   | 545.79 | 82   | R.SVSALGSCG<br>PR.I                 | Carbamidomethyl:<br>8                        |
|  |  |  |  | 31 - 39   | 549.26 | 50.6 | R.CCISAAPYR.<br>G                   | Carbamidomethyl:<br>1, 2                     |
|  |  |  |  | 257 - 264 | 554.33 | 49.8 | R.RLYEEEEIR.V                       |                                              |
|  |  |  |  | 404 - 412 | 564.31 | 40.6 | K.EYQEVMSK<br>.L                    |                                              |
|  |  |  |  | 16 - 26   | 577.82 | 56.1 | R.TFSSCSAVA<br>PK.T                 | Carbamidomethyl:<br>5                        |
|  |  |  |  | 344 - 353 | 579.38 | 47.2 | R.VIQRLTAEVE<br>.N                  |                                              |
|  |  |  |  | 334 - 347 | 581.34 | 49.7 | R.TKEEINELNR<br>VIQR.L              |                                              |
|  |  |  |  | 209 - 217 | 582.84 | 56.1 | K.RYEEEVALR.<br>A                   |                                              |

|  |  |  |  |           |        |       |                                |                                            |
|--|--|--|--|-----------|--------|-------|--------------------------------|--------------------------------------------|
|  |  |  |  | 394 - 403 | 589.26 | 63    | K.AKQDMACLL<br>K.E             | Carbamidomethyl:<br>7                      |
|  |  |  |  | 433 - 443 | 589.32 | 32.4  | R.LCEGVGAVN<br>VC.V            | Carbamidomethyl:<br>2, 11                  |
|  |  |  |  | 218 - 228 | 596.87 | 76.3  | R.ATAENEFVA<br>LK.K            |                                            |
|  |  |  |  | 394 - 403 | 597.34 | 38.8  | K.AKQDMACLL<br>K.E             | Carbamidomethyl:<br>7; Oxidation: 5        |
|  |  |  |  | 181 - 191 | 597.76 | 83    | R.EAECAEADS<br>GR.L            | Carbamidomethyl:<br>4                      |
|  |  |  |  | 383 - 393 | 600.41 | 80.9  | C.KLAGLEEAL<br>QK.A            |                                            |
|  |  |  |  | 317 - 326 | 609.89 | 64.6  | K.CEEIKATVIR.<br>H             | Carbamidomethyl:<br>1                      |
|  |  |  |  | 307 - 316 | 613.82 | 54.5  | R.AEAESWYRS<br>K.C             |                                            |
|  |  |  |  | 334 - 343 | 623.35 | 61.2  | R.TKEEINELNR<br>.V             |                                            |
|  |  |  |  | 305 - 314 | 627.83 | 69.4  | R.SRAEAESWY<br>R.S             |                                            |
|  |  |  |  | 285 - 295 | 630.4  | 54.9  | D.LNMDNIVAEI<br>K.A            |                                            |
|  |  |  |  | 413 - 423 | 632.41 | 104.3 | K.LGLDIEIATY<br>R.R            |                                            |
|  |  |  |  | 384 - 395 | 635.91 | 73.9  | K.LAGLEEALQ<br>KAK.Q           |                                            |
|  |  |  |  | 218 - 229 | 660.86 | 81.7  | R.ATAENEFVA<br>LKK.D           |                                            |
|  |  |  |  | 382 - 393 | 680.44 | 75.9  | K.CKLAGLEEA<br>LQK.A           | Carbamidomethyl:<br>1                      |
|  |  |  |  | 284 - 295 | 687.92 | 96    | R.DLNMDNIVA<br>EIK.A           |                                            |
|  |  |  |  | 4 - 15    | 693.33 | 49.6  | R.SYRISPGYS<br>VTR.T           |                                            |
|  |  |  |  | 284 - 295 | 695.91 | 73.1  | R.DLNMDNIVA<br>EIK.A           | Oxidation: 4                               |
|  |  |  |  | 396 - 412 | 696.7  | 26.6  | K.QDMACLLKE<br>YQEVMSK.L       | Carbamidomethyl:<br>5; Deamidated: 1       |
|  |  |  |  | 284 - 295 | 696.89 | 34.7  | R.DLNMDNIVA<br>EIK.A           | Oxidation: 4;<br>Deamidated: 3, 6          |
|  |  |  |  | 108 - 119 | 700.9  | 54.2  | L.NLEIDPNAQC<br>VK.Q           | Carbamidomethyl:<br>10                     |
|  |  |  |  | 435 - 448 | 710.84 | 75.7  | C.EGVGAVNVC<br>VSSSR.G         | Carbamidomethyl:<br>9                      |
|  |  |  |  | 344 - 356 | 735.91 | 72.6  | R.VIQRLTAEVE<br>NAK.C          |                                            |
|  |  |  |  | 142 - 153 | 745.94 | 62.7  | R.FLEQQNKLL<br>ETK.L           |                                            |
|  |  |  |  | 265 - 278 | 755.48 | 73    | R.VLQAHISDTS<br>VIVK.M         |                                            |
|  |  |  |  | 478 - 491 | 761.86 | 54.9  | N.VVVGTS DVC<br>SPCSR.V        | Carbamidomethyl:<br>9, 12                  |
|  |  |  |  | 394 - 412 | 762.71 | 77.7  | K.AKQDMACLL<br>KEYQEVMSK.<br>L | Carbamidomethyl:<br>7                      |
|  |  |  |  | 161 - 179 | 772.98 | 26.3  | R.QCCESNLEP<br>LFSGYIETLR.R    | Carbamidomethyl:<br>2, 3; Deamidated:<br>6 |



|             |                  |      |       |           |         |       |                                          |                                                |
|-------------|------------------|------|-------|-----------|---------|-------|------------------------------------------|------------------------------------------------|
|             |                  |      |       | 449 - 456 | 776.34  | 26.6  | R.GGVVCGDL.<br>C                         | Carbamidomethyl:<br>5                          |
|             |                  |      |       | 238 - 257 | 783.12  | 74.4  | R.KSDLEANVE<br>ALIQETDFLRR.<br>L         |                                                |
|             |                  |      |       | 284 - 304 | 801.77  | 83.5  | R.DLNMDNIVA<br>EIKAHYDDIAS<br>R.S        |                                                |
|             |                  |      |       | 142 - 160 | 814.12  | 72.1  | R.FLEQQNKLL<br>ETKLQFYQNR.<br>Q          |                                                |
|             |                  |      |       | 258 - 278 | 814.8   | 46.6  | R.LYEEEEIRVLQ<br>AHISDTSVIVK.<br>M       |                                                |
|             |                  |      |       | 161 - 180 | 824.74  | 27.3  | R.QCCESNLEP<br>LFSGYIETLRR.<br>E         | Carbamidomethyl:<br>2, 3                       |
|             |                  |      |       | 433 - 448 | 847.42  | 126.7 | R.LCEGVGAVN<br>VCVSSSR.G                 | Carbamidomethyl:<br>2, 11                      |
|             |                  |      |       | 433 - 448 | 847.88  | 34.9  | R.LCEGVGAVN<br>VCVSSSR.G                 | Carbamidomethyl:<br>2, 11;<br>Deamidated: 9    |
|             |                  |      |       | 425 - 448 | 883.43  | 75.4  | R.LLEGEEQRL<br>CEGVGAVNVC<br>VSSSR.G     | Carbamidomethyl:<br>10, 19                     |
|             |                  |      |       | 364 - 381 | 886.95  | 43.7  | E.AAVTQAEQQ<br>GAAALADAK.C               | Deamidated: 5                                  |
|             |                  |      |       | 192 - 207 | 904.98  | 101.9 | R.LSSELNSLQ<br>EVLEGYK.K                 |                                                |
|             |                  |      |       | 192 - 207 | 905.49  | 92.3  | R.LSSELNSLQ<br>EVLEGYK.K                 | Deamidated: 6                                  |
|             |                  |      |       | 192 - 208 | 969.03  | 59.1  | R.LSSELNSLQ<br>EVLEGYK.K.R               |                                                |
|             |                  |      |       | 181 - 207 | 995.8   | 25.9  | R.EAEC AEADS<br>GRLSSELNSLQ<br>EVLEGYK.K | Carbamidomethyl:<br>4; Deamidated:<br>17       |
|             |                  |      |       | 362 - 381 | 1007.56 | 154.7 | K.LEAAVTQAE<br>QQGAAALADA<br>K.C         |                                                |
|             |                  |      |       | 239 - 256 | 1032.01 | 118.2 | K.SDLEANVEA<br>LIQETDFLR.R               |                                                |
| KAP11.<br>1 | gij9990000<br>18 | 16.7 | 933.5 | 145 - 156 | 511.56  | 21.2  | R.TYQQSCVSS<br>CRR.I                     | Carbamidomethyl:<br>6, 10;<br>Deamidated: 4    |
|             |                  |      |       | 145 - 156 | 511.19  | 28.5  | R.TYQQSCVSS<br>CRR.I                     | Carbamidomethyl:<br>6, 10                      |
|             |                  |      |       | 145 - 156 | 511.9   | 27.6  | R.TYQQSCVSS<br>CRR.I                     | Carbamidomethyl:<br>6, 10;<br>Deamidated: 3, 4 |
|             |                  |      |       | 121 - 132 | 602.35  | 36.4  | R.SISTVCQPV<br>GGV.S                     | Carbamidomethyl:<br>6                          |
|             |                  |      |       | 145 - 155 | 688.31  | 77.3  | R.TYQQSCVSS<br>CR.R                      | Carbamidomethyl:<br>6, 10                      |
|             |                  |      |       | 145 - 155 | 688.76  | 79.5  | R.TYQQSCVSS<br>CR.R                      | Carbamidomethyl:<br>6, 10;<br>Deamidated: 3    |
|             |                  |      |       | 145 - 155 | 688.81  | 66.4  | R.TYQQSCVSS<br>CR.R                      | Carbamidomethyl:<br>6, 10;<br>Deamidated: 4    |

|             |                  |      |       |           |         |       |                                      |                                                  |
|-------------|------------------|------|-------|-----------|---------|-------|--------------------------------------|--------------------------------------------------|
|             |                  |      |       | 145 - 155 | 689.29  | 76.6  | R.TYQQSCVSS<br>CR.R                  | Carbamidomethyl:<br>6, 10;<br>Deamidated: 3, 4   |
|             |                  |      |       | 121 - 135 | 752.91  | 59.1  | R.SISTVCQPV<br>GGVSTI.C              | Carbamidomethyl:<br>6                            |
|             |                  |      |       | 121 - 144 | 850.73  | 86.4  | R.SISTVCQPV<br>GGVSTICQPTC<br>GVSR.T | Carbamidomethyl:<br>6, 16, 20                    |
|             |                  |      |       | 121 - 144 | 851.09  | 34.3  | R.SISTVCQPV<br>GGVSTICQPTC<br>GVSR.T | Carbamidomethyl:<br>6, 16, 20;<br>Deamidated: 17 |
|             |                  |      |       | 64 - 78   | 869.87  | 65.8  | Q.STCYQPTPC<br>VSSPVR.V              | Carbamidomethyl:<br>3, 9                         |
|             |                  |      |       | 13 - 29   | 888.45  | 54.4  | R.RIGGEYTPV<br>VTVSSPD.A             |                                                  |
|             |                  |      |       | 14 - 31   | 903.47  | 43.5  | R.IGGEYTPV<br>VTVSSPDAD.C            |                                                  |
|             |                  |      |       | 13 - 31   | 981.48  | 80    | R.RIGGEYTPV<br>VTVSSPDAD.<br>C       |                                                  |
|             |                  |      |       | 121 - 139 | 995.99  | 96.4  | R.SISTVCQPV<br>GGVSTICQPT.<br>C      | Carbamidomethyl:<br>6, 16                        |
| KAP13.<br>1 | gij9990000<br>30 | 17.4 | 511.9 | 148 - 159 | 634.76  | 19.4  | R.SGQSLSFQP<br>TCG.S                 | Carbamidomethyl:<br>11                           |
|             |                  |      |       | 148 - 163 | 862.41  | 49.8  | R.SGQSLSFQP<br>TCGSGFY.-             | Carbamidomethyl:<br>11; Deamidated:<br>8         |
|             |                  |      |       | 136 - 144 | 576.32  | 49.3  | R.SSFYRPTFF.<br>S                    |                                                  |
|             |                  |      |       | 136 - 145 | 619.82  | 27.6  | R.SSFYRPTFF<br>S.S                   |                                                  |
|             |                  |      |       | 63 - 79   | 676.32  | 27    | R.TQTVVSSPC<br>QTSCYRPR.T            | Carbamidomethyl:<br>9, 13                        |
|             |                  |      |       | 136 - 147 | 741.39  | 31.3  | R.SSFYRPTFF<br>SSR.S                 |                                                  |
|             |                  |      |       | 148 - 163 | 861.91  | 89.2  | R.SGQSLSFQP<br>TCGSGFY.-             | Carbamidomethyl:<br>11                           |
|             |                  |      |       | 148 - 163 | 862.42  | 104.8 | R.SGQSLSFQP<br>TCGSGFY.-             | Carbamidomethyl:<br>11; Deamidated:<br>3         |
|             |                  |      |       | 20 - 36   | 934.46  | 105   | R.YSGSSCGSS<br>FPSNLVYR.T            | Carbamidomethyl:<br>6                            |
|             |                  |      |       | 20 - 36   | 934.91  | 58.2  | R.YSGSSCGSS<br>FPSNLVYR.T            | Carbamidomethyl:<br>6; Deamidated:<br>13         |
| KAP15.<br>1 | gij9990000<br>32 | 14.6 | 216.6 | 1 - 12    | 682.78  | 22.7  | -<br>.SFNCSTGNFS<br>RS.L             | Carbamidomethyl:<br>4; Deamidated: 8             |
|             |                  |      |       | 68 - 82   | 958.41  | 104.4 | R.FFQTSCSHP<br>QNFIFR.S              | Carbamidomethyl:<br>6                            |
|             |                  |      |       | 68 - 82   | 959     | 89.5  | R.FFQTSCSHP<br>QNFIFR.S              | Carbamidomethyl:<br>6; Deamidated: 3             |
| KAP16.<br>2 | gij9990000<br>35 | 6    | 130.2 | 1 - 19    | 1063.95 | 130.5 | -<br>.SYYYGNYYGG<br>LGYGLGGFR.G      |                                                  |
| KAP19.      | gij9990000       | 7.6  | 350.9 | 25 - 32   | 450.68  | 39.1  | R.GCGCGSFR.                          | Carbamidomethyl:                                 |

|                     |                  |      |       |         |         |       |                                                 |                                               |
|---------------------|------------------|------|-------|---------|---------|-------|-------------------------------------------------|-----------------------------------------------|
| 3                   | 16               |      |       |         |         |       | R                                               | 2, 4                                          |
|                     |                  |      |       | 9 - 24  | 767.92  | 99.4  | S.GLGYGYGGF<br>GGLGFGR.G                        |                                               |
|                     |                  |      |       | 59 - 72 | 831.42  | 54.6  | R.CPSSFGRYG<br>FSSFY.-                          | Carbamidomethyl:<br>1                         |
|                     |                  |      |       | 33 - 58 | 910.05  | 68.5  | R.RLGFSTGFG<br>GYGCGSGFGS<br>FGYGYNR.C          | Carbamidomethyl:<br>13                        |
|                     |                  |      |       | 34 - 65 | 1122.14 | 88.5  | R.LGFSTGFGG<br>YGCGSGGFSF<br>GYGYNRCPS<br>FGR.Y | Carbamidomethyl:<br>12, 26;<br>Deamidated: 24 |
| KAP19.<br>5         | gij9990000<br>15 | 7.7  | 319.1 | 34 - 49 | 566.25  | 28.1  | R.LGCGSGFRG<br>YGCDGSGF.G                       | Carbamidomethyl:<br>3, 12                     |
|                     |                  |      |       | 34 - 41 | 427.23  | 57.8  | R.LGCGSGFR.<br>G                                | Carbamidomethyl:<br>3                         |
|                     |                  |      |       | 25 - 32 | 450.68  | 39.1  | R.GCGCGSFR.<br>R                                | Carbamidomethyl:<br>2, 4                      |
|                     |                  |      |       | 65 - 72 | 512.26  | 34.3  | R.RCGFSSFY.-                                    | Carbamidomethyl:<br>2                         |
|                     |                  |      |       | 9 - 24  | 767.92  | 99.4  | R.GLGYGYGGF<br>GGLGFGR.G                        |                                               |
|                     |                  |      |       | 42 - 64 | 876.71  | 60.4  | R.GYGCDSGF<br>GSFGSGCCHR<br>PLFFR.R             | Carbamidomethyl:<br>4, 15, 16                 |
| KAP24.<br>1 Partial | gij9990000<br>55 | 21   | 155.8 | 39 - 61 | 852.11  | 26.5  | R.HVSPTFGLS<br>LPSSYHGNLW<br>LLDN.C             |                                               |
|                     |                  |      |       | 23 - 38 | 929.46  | 100.7 | R.THYYFPVTG<br>SVALCSR.H                        | Carbamidomethyl:<br>14                        |
|                     |                  |      |       | 39 - 64 | 991.47  | 28.7  | R.HVSPTFGLS<br>LPSSYHGNLW<br>LLDNCQE.T          | Carbamidomethyl:<br>24; Deamidated:<br>25     |
| KAP26.<br>1         | gij9990000<br>54 | 19.2 | 92.5  | 50 - 60 | 654.82  | 27.4  | R.TWILSNGQE<br>TC.S                             | Carbamidomethyl:<br>11                        |
|                     |                  |      |       | 5 - 16  | 695.82  | 65.1  | N.YCSGNYTLG<br>SLR.S                            | Carbamidomethyl:<br>2                         |
| KAP3.4              | gij9990000<br>31 | 10.4 | 297.1 | 13 - 23 | 590.79  | 15.7  | T.TPATTICSSD<br>K.F                             | Carbamidomethyl:<br>7                         |
|                     |                  |      |       | 27 - 45 | 1131    | 38.3  | R.CGVCLPSTC<br>PHTVWFLEPT.<br>C                 | Carbamidomethyl:<br>1, 4, 9                   |
|                     |                  |      |       | 27 - 37 | 644.28  | 61.4  | R.CGVCLPSTC<br>PH.T                             | Carbamidomethyl:<br>1, 4, 9                   |
|                     |                  |      |       | 15 - 26 | 723.3   | 46.6  | P.ATTICSSDKF<br>CR.C                            | Carbamidomethyl:<br>5, 11                     |
|                     |                  |      |       | 13 - 26 | 822.38  | 29.6  | T.TPATTICSSD<br>KFCR.C                          | Carbamidomethyl:<br>7, 13                     |
|                     |                  |      |       | 27 - 40 | 837.39  | 53.8  | R.CGVCLPSTC<br>PHTVW.F                          | Carbamidomethyl:<br>1, 4, 9                   |
|                     |                  |      |       | 12 - 26 | 872.83  | 51.7  | P.TTPATTICSS<br>DKFCR.C                         | Carbamidomethyl:<br>8, 14                     |
| KAP6.1              | gij9990000       | 8.3  | 703.4 | 21 - 35 | 566.25  | 41    | G.LGCGYGSCY<br>GSGFRR.L                         | Carbamidomethyl:<br>3, 8                      |

|                |                  |     |       |         |         |       |                                  |                          |
|----------------|------------------|-----|-------|---------|---------|-------|----------------------------------|--------------------------|
|                | 21               |     |       |         |         |       |                                  |                          |
|                |                  |     |       | 40 - 49 | 570.24  | 62.5  | G.YGCGYGYG<br>SR.S               | Carbamidomethyl:<br>3    |
|                |                  |     |       | 39 - 49 | 598.73  | 53.5  | C.GYGCGYGY<br>GSR.S              | Carbamidomethyl:<br>4    |
|                |                  |     |       | 50 - 61 | 632.25  | 92.7  | R.SLCGSYGYG<br>GSR.S             | Carbamidomethyl:<br>3    |
|                |                  |     |       | 70 - 82 | 719.31  | 49.2  | G.CGSGYGSG<br>FGYYY.-            | Carbamidomethyl:<br>1    |
|                |                  |     |       | 43 - 49 | 759.29  | 29.6  | C.GYGYGSR.S                      |                          |
|                |                  |     |       | 36 - 49 | 763.8   | 88.8  | R.LGCGYGCG<br>YGYGSR.S           | Carbamidomethyl:<br>3, 7 |
|                |                  |     |       | 21 - 34 | 770.84  | 102.2 | G.LGCGYGSCY<br>GSGFR.R           | Carbamidomethyl:<br>3, 8 |
|                |                  |     |       | 47 - 61 | 782.31  | 42.5  | Y.GSRSLCGSG<br>YGYGSR.S          | Carbamidomethyl:<br>6    |
|                |                  |     |       | 35 - 49 | 841.81  | 61.6  | R.RLGCYGYC<br>GYGYGSR.S          | Carbamidomethyl:<br>4, 8 |
|                |                  |     |       | 62 - 82 | 1109.93 | 79.7  | R.SLCGSYGYC<br>GSGYGSFGY<br>YY.- | Carbamidomethyl:<br>3, 9 |
| KAP6.3         | gij9990000<br>20 | 8.3 | 617   | 50 - 64 | 817.36  | 19.4  | R.SLCGSYGYC<br>GSRPLY.G          | Carbamidomethyl:<br>3, 9 |
|                |                  |     |       | 21 - 35 | 566.25  | 41    | G.LGCGYGSCY<br>GSGFRR.L          | Carbamidomethyl:<br>3, 8 |
|                |                  |     |       | 40 - 49 | 570.24  | 62.5  | G.YGCGYGYG<br>SR.S               | Carbamidomethyl:<br>3    |
|                |                  |     |       | 39 - 49 | 598.73  | 53.5  | C.GYGCGYGY<br>GSR.S              | Carbamidomethyl:<br>4    |
|                |                  |     |       | 50 - 61 | 630.76  | 49.9  | R.SLCGSYGYC<br>GSR.P             | Carbamidomethyl:<br>3, 9 |
|                |                  |     |       | 70 - 82 | 719.31  | 49.2  | G.CGSGYGSG<br>FGYYY.-            | Carbamidomethyl:<br>1    |
|                |                  |     |       | 43 - 49 | 759.29  | 29.6  | C.GYGYGSR.S                      |                          |
|                |                  |     |       | 36 - 49 | 763.8   | 88.8  | R.LGCGYGCG<br>YGYGSR.S           | Carbamidomethyl:<br>3, 7 |
|                |                  |     |       | 21 - 34 | 770.84  | 102.2 | G.LGCGYGSCY<br>GSGFR.R           | Carbamidomethyl:<br>3, 8 |
|                |                  |     |       | 35 - 49 | 841.81  | 61.6  | R.RLGCYGYC<br>GYGYGSR.S          | Carbamidomethyl:<br>4, 8 |
|                |                  |     |       | 50 - 65 | 845.9   | 59.2  | R.SLCGSYGYC<br>GSRPLY.G.C        | Carbamidomethyl:<br>3, 9 |
| KAP6.3<br>var1 | gij9990000<br>19 | 7.1 | 561.2 | 21 - 35 | 566.25  | 41    | G.LGCGYGSCY<br>GSGFRR.L          | Carbamidomethyl:<br>3, 8 |
|                |                  |     |       | 40 - 49 | 570.24  | 62.5  | G.YGCGYGYG<br>SR.S               | Carbamidomethyl:<br>3    |
|                |                  |     |       | 39 - 49 | 598.73  | 53.5  | C.GYGCGYGY<br>GSR.S              | Carbamidomethyl:<br>4    |
|                |                  |     |       | 58 - 70 | 719.31  | 49.2  | G.CGSGYGSG<br>FGYYY.-            | Carbamidomethyl:<br>1    |
|                |                  |     |       | 43 - 49 | 759.29  | 29.6  | C.GYGYGSR.S                      |                          |

|                 |                  |      |       |           |         |       |                                    |                                               |
|-----------------|------------------|------|-------|-----------|---------|-------|------------------------------------|-----------------------------------------------|
|                 |                  |      |       | 36 - 49   | 763.8   | 88.8  | R.LGCGYGCG<br>YGYGSR.S             | Carbamidomethyl:<br>3, 7                      |
|                 |                  |      |       | 21 - 34   | 770.84  | 102.2 | G.LGCGYGSCY<br>GSGFR.R             | Carbamidomethyl:<br>3, 8                      |
|                 |                  |      |       | 35 - 49   | 841.81  | 61.6  | R.RLGCGYGC<br>GYGYGSR.S            | Carbamidomethyl:<br>4, 8                      |
|                 |                  |      |       | 50 - 70   | 1147.94 | 72.7  | R.SLYGCGYGC<br>GSGYGSGFGY<br>YY.-  | Carbamidomethyl:<br>5, 9                      |
| KAP9.2          | gij9990000<br>72 | 30.4 | 619.9 | 236 - 241 | 389.68  | 23.8  | R.TCYHPT.C                         | Carbamidomethyl:<br>2                         |
|                 |                  |      |       | 155 - 161 | 409.76  | 33.9  | R.TTCLKPV.C                        | Carbamidomethyl:<br>3                         |
|                 |                  |      |       | 236 - 242 | 469.7   | 32.6  | R.TCYHPTC.C                        | Carbamidomethyl:<br>2, 7                      |
|                 |                  |      |       | 155 - 165 | 626.33  | 39.9  | R.TTCLKPVCA<br>TT.C                | Carbamidomethyl:<br>3, 8                      |
|                 |                  |      |       | 28 - 37   | 671.21  | 59.6  | C.YQTSEHTCC<br>R.T                 | Carbamidomethyl:<br>8, 9                      |
|                 |                  |      |       | 264 - 273 | 671.21  | 51.5  | R.PVCCQTTCC<br>R.T                 | Carbamidomethyl:<br>3, 4, 8, 9                |
|                 |                  |      |       | 21 - 37   | 738.66  | 60    | R.PCCPPTCYQ<br>TSEHTCCR.T          | Carbamidomethyl:<br>2, 3, 7, 15, 16           |
|                 |                  |      |       | 236 - 247 | 763.28  | 34.8  | R.TCYHPTCCC<br>LPG.C               | Carbamidomethyl:<br>2, 7, 8, 9                |
|                 |                  |      |       | 236 - 248 | 843.29  | 48.3  | R.TCYHPTCCC<br>LPGC.Q              | Carbamidomethyl:<br>2, 7, 8, 9, 13            |
|                 |                  |      |       | 236 - 257 | 884.32  | 41.2  | R.TCYHPTCCC<br>LPGCQAQSCG<br>SSC.C | Carbamidomethyl:<br>2, 7, 8, 9, 13, 18,<br>22 |
|                 |                  |      |       | 38 - 53   | 936.36  | 42.8  | R.TTCSKPTCV<br>TTCCQPA.C           | Carbamidomethyl:<br>3, 8, 12, 13              |
|                 |                  |      |       | 277 - 291 | 952.83  | 75.7  | R.CRPSCVSSC<br>CQPSCC.-            | Carbamidomethyl:<br>1, 5, 9, 10, 14, 15       |
|                 |                  |      |       | 236 - 251 | 1006.87 | 46.9  | R.TCYHPTCCC<br>LPGCQAQ.S           | Carbamidomethyl:<br>2, 7, 8, 9, 13            |
|                 |                  |      |       | 236 - 252 | 1050.39 | 28.8  | R.TCYHPTCCC<br>LPGCQAQS.C          | Carbamidomethyl:<br>2, 7, 8, 9, 13            |
| KAP9.2-<br>like | gij9990000<br>57 | 20.6 | 459.7 | 140 - 145 | 395.7   | 28.8  | R.ICYHPT.C                         | Carbamidomethyl:<br>2                         |
|                 |                  |      |       | 9 - 15    | 489.23  | 18.1  | R.CQPPCCR.T                        | Carbamidomethyl:<br>1, 5, 6                   |
|                 |                  |      |       | 140 - 146 | 475.73  | 40.3  | R.ICYHPTC.C                        | Carbamidomethyl:<br>2, 7                      |
|                 |                  |      |       | 140 - 147 | 555.75  | 74.4  | R.ICYHPTCC.C                       | Carbamidomethyl:<br>2, 7, 8                   |
|                 |                  |      |       | 31 - 39   | 623.69  | 48.7  | R.TCCQTTCCR<br>.T                  | Carbamidomethyl:<br>2, 3, 7, 8                |
|                 |                  |      |       | 168 - 177 | 671.21  | 51.5  | R.PVCCQTTCC<br>R.T                 | Carbamidomethyl:<br>3, 4, 8, 9                |
|                 |                  |      |       | 140 - 151 | 769.33  | 34.7  | R.ICYHPTCCCL<br>PG.C               | Carbamidomethyl:<br>2, 7, 8, 9                |
|                 |                  |      |       | 140 - 152 | 849.36  | 42.6  | R.ICYHPTCCCL<br>PGC.Q              | Carbamidomethyl:<br>2, 7, 8, 9, 13            |
|                 |                  |      |       | 178 - 194 | 1070.37 | 79    | R.TTCCRPSCV<br>STCCPSFC.-          | Carbamidomethyl:<br>3, 4, 8, 12, 13, 17       |

|        |                  |      |        |           |        |       |                                   |                                                                   |
|--------|------------------|------|--------|-----------|--------|-------|-----------------------------------|-------------------------------------------------------------------|
|        |                  |      |        | 140 - 156 | 1077.4 | 41.5  | R.ICYHPTCCCL<br>PGCQAQE.C         | Carbamidomethyl:<br>2, 7, 8, 9, 13                                |
| KAP4.9 | gij9990001<br>25 | 17.2 | 340.9  | 17 - 35   | 842.29 | 17.9  | R.SLCQETCCR<br>PSCCQTTCR.<br>T    | Carbamidomethyl:<br>3, 7, 8, 12, 13, 17,<br>18; Deamidated:<br>14 |
|        |                  |      |        | 109 - 117 | 563.76 | 54.2  | R.ISSCCRPSC.<br>C                 | Carbamidomethyl:<br>4, 5, 9                                       |
|        |                  |      |        | 6 - 16    | 606.72 | 47.6  | C.GSVCSQSC<br>GR.S                | Carbamidomethyl:<br>4, 9                                          |
|        |                  |      |        | 36 - 47   | 687.8  | 38.9  | R.TTCYRPSCG<br>VSS.C              | Carbamidomethyl:<br>3, 8                                          |
|        |                  |      |        | 17 - 35   | 841.96 | 47.8  | R.SLCQETCCR<br>PSCCQTTCR.<br>T    | Carbamidomethyl:<br>3, 7, 8, 12, 13, 17,<br>18                    |
|        |                  |      |        | 17 - 35   | 842.28 | 47    | R.SLCQETCCR<br>PSCCQTTCR.<br>T    | Carbamidomethyl:<br>3, 7, 8, 12, 13, 17,<br>18; Deamidated:<br>4  |
|        |                  |      |        | 96 - 108  | 854.83 | 105.4 | R.CCQPVCCQ<br>PSCPR.I             | Carbamidomethyl:<br>1, 2, 6, 7, 11                                |
| K10    | gij9990000<br>82 | 56.3 | 301.5  | 160 - 166 | 498.27 | 27.8  | K.IKEWYEK.H                       |                                                                   |
|        |                  |      |        | 305 - 314 | 606.31 | 19.9  | R.SQYEQLAEK<br>N.R                | Deamidated: 5,<br>10                                              |
|        |                  |      |        | 197 - 217 | 782.42 | 16.2  | T.TDNANILIQV<br>DNARLAADDF<br>R.M |                                                                   |
|        |                  |      |        | 202 - 217 | 915.99 | 32.4  | N.ILIQVDNARL<br>AADDFR.M          | Deamidated: 7                                                     |
|        |                  |      |        | 211 - 217 | 404.25 | 53.8  | R.LAADDFR.M                       |                                                                   |
|        |                  |      |        | 240 - 248 | 516.29 | 64.2  | R.VLDELTLTK.<br>T                 |                                                                   |
|        |                  |      |        | 424 - 432 | 583.35 | 40.4  | R.LENEIQTYR.<br>S                 |                                                                   |
|        |                  |      |        | 422 - 432 | 717.89 | 46.9  | K.IRLENEIQTY<br>R.S               |                                                                   |
| K31    | gij1646528<br>64 | 46.8 | 4848.6 | 127 - 135 | 500.83 | 40    | R.LVVQIDNAK.<br>L                 | Deamidated: 4                                                     |
|        |                  |      |        | 136 - 144 | 518.83 | 37.9  | K.LAADDFRTK.<br>Y                 |                                                                   |
|        |                  |      |        | 349 - 357 | 599.81 | 24    | R.LECEINTYR.<br>G                 | Carbamidomethyl:<br>3; Deamidated: 6                              |
|        |                  |      |        | 232 - 241 | 625.84 | 24.5  | Q.YEALVETNR<br>R.D                |                                                                   |
|        |                  |      |        | 230 - 241 | 725.89 | 17.4  | R.AQYEALVET<br>NRR.D              | Deamidated: 2                                                     |
|        |                  |      |        | 123 - 135 | 735.91 | 31.7  | S.ENARLVVQID<br>NAK.L             | Deamidated: 8                                                     |
|        |                  |      |        | 329 - 346 | 744.4  | 18.4  | I.RGDLERQNQ<br>EYQVLLDVR.A        |                                                                   |
|        |                  |      |        | 281 - 293 | 761.41 | 22.1  | N.ALEVELQAQ<br>HNLR.D             | Deamidated: 7                                                     |
|        |                  |      |        | 145 - 164 | 787.78 | 20.6  | K.YETELGLRQ<br>LVESDINGLRR.       |                                                                   |

|  |  |  |  |           |        |      |                                                 |                                           |
|--|--|--|--|-----------|--------|------|-------------------------------------------------|-------------------------------------------|
|  |  |  |  |           |        |      | I                                               |                                           |
|  |  |  |  | 256 - 276 | 821.8  | 15.6 | N.KQVVSSSEQ<br>LQSCQTEIIELR<br>.R               | Carbamidomethyl:<br>13; Deamidated:<br>11 |
|  |  |  |  | 278 - 302 | 946.81 | 15.2 | R.TVNALEVEL<br>QAQHNLRD<br>SL<br>ENTLTE.T       | Deamidated: 3                             |
|  |  |  |  | 203 - 229 | 998.87 | 22.1 | R.SQLGDR<br>LNV<br>EVDAAPT<br>VDLN<br>RVLNETR.A |                                           |
|  |  |  |  | 341 - 346 | 357.77 | 49   | Q.VLLDVR.A                                      |                                           |
|  |  |  |  | 224 - 229 | 366.19 | 30.3 | R.VLNETR.A                                      |                                           |
|  |  |  |  | 136 - 142 | 404.25 | 53.8 | K.LAADDFR.T                                     |                                           |
|  |  |  |  | 323 - 329 | 408.76 | 50.8 | E.SQLAEIR.G                                     |                                           |
|  |  |  |  | 67 - 73   | 412.23 | 53.8 | R.LASYLEK.V                                     |                                           |
|  |  |  |  | 7 - 13    | 423.79 | 50.6 | C.LPNLSFR.S                                     |                                           |
|  |  |  |  | 153 - 164 | 467.28 | 34.4 | R.QLVESDINGL<br>RR.I                            |                                           |
|  |  |  |  | 80 - 87   | 474.27 | 44.7 | R.ENAELESR.I                                    |                                           |
|  |  |  |  | 230 - 241 | 483.94 | 57.3 | R.AQYEALVET<br>NRR.D                            |                                           |
|  |  |  |  | 109 - 116 | 494.81 | 70   | R.TIEELQQK.I                                    |                                           |
|  |  |  |  | 127 - 135 | 500.36 | 71.6 | R.LVVQIDNAK.<br>L                               |                                           |
|  |  |  |  | 127 - 135 | 500.83 | 49.4 | R.LVVQIDNAK.<br>L                               | Deamidated: 7                             |
|  |  |  |  | 59 - 66   | 512.82 | 36.4 | E.TMQFLNDR.L                                    |                                           |
|  |  |  |  | 358 - 366 | 518.78 | 45.4 | R.GLLDSEDCK.<br>L                               | Carbamidomethyl:<br>8                     |
|  |  |  |  | 165 - 173 | 552.82 | 74.2 | R.ILDELTLCK.S                                   | Carbamidomethyl:<br>8                     |
|  |  |  |  | 242 - 249 | 555.32 | 53.1 | R.DVEEWYIR.Q                                    |                                           |
|  |  |  |  | 405 - 413 | 556.74 | 65.4 | R.CGPCNSYVR<br>.-                               | Carbamidomethyl:<br>1, 4                  |
|  |  |  |  | 58 - 66   | 577.32 | 62.8 | K.ETMQFLNDR<br>.L                               |                                           |
|  |  |  |  | 5 - 13    | 577.36 | 37   | N.FCLPNLSFR.<br>S                               | Carbamidomethyl:<br>2                     |
|  |  |  |  | 58 - 66   | 577.83 | 32.8 | K.ETMQFLNDR<br>.L                               | Deamidated: 4                             |
|  |  |  |  | 58 - 66   | 585.29 | 58.5 | K.ETMQFLNDR<br>.L                               | Oxidation: 3                              |
|  |  |  |  | 58 - 66   | 585.78 | 34.4 | K.ETMQFLNDR<br>.L                               | Oxidation: 3;<br>Deamidated: 4            |
|  |  |  |  | 213 - 223 | 585.86 | 45.8 | E.VDAAPTVDL<br>NR.V                             |                                           |
|  |  |  |  | 109 - 123 | 597.35 | 31.6 | R.TIEELQQKIL<br>CAKSE.N                         | Carbamidomethyl:<br>11                    |

|  |  |  |  |           |        |       |                            |                                          |
|--|--|--|--|-----------|--------|-------|----------------------------|------------------------------------------|
|  |  |  |  | 349 - 357 | 599.31 | 69.2  | R.LECEINTYR.<br>G          | Carbamidomethyl:<br>3                    |
|  |  |  |  | 143 - 152 | 605.37 | 72    | R.TKYETELGL<br>R.Q         |                                          |
|  |  |  |  | 174 - 184 | 609.86 | 84    | K.SDLEAQVES<br>LK.E        |                                          |
|  |  |  |  | 182 - 191 | 616.9  | 27.3  | E.SLKEELICK.<br>S          | Carbamidomethyl:<br>8                    |
|  |  |  |  | 153 - 163 | 622.86 | 31.4  | R.QLVESDINGL<br>R.R        | Deamidated: 8                            |
|  |  |  |  | 164 - 173 | 630.92 | 40    | R.RILDELTLCK.<br>S         | Carbamidomethyl:<br>9                    |
|  |  |  |  | 4 - 13    | 634.3  | 39.1  | F.NFCLPNLSF<br>R.S         | Carbamidomethyl:<br>3                    |
|  |  |  |  | 47 - 57   | 644.82 | 49.6  | W.FCEGSFNG<br>NEK.E        | Carbamidomethyl:<br>2                    |
|  |  |  |  | 230 - 240 | 647.36 | 79.3  | R.AQYEALVET<br>NR.R        |                                          |
|  |  |  |  | 92 - 102  | 650.34 | 39.6  | R.SQQQEPLVC<br>PN.Y        | Carbamidomethyl:<br>9                    |
|  |  |  |  | 76 - 91   | 662.4  | 30.8  | R.QLERENAEL<br>ESRILER.S   |                                          |
|  |  |  |  | 136 - 152 | 666.73 | 34.9  | K.LAADDFRTK<br>YETELGLR.Q  |                                          |
|  |  |  |  | 283 - 293 | 668.9  | 50.2  | L.EVELQAQHN<br>LR.D        |                                          |
|  |  |  |  | 203 - 214 | 672.89 | 31.6  | R.SQLGDRLNV<br>EVD.A       |                                          |
|  |  |  |  | 127 - 144 | 673.09 | 47.8  | R.LVVQIDNAKL<br>AADDFRTK.Y |                                          |
|  |  |  |  | 295 - 306 | 682.37 | 78.8  | D.SLENTLTETE<br>AR.Y       |                                          |
|  |  |  |  | 323 - 334 | 693.9  | 35.9  | E.SQLAEIRGDL<br>ER.Q       |                                          |
|  |  |  |  | 174 - 191 | 702.37 | 43.1  | K.SDLEAQVES<br>LKEELICK.S  | Carbamidomethyl:<br>16; Deamidated:<br>6 |
|  |  |  |  | 109 - 126 | 711.08 | 77.7  | R.TIEELQQKIL<br>CAKSENAR.L | Carbamidomethyl:<br>11                   |
|  |  |  |  | 347 - 357 | 712.85 | 55.8  | R.ARLECEINTY<br>R.G        | Carbamidomethyl:<br>5                    |
|  |  |  |  | 229 - 240 | 725.37 | 49.5  | T.RAQYEALVE<br>TNR.R       |                                          |
|  |  |  |  | 180 - 191 | 730.95 | 76.7  | Q.VESLKEELIC<br>LK.S       | Carbamidomethyl:<br>10                   |
|  |  |  |  | 76 - 87   | 737.36 | 37.5  | R.QLERENAEL<br>ESR.I       |                                          |
|  |  |  |  | 58 - 75   | 738.41 | 55.1  | K.ETMQFLNDR<br>LASYLEKVR.Q |                                          |
|  |  |  |  | 294 - 306 | 739.89 | 103.6 | R.DSLENTLTET<br>EAR.Y      |                                          |
|  |  |  |  | 294 - 306 | 740.35 | 83.9  | R.DSLENTLTET<br>EAR.Y      | Deamidated: 5                            |
|  |  |  |  | 2 - 13    | 751.39 | 61.6  | M.SFNFLPNL<br>SFR.S        | Carbamidomethyl:<br>5                    |
|  |  |  |  | 2 - 13    | 751.89 | 54.8  | M.SFNFLPNL<br>SFR.S        | Carbamidomethyl:<br>5; Deamidated: 3     |



|  |  |  |  |           |         |       |                                                |                                   |
|--|--|--|--|-----------|---------|-------|------------------------------------------------|-----------------------------------|
|  |  |  |  | 335 - 346 | 752.95  | 94.3  | R.QNQEQVLL<br>DVR.A                            |                                   |
|  |  |  |  | 335 - 346 | 753.44  | 54.7  | R.QNQEQVLL<br>DVR.A                            | Deamidated: 3                     |
|  |  |  |  | 203 - 223 | 761.43  | 76.6  | R.SQLGDRNLV<br>EVDAAPTVDLN<br>R.V              |                                   |
|  |  |  |  | 209 - 229 | 780.12  | 53.5  | R.LNVEVDAAP<br>TVDLNRVLNET<br>R.A              |                                   |
|  |  |  |  | 122 - 142 | 782.42  | 71.3  | K.SENARLVVQI<br>DNAKLAADDF<br>R.T              |                                   |
|  |  |  |  | 109 - 121 | 787.44  | 74.1  | R.TIEELQQKIL<br>CAK.S                          | Carbamidomethyl:<br>11            |
|  |  |  |  | 381 - 402 | 805.04  | 47    | K.TITPCISSPC<br>APAAPCTPCVP<br>R.S             | Carbamidomethyl:<br>5, 10, 16, 19 |
|  |  |  |  | 209 - 223 | 813.48  | 88    | R.LNVEVDAAP<br>TVDLNR.V                        |                                   |
|  |  |  |  | 209 - 223 | 813.98  | 29.2  | R.LNVEVDAAP<br>TVDLNR.V                        | Deamidated: 14                    |
|  |  |  |  | 257 - 277 | 830.75  | 62.7  | K.QVVSSEQL<br>QSCQTEIILR<br>R.T                | Carbamidomethyl:<br>12            |
|  |  |  |  | 174 - 188 | 852.01  | 26.5  | K.SDLEAQVES<br>LKEELI.C                        |                                   |
|  |  |  |  | 74 - 87   | 864.93  | 60.8  | K.VRQLERENA<br>ELESR.I                         |                                   |
|  |  |  |  | 88 - 108  | 885.79  | 77.8  | R.ILERSQQQE<br>PLVCPNYQSYF<br>R.T              | Carbamidomethyl:<br>13            |
|  |  |  |  | 307 - 329 | 893.83  | 47.4  | R.YSCQLNQVQ<br>SLISNVESQLA<br>EIR.G            | Carbamidomethyl:<br>3             |
|  |  |  |  | 127 - 142 | 894.51  | 119.9 | R.LVVQIDNAKL<br>AADDFR.T                       |                                   |
|  |  |  |  | 127 - 142 | 895.03  | 78.6  | R.LVVQIDNAKL<br>AADDFR.T                       | Deamidated: 4                     |
|  |  |  |  | 278 - 293 | 918.03  | 119.9 | R.TVNALEVEL<br>QAQHNL.R.D                      |                                   |
|  |  |  |  | 278 - 293 | 918.49  | 102.4 | R.TVNALEVEL<br>QAQHNL.R.D                      | Deamidated: 10                    |
|  |  |  |  | 278 - 293 | 918.5   | 57.6  | R.TVNALEVEL<br>QAQHNL.R.D                      | Deamidated: 3                     |
|  |  |  |  | 307 - 322 | 941.47  | 75.7  | R.YSCQLNQVQ<br>SLISNVE.S                       | Carbamidomethyl:<br>3             |
|  |  |  |  | 58 - 73   | 979.51  | 75.9  | K.ETMQFLNDR<br>LASYLEK.V                       |                                   |
|  |  |  |  | 58 - 73   | 980     | 48    | K.ETMQFLNDR<br>LASYLEK.V                       | Deamidated: 7                     |
|  |  |  |  | 174 - 191 | 1052.56 | 91.8  | K.SDLEAQVES<br>LKEELICK.S                      | Carbamidomethyl:<br>16            |
|  |  |  |  | 92 - 108  | 1072.52 | 78.7  | R.SQQQEPLVC<br>PNYQSYFR.T                      | Carbamidomethyl:<br>9             |
|  |  |  |  | 278 - 306 | 1099.22 | 57.1  | R.TVNALEVEL<br>QAQHNL.RDSL<br>ENTLTETEAR.<br>Y | Deamidated: 3                     |

|     |                  |      |        |           |        |      |                                         |                                |
|-----|------------------|------|--------|-----------|--------|------|-----------------------------------------|--------------------------------|
| K34 | gij3093233<br>71 | 46.6 | 3745.9 | 248 - 257 | 625.84 | 24.5 | Q.YEALVETNR<br>R.D                      |                                |
|     |                  |      |        | 339 - 350 | 708.89 | 20.1 | E.SQLAEIRSDL<br>ER.Q                    |                                |
|     |                  |      |        | 246 - 257 | 725.89 | 17.4 | R.AQYEALVET<br>NRR.D                    | Deamidated: 2                  |
|     |                  |      |        | 297 - 309 | 761.41 | 22.1 | N.ALEVELQAQ<br>HNLR.D                   | Deamidated: 7                  |
|     |                  |      |        | 294 - 318 | 946.81 | 15.2 | R.TVNALEVEL<br>QAQHNLDSL<br>ENTL.TE.T   | Deamidated: 3                  |
|     |                  |      |        | 219 - 245 | 998.87 | 22.1 | R.SQLGDRLNV<br>EVDAAPTVDLN<br>RVLNETR.A |                                |
|     |                  |      |        | 240 - 245 | 366.19 | 30.3 | R.VLNETR.A                              |                                |
|     |                  |      |        | 339 - 345 | 408.76 | 50.8 | E.SQLAEIR.S                             |                                |
|     |                  |      |        | 152 - 158 | 412.22 | 56.1 | K.LASDDFR.T                             |                                |
|     |                  |      |        | 83 - 89   | 412.23 | 53.8 | R.LASYLEK.V                             |                                |
|     |                  |      |        | 23 - 29   | 425.3  | 27.4 | C.LPTLSYR.S                             |                                |
|     |                  |      |        | 159 - 165 | 456.68 | 29.2 | R.TKYESER.S                             |                                |
|     |                  |      |        | 96 - 103  | 474.27 | 44.7 | R.ENAELESR.I                            |                                |
|     |                  |      |        | 374 - 382 | 482.26 | 34.5 | R.GLLDSEDSK.<br>L                       |                                |
|     |                  |      |        | 246 - 257 | 483.94 | 57.3 | R.AQYEALVET<br>NRR.D                    |                                |
|     |                  |      |        | 125 - 132 | 494.81 | 70   | R.TIEELQQK.I                            |                                |
|     |                  |      |        | 143 - 151 | 507.37 | 64.3 | R.LVIQIDNAK.L                           |                                |
|     |                  |      |        | 75 - 82   | 512.82 | 36.4 | E.TMQFLNDR.L                            |                                |
|     |                  |      |        | 181 - 189 | 552.82 | 74.2 | R.ILDELTLCK.S                           | Carbamidomethyl:<br>8          |
|     |                  |      |        | 258 - 265 | 555.32 | 53.1 | R.DVEEWYIR.Q                            |                                |
|     |                  |      |        | 365 - 373 | 562.83 | 62.1 | R.LESEINTYR.<br>G                       |                                |
|     |                  |      |        | 365 - 373 | 563.31 | 57.3 | R.LESEINTYR.<br>G                       | Deamidated: 6                  |
|     |                  |      |        | 152 - 165 | 572.98 | 37.2 | K.LASDDFRTK<br>YESER.S                  |                                |
|     |                  |      |        | 74 - 82   | 577.32 | 62.8 | K.ETMQFLNDR<br>.L                       |                                |
|     |                  |      |        | 74 - 82   | 577.83 | 32.8 | K.ETMQFLNDR<br>.L                       | Deamidated: 4                  |
|     |                  |      |        | 74 - 82   | 585.29 | 58.5 | K.ETMQFLNDR<br>.L                       | Oxidation: 3                   |
|     |                  |      |        | 74 - 82   | 585.78 | 34.4 | K.ETMQFLNDR<br>.L                       | Oxidation: 3;<br>Deamidated: 4 |

|  |  |  |  |           |        |       |                                   |                                          |
|--|--|--|--|-----------|--------|-------|-----------------------------------|------------------------------------------|
|  |  |  |  | 229 - 239 | 585.86 | 45.8  | E.VDAAPTVDL<br>NR.V               |                                          |
|  |  |  |  | 166 - 180 | 596.04 | 54.5  | R.SLRQLVESDI<br>NSLRR.I           |                                          |
|  |  |  |  | 125 - 139 | 597.35 | 31.6  | R.TIEELQQKIL<br>CAKSE.N           | Carbamidomethyl:<br>11                   |
|  |  |  |  | 209 - 218 | 599.79 | 40.8  | K.NHEEEANSL<br>R.S                |                                          |
|  |  |  |  | 190 - 200 | 609.86 | 84    | K.SDLEAQVES<br>LK.E               |                                          |
|  |  |  |  | 198 - 207 | 616.9  | 27.3  | E.SLKEELLCLK<br>.K                | Carbamidomethyl:<br>8                    |
|  |  |  |  | 180 - 189 | 630.92 | 40    | R.RILDELTLCK.<br>S                | Carbamidomethyl:<br>9                    |
|  |  |  |  | 63 - 73   | 644.82 | 49.6  | W.FCEGSFNG<br>NEK.E               | Carbamidomethyl:<br>2                    |
|  |  |  |  | 246 - 256 | 647.36 | 79.3  | R.AQYEALVET<br>NR.R               |                                          |
|  |  |  |  | 299 - 309 | 668.9  | 50.2  | L.EVELQAQHN<br>LR.D               |                                          |
|  |  |  |  | 219 - 230 | 672.89 | 31.6  | R.SQLGDRLNV<br>EVD.A              |                                          |
|  |  |  |  | 363 - 373 | 676.37 | 67.6  | K.ARLESEINTY<br>R.G               |                                          |
|  |  |  |  | 311 - 322 | 682.37 | 78.8  | D.SLENTLTETE<br>AR.Y              |                                          |
|  |  |  |  | 277 - 293 | 684.07 | 25.6  | S.SSEQLQSYQ<br>AEIIELR.R.T        |                                          |
|  |  |  |  | 374 - 386 | 687.85 | 48.5  | R.GLLDSEDSK<br>LPSN.P             |                                          |
|  |  |  |  | 190 - 207 | 702.37 | 43.1  | K.SDLEAQVES<br>LKEELLCLK.K        | Carbamidomethyl:<br>16; Deamidated:<br>6 |
|  |  |  |  | 125 - 142 | 716.42 | 51    | R.TIEELQQKIL<br>CAKSENSR.L        | Carbamidomethyl:<br>11                   |
|  |  |  |  | 245 - 256 | 725.37 | 49.5  | T.RAQYEALVE<br>TNR.R              |                                          |
|  |  |  |  | 196 - 207 | 730.95 | 76.7  | Q.VESLKEELL<br>CLK.K              | Carbamidomethyl:<br>10                   |
|  |  |  |  | 92 - 103  | 737.36 | 37.5  | R.QLERENAEL<br>ESR.I              |                                          |
|  |  |  |  | 74 - 91   | 738.41 | 55.1  | K.ETMQFLNDR<br>LASYLEKVR.Q        |                                          |
|  |  |  |  | 351 - 362 | 739.43 | 27.2  | R.QNQEYQVLL<br>DVK.A              | Deamidated: 3                            |
|  |  |  |  | 310 - 322 | 739.89 | 103.6 | R.DSLENTLTET<br>EAR.Y             |                                          |
|  |  |  |  | 310 - 322 | 740.35 | 83.9  | R.DSLENTLTET<br>EAR.Y             | Deamidated: 5                            |
|  |  |  |  | 190 - 208 | 744.76 | 42.8  | K.SDLEAQVES<br>LKEELLCLKK.N       | Carbamidomethyl:<br>16                   |
|  |  |  |  | 219 - 239 | 761.43 | 76.6  | R.SQLGDRLNV<br>EVDAAPTVDLN<br>R.V |                                          |
|  |  |  |  | 225 - 245 | 780.12 | 53.5  | R.LNVEVDAAP<br>TVDLNRVLNET<br>R.A |                                          |

|     |                  |      |       |           |         |       |                                               |                                      |
|-----|------------------|------|-------|-----------|---------|-------|-----------------------------------------------|--------------------------------------|
|     |                  |      |       | 125 - 137 | 787.44  | 74.1  | R.TIEELQQKIL<br>CAK.S                         | Carbamidomethyl:<br>11               |
|     |                  |      |       | 225 - 239 | 813.48  | 88    | R.LNVEVDAAP<br>TVDLNR.V                       |                                      |
|     |                  |      |       | 225 - 239 | 813.98  | 29.2  | R.LNVEVDAAP<br>TVDLNR.V                       | Deamidated: 14                       |
|     |                  |      |       | 106 - 124 | 815.05  | 62    | R.ERSQQQEPL<br>LCPNYQSYFR.<br>T               | Carbamidomethyl:<br>11               |
|     |                  |      |       | 166 - 179 | 815.47  | 78.7  | R.SLRQLVESDI<br>NSLR.R                        |                                      |
|     |                  |      |       | 190 - 204 | 852.01  | 26.5  | K.SDLEAQVES<br>LKEELL.C                       |                                      |
|     |                  |      |       | 90 - 103  | 864.93  | 60.8  | K.VRQLERENA<br>ELES.R                         |                                      |
|     |                  |      |       | 294 - 309 | 918.03  | 119.9 | R.TVNALEVEL<br>QAQHNLR.D                      |                                      |
|     |                  |      |       | 294 - 309 | 918.49  | 102.4 | R.TVNALEVEL<br>QAQHNLR.D                      | Deamidated: 10                       |
|     |                  |      |       | 294 - 309 | 918.5   | 57.6  | R.TVNALEVEL<br>QAQHNLR.D                      | Deamidated: 3                        |
|     |                  |      |       | 374 - 399 | 947.78  | 71.7  | R.GLLDSEDSK<br>LPSNPCATTNA<br>SSNFCR.S        | Carbamidomethyl:<br>15, 25           |
|     |                  |      |       | 74 - 89   | 979.51  | 75.9  | K.ETMQFLNDR<br>LASYLEK.V                      |                                      |
|     |                  |      |       | 74 - 89   | 980     | 48    | K.ETMQFLNDR<br>LASYLEK.V                      | Deamidated: 7                        |
|     |                  |      |       | 190 - 207 | 1052.56 | 91.8  | K.SDLEAQVES<br>LKEELLCLK.K                    | Carbamidomethyl:<br>16               |
|     |                  |      |       | 108 - 124 | 1079.53 | 71.9  | R.SQQQEPLLC<br>PNYQSYFR.T                     | Carbamidomethyl:<br>9                |
|     |                  |      |       | 294 - 322 | 1099.22 | 57.1  | R.TVNALEVEL<br>QAQHNLRDSL<br>ENTLTETEAR.<br>Y | Deamidated: 3                        |
| K75 | gij9990000<br>81 | 58.8 | 303.3 | 68 - 76   | 499.76  | 18.5  | S.ISGCGSNFR.<br>S                             | Carbamidomethyl:<br>4; Deamidated: 7 |
|     |                  |      |       | 437 - 447 | 632.41  | 51.7  | K.LALDVEIATY<br>R.K                           |                                      |
|     |                  |      |       | 430 - 447 | 707.42  | 19.3  | Y.QELMNIKAL<br>DVEIATYR.K                     |                                      |
|     |                  |      |       | 164 - 170 | 453.78  | 35.3  | R.FLEQQNK.V                                   |                                      |
|     |                  |      |       | 242 - 252 | 596.87  | 76.3  | R.TAAENEFVA<br>LK.N                           |                                      |
|     |                  |      |       | 308 - 319 | 651.92  | 102.2 | R.SLDLDSIIAE<br>VK.A                          |                                      |
| K83 | gij3122835<br>88 | 53.9 | 4715  | 413 - 421 | 565.33  | 46.2  | R.RLLEGEEQR.<br>L                             |                                      |
|     |                  |      |       | 413 - 422 | 621.85  | 22.8  | R.RLLEGEEQR<br>L.C                            |                                      |
|     |                  |      |       | 131 - 140 | 631.38  | 27.8  | R.FLEQQNKLL<br>E.T                            |                                      |
|     |                  |      |       | 325 - 329 | 633.35  | 16.5  | K.EEINE.L                                     |                                      |

|  |  |  |  |           |        |      |                                     |                                              |
|--|--|--|--|-----------|--------|------|-------------------------------------|----------------------------------------------|
|  |  |  |  | 228 - 246 | 740.43 | 20.9 | K.SDLEANSEA<br>LIQEIDFLRR.L         |                                              |
|  |  |  |  | 227 - 246 | 783.12 | 35.4 | R.KSDLEANSE<br>ALIQEIDFLRR.L        |                                              |
|  |  |  |  | 414 - 437 | 883.73 | 18.9 | R.LLEGEEQRL<br>CEVGAVNVC<br>VSSSR.G | Carbamidomethyl:<br>10, 19;<br>Deamidated: 7 |
|  |  |  |  | 273 - 295 | 895.45 | 23.5 | R.DLNMDCIVA<br>EIKAQYDDIAS<br>RSR.A | Carbamidomethyl:<br>6; Deamidated: 3         |
|  |  |  |  | 39 - 44   | 378.17 | 29   | R.GISCYR.G                          | Carbamidomethyl:<br>4                        |
|  |  |  |  | 122 - 128 | 406.25 | 61.3 | R.FAAFIDK.V                         |                                              |
|  |  |  |  | 197 - 206 | 422.25 | 33.7 | K.KKYEEVAL<br>R.A                   |                                              |
|  |  |  |  | 45 - 53   | 426.21 | 56.8 | R.GLTGGFGSR<br>.S                   |                                              |
|  |  |  |  | 131 - 137 | 453.78 | 35.3 | R.FLEQQNK.L                         |                                              |
|  |  |  |  | 402 - 413 | 473.95 | 67   | K.LGLDIEIATY<br>RR.L                |                                              |
|  |  |  |  | 247 - 253 | 476.29 | 47.5 | R.LYEEEEIR.V                        |                                              |
|  |  |  |  | 259 - 267 | 481.35 | 33.8 | N.ISDTSVIVK.M                       |                                              |
|  |  |  |  | 414 - 421 | 487.3  | 59.9 | R.LLEGEEQR.L                        |                                              |
|  |  |  |  | 337 - 345 | 487.78 | 48.9 | R.LTAEVENAK.<br>C                   |                                              |
|  |  |  |  | 219 - 226 | 499.26 | 55.5 | K.DVDCAYVR.<br>K                    | Carbamidomethyl:<br>4                        |
|  |  |  |  | 199 - 206 | 504.82 | 56.5 | K.YEEVALR.A                         |                                              |
|  |  |  |  | 296 - 303 | 506.29 | 57   | R.AEASWYR.<br>S                     |                                              |
|  |  |  |  | 16 - 29   | 507.94 | 40.4 | R.AFSCVSACG<br>PRPGR.C              | Carbamidomethyl:<br>4, 8                     |
|  |  |  |  | 325 - 332 | 508.79 | 39.4 | K.EEINELNR.V                        |                                              |
|  |  |  |  | 285 - 293 | 519.77 | 75   | K.AQYDDIASR.<br>S                   |                                              |
|  |  |  |  | 337 - 350 | 531.28 | 40   | R.LTAEVENAK<br>CQNSK.L              | Carbamidomethyl:<br>10                       |
|  |  |  |  | 122 - 130 | 533.84 | 64.3 | R.FAAFIDKVR.<br>F                   |                                              |
|  |  |  |  | 373 - 382 | 536.33 | 87.2 | K.LAGLEEALQ<br>K.A                  |                                              |
|  |  |  |  | 428 - 437 | 539.74 | 37.6 | G.AVNVCVSSS<br>R.G                  | Carbamidomethyl:<br>5                        |
|  |  |  |  | 414 - 422 | 543.84 | 57.4 | R.LLEGEEQRL.<br>C                   |                                              |
|  |  |  |  | 246 - 253 | 554.33 | 49.8 | R.RLYEEEEIR.V                       |                                              |
|  |  |  |  | 30 - 38   | 556.3  | 57.9 | R.CCITAAPYR.<br>G                   | Carbamidomethyl:<br>1, 2                     |
|  |  |  |  | 393 - 401 | 564.31 | 40.6 | K.EYQEVMSK<br>.L                    |                                              |

|  |  |  |  |           |        |       |                            |                                      |
|--|--|--|--|-----------|--------|-------|----------------------------|--------------------------------------|
|  |  |  |  | 198 - 206 | 568.86 | 76.3  | K.KYEEEEVALR.<br>A         |                                      |
|  |  |  |  | 333 - 342 | 579.38 | 47.2  | R.VIQRLTAEVE<br>.N         |                                      |
|  |  |  |  | 4 - 15    | 579.83 | 82.6  | C.GFSTVGS GF<br>GSR.A      |                                      |
|  |  |  |  | 323 - 336 | 581.34 | 49.7  | R.TKEEINELNR<br>VIQR.L     |                                      |
|  |  |  |  | 383 - 392 | 589.26 | 63    | K.AKQDMACLL<br>K.E         | Carbamidomethyl:<br>7                |
|  |  |  |  | 422 - 432 | 589.32 | 32.4  | R.LCEGVGAVN<br>VC.V        | Carbamidomethyl:<br>2, 11            |
|  |  |  |  | 207 - 217 | 596.87 | 76.3  | R.ATAENEFVA<br>LK.K        |                                      |
|  |  |  |  | 383 - 392 | 597.34 | 38.8  | K.AKQDMACLL<br>K.E         | Carbamidomethyl:<br>7; Oxidation: 5  |
|  |  |  |  | 372 - 382 | 600.41 | 80.9  | C.KLAGLEEAL<br>QK.A        |                                      |
|  |  |  |  | 16 - 26   | 606.25 | 35.4  | R.AFSCVVSACG<br>PR.P       | Carbamidomethyl:<br>4, 8             |
|  |  |  |  | 306 - 315 | 609.89 | 64.6  | K.CEEIKATVIR.<br>H         | Carbamidomethyl:<br>1                |
|  |  |  |  | 170 - 180 | 611.77 | 87.5  | R.EAECVEADS<br>GR.L        | Carbamidomethyl:<br>4                |
|  |  |  |  | 296 - 305 | 613.82 | 54.5  | R.AEAESWYRS<br>K.C         |                                      |
|  |  |  |  | 323 - 332 | 623.35 | 61.2  | R.TKEEINELNR<br>.V         |                                      |
|  |  |  |  | 294 - 303 | 627.83 | 69.4  | R.SRAEAESWY<br>R.S         |                                      |
|  |  |  |  | 402 - 412 | 632.41 | 104.3 | K.LGLDIEIATY<br>R.R        |                                      |
|  |  |  |  | 373 - 384 | 635.91 | 73.9  | K.LAGLEEALQ<br>KAK.Q       |                                      |
|  |  |  |  | 285 - 295 | 641.31 | 37    | K.AQYDDIASR<br>SR.A        |                                      |
|  |  |  |  | 181 - 197 | 658.39 | 46.3  | R.LSSELNHVQ<br>EVLEGYKK.K  |                                      |
|  |  |  |  | 207 - 218 | 660.86 | 81.7  | R.ATAENEFVA<br>LKK.D       |                                      |
|  |  |  |  | 371 - 382 | 680.44 | 75.9  | R.CKLAGLEEA<br>LQK.A       | Carbamidomethyl:<br>1                |
|  |  |  |  | 385 - 401 | 696.7  | 26.6  | K.QDMACLLKE<br>YQEVMSNSK.L | Carbamidomethyl:<br>5; Deamidated: 1 |
|  |  |  |  | 97 - 108  | 700.9  | 54.2  | L.NLEIDPNAQC<br>VK.Q       | Carbamidomethyl:<br>10               |
|  |  |  |  | 2 - 15    | 710.3  | 112.4 | M.TCGFSTVGS<br>GFGSR.A     | Carbamidomethyl:<br>2                |
|  |  |  |  | 424 - 437 | 710.84 | 75.7  | C.EGVGAVNVC<br>VSSSR.G     | Carbamidomethyl:<br>9                |
|  |  |  |  | 273 - 284 | 710.9  | 100.1 | R.DLNMDCIVA<br>EIK.A       | Carbamidomethyl:<br>6                |
|  |  |  |  | 273 - 284 | 718.88 | 85.8  | R.DLNMDCIVA<br>EIK.A       | Carbamidomethyl:<br>6; Oxidation: 4  |
|  |  |  |  | 333 - 345 | 735.91 | 72.6  | R.VIQRLTAEVE<br>NAK.C      |                                      |
|  |  |  |  | 254 - 267 | 743.99 | 102.6 | R.VLQANISDTS<br>VIVK.M     |                                      |

|      |                  |     |     |           |         |       |                                       |                                             |
|------|------------------|-----|-----|-----------|---------|-------|---------------------------------------|---------------------------------------------|
|      |                  |     |     | 131 - 142 | 745.94  | 62.7  | R.FLEQQNKLL<br>ETK.L                  |                                             |
|      |                  |     |     | 383 - 401 | 762.71  | 77.7  | K.AKQDMACLL<br>KEYQEVMSK.<br>L        | Carbamidomethyl:<br>7                       |
|      |                  |     |     | 138 - 149 | 768.94  | 70.8  | K.LLETKLQFFQ<br>NR.Q                  |                                             |
|      |                  |     |     | 438 - 445 | 776.34  | 26.6  | R.GGVVCGDL.<br>C                      | Carbamidomethyl:<br>5                       |
|      |                  |     |     | 349 - 370 | 776.77  | 40.3  | N.SKLEAAVTQ<br>AEQQGEVALN<br>DAR.C    |                                             |
|      |                  |     |     | 131 - 149 | 808.79  | 48.7  | R.FLEQQNKLL<br>ETKLQFFQNR.<br>Q       |                                             |
|      |                  |     |     | 273 - 293 | 814.1   | 63.4  | R.DLNMDCIVA<br>EIKAQYDDIAS<br>R.S     | Carbamidomethyl:<br>6                       |
|      |                  |     |     | 422 - 437 | 847.42  | 126.7 | R.LCEGVGAVN<br>VCVSSSR.G              | Carbamidomethyl:<br>2, 11                   |
|      |                  |     |     | 422 - 437 | 847.88  | 34.9  | R.LCEGVGAVN<br>VCVSSSR.G              | Carbamidomethyl:<br>2, 11;<br>Deamidated: 9 |
|      |                  |     |     | 414 - 437 | 883.43  | 75.4  | R.LLEGEEQRL<br>CEGVGAVNVC<br>VSSSR.G  | Carbamidomethyl:<br>10, 19                  |
|      |                  |     |     | 354 - 370 | 900.45  | 52.9  | A.AVTQAEQQG<br>EVALNDAR.C             |                                             |
|      |                  |     |     | 346 - 370 | 911.13  | 40.2  | K.CQNSKLEAA<br>VTQAEQQGEV<br>ALNDAR.C | Carbamidomethyl:<br>1; Deamidated:<br>12    |
|      |                  |     |     | 353 - 370 | 935.98  | 113.8 | E.AAVTQAEQQ<br>GEVALNDAR.C            |                                             |
|      |                  |     |     | 228 - 245 | 1032.54 | 71.2  | K.SDLEANSEA<br>LIQEIDFLR.R            | Deamidated: 6                               |
|      |                  |     |     | 351 - 370 | 1057.1  | 124.6 | K.LEAAVTQAE<br>QQGEVALNDA<br>R.C      |                                             |
|      |                  |     |     | 351 - 370 | 1057.51 | 121.9 | K.LEAAVTQAE<br>QQGEVALNDA<br>R.C      | Deamidated: 17                              |
|      |                  |     |     | 351 - 370 | 1057.55 | 62.7  | K.LEAAVTQAE<br>QQGEVALNDA<br>R.C      | Deamidated: 7                               |
|      |                  |     |     | 227 - 245 | 1096.63 | 88.1  | R.KSDLEANSE<br>ALIQEIDFLR.R           | Deamidated: 7                               |
| KAP6 | gij2245560<br>10 | 8.3 | 618 | 22 - 36   | 566.25  | 41    | G.LGCGYGSCY<br>GSGFRR.L               | Carbamidomethyl:<br>3, 8                    |
|      |                  |     |     | 41 - 50   | 570.24  | 62.5  | G.YGCGYGYG<br>SR.S                    | Carbamidomethyl:<br>3                       |
|      |                  |     |     | 40 - 50   | 598.73  | 53.5  | C.GYCGYGYG<br>GSR.S                   | Carbamidomethyl:<br>4                       |
|      |                  |     |     | 51 - 62   | 630.76  | 49.9  | R.SLCGSGYGC<br>GSR.S                  | Carbamidomethyl:<br>3, 9                    |
|      |                  |     |     | 71 - 83   | 719.31  | 49.2  | G.CGSGYGS<br>FGYYY.-                  | Carbamidomethyl:<br>1                       |
|      |                  |     |     | 44 - 50   | 759.29  | 29.6  | C.GYGYGSR.S                           |                                             |

|        |                  |      |     |         |         |       |                                                 |                                                           |
|--------|------------------|------|-----|---------|---------|-------|-------------------------------------------------|-----------------------------------------------------------|
|        |                  |      |     | 37 - 50 | 763.8   | 88.8  | R.LGCGYGCG<br>YGYGSR.S                          | Carbamidomethyl:<br>3, 7                                  |
|        |                  |      |     | 22 - 35 | 770.84  | 102.2 | G.LGCGYGSCY<br>GSGFR.R                          | Carbamidomethyl:<br>3, 8                                  |
|        |                  |      |     | 36 - 50 | 841.81  | 61.6  | R.RLGCGYGC<br>GYGYGSR.S                         | Carbamidomethyl:<br>4, 8                                  |
|        |                  |      |     | 63 - 83 | 1109.93 | 79.7  | R.SLCGSGYGC<br>GSGYGSGFGY<br>YY.-               | Carbamidomethyl:<br>3, 9                                  |
| KAP7   | gi 2245559<br>62 | 8.8  | 185 | 4 - 23  | 822.36  | 50.8  | R.FFCCGSYFP<br>GYPSYGTNFH<br>R.T                | Carbamidomethyl:<br>3, 4; Deamidated:<br>17               |
|        |                  |      |     | 27 - 43 | 857.96  | 30.5  | R.ATPLNCVVP<br>LGSPLGYG.C                       | Carbamidomethyl:<br>6                                     |
|        |                  |      |     | 27 - 43 | 858.45  | 31.8  | R.ATPLNCVVP<br>LGSPLGYG.C                       | Carbamidomethyl:<br>6; Deamidated: 5                      |
|        |                  |      |     | 2 - 23  | 907.72  | 71.9  | M.TRFFCCGSY<br>FPGYPSYGTN<br>FHR.T              | Carbamidomethyl:<br>5, 6                                  |
| KAP3.2 | gi 229307        | 10.3 | 869 | 13 - 26 | 533.92  | 21.1  | T.GPATTICSSD<br>KFCR.C                          | Carbamidomethyl:<br>7, 13                                 |
|        |                  |      |     | 69 - 96 | 1023.47 | 18.7  | N.SSHPTPLGS<br>GINLTTFIQPGC<br>ENVCEPR.C        | Carbamidomethyl:<br>21, 25                                |
|        |                  |      |     | 27 - 46 | 1158.58 | 22.6  | R.CGVCLPSTC<br>PHNISLLQPTC.<br>C                | Carbamidomethyl:<br>1, 4, 9, 20;<br>Deamidated: 12,<br>17 |
|        |                  |      |     | 12 - 23 | 619.33  | 76.9  | R.TGPATTICSS<br>DK.F                            | Carbamidomethyl:<br>8                                     |
|        |                  |      |     | 27 - 37 | 644.28  | 61.4  | R.CGVCLPSTC<br>PH.N                             | Carbamidomethyl:<br>1, 4, 9                               |
|        |                  |      |     | 12 - 24 | 692.83  | 72.6  | R.TGPATTICSS<br>DKF.C                           | Carbamidomethyl:<br>8                                     |
|        |                  |      |     | 27 - 38 | 701.8   | 44.1  | R.CGVCLPSTC<br>PHN.I                            | Carbamidomethyl:<br>1, 4, 9;<br>Deamidated: 12            |
|        |                  |      |     | 15 - 26 | 723.3   | 46.6  | P.ATTICSSDKF<br>CR.C                            | Carbamidomethyl:<br>5, 11                                 |
|        |                  |      |     | 85 - 96 | 729.84  | 72.7  | F.IQPGCENVC<br>EPR.C                            | Carbamidomethyl:<br>5, 9                                  |
|        |                  |      |     | 84 - 96 | 803.39  | 59.5  | T.FIQPGCENV<br>CEPR.C                           | Carbamidomethyl:<br>6, 10                                 |
|        |                  |      |     | 12 - 26 | 850.88  | 103.9 | R.TGPATTICSS<br>DKFCR.C                         | Carbamidomethyl:<br>8, 14                                 |
|        |                  |      |     | 83 - 96 | 853.92  | 67    | T.TFIQPGCENV<br>CEPR.C                          | Carbamidomethyl:<br>7, 11                                 |
|        |                  |      |     | 72 - 96 | 920.09  | 32.9  | H.PTPGLSGINL<br>TTFIQPGCENV<br>CEPR.C           | Carbamidomethyl:<br>18, 22;<br>Deamidated: 15             |
|        |                  |      |     | 79 - 96 | 1074.51 | 68.5  | G.INLTTFIQPG<br>CENVCEPR.C                      | Carbamidomethyl:<br>11, 15                                |
|        |                  |      |     | 27 - 45 | 1078    | 54.2  | R.CGVCLPSTC<br>PHNISLLQPT.C                     | Carbamidomethyl:<br>1, 4, 9;<br>Deamidated: 12            |
|        |                  |      |     | 66 - 96 | 1137.21 | 46.3  | F.LLNSSHPTP<br>GLSGINLTTFIQ<br>PGCENVCEPR.<br>C | Carbamidomethyl:<br>24, 28;<br>Deamidated: 15             |



|                             |              |       |       |               |         |       |                             |                         |
|-----------------------------|--------------|-------|-------|---------------|---------|-------|-----------------------------|-------------------------|
| PREDICTED:<br>desmocolin-3  | gj 426253651 | 93.7  | 87.3  | 347 - 356     | 589.84  | 15.2  | K.DSNDNLPTFR.Q              |                         |
|                             |              |       |       | 44 - 55       | 687.92  | 20.3  | L.EADKMIGRVNLK.E            | Deamidated: 10          |
|                             |              |       |       | 291 - 313     | 824.13  | 51.8  | R.SPGLFSVHPSTGVITTVSHYLDR.E |                         |
| PREDICTED:<br>desmoglucin-4 | gj 426253981 | 113.8 | 663   | 233 - 243     | 695.81  | 20.7  | R.EQHSMYNLLVR.G             | Deamidated: 2           |
|                             |              |       |       | 247 - 261     | 849.8   | 19    | D.RDGATDGLSSECDR.I          | Carbamidomethyl: 12, 14 |
|                             |              |       |       | 903 - 909     | 433.25  | 43.9  | I.PEPMHR.D                  |                         |
|                             |              |       |       | 898 - 909     | 469.62  | 37.6  | K.EEVAIPEPVMHR.D            |                         |
|                             |              |       |       | 901 - 909     | 525.33  | 53.5  | V.AIPEPVMHR.D               |                         |
|                             |              |       |       | 1,037 - 1,045 | 570.3   | 40.8  | R.YSNIHYSQQ.-               |                         |
|                             |              |       |       | 900 - 909     | 574.86  | 34.1  | E.VAIPEPVMHR.D              |                         |
|                             |              |       |       | 139 - 149     | 663.89  | 26.4  | R.GEDLERPLELR.V             |                         |
|                             |              |       |       | 1,019 - 1,031 | 675.82  | 41.9  | R.ISQTSSTSPVTSR.H           |                         |
|                             |              |       |       | 1,019 - 1,031 | 676.35  | 72.7  | R.ISQTSSTSPVTSR.H           | Deamidated: 3           |
|                             |              |       |       | 123 - 133     | 712.92  | 77.9  | R.EITPLFLIYCR.A             | Carbamidomethyl: 10     |
|                             |              |       |       | 203 - 218     | 888.97  | 76.8  | K.IVSQEPAGSPMFIMNR.Y        |                         |
|                             |              |       |       | 774 - 792     | 1078.01 | 117.8 | R.DYGDTGLNLAFLDSYFSEK.A     |                         |
| PREDICTED:<br>desmoplakin   | gj 426251400 | 331   | 228.9 | 1,808 - 1,815 | 487.79  | 29.3  | S.QLQISNNR.T                | Deamidated: 3, 6        |
|                             |              |       |       | 2,772 - 2,781 | 532.3   | 17.6  | K.MSAAEAVKEK.W              |                         |
|                             |              |       |       | 866 - 874     | 543.84  | 23.4  | K.KIKNDLNLK.K               | Deamidated: 4           |
|                             |              |       |       | 1,669 - 1,679 | 623.35  | 23.2  | L.TQQLEQASIVK.K             | Deamidated: 3           |
|                             |              |       |       | 2,638 - 2,651 | 662.84  | 19    | S.TGGGLSDDVFGSR.H           |                         |
|                             |              |       |       | 2,152 - 2,165 | 725.38  | 31.6  | D.PFSGKTVSVSEAIK.K          |                         |
|                             |              |       |       | 2,403 - 2,414 | 732.33  | 15.1  | S.LFQAMNKELIEK.G            |                         |

|                                       |                  |      |      |           |        |      |                                           |                       |
|---------------------------------------|------------------|------|------|-----------|--------|------|-------------------------------------------|-----------------------|
|                                       |                  |      |      | 148 - 156 | 496.81 | 69.6 | K.YGDGIQLAR.S                             |                       |
| PREDICTED:<br>junction<br>plakoglobin | gj 4262380<br>25 | 81.7 | 89.3 | 125 - 142 | 677.04 | 17.3 | K.SAIVHLINYQ<br>DDAELATR.A                |                       |
|                                       |                  |      |      | 638 - 651 | 742.41 | 72   | R.NEGTATYAA<br>AVLFR.I                    |                       |
| K34                                   | gj 4262380<br>03 | 46.6 | 3839 | 232 - 241 | 625.84 | 24.5 | Q.YEALVETNR<br>R.D                        |                       |
|                                       |                  |      |      | 323 - 334 | 708.89 | 20.1 | E.SQLAEIRSDL<br>ER.Q                      |                       |
|                                       |                  |      |      | 230 - 241 | 725.89 | 17.4 | R.AQYEALVET<br>NRR.D                      | Deamidated: 2         |
|                                       |                  |      |      | 281 - 293 | 761.41 | 22.1 | N.ALEVELQAA<br>HNL.R.D                    | Deamidated: 7         |
|                                       |                  |      |      | 278 - 302 | 946.81 | 15.2 | R.TVNALEVEL<br>QAQHNL.RDSL<br>ENTL.TE.T   | Deamidated: 3         |
|                                       |                  |      |      | 203 - 229 | 998.87 | 22.1 | R.SQLGDR.LNV<br>EVDAAPT.VDLN<br>RVLNETR.A |                       |
|                                       |                  |      |      | 224 - 229 | 366.19 | 30.3 | R.VLNETR.A                                |                       |
|                                       |                  |      |      | 323 - 329 | 408.76 | 50.8 | E.SQLAEIR.S                               |                       |
|                                       |                  |      |      | 136 - 142 | 412.22 | 56.1 | K.LASDDFR.T                               |                       |
|                                       |                  |      |      | 67 - 73   | 412.23 | 53.8 | R.LASYLEK.V                               |                       |
|                                       |                  |      |      | 7 - 13    | 425.3  | 27.4 | C.LPTLSYR.S                               |                       |
|                                       |                  |      |      | 143 - 149 | 456.68 | 29.2 | R.TKYESER.S                               |                       |
|                                       |                  |      |      | 80 - 87   | 474.27 | 44.7 | R.ENAELESR.I                              |                       |
|                                       |                  |      |      | 358 - 366 | 482.26 | 34.5 | R.GLLDSEDSK.<br>L                         |                       |
|                                       |                  |      |      | 230 - 241 | 483.94 | 57.3 | R.AQYEALVET<br>NRR.D                      |                       |
|                                       |                  |      |      | 109 - 116 | 494.81 | 70   | R.TIEELQQK.I                              |                       |
|                                       |                  |      |      | 127 - 135 | 507.37 | 64.3 | R.LVIQIDNAK.L                             |                       |
|                                       |                  |      |      | 59 - 66   | 512.82 | 36.4 | E.TMQFLNDR.L                              |                       |
|                                       |                  |      |      | 165 - 173 | 552.82 | 74.2 | R.ILDELTLCK.S                             | Carbamidomethyl:<br>8 |
|                                       |                  |      |      | 242 - 249 | 555.32 | 53.1 | R.DVEEWYIR.Q                              |                       |
|                                       |                  |      |      | 349 - 357 | 562.83 | 62.1 | R.LESEINTYR.<br>G                         |                       |
|                                       |                  |      |      | 349 - 357 | 563.31 | 57.3 | R.LESEINTYR.<br>G                         | Deamidated: 6         |

|  |  |  |  |           |        |      |                            |                                          |
|--|--|--|--|-----------|--------|------|----------------------------|------------------------------------------|
|  |  |  |  | 136 - 149 | 572.98 | 37.2 | K.LASDDFRTK<br>YESER.S     |                                          |
|  |  |  |  | 58 - 66   | 577.32 | 62.8 | K.ETMQFLNDR<br>.L          |                                          |
|  |  |  |  | 58 - 66   | 577.83 | 32.8 | K.ETMQFLNDR<br>.L          | Deamidated: 4                            |
|  |  |  |  | 58 - 66   | 585.29 | 58.5 | K.ETMQFLNDR<br>.L          | Oxidation: 3                             |
|  |  |  |  | 58 - 66   | 585.78 | 34.4 | K.ETMQFLNDR<br>.L          | Oxidation: 3;<br>Deamidated: 4           |
|  |  |  |  | 213 - 223 | 585.86 | 45.8 | E.VDAAPTVDL<br>NR.V        |                                          |
|  |  |  |  | 150 - 164 | 596.04 | 54.5 | R.SLRQLVESDI<br>NSLRR.I    |                                          |
|  |  |  |  | 109 - 123 | 597.35 | 31.6 | R.TIEELQQKIL<br>CAKSE.N    | Carbamidomethyl:<br>11                   |
|  |  |  |  | 193 - 202 | 599.79 | 40.8 | K.NHEEEANSL<br>R.S         |                                          |
|  |  |  |  | 174 - 184 | 609.86 | 84   | K.SDLEAQVES<br>LK.E        |                                          |
|  |  |  |  | 182 - 191 | 616.9  | 27.3 | E.SLKEELLCLK<br>.K         | Carbamidomethyl:<br>8                    |
|  |  |  |  | 164 - 173 | 630.92 | 40   | R.RILDELTLCK.<br>S         | Carbamidomethyl:<br>9                    |
|  |  |  |  | 47 - 57   | 644.82 | 49.6 | W.FCEGSFNG<br>NEK.E        | Carbamidomethyl:<br>2                    |
|  |  |  |  | 230 - 240 | 647.36 | 79.3 | R.AQYEALVET<br>NR.R        |                                          |
|  |  |  |  | 92 - 102  | 650.34 | 39.6 | R.SQQQEPLVC<br>PN.Y        | Carbamidomethyl:<br>9                    |
|  |  |  |  | 76 - 91   | 662.4  | 30.8 | R.QLERENAEL<br>ESRILER.S   |                                          |
|  |  |  |  | 283 - 293 | 668.9  | 50.2 | L.EVELQAQHN<br>LR.D        |                                          |
|  |  |  |  | 203 - 214 | 672.89 | 31.6 | R.SQLGDRNLV<br>EVD.A       |                                          |
|  |  |  |  | 347 - 357 | 676.37 | 67.6 | K.ARLESEINTY<br>R.G        |                                          |
|  |  |  |  | 295 - 306 | 682.37 | 78.8 | D.SLENTLTETE<br>AR.Y       |                                          |
|  |  |  |  | 261 - 277 | 684.07 | 25.6 | S.SSEQLQSYQ<br>AEIILRR.T   |                                          |
|  |  |  |  | 358 - 370 | 687.85 | 48.5 | R.GLLDSEDSK<br>LPSN.P      |                                          |
|  |  |  |  | 174 - 191 | 702.37 | 43.1 | K.SDLEAQVES<br>LKEELLCLK.K | Carbamidomethyl:<br>16; Deamidated:<br>6 |
|  |  |  |  | 109 - 126 | 716.42 | 51   | R.TIEELQQKIL<br>CAKSENSR.L | Carbamidomethyl:<br>11                   |
|  |  |  |  | 229 - 240 | 725.37 | 49.5 | T.RAQYEALVE<br>TNR.R       |                                          |
|  |  |  |  | 180 - 191 | 730.95 | 76.7 | Q.VESLKEELL<br>CLK.K       | Carbamidomethyl:<br>10                   |
|  |  |  |  | 76 - 87   | 737.36 | 37.5 | R.QLERENAEL<br>ESR.I       |                                          |
|  |  |  |  | 58 - 75   | 738.41 | 55.1 | K.ETMQFLNDR<br>LASYLEKVR.Q |                                          |

|                       |                  |    |        |           |         |       |                                               |                            |
|-----------------------|------------------|----|--------|-----------|---------|-------|-----------------------------------------------|----------------------------|
|                       |                  |    |        | 335 - 346 | 739.43  | 27.2  | R.QNQEQVLL<br>DVK.A                           | Deamidated: 3              |
|                       |                  |    |        | 294 - 306 | 739.89  | 103.6 | R.DSLENTLTET<br>EAR.Y                         |                            |
|                       |                  |    |        | 294 - 306 | 740.35  | 83.9  | R.DSLENTLTET<br>EAR.Y                         | Deamidated: 5              |
|                       |                  |    |        | 174 - 192 | 744.76  | 42.8  | K.SDLEAQVES<br>LKEELLCLKK.N                   | Carbamidomethyl:<br>16     |
|                       |                  |    |        | 203 - 223 | 761.43  | 76.6  | R.SQLGDRLNV<br>EVDAAPTVDLN<br>R.V             |                            |
|                       |                  |    |        | 209 - 229 | 780.12  | 53.5  | R.LNVEVDAAP<br>TVDLNRVLNET<br>R.A             |                            |
|                       |                  |    |        | 109 - 121 | 787.44  | 74.1  | R.TIEELQQKIL<br>CAK.S                         | Carbamidomethyl:<br>11     |
|                       |                  |    |        | 209 - 223 | 813.48  | 88    | R.LNVEVDAAP<br>TVDLNR.V                       |                            |
|                       |                  |    |        | 209 - 223 | 813.98  | 29.2  | R.LNVEVDAAP<br>TVDLNR.V                       | Deamidated: 14             |
|                       |                  |    |        | 150 - 163 | 815.47  | 78.7  | R.SLRQLVESDI<br>NSLR.R                        |                            |
|                       |                  |    |        | 174 - 188 | 852.01  | 26.5  | K.SDLEAQVES<br>LKEELL.C                       |                            |
|                       |                  |    |        | 74 - 87   | 864.93  | 60.8  | K.VRQLERENA<br>ELESR.I                        |                            |
|                       |                  |    |        | 88 - 108  | 885.79  | 77.8  | R.ILERSQQQE<br>PLVCPNYQSYF<br>R.T             | Carbamidomethyl:<br>13     |
|                       |                  |    |        | 278 - 293 | 918.03  | 119.9 | R.TVNALEVEL<br>QAQHNLR.D                      |                            |
|                       |                  |    |        | 278 - 293 | 918.49  | 102.4 | R.TVNALEVEL<br>QAQHNLR.D                      | Deamidated: 10             |
|                       |                  |    |        | 278 - 293 | 918.5   | 57.6  | R.TVNALEVEL<br>QAQHNLR.D                      | Deamidated: 3              |
|                       |                  |    |        | 358 - 383 | 947.78  | 71.7  | R.GLLDSEDSK<br>LPSNPCATTNA<br>SSNFCR.S        | Carbamidomethyl:<br>15, 25 |
|                       |                  |    |        | 58 - 73   | 979.51  | 75.9  | K.ETMQFLNDR<br>LASYLEK.V                      |                            |
|                       |                  |    |        | 58 - 73   | 980     | 48    | K.ETMQFLNDR<br>LASYLEK.V                      | Deamidated: 7              |
|                       |                  |    |        | 174 - 191 | 1052.56 | 91.8  | K.SDLEAQVES<br>LKEELLCLK.K                    | Carbamidomethyl:<br>16     |
|                       |                  |    |        | 92 - 108  | 1072.52 | 78.7  | R.SQQQEPLVC<br>PNYQSYFR.T                     | Carbamidomethyl:<br>9      |
|                       |                  |    |        | 278 - 306 | 1099.22 | 57.1  | R.TVNALEVEL<br>QAQHNLRDSL<br>ENTLTETEAR.<br>Y | Deamidated: 3              |
| PREDIC<br>TED:<br>K32 | gij4262380<br>05 | 46 | 1100.8 | 229 - 238 | 625.84  | 24.5  | R.YEALVETNR<br>R.D                            |                            |
|                       |                  |    |        | 213 - 226 | 801.44  | 22.7  | A.VSPVDLNTV<br>LEEMR.C                        |                            |
|                       |                  |    |        | 338 - 343 | 357.77  | 49    | R.VLLDVR.A                                    |                            |

|                     |              |      |       |           |         |       |                         |                                    |
|---------------------|--------------|------|-------|-----------|---------|-------|-------------------------|------------------------------------|
|                     |              |      |       | 133 - 139 | 404.25  | 53.8  | K.LAADDFR.S             |                                    |
|                     |              |      |       | 320 - 326 | 408.76  | 50.8  | E.SQLAEIR.C             |                                    |
|                     |              |      |       | 77 - 83   | 444.76  | 46.6  | R.ENVELER.R             |                                    |
|                     |              |      |       | 106 - 113 | 494.81  | 70    | K.TIEELQQK.I            |                                    |
|                     |              |      |       | 355 - 363 | 518.78  | 45.4  | R.GLLDSEDCK.L           | Carbamidomethyl: 8                 |
|                     |              |      |       | 239 - 246 | 541.31  | 50.7  | R.DVEEWFTR.Q            |                                    |
|                     |              |      |       | 162 - 170 | 552.82  | 74.2  | R.ILDELTLCK.A           | Carbamidomethyl: 8                 |
|                     |              |      |       | 55 - 63   | 554.36  | 61.5  | K.ETLQFLNSR.L           |                                    |
|                     |              |      |       | 346 - 354 | 554.84  | 49.7  | R.LEAEINTYR.G           |                                    |
|                     |              |      |       | 161 - 170 | 630.92  | 40    | R.RILDELTLCK.A          | Carbamidomethyl: 9                 |
|                     |              |      |       | 344 - 354 | 668.39  | 53.2  | R.ARLEAEINTYR.G         |                                    |
|                     |              |      |       | 292 - 303 | 682.37  | 78.8  | D.SLENTLTETE AR.Y       |                                    |
|                     |              |      |       | 291 - 303 | 739.89  | 103.6 | R.DSLENTLTET EAR.Y      |                                    |
|                     |              |      |       | 291 - 303 | 740.35  | 83.9  | R.DSLENTLTET EAR.Y      | Deamidated: 5                      |
|                     |              |      |       | 332 - 343 | 766.93  | 37.8  | R.QNQEYRVLL DVR.A       |                                    |
|                     |              |      |       | 212 - 226 | 836.94  | 66.1  | D.AVSPVDLNT VLEEMR.C    |                                    |
|                     |              |      |       | 84 - 101  | 1069.44 | 38.7  | R.RLQEACDFQ EPTVGPNYL.C | Carbamidomethyl: 6; Deamidated: 16 |
| PREDICTED: K18-like | gij426246505 | 47.9 | 304.4 | 158 - 164 | 404.25  | 53.8  | R.LAADDFR.V             |                                    |
|                     |              |      |       | 372 - 380 | 554.84  | 49.7  | K.LEAEINTYR.R           |                                    |
|                     |              |      |       | 370 - 380 | 668.39  | 53.2  | T.VKLEAEINTYR.R         |                                    |
|                     |              |      |       | 276 - 290 | 724.9   | 53.5  | K.ESTAAVTSQ NAEIGA.A    |                                    |
|                     |              |      |       | 276 - 290 | 725.38  | 59.8  | K.ESTAAVTSQ NAEIGA.A    | Deamidated: 9                      |
|                     |              |      |       | 149 - 164 | 915.99  | 34.4  | R.IVLQIDNARL AADDFR.V   | Deamidated: 7                      |
| PREDICTED: K20      | gij426237957 | 48.3 | 142.2 | 177 - 186 | 409.25  | 20    | L.KMVFDDLTL K.K         | Oxidation: 2                       |
|                     |              |      |       | 81 - 87   | 426.26  | 20.6  | R.LASYLER.V             |                                    |
|                     |              |      |       | 352 - 360 | 561.3   | 19.1  | H.EYNILLDIK.I           | Deamidated: 3                      |

|                   |                  |      |       |           |        |      |                                   |                                          |
|-------------------|------------------|------|-------|-----------|--------|------|-----------------------------------|------------------------------------------|
|                   |                  |      |       | 246 - 266 | 839.43 | 16.6 | K.YDAMAQENL<br>QKAKEQFEIQI<br>N.D | Deamidated: 6, 8,<br>15, 19, 21          |
|                   |                  |      |       | 81 - 89   | 553.89 | 66   | R.LASYLERVR.<br>S                 |                                          |
| PREDICTED:<br>K39 | gij4262390<br>24 | 56.9 | 378.2 | 112 - 120 | 568.32 | 22.8 | K.ETMKILNNR.<br>L                 | Oxidation: 3;<br>Deamidated: 8           |
|                   |                  |      |       | 476 - 487 | 703.92 | 21.5 | K.ICTITEEIKDG<br>K.V              | Carbamidomethyl:<br>2                    |
|                   |                  |      |       | 389 - 400 | 760.44 | 37.3 | R.QNREYEILLD<br>VK.S              |                                          |
|                   |                  |      |       | 128 - 133 | 388.25 | 36.6 | K.VQMLER.E                        |                                          |
|                   |                  |      |       | 121 - 127 | 425.76 | 46.7 | R.LANYLEK.V                       |                                          |
|                   |                  |      |       | 121 - 127 | 426.27 | 39.1 | R.LANYLEK.V                       | Deamidated: 3                            |
|                   |                  |      |       | 163 - 170 | 494.81 | 70   | A.TIEELQQK.I                      |                                          |
|                   |                  |      |       | 236 - 245 | 616.9  | 27.3 | Q.SLKEELLCLK<br>.N                | Carbamidomethyl:<br>8                    |
|                   |                  |      |       | 234 - 245 | 730.95 | 76.7 | Q.VQSLKEELL<br>CLK.N              | Carbamidomethyl:<br>10; Deamidated:<br>2 |
| PREDICTED:<br>K40 | gij4262379<br>61 | 47.4 | 968.2 | 178 - 185 | 498.8  | 28.2 | K.YESELSLR.Q                      |                                          |
|                   |                  |      |       | 382 - 390 | 599.81 | 24   | R.LECEINTYR.<br>G                 | Carbamidomethyl:<br>3; Deamidated: 6     |
|                   |                  |      |       | 169 - 175 | 404.25 | 53.8 | K.LAADDFR.S                       |                                          |
|                   |                  |      |       | 100 - 106 | 412.23 | 53.8 | R.LASYLEK.V                       |                                          |
|                   |                  |      |       | 92 - 99   | 512.82 | 36.4 | E.TMQFLNDR.L                      |                                          |
|                   |                  |      |       | 91 - 99   | 577.32 | 62.8 | K.ETMQFLNDR<br>.L                 |                                          |
|                   |                  |      |       | 91 - 99   | 577.83 | 32.8 | K.ETMQFLNDR<br>.L                 | Deamidated: 4                            |
|                   |                  |      |       | 91 - 99   | 585.29 | 58.5 | K.ETMQFLNDR<br>.L                 | Oxidation: 3                             |
|                   |                  |      |       | 91 - 99   | 585.78 | 34.4 | K.ETMQFLNDR<br>.L                 | Oxidation: 3;<br>Deamidated: 4           |
|                   |                  |      |       | 382 - 390 | 599.31 | 69.2 | R.LECEINTYR.<br>G                 | Carbamidomethyl:<br>3                    |
|                   |                  |      |       | 226 - 235 | 606.33 | 45.5 | K.SHEEEVNL<br>R.G                 |                                          |
|                   |                  |      |       | 176 - 185 | 606.36 | 58.9 | R.SKYESELSL<br>R.Q                |                                          |
|                   |                  |      |       | 380 - 390 | 712.85 | 55.8 | K.ARLECEINTY<br>R.G               | Carbamidomethyl:<br>5                    |
|                   |                  |      |       | 91 - 108  | 738.41 | 55.1 | K.ETMQFLNDR<br>LASYLEKVR.G        |                                          |
|                   |                  |      |       | 186 - 206 | 770.77 | 50.9 | R.QLVETDISGL<br>HGILGELTVCR.      | Carbamidomethyl:<br>20                   |

|                       |                  |      |      |           |        |       |                                       |                                      |
|-----------------------|------------------|------|------|-----------|--------|-------|---------------------------------------|--------------------------------------|
|                       |                  |      |      |           |        |       | S                                     |                                      |
|                       |                  |      |      | 242 - 256 | 822.48 | 53.5  | R.LSVELNTAPT<br>TDLNR.V               |                                      |
|                       |                  |      |      | 338 - 362 | 969.14 | 44.8  | E.AQYSSELAQI<br>QCLIDNVENQL<br>AEIR.C | Carbamidomethyl:<br>12               |
|                       |                  |      |      | 91 - 106  | 979.51 | 75.9  | K.ETMQFLNDR<br>LASYLEK.V              |                                      |
|                       |                  |      |      | 91 - 106  | 980    | 48    | K.ETMQFLNDR<br>LASYLEK.V              | Deamidated: 7                        |
| PREDIC<br>TED:<br>K82 | gij4262244<br>44 | 56.7 | 1207 | 196 - 205 | 403.92 | 30.9  | L.QDTLEGYKK<br>K.Y                    |                                      |
|                       |                  |      |      | 420 - 428 | 565.33 | 46.2  | R.RLLEGEEQR.<br>L                     |                                      |
|                       |                  |      |      | 420 - 429 | 621.85 | 22.8  | R.RLLEGEEQR<br>L.C                    |                                      |
|                       |                  |      |      | 138 - 147 | 631.38 | 27.8  | R.FLEQKNKLL<br>E.T                    |                                      |
|                       |                  |      |      | 138 - 144 | 453.78 | 35.3  | R.FLEQKNK.L                           |                                      |
|                       |                  |      |      | 409 - 420 | 473.95 | 67    | K.LGLDIEIATY<br>RR.L                  |                                      |
|                       |                  |      |      | 344 - 355 | 481.31 | 35.4  | R.LQQDIENVK<br>AQR.C                  |                                      |
|                       |                  |      |      | 421 - 428 | 487.3  | 59.9  | R.LLEGEEQR.L                          |                                      |
|                       |                  |      |      | 380 - 389 | 536.33 | 87.2  | K.LAGLEEALQ<br>K.A                    |                                      |
|                       |                  |      |      | 344 - 352 | 543.84 | 35.2  | R.LQQDIENVK.<br>A                     |                                      |
|                       |                  |      |      | 421 - 429 | 543.84 | 57.4  | R.LLEGEEQRL.<br>C                     |                                      |
|                       |                  |      |      | 331 - 339 | 550.85 | 57.5  | R.KNEILEINK.L                         |                                      |
|                       |                  |      |      | 400 - 408 | 564.31 | 40.6  | K.EYQEVMSK<br>.L                      |                                      |
|                       |                  |      |      | 390 - 399 | 589.26 | 63    | K.AKQDMACLL<br>K.E                    | Carbamidomethyl:<br>7                |
|                       |                  |      |      | 390 - 399 | 597.34 | 38.8  | K.AKQDMACLL<br>K.E                    | Carbamidomethyl:<br>7; Oxidation: 5  |
|                       |                  |      |      | 379 - 389 | 600.41 | 80.9  | C.KLAGLEEAL<br>QK.A                   |                                      |
|                       |                  |      |      | 409 - 419 | 632.41 | 104.3 | K.LGLDIEIATY<br>R.R                   |                                      |
|                       |                  |      |      | 380 - 391 | 635.91 | 73.9  | K.LAGLEEALQ<br>KAK.Q                  |                                      |
|                       |                  |      |      | 378 - 389 | 680.44 | 75.9  | K.CKLAGLEEA<br>LQK.A                  | Carbamidomethyl:<br>1                |
|                       |                  |      |      | 392 - 408 | 696.7  | 26.6  | K.QDMACLLKE<br>YQEVMSK.L              | Carbamidomethyl:<br>5; Deamidated: 1 |
|                       |                  |      |      | 138 - 149 | 745.94 | 62.7  | R.FLEQKNKLL<br>ETK.W                  |                                      |
|                       |                  |      |      | 390 - 408 | 762.71 | 77.7  | K.AKQDMACLL<br>KEYQEVMSK.<br>L        | Carbamidomethyl:<br>7                |
| PREDIC                | gij4262244       | 64.1 | 362  | 419 - 428 | 536.33 | 35.3  | K.LAELEGALQ                           |                                      |

|                       |                  |      |        |           |        |      |                          |                                      |
|-----------------------|------------------|------|--------|-----------|--------|------|--------------------------|--------------------------------------|
| TED:<br>K84           | 40               |      |        |           |        |      | Q.A                      |                                      |
|                       |                  |      |        | 333 - 341 | 590.34 | 20.8 | Q.YEEIARRSR.<br>A        |                                      |
|                       |                  |      |        | 177 - 186 | 631.38 | 27.8 | R.FLEQQNKLL<br>E.T       |                                      |
|                       |                  |      |        | 419 - 430 | 635.91 | 30.8 | K.LAELEGALQ<br>QAK.Q     |                                      |
|                       |                  |      |        | 417 - 428 | 680.32 | 37.6 | K.CKLAELEGA<br>LQQ.A     | Carbamidomethyl:<br>1                |
|                       |                  |      |        | 177 - 183 | 453.78 | 35.3 | R.FLEQQNK.L              |                                      |
|                       |                  |      |        | 319 - 330 | 643.42 | 79.5 | R.DLNVDGIIADI<br>K.A     |                                      |
|                       |                  |      |        | 41 - 53   | 662.87 | 32.1 | S.GPSFRGLSG<br>FGSR.S    |                                      |
|                       |                  |      |        | 177 - 188 | 745.94 | 62.7 | R.FLEQQNKLL<br>ETK.W     |                                      |
| PREDIC<br>TED:<br>K85 | gij4262266<br>34 | 56.3 | 1099.4 | 158 - 167 | 631.38 | 27.8 | R.FLEQQNKLL<br>E.T       |                                      |
|                       |                  |      |        | 352 - 356 | 633.35 | 16.5 | K.EEINE.L                |                                      |
|                       |                  |      |        | 60 - 71   | 661.85 | 18.7 | G.PGYRRLGGF<br>GSR.S     |                                      |
|                       |                  |      |        | 149 - 155 | 406.25 | 61.3 | R.FAAFIDK.V              |                                      |
|                       |                  |      |        | 158 - 164 | 453.78 | 35.3 | R.FLEQQNK.L              |                                      |
|                       |                  |      |        | 364 - 372 | 487.78 | 48.9 | R.LTAEVENAK.<br>Q        |                                      |
|                       |                  |      |        | 352 - 359 | 508.79 | 39.4 | K.EEINELNR.V             |                                      |
|                       |                  |      |        | 149 - 157 | 533.84 | 64.3 | R.FAAFIDKVR.<br>F        |                                      |
|                       |                  |      |        | 414 - 422 | 564.31 | 40.6 | K.EYQEVMSK<br>.L         |                                      |
|                       |                  |      |        | 360 - 369 | 579.38 | 47.2 | R.VIQRLTAEVE<br>.N       |                                      |
|                       |                  |      |        | 350 - 363 | 581.34 | 49.7 | R.TKEEINELNR<br>VIQR.L   |                                      |
|                       |                  |      |        | 404 - 413 | 589.26 | 63   | K.AKQDMACLL<br>K.E       | Carbamidomethyl:<br>7                |
|                       |                  |      |        | 404 - 413 | 597.34 | 38.8 | K.AKQDMACLL<br>K.E       | Carbamidomethyl:<br>7; Oxidation: 5  |
|                       |                  |      |        | 350 - 359 | 623.35 | 61.2 | R.TKEEINELNR<br>.V       |                                      |
|                       |                  |      |        | 423 - 433 | 625.39 | 38.4 | K.LGLDVEIATY<br>R.K      |                                      |
|                       |                  |      |        | 392 - 403 | 694.45 | 27.6 | K.CKLVGLEEA<br>LQK.A     | Carbamidomethyl:<br>1                |
|                       |                  |      |        | 406 - 422 | 696.7  | 26.6 | K.QDMACLLKE<br>YQEVMSK.L | Carbamidomethyl:<br>5; Deamidated: 1 |
|                       |                  |      |        | 360 - 372 | 735.91 | 72.6 | R.VIQRLTAEVE<br>NAK.Q    |                                      |



|                                    |                  |      |       |           |         |      |                                     |                                     |
|------------------------------------|------------------|------|-------|-----------|---------|------|-------------------------------------|-------------------------------------|
|                                    |                  |      |       | 158 - 169 | 745.94  | 62.7 | R.FLEQQNKLL<br>ETK.L                |                                     |
|                                    |                  |      |       | 404 - 422 | 762.71  | 77.7 | K.AKQDMACLL<br>KEYQEVMSK.<br>L      | Carbamidomethyl:<br>7               |
|                                    |                  |      |       | 178 - 196 | 791.07  | 35.1 | Q.CCESNLEPL<br>FNGYIETLRR.E         | Carbamidomethyl:<br>1, 2            |
|                                    |                  |      |       | 457 - 472 | 801.9   | 73.7 | R.SQGGVICGD<br>LGSTVPR.G            | Carbamidomethyl:<br>7               |
|                                    |                  |      |       | 158 - 176 | 814.12  | 72.1 | R.FLEQQNKLL<br>ETKLQFYQNR.<br>Q     |                                     |
| PREDIC<br>TED:<br>K1b              | gij4262244<br>20 | 60.9 | 199.8 | 390 - 408 | 1071.53 | 15.8 | E.ISELNLTIQRL<br>QAEIGNVK.K         | Deamidated: 5, 9,<br>17             |
|                                    |                  |      |       | 192 - 198 | 453.78  | 35.3 | R.FLEQQNQ.V                         |                                     |
|                                    |                  |      |       | 369 - 378 | 590.34  | 76.6 | K.YQELQITAG<br>R.H                  | Deamidated: 2                       |
|                                    |                  |      |       | 192 - 203 | 738.4   | 72.2 | R.FLEQQNQVL<br>QTK.W                |                                     |
| PREDIC<br>TED:<br>K79              | gij4262244<br>16 | 56.5 | 327.3 | 256 - 264 | 576.26  | 18.7 | R.LVEEMDFLR.<br>H                   |                                     |
|                                    |                  |      |       | 421 - 431 | 632.41  | 51.7 | K.LALDVEIATY<br>R.K                 |                                     |
|                                    |                  |      |       | 32 - 44   | 660.31  | 22.9 | T.SFSSVTMGG<br>FGSR.S               |                                     |
|                                    |                  |      |       | 44 - 67   | 785.43  | 15.8 | S.RSLYNLGG<br>KSISVNMAGGA<br>SAGR.V | Deamidated: 15                      |
|                                    |                  |      |       | 146 - 152 | 453.78  | 35.3 | R.FLEQQNK.V                         |                                     |
|                                    |                  |      |       | 292 - 303 | 665.42  | 98.1 | R.NLDLDSIIAE<br>VK.A                |                                     |
|                                    |                  |      |       | 226 - 237 | 674.91  | 84.8 | R.TAAENEFVV<br>LKK.D                |                                     |
| PREDIC<br>TED:<br>KAP10-<br>8-like | gij4262183<br>37 | 29.5 | 193   | 59 - 69   | 631.86  | 66.6 | R.LTLLCAPVSC<br>E.S                 | Carbamidomethyl:<br>5, 10           |
|                                    |                  |      |       | 59 - 69   | 631.86  | 66.6 | R.LTLLCAPVSC<br>E.S                 | Carbamidomethyl:<br>5, 10           |
|                                    |                  |      |       | 271 - 283 | 694.87  | 49.1 | R.LACGIPTSAP<br>ELC.C               | Carbamidomethyl:<br>3, 13           |
|                                    |                  |      |       | 271 - 284 | 774.89  | 77.3 | R.LACGIPTSAP<br>ELCC.-              | Carbamidomethyl:<br>3, 13, 14       |
|                                    |                  |      |       | 42 - 58   | 988.84  | 50.4 | S.CCEPPGCAP<br>SCCTPAPR.L           | Carbamidomethyl:<br>1, 2, 7, 11, 12 |
| PREDIC<br>TED:<br>KAP13-<br>1-like | gij4262171<br>67 | 17.5 | 444.9 | 149 - 160 | 634.76  | 19.4 | R.SGQSLSFQP<br>TCG.S                | Carbamidomethyl:<br>11              |

|                                    |                  |      |       |           |         |       |                                       |                                              |
|------------------------------------|------------------|------|-------|-----------|---------|-------|---------------------------------------|----------------------------------------------|
|                                    |                  |      |       | 149 - 164 | 862.41  | 49.8  | R.SGQSLSFQP<br>TCGSGFY.-              | Carbamidomethyl:<br>11; Deamidated:<br>8     |
|                                    |                  |      |       | 34 - 40   | 434.78  | 40.5  | R.SLQDHLR.T                           |                                              |
|                                    |                  |      |       | 14 - 20   | 434.78  | 40.5  | R.SLQDHLR.Y                           |                                              |
|                                    |                  |      |       | 14 - 20   | 435.27  | 55.7  | R.SLQDHLR.Y                           | Deamidated: 3                                |
|                                    |                  |      |       | 34 - 40   | 435.27  | 55.7  | R.SLQDHLR.T                           | Deamidated: 3                                |
|                                    |                  |      |       | 128 - 137 | 551.68  | 42.8  | R.SCYSVGCG<br>GR.G                    | Carbamidomethyl:<br>2, 7                     |
|                                    |                  |      |       | 137 - 145 | 576.32  | 49.3  | R.SSFYRPTFF.<br>S                     |                                              |
|                                    |                  |      |       | 137 - 146 | 619.82  | 27.6  | R.SSFYRPTFF<br>S.S                    |                                              |
|                                    |                  |      |       | 64 - 80   | 676.32  | 27    | R.TQTVVSSPC<br>QTSCYRPR.T             | Carbamidomethyl:<br>9, 13                    |
|                                    |                  |      |       | 137 - 148 | 741.39  | 31.3  | R.SSFYRPTFF<br>SSR.S                  |                                              |
|                                    |                  |      |       | 149 - 164 | 861.91  | 89.2  | R.SGQSLSFQP<br>TCGSGFY.-              | Carbamidomethyl:<br>11                       |
|                                    |                  |      |       | 149 - 164 | 862.42  | 104.8 | R.SGQSLSFQP<br>TCGSGFY.-              | Carbamidomethyl:<br>11; Deamidated:<br>3     |
|                                    |                  |      |       | 142 - 167 | 947.45  | 37.7  | R.LYGICGFP<br>VLSSGSGFCR<br>PTFFASR.S | Carbamidomethyl:<br>6, 18                    |
|                                    |                  |      |       | 97 - 115  | 1054.99 | 92    | R.TSTFSSPCQ<br>TTFPGSLAYR.<br>S       | Carbamidomethyl:<br>8; Deamidated: 9         |
| PREDIC<br>TED:<br>KAP16-<br>1-like | gij4262390<br>28 | 82.3 | 582.2 | 27 - 36   | 566.82  | 25    | R.GPVCLPSSC<br>R.S                    | Carbamidomethyl:<br>4, 9                     |
|                                    |                  |      |       | 540 - 554 | 855.4   | 17.6  | C.EPSCSEPSIC<br>QSATR.V               | Carbamidomethyl:<br>4, 10;<br>Deamidated: 11 |
|                                    |                  |      |       | 116 - 127 | 646.35  | 33.9  | K.ATICEPACPV<br>SS.C                  | Carbamidomethyl:<br>4, 8                     |
|                                    |                  |      |       | 555 - 565 | 666.39  | 35.8  | R.VSLVCEPICV<br>R.P                   | Carbamidomethyl:<br>5, 9                     |
|                                    |                  |      |       | 77 - 88   | 688.82  | 45.8  | T.TICEPACPVS<br>SR.A                  | Carbamidomethyl:<br>3, 7                     |
|                                    |                  |      |       | 76 - 88   | 739.37  | 36.4  | E.TTICEPACPV<br>SSR.A                 | Carbamidomethyl:<br>4, 8                     |
|                                    |                  |      |       | 382 - 401 | 764.34  | 30.7  | K.ATICESACPV<br>SSCAQPVYYK.<br>A      | Carbamidomethyl:<br>4, 8, 13                 |
|                                    |                  |      |       | 555 - 567 | 764.46  | 53.6  | R.VSLVCEPICV<br>RPV.C                 | Carbamidomethyl:<br>5, 9                     |
|                                    |                  |      |       | 89 - 102  | 766.85  | 47.1  | R.AQPVSCATI<br>CEPA.C                 | Carbamidomethyl:<br>6, 11                    |
|                                    |                  |      |       | 555 - 568 | 844.43  | 47.6  | R.VSLVCEPICV<br>RPVC.C                | Carbamidomethyl:<br>5, 9, 14                 |

|                                    |                   |      |       |           |         |       |                                   |                               |
|------------------------------------|-------------------|------|-------|-----------|---------|-------|-----------------------------------|-------------------------------|
|                                    |                   |      |       | 10 - 26   | 961.96  | 106.9 | K.CPSVPAISLC<br>STEVSCR.G         | Carbamidomethyl:<br>1, 10, 16 |
|                                    |                   |      |       | 422 - 441 | 1115.99 | 101.7 | E.ATICEPSCSV<br>SSCAQPVSYSK.<br>A | Carbamidomethyl:<br>4, 8, 13  |
| PREDIC<br>TED:<br>KAP27-<br>1-like | gij 4262171<br>69 | 21.8 | 142.3 | 44 - 54   | 698.33  | 65.1  | K.TWLLDNFPE<br>TC.R               | Carbamidomethyl:<br>11        |
|                                    |                   |      |       | 44 - 55   | 776.41  | 77.2  | K.TWLLDNFPE<br>TCR.E              | Carbamidomethyl:<br>11        |
| KAP3.3                             | gij 125661        | 10.5 | 574.2 | 8 - 26    | 725.34  | 16.2  | C.CSVPTSPAT<br>TICSSDKFCR.C       | Carbamidomethyl:<br>1, 12, 18 |
|                                    |                   |      |       | 27 - 37   | 644.28  | 61.4  | R.CGVCLPSTC<br>PH.T               | Carbamidomethyl:<br>1, 4, 9   |
|                                    |                   |      |       | 15 - 26   | 723.3   | 46.6  | P.ATTICSSDKF<br>CR.C              | Carbamidomethyl:<br>5, 11     |
|                                    |                   |      |       | 10 - 23   | 732.31  | 29.1  | S.VPTSPATTIC<br>SSDK.F            | Carbamidomethyl:<br>10        |
|                                    |                   |      |       | 9 - 23    | 775.85  | 35    | C.SVPTSPATTI<br>CSSDK.F           | Carbamidomethyl:<br>11        |
|                                    |                   |      |       | 27 - 40   | 837.39  | 53.8  | R.CGVCLPSTC<br>PHTVW.L            | Carbamidomethyl:<br>1, 4, 9   |
|                                    |                   |      |       | 8 - 23    | 855.88  | 61.9  | C.CSVPTSPAT<br>TICSSDK.F          | Carbamidomethyl:<br>1, 12     |
|                                    |                   |      |       | 6 - 23    | 992.44  | 71.4  | R.LCCSVPTSP<br>ATTICSSDK.F        | Carbamidomethyl:<br>2, 3, 14  |
|                                    |                   |      |       | 9 - 26    | 1007.41 | 82.9  | C.SVPTSPATTI<br>CSSDKFCR.C        | Carbamidomethyl:<br>11, 17    |
|                                    |                   |      |       | 6 - 24    | 1065.99 | 69.1  | R.LCCSVPTSP<br>ATTICSSDKF.C       | Carbamidomethyl:<br>2, 3, 14  |
|                                    |                   |      |       | 27 - 45   | 1113.51 | 46.8  | R.CGVCLPSTC<br>PHTVWLLQPT.<br>C   | Carbamidomethyl:<br>1, 4, 9   |
| KAP3.4                             | gij 125662        | 10.5 | 599.9 | 8 - 26    | 725.34  | 16.2  | C.CSVPTSPAT<br>TICSSDKFCR.C       | Carbamidomethyl:<br>1, 12, 18 |
|                                    |                   |      |       | 27 - 37   | 644.28  | 61.4  | R.CGVCLPSTC<br>PH.T               | Carbamidomethyl:<br>1, 4, 9   |
|                                    |                   |      |       | 15 - 26   | 723.3   | 46.6  | P.ATTICSSDKF<br>CR.C              | Carbamidomethyl:<br>5, 11     |
|                                    |                   |      |       | 10 - 23   | 732.31  | 29.1  | S.VPTSPATTIC<br>SSDK.F            | Carbamidomethyl:<br>10        |
|                                    |                   |      |       | 9 - 23    | 775.85  | 35    | C.SVPTSPATTI<br>CSSDK.F           | Carbamidomethyl:<br>11        |
|                                    |                   |      |       | 27 - 40   | 837.39  | 53.8  | R.CGVCLPSTC<br>PHTVW.F            | Carbamidomethyl:<br>1, 4, 9   |
|                                    |                   |      |       | 8 - 23    | 855.88  | 61.9  | C.CSVPTSPAT<br>TICSSDK.F          | Carbamidomethyl:<br>1, 12     |
|                                    |                   |      |       | 6 - 23    | 992.44  | 71.4  | R.LCCSVPTSP<br>ATTICSSDK.F        | Carbamidomethyl:<br>2, 3, 14  |
|                                    |                   |      |       | 9 - 26    | 1007.41 | 82.9  | C.SVPTSPATTI<br>CSSDKFCR.C        | Carbamidomethyl:<br>11, 17    |
|                                    |                   |      |       | 6 - 24    | 1065.99 | 69.1  | R.LCCSVPTSP<br>ATTICSSDKF.C       | Carbamidomethyl:<br>2, 3, 14  |
|                                    |                   |      |       | 27 - 45   | 1130.51 | 30.3  | R.CGVCLPSTC<br>PHTVWFLQPT.<br>C   | Carbamidomethyl:<br>1, 4, 9   |

|        |           |      |        |           |         |       |                                        |                                                |
|--------|-----------|------|--------|-----------|---------|-------|----------------------------------------|------------------------------------------------|
|        |           |      |        | 27 - 45   | 1131    | 42.2  | R.CGVCLPSTC<br>PHTVWFLQPT.<br>C        | Carbamidomethyl:<br>1, 4, 9;<br>Deamidated: 17 |
| KAP2.3 | gij125644 | 10.5 | 668.7  | 6 - 22    | 594.28  | 16.2  | C.GPTFSSLSC<br>GGCLQPR.Y               | Carbamidomethyl:<br>9, 13                      |
|        |           |      |        | 41 - 47   | 408.28  | 51.2  | R.PVTFVPR.C                            |                                                |
|        |           |      |        | 48 - 57   | 450.2   | 32.8  | R.CTRPICEPC<br>R.R                     | Carbamidomethyl:<br>1, 6, 9                    |
|        |           |      |        | 51 - 57   | 466.27  | 30.5  | R.PICEPCR.R                            | Carbamidomethyl:<br>3, 6                       |
|        |           |      |        | 124 - 131 | 514.72  | 47.6  | R.TFRTSPCC.-                           | Carbamidomethyl:<br>7, 8                       |
|        |           |      |        | 58 - 67   | 632.31  | 36.6  | R.RPVCCDPCS<br>L.Q                     | Carbamidomethyl:<br>4, 5, 8                    |
|        |           |      |        | 1 - 12    | 637.32  | 43.6  | -<br>.TGSCCGPTFS<br>SL.S               | Carbamidomethyl:<br>4, 5                       |
|        |           |      |        | 58 - 69   | 760.82  | 57.4  | R.RPVCCDPCS<br>LQE.G                   | Carbamidomethyl:<br>4, 5, 8                    |
|        |           |      |        | 9 - 22    | 763.35  | 40.3  | T.FSSLSCGGG<br>CLQPR.Y                 | Carbamidomethyl:<br>6, 10                      |
|        |           |      |        | 58 - 70   | 789.32  | 46    | R.RPVCCDPCS<br>LQEG.C                  | Carbamidomethyl:<br>4, 5, 8                    |
|        |           |      |        | 8 - 22    | 813.84  | 60.6  | P.TFSSLSCGG<br>GCLQPR.Y                | Carbamidomethyl:<br>7, 11                      |
|        |           |      |        | 58 - 77   | 842.35  | 45.1  | R.RPVCCDPCS<br>LQEGCCRPITC<br>.C       | Carbamidomethyl:<br>4, 5, 8, 14, 15, 20        |
|        |           |      |        | 1 - 17    | 846.32  | 34    | -<br>.TGSCCGPTFS<br>SLSCGGG.C          | Carbamidomethyl:<br>4, 5, 14                   |
|        |           |      |        | 1 - 22    | 1173.49 | 126.9 | -<br>.TGSCCGPTFS<br>SLSCGGGCLQ<br>PR.Y | Carbamidomethyl:<br>4, 5, 14, 18               |
| K85    | gij246276 | 56.3 | 4089.3 | 65 - 71   | 375.27  | 24.2  | R.IAVSGFR.A                            |                                                |
|        |           |      |        | 424 - 432 | 565.33  | 46.2  | R.RLLEGEEQR.<br>L                      |                                                |
|        |           |      |        | 229 - 237 | 570.35  | 19.1  | K.KDVDCAYLR.<br>K                      | Carbamidomethyl:<br>5                          |
|        |           |      |        | 424 - 433 | 621.85  | 22.8  | R.RLLEGEEQR<br>L.C                     |                                                |
|        |           |      |        | 142 - 151 | 631.38  | 27.8  | R.FLEQQNKLL<br>E.T                     |                                                |
|        |           |      |        | 336 - 340 | 633.35  | 16.5  | K.EEINE.L                              |                                                |
|        |           |      |        | 265 - 278 | 755.48  | 67.8  | Q.ILNAHISDTS<br>VIVK.M                 |                                                |
|        |           |      |        | 133 - 139 | 406.25  | 61.3  | R.FAAFIDK.V                            |                                                |
|        |           |      |        | 208 - 217 | 422.25  | 33.7  | K.KKYEEEEVAL<br>R.A                    |                                                |
|        |           |      |        | 382 - 393 | 429.92  | 30.7  | R.SKLAGLEEA<br>LQK.A                   | Deamidated: 11                                 |
|        |           |      |        | 142 - 148 | 453.78  | 35.3  | R.FLEQQNK.L                            |                                                |

|  |  |  |  |           |        |       |                        |                                     |
|--|--|--|--|-----------|--------|-------|------------------------|-------------------------------------|
|  |  |  |  | 413 - 424 | 473.95 | 67    | K.LGLDIEIATY<br>RR.L   |                                     |
|  |  |  |  | 270 - 278 | 481.35 | 33.8  | H.ISDTSVIVK.M          |                                     |
|  |  |  |  | 425 - 432 | 487.3  | 59.9  | R.LLEGEEQR.L           |                                     |
|  |  |  |  | 348 - 356 | 494.83 | 59.1  | R.LTAEIENAK.<br>C      |                                     |
|  |  |  |  | 210 - 217 | 504.82 | 56.5  | K.YEEEEVALR.A          |                                     |
|  |  |  |  | 230 - 237 | 506.27 | 45.7  | K.DVDCAYLR.K           | Carbamidomethyl:<br>4               |
|  |  |  |  | 307 - 314 | 506.29 | 57    | R.AEAESWYR.<br>S       |                                     |
|  |  |  |  | 336 - 343 | 508.79 | 39.4  | K.EEINELNR.V           |                                     |
|  |  |  |  | 296 - 304 | 519.77 | 75    | K.AQYDDIASR.<br>S      |                                     |
|  |  |  |  | 489 - 498 | 523.2  | 60.5  | R.ASSFSCGSS<br>R.S     | Carbamidomethyl:<br>6               |
|  |  |  |  | 133 - 141 | 533.84 | 64.3  | R.FAAFIDKVR.<br>F      |                                     |
|  |  |  |  | 384 - 393 | 536.33 | 87.2  | K.LAGLEEALQ<br>K.A     |                                     |
|  |  |  |  | 425 - 433 | 543.84 | 57.4  | R.LLEGEEQRL.<br>C      |                                     |
|  |  |  |  | 54 - 64   | 545.79 | 82    | R.SVSALGSCG<br>PR.I    | Carbamidomethyl:<br>8               |
|  |  |  |  | 439 - 448 | 547.78 | 43.7  | G.SVNVCVSSS<br>R.G     | Carbamidomethyl:<br>5               |
|  |  |  |  | 31 - 39   | 549.26 | 50.6  | R.CCISAAPYR.<br>G      | Carbamidomethyl:<br>1, 2            |
|  |  |  |  | 404 - 412 | 564.31 | 40.6  | K.EYQEVMSK<br>.L       |                                     |
|  |  |  |  | 209 - 217 | 568.86 | 76.3  | K.KYEEEEVALR.<br>A     |                                     |
|  |  |  |  | 16 - 26   | 577.82 | 56.1  | R.TFSSCSAVA<br>PK.T    | Carbamidomethyl:<br>5               |
|  |  |  |  | 334 - 347 | 581.34 | 49.7  | R.TKEEINELNR<br>VIQR.L |                                     |
|  |  |  |  | 154 - 161 | 585.3  | 44.9  | K.WQFYQNQR.<br>C       |                                     |
|  |  |  |  | 394 - 403 | 589.26 | 63    | K.AKQDMACLL<br>K.E     | Carbamidomethyl:<br>7               |
|  |  |  |  | 394 - 403 | 597.34 | 38.8  | K.AKQDMACLL<br>K.E     | Carbamidomethyl:<br>7; Oxidation: 5 |
|  |  |  |  | 383 - 393 | 600.41 | 80.9  | S.KLAGLEEAL<br>QK.A    |                                     |
|  |  |  |  | 307 - 316 | 613.82 | 54.5  | R.AEAESWYRS<br>K.C     |                                     |
|  |  |  |  | 334 - 343 | 623.35 | 61.2  | R.TKEEINELNR<br>.V     |                                     |
|  |  |  |  | 305 - 314 | 627.83 | 69.4  | R.SRAEAESWY<br>R.S     |                                     |
|  |  |  |  | 413 - 423 | 632.41 | 104.3 | K.LGLDIEIATY<br>R.R    |                                     |
|  |  |  |  | 384 - 395 | 635.91 | 73.9  | K.LAGLEEALQ<br>KAK.Q   |                                     |

|  |  |  |  |           |         |       |                                      |                                                       |
|--|--|--|--|-----------|---------|-------|--------------------------------------|-------------------------------------------------------|
|  |  |  |  | 296 - 306 | 641.31  | 37    | K.AQYDDIASR<br>SR.A                  |                                                       |
|  |  |  |  | 382 - 393 | 643.94  | 102.4 | R.SKLAGLEEA<br>LQK.A                 |                                                       |
|  |  |  |  | 218 - 229 | 674.91  | 84.8  | R.ATAENEFVV<br>LKK.D                 |                                                       |
|  |  |  |  | 4 - 15    | 693.33  | 49.6  | R.SYRISPGYS<br>VTR.T                 |                                                       |
|  |  |  |  | 396 - 412 | 696.7   | 26.6  | K.QDMACLLKE<br>YQEVMSK.L             | Carbamidomethyl:<br>5; Deamidated: 1                  |
|  |  |  |  | 108 - 119 | 700.9   | 54.2  | L.NLEIDPNAQC<br>VK.H                 | Carbamidomethyl:<br>10                                |
|  |  |  |  | 284 - 295 | 703.91  | 87.7  | R.DLNMDCVVA<br>EIK.A                 | Carbamidomethyl:<br>6                                 |
|  |  |  |  | 284 - 295 | 704.37  | 31.9  | R.DLNMDCVVA<br>EIK.A                 | Carbamidomethyl:<br>6; Deamidated: 3                  |
|  |  |  |  | 284 - 295 | 711.89  | 80.7  | R.DLNMDCVVA<br>EIK.A                 | Carbamidomethyl:<br>6; Oxidation: 4                   |
|  |  |  |  | 348 - 359 | 716.87  | 66.3  | R.LTAEIENAKC<br>QR.T                 | Carbamidomethyl:<br>10                                |
|  |  |  |  | 450 - 464 | 728.85  | 75.5  | G.GVACGGLTY<br>SSTAGR.Q              | Carbamidomethyl:<br>4                                 |
|  |  |  |  | 142 - 153 | 745.94  | 62.7  | R.FLEQQNKLL<br>ETK.W                 |                                                       |
|  |  |  |  | 394 - 412 | 762.71  | 77.7  | K.AKQDMACLL<br>KEYQEVMSK.<br>L       | Carbamidomethyl:<br>7                                 |
|  |  |  |  | 238 - 257 | 764.42  | 85.4  | R.KSDLEANVE<br>ALVEESNFLKR<br>.L     |                                                       |
|  |  |  |  | 161 - 179 | 791.04  | 52.7  | Q.RCCESNLEP<br>LFNGYIETLR.R          | Carbamidomethyl:<br>2, 3                              |
|  |  |  |  | 162 - 180 | 791.07  | 35.1  | R.CCESNLEPL<br>FNGYIETLRR.E          | Carbamidomethyl:<br>1, 2                              |
|  |  |  |  | 258 - 278 | 800.8   | 78    | R.LYDEEIQLN<br>AHISDTSVIVK.<br>M     |                                                       |
|  |  |  |  | 284 - 304 | 809.38  | 61.8  | R.DLNMDCVVA<br>EIKAQYDDIAS<br>R.S    | Carbamidomethyl:<br>6                                 |
|  |  |  |  | 284 - 304 | 815.09  | 52.9  | R.DLNMDCVVA<br>EIKAQYDDIAS<br>R.S    | Carbamidomethyl:<br>6; Oxidation: 4;<br>Deamidated: 3 |
|  |  |  |  | 433 - 448 | 855.43  | 123.7 | R.LCEGVGSVN<br>VCVSSSR.G             | Carbamidomethyl:<br>2, 11                             |
|  |  |  |  | 142 - 161 | 881.15  | 41.9  | R.FLEQQNKLL<br>ETKWQFYQNQ<br>R.C     |                                                       |
|  |  |  |  | 239 - 256 | 1003.98 | 95.4  | K.SDLEANVEA<br>LVEESNFLK.R           |                                                       |
|  |  |  |  | 362 - 381 | 1028.54 | 150.7 | K.LEAAVAEAE<br>QQGEAALNDA<br>R.S     |                                                       |
|  |  |  |  | 360 - 381 | 1143.07 | 168.4 | R.TKLEAAVAE<br>AEQQGEAALN<br>DAR.S   |                                                       |
|  |  |  |  | 465 - 488 | 1191.6  | 84.1  | R.QIASGPVAT<br>GGSITVLAPDS<br>CQPR.A | Carbamidomethyl:<br>21                                |

|  |  |  |  |           |         |      |                                      |                                          |
|--|--|--|--|-----------|---------|------|--------------------------------------|------------------------------------------|
|  |  |  |  | 465 - 488 | 1192.16 | 84.4 | R.QIASGPVAT<br>GGSITVLAPDS<br>CQPR.A | Carbamidomethyl:<br>21; Deamidated:<br>1 |
|--|--|--|--|-----------|---------|------|--------------------------------------|------------------------------------------|
