# Supplementary material for: Ionic liquid-assisted extraction of wool keratin proteins as an aid to MS identification
Source: Royal Society of Chemistry journal article supplement (doi:10.1039/c4ay01251h), 2014-01-01
Supplement: c4ay01251h2.pdf [file c4ay01251h2.pdf]

**Supplementary Table 2. Proteins and peptides identified in Urea/thourea extract Fraction 2.**

| Protein   | Accession    | Mol Wgt (kDa) | Protein Score           | Range                    | m/z meas. | Peptide score | Sequence                 | Modifications            |
|-----------|--------------|---------------|-------------------------|--------------------------|-----------|---------------|--------------------------|--------------------------|
| KAP 6.3   | gij284080746 | 7.6           | 301.4                   | 36 - 50                  | 566.24    | 83.5          | R.RLGCGYGSCYGS<br>SGFR.R | Carbamidomethyl:<br>4, 9 |
|           |              |               |                         | 37 - 51                  | 566.29    | 25.3          | R.LGCGYGSCYGS<br>GFRR.L  | Carbamidomethyl:<br>3, 8 |
|           |              |               |                         | 36 - 51                  | 618.27    | 42.4          | R.RLGCGYGSCYGS<br>SGFR.L | Carbamidomethyl:<br>4, 9 |
|           |              |               |                         | 52 - 63                  | 642.24    | 50.8          | R.LGCGYGCGYGY<br>G.C     | Carbamidomethyl:<br>3, 7 |
|           |              |               |                         | 37 - 50                  | 770.8     | 81.4          | R.LGCGYGSCYGS<br>GFR.R   | Carbamidomethyl:<br>3, 8 |
| K86-like  | gij312283584 | 53.2          | 7076.7                  | 34 - 39                  | 378.17    | 30.9          | R.GISCYR.G               | Carbamidomethyl:<br>4    |
|           |              |               |                         | 117 - 123                | 406.2     | 52.8          | R.FAAFIDK.V              |                          |
|           |              |               |                         | 40 - 48                  | 426.21    | 57.8          | R.GLTGGFGSR.S            |                          |
|           |              |               |                         | 476 - 484                | 445.73    | 98.3          | R.VGGSILGCK.K            | Carbamidomethyl:<br>8    |
|           |              |               |                         | 126 - 132                | 453.75    | 35.3          | R.FLEQQNK.L              |                          |
|           |              |               |                         | 397 - 408                | 473.93    | 60.9          | K.LGLDIEIATYRR.L         |                          |
|           |              |               |                         | 242 - 248                | 476.25    | 53.8          | R.LYEEEIR.V              |                          |
|           |              |               |                         | 138 - 144                | 484.78    | 49.4          | K.LQFYQNR.Q              |                          |
|           |              |               |                         | 138 - 144                | 485.29    | 39.8          | K.LQFYQNR.Q              | Deamidated: 6            |
|           |              |               |                         | 409 - 416                | 487.22    | 73.6          | R.LLEGEEQR.L             |                          |
|           |              |               |                         | 332 - 340                | 487.78    | 54.2          | R.LTAEVENAK.C            |                          |
|           |              |               |                         | 112 - 123                | 490.26    | 48.4          | K.CLNNRFAAFIDK.<br>V     | Carbamidomethyl:<br>1    |
|           |              |               |                         | 289 - 300                | 490.58    | 47.6          | R.SRAEAEWYRS<br>K.C      |                          |
|           |              |               |                         | 328 - 340                | 490.94    | 57.7          | R.VIQLTAEVENA<br>K.C     |                          |
|           |              |               |                         | 39 - 48                  | 504.24    | 30.1          | Y.RGLTGGFGSR.S           |                          |
|           |              |               |                         | 320 - 331                | 504.93    | 31.9          | K.EEINELNRVIQR.<br>L     |                          |
|           |              |               |                         | 291 - 298                | 506.22    | 60.9          | R.AEAEWYR.S              |                          |
|           |              |               |                         | 214 - 221                | 506.24    | 47.7          | K.DVDCAYLR.K             | Carbamidomethyl:<br>4    |
|           |              |               |                         | 11 - 24                  | 507.88    | 42.1          | P.AFSCVSACGPR<br>PGR.C   | Carbamidomethyl:<br>4, 8 |
|           |              |               |                         | 320 - 327                | 508.75    | 40.7          | K.EEINELNR.V             |                          |
| 476 - 485 | 509.76       | 44.8          | R.VGGSILGCKK.C          | Carbamidomethyl:<br>8    |           |               |                          |                          |
| 194 - 201 | 511.78       | 62.3          | R.YEEEIALR.A            |                          |           |               |                          |                          |
| 280 - 288 | 524.25       | 73.7          | K.AHYDDIASR.S           |                          |           |               |                          |                          |
| 34 - 48   | 529.94       | 37.5          | R.GISCYRGLTGGF<br>GSR.S | Carbamidomethyl:<br>4    |           |               |                          |                          |
| 117 - 125 | 533.78       | 70            | R.FAAFIDKVR.F           |                          |           |               |                          |                          |
| 368 - 377 | 536.29       | 87.2          | K.LAGLEEALQK.A          |                          |           |               |                          |                          |
| 409 - 417 | 543.8        | 53.2          | R.LLEGEEQRL.C           |                          |           |               |                          |                          |
| 241 - 248 | 554.32       | 49.9          | R.RLYEEEIR.V            |                          |           |               |                          |                          |
| 25 - 33   | 556.29       | 67.9          | R.CCITAAPYR.G           | Carbamidomethyl:<br>1, 2 |           |               |                          |                          |
| 388 - 396 | 564.25       | 51.7          | K.EYQEVMSK.L            |                          |           |               |                          |                          |
| 408 - 416 | 565.27       | 54.6          | R.RLLEGEEQR.L           |                          |           |               |                          |                          |
| 214 - 222 | 570.28       | 47.7          | K.DVDCAYLRK.S           | Carbamidomethyl:<br>4    |           |               |                          |                          |

|  |  |  |  |           |        |      |                            |                                      |
|--|--|--|--|-----------|--------|------|----------------------------|--------------------------------------|
|  |  |  |  | 213 - 221 | 570.31 | 68.3 | K.KDVDCAYLR.K              | Carbamidomethyl:<br>5                |
|  |  |  |  | 112 - 125 | 575.66 | 44.3 | K.CLNNRFAAFIDK<br>VR.F     | Carbamidomethyl:<br>1; Deamidated: 3 |
|  |  |  |  | 318 - 331 | 581.36 | 57.6 | R.TKEEINELNRVIQ<br>R.L     |                                      |
|  |  |  |  | 318 - 331 | 581.67 | 50   | R.TKEEINELNRVIQ<br>R.L     | Deamidated: 6                        |
|  |  |  |  | 124 - 137 | 582.65 | 27.6 | K.VRFLEQQNKLLE<br>TK.L     |                                      |
|  |  |  |  | 378 - 387 | 589.31 | 71.3 | K.AKQDMACLLK.E             | Carbamidomethyl:<br>7                |
|  |  |  |  | 193 - 201 | 589.81 | 64.6 | K.RYEEIIALR.A              |                                      |
|  |  |  |  | 202 - 212 | 596.83 | 83.1 | R.ATAENEFVALK.<br>K        |                                      |
|  |  |  |  | 8 - 24    | 596.94 | 62   | R.AVPAFSCVSAC<br>GPRPGR.C  | Carbamidomethyl:<br>7, 11            |
|  |  |  |  | 165 - 175 | 597.72 | 89.2 | R.EAECAEADSGR.<br>L        | Carbamidomethyl:<br>4                |
|  |  |  |  | 367 - 377 | 600.38 | 84.8 | C.KLAGLEEALQK.<br>A        |                                      |
|  |  |  |  | 263 - 272 | 605.76 | 41.2 | K.MDNSRDNLMD.<br>N         |                                      |
|  |  |  |  | 301 - 310 | 609.86 | 73.6 | K.CEEIKATVIR.H             | Carbamidomethyl:<br>1                |
|  |  |  |  | 97 - 111  | 610.3  | 58.1 | D.PNAQCVKQEEK<br>EQIK.C    | Carbamidomethyl:<br>5                |
|  |  |  |  | 332 - 347 | 612.01 | 40.4 | R.LTAEVENAKCQ<br>NSKLE.A   | Carbamidomethyl:<br>10               |
|  |  |  |  | 291 - 300 | 613.77 | 54.7 | R.AEAESWYRSK.C             |                                      |
|  |  |  |  | 25 - 39   | 616.6  | 35   | R.CCITAAPYRGIS<br>CYR.G    | Carbamidomethyl:<br>1, 2, 13         |
|  |  |  |  | 408 - 417 | 621.87 | 37.2 | R.RLLEGEEQRL.C             |                                      |
|  |  |  |  | 318 - 327 | 623.33 | 85.6 | R.TKEEINELNR.V             |                                      |
|  |  |  |  | 289 - 298 | 627.84 | 69.5 | R.SRAEAESWYR.S             |                                      |
|  |  |  |  | 269 - 279 | 630.41 | 98   | D.LNMDNIVAEIK.A            |                                      |
|  |  |  |  | 397 - 407 | 632.39 | 96.6 | K.LGLDIEIATYR.R            |                                      |
|  |  |  |  | 24 - 33   | 634.25 | 35.1 | G.RCCITAAPYR.G             | Carbamidomethyl:<br>2, 3             |
|  |  |  |  | 368 - 379 | 635.89 | 76.4 | K.LAGLEEALQKAK<br>.Q       |                                      |
|  |  |  |  | 93 - 103  | 643.84 | 65   | N.LEIDPNAQCVK.<br>Q        | Carbamidomethyl:<br>9                |
|  |  |  |  | 263 - 279 | 660.35 | 40.9 | K.MDNSRDNLMDN<br>IVAEIK.A  | Deamidated: 3                        |
|  |  |  |  | 202 - 213 | 660.82 | 87.3 | R.ATAENEFVALKK<br>.D       |                                      |
|  |  |  |  | 263 - 279 | 665.31 | 51.1 | K.MDNSRDNLMDN<br>IVAEIK.A  | Oxidation: 9                         |
|  |  |  |  | 366 - 377 | 680.42 | 93.2 | K.CKLAGLEEALQK<br>.A       | Carbamidomethyl:<br>1                |
|  |  |  |  | 49 - 61   | 685.77 | 33.5 | R.SVCGGFRAGSC<br>GR.S      | Carbamidomethyl:<br>3, 11            |
|  |  |  |  | 268 - 279 | 687.88 | 92   | R.DLNMDNIVAEIK.<br>A       |                                      |
|  |  |  |  | 268 - 279 | 695.88 | 77.7 | R.DLNMDNIVAEIK.<br>A       | Oxidation: 4                         |
|  |  |  |  | 380 - 396 | 696.37 | 30.4 | K.QDMACLLKEYQ<br>EVMNSK.L  | Carbamidomethyl:<br>5                |
|  |  |  |  | 268 - 279 | 696.88 | 37.9 | R.DLNMDNIVAEIK.<br>A       | Oxidation: 4;<br>Deamidated: 3, 6    |
|  |  |  |  | 175 - 192 | 698.4  | 43.3 | G.RLSSELNSLQEV<br>LEGYKK.R |                                      |

|  |  |  |  |           |        |       |                               |                                       |
|--|--|--|--|-----------|--------|-------|-------------------------------|---------------------------------------|
|  |  |  |  | 176 - 193 | 698.41 | 30.3  | R.LSSELNSLQEVLEGYKKR.Y        |                                       |
|  |  |  |  | 317 - 327 | 701.36 | 63.2  | R.RTKKEEINELNR.V              |                                       |
|  |  |  |  | 299 - 310 | 717.35 | 80.3  | R.SKCEEIKATVIR.H              | Carbamidomethyl: 3                    |
|  |  |  |  | 126 - 137 | 745.9  | 62.8  | R.FLEQQNKLLETK.L              |                                       |
|  |  |  |  | 126 - 137 | 746.4  | 57.5  | R.FLEQQNKLLETK.L              | Deamidated: 6                         |
|  |  |  |  | 368 - 387 | 749.43 | 37.7  | K.LAGLEEALQKAKQDMACLLK.E      | Carbamidomethyl: 17; Oxidation: 15    |
|  |  |  |  | 249 - 262 | 755.5  | 79.2  | R.VLQAHISDTSVIVK.M            |                                       |
|  |  |  |  | 280 - 298 | 761.65 | 38    | K.AHYDDIASRSRAEAESWYR.S       |                                       |
|  |  |  |  | 378 - 396 | 762.68 | 55.4  | K.AKQDMACLLKEYQEVMSK.L        | Carbamidomethyl: 7                    |
|  |  |  |  | 35 - 48   | 765.81 | 40.4  | G.ISCYRGLTGGFGSR.S            | Carbamidomethyl: 3                    |
|  |  |  |  | 378 - 396 | 768.04 | 42.5  | K.AKQDMACLLKEYQEVMSK.L        | Carbamidomethyl: 7; Oxidation: 16     |
|  |  |  |  | 378 - 396 | 773.37 | 34.6  | K.AKQDMACLLKEYQEVMSK.L        | Carbamidomethyl: 7; Oxidation: 5, 16  |
|  |  |  |  | 133 - 144 | 776.94 | 80.9  | K.LLETKLQFYQNR.Q              |                                       |
|  |  |  |  | 222 - 241 | 783.12 | 70.8  | R.KSDLEANVEALIQETDFLRR.L      |                                       |
|  |  |  |  | 332 - 345 | 796.4  | 89    | R.LTAEVENAKCQNSK.L            | Carbamidomethyl: 10                   |
|  |  |  |  | 332 - 345 | 796.84 | 46.1  | R.LTAEVENAKCQNSK.L            | Carbamidomethyl: 10; Deamidated: 7    |
|  |  |  |  | 268 - 288 | 801.74 | 68.2  | R.DLNMDNIVAEIKAHYDDIASR.S     |                                       |
|  |  |  |  | 268 - 288 | 807.43 | 50.1  | R.DLNMDNIVAEIKAHYDDIASR.S     | Oxidation: 4; Deamidated: 3           |
|  |  |  |  | 126 - 144 | 814.09 | 71    | R.FLEQQNKLLETKLQFYQNR.Q       |                                       |
|  |  |  |  | 242 - 262 | 814.79 | 54.3  | R.LYEEEIRVLQAHISDTSVIVK.M     |                                       |
|  |  |  |  | 145 - 164 | 824.77 | 39.8  | R.QCCESNLEPLFSGYIETLRR.E      | Carbamidomethyl: 2, 3                 |
|  |  |  |  | 417 - 432 | 847.39 | 132.1 | R.LCEGVGAVNVCVSSSR.G          | Carbamidomethyl: 2, 11                |
|  |  |  |  | 417 - 432 | 847.96 | 34.7  | R.LCEGVGAVNVCVSSSR.G          | Carbamidomethyl: 2, 11; Deamidated: 9 |
|  |  |  |  | 341 - 365 | 877.74 | 72.1  | K.CQNSKLEAAVTQAEQQGEAALADAK.C | Carbamidomethyl: 1                    |
|  |  |  |  | 409 - 432 | 883.4  | 57.5  | R.LLEGEEQRLCEGVGAVNVCVSSSR.G  | Carbamidomethyl: 10, 19               |
|  |  |  |  | 176 - 191 | 904.97 | 119.6 | R.LSSELNSLQEVLEGYK.K          |                                       |
|  |  |  |  | 176 - 191 | 905.49 | 89    | R.LSSELNSLQEVLEGYK.K          | Deamidated: 6                         |
|  |  |  |  | 176 - 191 | 905.95 | 36    | R.LSSELNSLQEVLEGYK.K          | Deamidated: 6, 9                      |
|  |  |  |  | 67 - 85   | 915.95 | 64.9  | R.SGGVGGLSPPCITTVSVNE.S       | Carbamidomethyl: 11                   |
|  |  |  |  | 176 - 192 | 968.98 | 75.6  | R.LSSELNSLQEVLEGYKK.R         |                                       |
|  |  |  |  | 176 - 192 | 969.53 | 40.3  | R.LSSELNSLQEVLEGYKK.R         | Deamidated: 6                         |
|  |  |  |  | 263 - 279 | 989.45 | 103.2 | K.MDNSRDLNMDN                 |                                       |

|          |              |      |        |           |         |       |                                                |                                            |
|----------|--------------|------|--------|-----------|---------|-------|------------------------------------------------|--------------------------------------------|
|          |              |      |        |           |         |       | IVAEIK.A                                       |                                            |
|          |              |      |        | 165 - 191 | 995.45  | 47.7  | R.EAECADSGR<br>LSSELNSLQEVLE<br>GYK.K          | Carbamidomethyl:<br>4                      |
|          |              |      |        | 263 - 288 | 1003.43 | 48.3  | K.MDNSRDNLMDN<br>IVAEIKAHYDDIAS<br>R.S         | Deamidated: 3, 8                           |
|          |              |      |        | 346 - 365 | 1007.52 | 138.6 | K.LEAAVTQAEQQ<br>GEAALADAK.C                   |                                            |
|          |              |      |        | 86 - 103  | 1013.02 | 82.8  | E.SLLTPLNLEIDPN<br>AQCVK.Q                     | Carbamidomethyl:<br>16                     |
|          |              |      |        | 223 - 240 | 1032.05 | 125.8 | K.SDLEANVEALIQ<br>ETDFLR.R                     |                                            |
|          |              |      |        | 222 - 240 | 1096.03 | 175.5 | R.KSDLEANVEALI<br>QETDFLR.R                    |                                            |
|          |              |      |        | 67 - 100  | 1150.89 | 50.1  | R.SGGVGGLSPPCI<br>TTVSVNESLLTPLN<br>LEIDPNAQ.C | Carbamidomethyl:<br>11; Deamidated:<br>26  |
|          |              |      |        | 145 - 163 | 1158.61 | 94.5  | R.QCCESNLEPLFS<br>GYIETLR.R                    | Carbamidomethyl:<br>2, 3                   |
| K31 var1 | gij999000013 | 46.6 | 6997.1 | 223 - 228 | 366.16  | 42.1  | R.VLNETR.A                                     |                                            |
|          |              |      |        | 135 - 141 | 404.2   | 53.7  | K.LAADDFR.T                                    |                                            |
|          |              |      |        | 66 - 72   | 412.24  | 59    | R.LASYLEK.V                                    |                                            |
|          |              |      |        | 6 - 12    | 423.76  | 45.2  | C.LPNLSFR.S                                    |                                            |
|          |              |      |        | 191 - 201 | 443.2   | 38.7  | K.SNHEEEVNTLR.<br>S                            |                                            |
|          |              |      |        | 202 - 209 | 451.77  | 30.7  | R.SQLGDRLN.V                                   |                                            |
|          |              |      |        | 184 - 190 | 452.73  | 35.1  | K.EELICKL.S                                    | Carbamidomethyl:<br>5                      |
|          |              |      |        | 152 - 163 | 467.6   | 48.4  | R.QLVESDINGLRR<br>.I                           | Deamidated: 8                              |
|          |              |      |        | 79 - 86   | 474.21  | 51.3  | R.ENAELESR.I                                   |                                            |
|          |              |      |        | 229 - 240 | 483.91  | 67.4  | R.AQYEALVETNR<br>R.D                           |                                            |
|          |              |      |        | 229 - 240 | 484.26  | 49    | R.AQYEALVETNR<br>R.D                           | Deamidated: 2                              |
|          |              |      |        | 79 - 90   | 486.94  | 40.3  | R.ENAELESRILER.<br>S                           |                                            |
|          |              |      |        | 144 - 151 | 490.76  | 56.6  | K.YETELGLR.Q                                   |                                            |
|          |              |      |        | 108 - 115 | 494.74  | 62.4  | R.TIEELQQK.I                                   |                                            |
|          |              |      |        | 126 - 134 | 500.33  | 72.4  | R.LVVQIDNAK.L                                  |                                            |
|          |              |      |        | 126 - 134 | 500.83  | 65.2  | R.LVVQIDNAK.L                                  | Deamidated: 7                              |
|          |              |      |        | 338 - 345 | 503.35  | 38.9  | E.YQVLLDVR.A                                   |                                            |
|          |              |      |        | 5 - 12    | 503.8   | 37    | F.CLPNLSFR.S                                   | Carbamidomethyl:<br>1                      |
|          |              |      |        | 58 - 65   | 512.78  | 29.9  | E.TMQFLNDR.L                                   |                                            |
|          |              |      |        | 135 - 143 | 518.76  | 41.7  | K.LAADDFRTK.Y                                  |                                            |
|          |              |      |        | 357 - 365 | 518.78  | 43.6  | R.GLLDSEDCK.L                                  | Carbamidomethyl:<br>8                      |
|          |              |      |        | 58 - 65   | 520.79  | 47.5  | E.TMQFLNDR.L                                   | Oxidation: 2                               |
|          |              |      |        | 100 - 107 | 537.81  | 50.6  | C.PNYQSYFR.T                                   |                                            |
|          |              |      |        | 66 - 74   | 539.83  | 76.2  | R.LASYLEKVR.Q                                  |                                            |
|          |              |      |        | 164 - 172 | 552.85  | 78.5  | R.ILDELTLCK.S                                  | Carbamidomethyl:<br>8                      |
|          |              |      |        | 241 - 248 | 555.25  | 54.6  | R.DVEEWYIR.Q                                   |                                            |
|          |              |      |        | 404 - 412 | 556.74  | 73.2  | R.CGPCNSYVR.-                                  | Carbamidomethyl:<br>1, 4                   |
|          |              |      |        | 404 - 412 | 557.21  | 73.1  | R.CGPCNSYVR.-                                  | Carbamidomethyl:<br>1, 4; Deamidated:<br>5 |
|          |              |      |        | 193 - 201 | 563.79  | 37    | N.HEEEEVNTLR.S                                 |                                            |

|  |  |  |  |           |        |      |                            |                                      |
|--|--|--|--|-----------|--------|------|----------------------------|--------------------------------------|
|  |  |  |  | 202 - 211 | 565.83 | 75.5 | R.SQLGDRLNVE.V             |                                      |
|  |  |  |  | 107 - 115 | 572.81 | 46.6 | F.RTIEELQQK.I              |                                      |
|  |  |  |  | 73 - 86   | 577.27 | 32.6 | K.VRQLERENAELE<br>SR.I     | Deamidated: 3                        |
|  |  |  |  | 57 - 65   | 577.29 | 63.1 | K.ETMQFLNDR.L              |                                      |
|  |  |  |  | 4 - 12    | 577.34 | 55.1 | N.FCLPNLSFR.S              | Carbamidomethyl:<br>2                |
|  |  |  |  | 57 - 65   | 577.79 | 43.9 | K.ETMQFLNDR.L              | Deamidated: 4                        |
|  |  |  |  | 334 - 347 | 577.99 | 52.9 | R.QNQEYQVLLDV<br>RAR.L     |                                      |
|  |  |  |  | 57 - 65   | 585.22 | 58.7 | K.ETMQFLNDR.L              | Oxidation: 3                         |
|  |  |  |  | 348 - 356 | 599.3  | 75.6 | R.LECEINTYR.G              | Carbamidomethyl:<br>3                |
|  |  |  |  | 142 - 151 | 605.32 | 68.6 | R.TKYETELGLR.Q             |                                      |
|  |  |  |  | 173 - 183 | 609.87 | 97.6 | K.SDLEAQVESLK.<br>E        |                                      |
|  |  |  |  | 181 - 190 | 616.9  | 40.9 | E.SLKEELICK.S              | Carbamidomethyl:<br>8                |
|  |  |  |  | 163 - 172 | 630.91 | 40.3 | R.RILDELTLCK.S             | Carbamidomethyl:<br>9                |
|  |  |  |  | 240 - 248 | 633.28 | 53.4 | R.RDVEEWYIR.Q              |                                      |
|  |  |  |  | 3 - 12    | 634.36 | 38.7 | F.NFCLPNLSFR.S             | Carbamidomethyl:<br>3                |
|  |  |  |  | 3 - 12    | 634.85 | 38.4 | F.NFCLPNLSFR.S             | Carbamidomethyl:<br>3; Deamidated: 1 |
|  |  |  |  | 46 - 56   | 644.8  | 56.8 | W.FCEGSFNGNEK<br>.E        | Carbamidomethyl:<br>2                |
|  |  |  |  | 229 - 239 | 647.36 | 88.2 | R.AQYEALVETNR.<br>R        |                                      |
|  |  |  |  | 91 - 101  | 650.33 | 45.9 | R.SQQQEPLVCPN.<br>Y        | Carbamidomethyl:<br>9                |
|  |  |  |  | 276 - 292 | 664.4  | 59.1 | R.RTVNALEVELQA<br>QHNL.R.D |                                      |
|  |  |  |  | 135 - 151 | 666.7  | 42   | K.LAADDFRTKYET<br>ELGLR.Q  |                                      |
|  |  |  |  | 223 - 239 | 669.35 | 64.4 | R.VLNETRAQYEAL<br>VETNR.R  |                                      |
|  |  |  |  | 126 - 143 | 673.05 | 61.3 | R.LVVQIDNAKLAA<br>DDFRTK.Y |                                      |
|  |  |  |  | 402 - 412 | 678.25 | 62.2 | R.SRCGPCNSYVR.<br>-        | Carbamidomethyl:<br>3, 6             |
|  |  |  |  | 294 - 305 | 682.31 | 85.3 | D.SLENTLTETEAR.<br>Y       |                                      |
|  |  |  |  | 329 - 345 | 692.39 | 42.7 | R.GDLERQSQEYQ<br>VLLDVR.A  |                                      |
|  |  |  |  | 152 - 163 | 700.36 | 44.8 | R.QLVESDINGLRR<br>.I       |                                      |
|  |  |  |  | 151 - 162 | 700.85 | 44   | L.RQLVESDINGLR.<br>R       | Deamidated: 9                        |
|  |  |  |  | 55 - 65   | 705.85 | 53.4 | N.EKETMQFLNDR.<br>L        |                                      |
|  |  |  |  | 108 - 125 | 711.05 | 64.2 | R.TIEELQQKILCAK<br>SENAR.L | Carbamidomethyl:<br>11               |
|  |  |  |  | 346 - 356 | 712.84 | 60.4 | R.ARLECEINTYR.<br>G        | Carbamidomethyl:<br>5                |
|  |  |  |  | 223 - 240 | 721.39 | 41.2 | R.VLNETRAQYEAL<br>VETNRR.D |                                      |
|  |  |  |  | 228 - 239 | 725.38 | 63.2 | T.RAQYEALVETNR<br>.R       |                                      |
|  |  |  |  | 229 - 240 | 725.86 | 35.9 | R.AQYEALVETNR<br>R.D       | Deamidated: 10                       |
|  |  |  |  | 179 - 190 | 730.94 | 73.1 | Q.VESLKEELICK.<br>S        | Carbamidomethyl:<br>10               |

|  |  |  |  |           |        |       |                                 |                                                      |
|--|--|--|--|-----------|--------|-------|---------------------------------|------------------------------------------------------|
|  |  |  |  | 75 - 86   | 737.36 | 53.4  | R.QLERENAELES<br>R.I            |                                                      |
|  |  |  |  | 75 - 86   | 737.8  | 57.7  | R.QLERENAELES<br>R.I            | Deamidated: 1                                        |
|  |  |  |  | 57 - 74   | 738.4  | 85.8  | K.ETMQFLNDRLA<br>SYLEKVR.Q      |                                                      |
|  |  |  |  | 293 - 305 | 739.86 | 110.7 | R.DSLENTLTETEA<br>R.Y           |                                                      |
|  |  |  |  | 293 - 305 | 740.35 | 84.4  | R.DSLENTLTETEA<br>R.Y           | Deamidated: 5                                        |
|  |  |  |  | 57 - 74   | 743.73 | 32.9  | K.ETMQFLNDRLA<br>SYLEKVR.Q      | Oxidation: 3                                         |
|  |  |  |  | 1 - 12    | 751.34 | 76.6  | -<br>.SFNFCLPNLSFR.<br>S        | Carbamidomethyl:<br>5                                |
|  |  |  |  | 1 - 12    | 751.91 | 54.9  | -<br>.SFNFCLPNLSFR.<br>S        | Carbamidomethyl:<br>5; Deamidated: 3                 |
|  |  |  |  | 334 - 345 | 752.95 | 94.4  | R.QNQEYQVLLDV<br>R.A            |                                                      |
|  |  |  |  | 334 - 345 | 753.42 | 40.6  | R.QNQEYQVLLDV<br>R.A            | Deamidated: 3                                        |
|  |  |  |  | 280 - 292 | 760.93 | 66.3  | N.ALEVELQAQHNL<br>R.D           |                                                      |
|  |  |  |  | 202 - 222 | 761.77 | 25.3  | R.SQLGDRLNVEV<br>DAAPTVDLNR.V   | Deamidated: 2                                        |
|  |  |  |  | 121 - 134 | 778.89 | 64.5  | K.SENARLVVQIDN<br>AK.L          |                                                      |
|  |  |  |  | 208 - 228 | 780.07 | 46.8  | R.LNVEVDAAPTVD<br>LNRVLNETR.A   |                                                      |
|  |  |  |  | 108 - 120 | 787.45 | 73.6  | R.TIEELQQKILCAK<br>.S           | Carbamidomethyl:<br>11                               |
|  |  |  |  | 53 - 65   | 791.34 | 57.9  | N.GNEKETMQFLN<br>DR.L           |                                                      |
|  |  |  |  | 380 - 401 | 805.07 | 56.2  | K.TITPCISSPCAPA<br>APCTPCVPR.S  | Carbamidomethyl:<br>5, 10, 16, 19                    |
|  |  |  |  | 142 - 162 | 812.1  | 30.8  | R.TKYETELGLRQL<br>VEDINGLR.R    |                                                      |
|  |  |  |  | 208 - 222 | 813.43 | 102.5 | R.LNVEVDAAPTVD<br>LNR.V         |                                                      |
|  |  |  |  | 256 - 276 | 830.76 | 32.9  | K.QVVSSEQLQS<br>CQTEIILRR.T     | Carbamidomethyl:<br>12                               |
|  |  |  |  | 214 - 228 | 834.92 | 43.4  | D.AAPTVDLNRVLN<br>ETR.A         |                                                      |
|  |  |  |  | 229 - 248 | 847.4  | 25.5  | R.AQYEALVETNR<br>RDVEEWYIR.Q    |                                                      |
|  |  |  |  | 357 - 379 | 861.02 | 67.6  | R.GLLDSEDCKLPC<br>NPCATTNACGK.T | Carbamidomethyl:<br>8, 12, 15, 21                    |
|  |  |  |  | 357 - 379 | 861.36 | 38    | R.GLLDSEDCKLPC<br>NPCATTNACGK.T | Carbamidomethyl:<br>8, 12, 15, 21;<br>Deamidated: 13 |
|  |  |  |  | 73 - 86   | 864.89 | 63.8  | K.VRQLERENAELE<br>SR.I          |                                                      |
|  |  |  |  | 87 - 107  | 885.73 | 69.3  | R.ILERSQQQEPLV<br>CPNYQSYFR.T   | Carbamidomethyl:<br>13                               |
|  |  |  |  | 306 - 328 | 894.13 | 25.6  | R.YSCQLNQVQSLI<br>SNVESQLAEIR.G | Carbamidomethyl:<br>3; Deamidated: 9                 |
|  |  |  |  | 126 - 141 | 894.46 | 114.4 | R.LVVQIDNAKLAA<br>DDFR.T        |                                                      |
|  |  |  |  | 58 - 72   | 914.97 | 89.7  | E.TMQFLNDRLAS<br>YLEK.V         |                                                      |
|  |  |  |  | 57 - 71   | 915.42 | 54.1  | K.ETMQFLNDRLA<br>SYLE.K         |                                                      |
|  |  |  |  | 277 - 292 | 917.99 | 119.9 | R.TVNALEVELQAQ<br>HNL.R.D       |                                                      |

|              |              |    |        |           |         |       |                                             |                                              |
|--------------|--------------|----|--------|-----------|---------|-------|---------------------------------------------|----------------------------------------------|
|              |              |    |        | 277 - 292 | 918.46  | 65    | R.TVNALEVELQAA<br>HNL.R.D                   | Deamidated: 3                                |
|              |              |    |        | 277 - 292 | 918.47  | 86.3  | R.TVNALEVELQAA<br>HNL.R.D                   | Deamidated: 10                               |
|              |              |    |        | 241 - 255 | 976.47  | 63.8  | R.DVEEWYIRQTE<br>ELNK.Q                     |                                              |
|              |              |    |        | 57 - 72   | 979.47  | 57.9  | K.ETMQFLNDRLA<br>SYLEK.V                    |                                              |
|              |              |    |        | 57 - 72   | 979.98  | 64.9  | K.ETMQFLNDRLA<br>SYLEK.V                    | Deamidated: 7                                |
|              |              |    |        | 57 - 72   | 987.46  | 36.8  | K.ETMQFLNDRLA<br>SYLEK.V                    | Oxidation: 3                                 |
|              |              |    |        | 164 - 180 | 988.5   | 46.1  | R.ILDELTLCKSDLE<br>AQVE.S                   | Carbamidomethyl:<br>8                        |
|              |              |    |        | 202 - 228 | 998.85  | 36    | R.SQLGDRLNVEV<br>DAAPTVDLNRVLN<br>ETR.A     |                                              |
|              |              |    |        | 173 - 190 | 1052.61 | 104.4 | K.SDLEAQVESLKE<br>ELICLK.S                  | Carbamidomethyl:<br>16                       |
|              |              |    |        | 164 - 190 | 1064.23 | 28    | R.ILDELTLCKSDLE<br>AQVESLKEELICLK<br>.S     | Carbamidomethyl:<br>8, 25;<br>Deamidated: 15 |
|              |              |    |        | 28 - 56   | 1067.79 | 46.2  | G.TTLPGACNIPAN<br>VGSCNWFCEGSF<br>NGNEK.E   | Carbamidomethyl:<br>7, 16, 20                |
|              |              |    |        | 91 - 107  | 1072.47 | 86.4  | R.SQQQEPLVCPN<br>YQSYFR.T                   | Carbamidomethyl:<br>9                        |
|              |              |    |        | 91 - 107  | 1072.97 | 60.2  | R.SQQQEPLVCPN<br>YQSYFR.T                   | Carbamidomethyl:<br>9; Deamidated: 4         |
|              |              |    |        | 306 - 333 | 1084.23 | 127.8 | R.YSCQLNQVQSLI<br>SNVESQLAEIRGD<br>LER.Q    | Carbamidomethyl:<br>3; Deamidated: 9         |
|              |              |    |        | 277 - 305 | 1099.23 | 38.1  | R.TVNALEVELQAA<br>HNL.RD.SLENTLTE<br>TEAR.Y | Deamidated: 12                               |
|              |              |    |        | 202 - 222 | 1141.56 | 82.6  | R.SQLGDRLNVEV<br>DAAPTVDLNR.V               |                                              |
|              |              |    |        | 202 - 222 | 1142.06 | 34    | R.SQLGDRLNVEV<br>DAAPTVDLNR.V               | Deamidated: 20                               |
| K33a<br>var1 | gij999000014 | 46 | 6518.1 | 223 - 228 | 366.16  | 42.1  | H.VLNETR.A                                  |                                              |
|              |              |    |        | 135 - 141 | 412.21  | 62.1  | K.LASDDFR.T                                 |                                              |
|              |              |    |        | 66 - 72   | 412.24  | 59    | R.LASYLEK.V                                 |                                              |
|              |              |    |        | 6 - 12    | 423.76  | 45.2  | C.LPNLSFR.S                                 |                                              |
|              |              |    |        | 79 - 85   | 430.72  | 35.8  | R.ENAELER.R                                 |                                              |
|              |              |    |        | 393 - 403 | 450.17  | 45.7  | R.TRCGPCNTFVH.<br>-                         | Carbamidomethyl:<br>3, 6                     |
|              |              |    |        | 202 - 209 | 451.77  | 30.7  | R.SQLGDRLN.V                                |                                              |
|              |              |    |        | 184 - 190 | 452.73  | 35.1  | K.EELICLK.Q                                 | Carbamidomethyl:<br>5                        |
|              |              |    |        | 152 - 163 | 461.96  | 33.1  | R.QLVEADLNGLR<br>R.I                        |                                              |
|              |              |    |        | 396 - 403 | 466.23  | 44.6  | C.GPCNTFVH.-                                | Carbamidomethyl:<br>3                        |
|              |              |    |        | 229 - 240 | 483.91  | 67.4  | R.AQYEALVETNR<br>R.D                        |                                              |
|              |              |    |        | 229 - 240 | 484.26  | 49    | R.AQYEALVETNR<br>R.D                        | Deamidated: 2                                |
|              |              |    |        | 108 - 115 | 494.74  | 62.4  | R.TIEELQQK.I                                |                                              |
|              |              |    |        | 144 - 151 | 498.78  | 54.4  | K.YETEVSLR.Q                                |                                              |
|              |              |    |        | 126 - 134 | 500.33  | 72.4  | R.LVVQIDNAK.L                               |                                              |
|              |              |    |        | 126 - 134 | 500.83  | 65.2  | R.LVVQIDNAK.L                               | Deamidated: 7                                |
|              |              |    |        | 338 - 345 | 503.35  | 38.9  | E.YQVLLDVR.A                                |                                              |

|  |  |  |  |           |        |      |                            |                                            |
|--|--|--|--|-----------|--------|------|----------------------------|--------------------------------------------|
|  |  |  |  | 5 - 12    | 503.8  | 37   | F.CLPNLSFR.S               | Carbamidomethyl:<br>1                      |
|  |  |  |  | 58 - 65   | 512.78 | 29.9 | E.TMQFLNDR.L               |                                            |
|  |  |  |  | 357 - 365 | 518.78 | 43.6 | R.GLLDSEDCK.L              | Carbamidomethyl:<br>8                      |
|  |  |  |  | 58 - 65   | 520.79 | 47.5 | E.TMQFLNDR.L               | Oxidation: 2                               |
|  |  |  |  | 135 - 143 | 526.82 | 26.4 | K.LASDDFRTK.Y              |                                            |
|  |  |  |  | 100 - 107 | 537.81 | 50.6 | C.PNYQSYFR.T               |                                            |
|  |  |  |  | 66 - 74   | 539.83 | 76.2 | R.LASYLEKVR.Q              |                                            |
|  |  |  |  | 395 - 403 | 546.23 | 62.4 | R.CGPCNTFVH.-              | Carbamidomethyl:<br>1, 4                   |
|  |  |  |  | 395 - 403 | 546.75 | 59.6 | R.CGPCNTFVH.-              | Carbamidomethyl:<br>1, 4; Deamidated:<br>5 |
|  |  |  |  | 164 - 172 | 552.85 | 78.5 | R.ILDELTLCK.S              | Carbamidomethyl:<br>8                      |
|  |  |  |  | 241 - 248 | 555.25 | 54.6 | R.DVEEWYIR.Q               |                                            |
|  |  |  |  | 193 - 201 | 563.31 | 45.3 | N.HEQEVNLR.S               |                                            |
|  |  |  |  | 193 - 201 | 563.79 | 37   | N.HEQEVNLR.S               | Deamidated: 3                              |
|  |  |  |  | 202 - 211 | 565.83 | 75.5 | R.SQLGDRLNVE.V             |                                            |
|  |  |  |  | 107 - 115 | 572.81 | 46.6 | F.RTIEELQQK.I              |                                            |
|  |  |  |  | 116 - 125 | 574.35 | 38.9 | K.ILCGKSENAR.L             | Carbamidomethyl:<br>3                      |
|  |  |  |  | 57 - 65   | 577.29 | 63.1 | K.ETMQFLNDR.L              |                                            |
|  |  |  |  | 4 - 12    | 577.34 | 55.1 | N.FCLPNLSFR.S              | Carbamidomethyl:<br>2                      |
|  |  |  |  | 57 - 65   | 577.79 | 43.9 | K.ETMQFLNDR.L              | Deamidated: 4                              |
|  |  |  |  | 334 - 347 | 577.99 | 52.9 | R.QNQEYQVLLDV<br>RAR.L     |                                            |
|  |  |  |  | 57 - 65   | 585.22 | 58.7 | K.ETMQFLNDR.L              | Oxidation: 3                               |
|  |  |  |  | 348 - 356 | 599.3  | 75.6 | R.LECEINTYR.G              | Carbamidomethyl:<br>3                      |
|  |  |  |  | 142 - 151 | 613.35 | 70.6 | R.TKYETEVSRLR.Q            |                                            |
|  |  |  |  | 152 - 162 | 614.34 | 68   | R.QLVEADLNGLR.<br>R        |                                            |
|  |  |  |  | 152 - 162 | 614.88 | 65.7 | R.QLVEADLNGLR.<br>R        | Deamidated: 8                              |
|  |  |  |  | 181 - 190 | 616.9  | 40.9 | E.SLKEELICK.Q              | Carbamidomethyl:<br>8                      |
|  |  |  |  | 163 - 172 | 630.91 | 40.3 | R.RILDELTLCK.S             | Carbamidomethyl:<br>9                      |
|  |  |  |  | 240 - 248 | 633.28 | 53.4 | R.RDVEEWYIR.Q              |                                            |
|  |  |  |  | 3 - 12    | 634.36 | 38.7 | F.NFCLPNLSFR.S             | Carbamidomethyl:<br>3                      |
|  |  |  |  | 3 - 12    | 634.85 | 38.4 | F.NFCLPNLSFR.S             | Carbamidomethyl:<br>3; Deamidated: 1       |
|  |  |  |  | 46 - 56   | 644.8  | 56.8 | W.FCEGSFNGNEK<br>.E        | Carbamidomethyl:<br>2                      |
|  |  |  |  | 229 - 239 | 647.36 | 88.2 | R.AQYEALVETNR.<br>R        |                                            |
|  |  |  |  | 91 - 101  | 650.33 | 45.9 | R.SQQQEPLVCPN.<br>Y        | Carbamidomethyl:<br>9                      |
|  |  |  |  | 276 - 292 | 664.4  | 59.1 | R.RTVNALEVELQA<br>QHNL.R.D |                                            |
|  |  |  |  | 223 - 239 | 669.35 | 64.4 | H.VLNETRAQYEAL<br>VETNR.R  |                                            |
|  |  |  |  | 393 - 403 | 675.29 | 51   | R.TRCGPCNTFVH.<br>-        | Carbamidomethyl:<br>3, 6; Deamidated:<br>7 |
|  |  |  |  | 126 - 143 | 678.42 | 53.5 | R.LVVQIDNAKLAS<br>DDFRTK.Y |                                            |

|  |  |  |  |           |        |       |                                |                                       |
|--|--|--|--|-----------|--------|-------|--------------------------------|---------------------------------------|
|  |  |  |  | 294 - 305 | 682.31 | 85.3  | D.SLENTLTETEAR.<br>Y           |                                       |
|  |  |  |  | 191 - 201 | 684.3  | 59.6  | K.QNHEQEVNTRLR.<br>S           |                                       |
|  |  |  |  | 191 - 201 | 685.79 | 44.5  | K.QNHEQEVNTRLR.<br>S           | Deamidated: 1, 2,<br>5                |
|  |  |  |  | 329 - 345 | 702.4  | 57.5  | R.SDLERQNQEYQ<br>VLLDVR.A      |                                       |
|  |  |  |  | 55 - 65   | 705.85 | 53.4  | N.EKETMQFLNDR.<br>L            |                                       |
|  |  |  |  | 108 - 125 | 706.38 | 59.6  | R.TIEELQQKILCGK<br>SENAR.L     | Carbamidomethyl:<br>11                |
|  |  |  |  | 108 - 125 | 706.66 | 43.6  | R.TIEELQQKILCGK<br>SENAR.L     | Carbamidomethyl:<br>11; Deamidated: 7 |
|  |  |  |  | 346 - 356 | 712.84 | 60.4  | R.ARLECEINTYR.<br>G            | Carbamidomethyl:<br>5                 |
|  |  |  |  | 223 - 240 | 721.39 | 41.2  | H.VLNETRAQYEAL<br>VETNRR.D     |                                       |
|  |  |  |  | 228 - 239 | 725.38 | 63.2  | T.RAQYEALVETNR<br>.R           |                                       |
|  |  |  |  | 229 - 240 | 725.86 | 35.9  | R.AQYEALVETNR<br>R.D           | Deamidated: 10                        |
|  |  |  |  | 179 - 190 | 730.94 | 73.1  | R.VESLKEELICK.<br>Q            | Carbamidomethyl:<br>10                |
|  |  |  |  | 57 - 74   | 738.4  | 85.8  | K.ETMQFLNDRLA<br>SYLEKVR.Q     |                                       |
|  |  |  |  | 293 - 305 | 739.86 | 110.7 | R.DSLENTLTETEA<br>R.Y          |                                       |
|  |  |  |  | 293 - 305 | 740.35 | 84.4  | R.DSLENTLTETEA<br>R.Y          | Deamidated: 5                         |
|  |  |  |  | 57 - 74   | 743.73 | 32.9  | K.ETMQFLNDRLA<br>SYLEKVR.Q     | Oxidation: 3                          |
|  |  |  |  | 1 - 12    | 751.34 | 76.6  | -<br>.SFNFCLPNLSFR.<br>S       | Carbamidomethyl:<br>5                 |
|  |  |  |  | 1 - 12    | 751.91 | 54.9  | -<br>.SFNFCLPNLSFR.<br>S       | Carbamidomethyl:<br>5; Deamidated: 3  |
|  |  |  |  | 334 - 345 | 752.95 | 94.4  | R.QNQEYQVLLDV<br>R.A           |                                       |
|  |  |  |  | 334 - 345 | 753.42 | 40.6  | R.QNQEYQVLLDV<br>R.A           | Deamidated: 3                         |
|  |  |  |  | 280 - 292 | 760.93 | 66.3  | N.ALEVELQAQHNL<br>R.D          |                                       |
|  |  |  |  | 208 - 228 | 773.7  | 59.8  | R.LNVEVDAAPTVD<br>LNHVLNETR.A  |                                       |
|  |  |  |  | 121 - 134 | 778.89 | 64.5  | K.SENARLVVQIDN<br>AK.L         |                                       |
|  |  |  |  | 108 - 120 | 780.44 | 72    | R.TIEELQQKILCGK<br>.S          | Carbamidomethyl:<br>11                |
|  |  |  |  | 53 - 65   | 791.34 | 57.9  | N.GNEKETMQFLN<br>DR.L          |                                       |
|  |  |  |  | 142 - 162 | 812.12 | 46.7  | R.TKYETEVSRLRQL<br>VEADLNGLR.R |                                       |
|  |  |  |  | 256 - 276 | 820.79 | 41.4  | K.QVVSSSEQLQS<br>CQAEIILRR.T   | Carbamidomethyl:<br>12                |
|  |  |  |  | 214 - 228 | 825.46 | 113.5 | D.AAPTVDLNHVLN<br>ETR.A        |                                       |
|  |  |  |  | 229 - 248 | 847.4  | 25.5  | R.AQYEALVETNR<br>RDVEEWYIR.Q   |                                       |
|  |  |  |  | 87 - 107  | 885.73 | 69.3  | R.ILERSQQQEPLV<br>CPNYQSYFR.T  | Carbamidomethyl:<br>13                |
|  |  |  |  | 164 - 178 | 888.45 | 127   | R.ILDELTLCKSDLE<br>AR.V        | Carbamidomethyl:<br>8                 |
|  |  |  |  | 126 - 141 | 902.52 | 124.3 | R.LVVQIDNAKLAS                 |                                       |

|      |              |      |        |           |         |       |                                           |                                      |
|------|--------------|------|--------|-----------|---------|-------|-------------------------------------------|--------------------------------------|
|      |              |      |        |           |         |       | DDFR.T                                    |                                      |
|      |              |      |        | 58 - 72   | 914.97  | 89.7  | E.TMQFLNDRLAS<br>YLEK.V                   |                                      |
|      |              |      |        | 57 - 71   | 915.42  | 54.1  | K.ETMQFLNDRLA<br>SYLE.K                   |                                      |
|      |              |      |        | 277 - 292 | 917.99  | 119.9 | R.TVNALEVELQAA<br>HNL.R.D                 |                                      |
|      |              |      |        | 277 - 292 | 918.46  | 65    | R.TVNALEVELQAA<br>HNL.R.D                 | Deamidated: 3                        |
|      |              |      |        | 277 - 292 | 918.47  | 86.3  | R.TVNALEVELQAA<br>HNL.R.D                 | Deamidated: 10                       |
|      |              |      |        | 179 - 201 | 937.11  | 62.1  | R.VESLKEELICK<br>QNHEQEVNLR.S             | Carbamidomethyl:<br>10               |
|      |              |      |        | 269 - 292 | 939.52  | 63    | Q.AEIIELRRTVNAL<br>EVELQAQHNL.R.D         | Deamidated: 11                       |
|      |              |      |        | 241 - 255 | 976.47  | 63.8  | R.DVEEWYIRQTE<br>ELNK.Q                   |                                      |
|      |              |      |        | 57 - 72   | 979.47  | 57.9  | K.ETMQFLNDRLA<br>SYLEK.V                  |                                      |
|      |              |      |        | 57 - 72   | 979.98  | 64.9  | K.ETMQFLNDRLA<br>SYLEK.V                  | Deamidated: 7                        |
|      |              |      |        | 57 - 72   | 987.46  | 36.8  | K.ETMQFLNDRLA<br>SYLEK.V                  | Oxidation: 3                         |
|      |              |      |        | 202 - 228 | 992.49  | 97.3  | R.SQLGDRLNVEV<br>DAAPTVDLNHVLN<br>ETR.A   |                                      |
|      |              |      |        | 202 - 228 | 992.83  | 39.2  | R.SQLGDRLNVEV<br>DAAPTVDLNHVLN<br>ETR.A   | Deamidated: 8                        |
|      |              |      |        | 91 - 107  | 1072.47 | 86.4  | R.SQQQEPLVCPN<br>YQSYFR.T                 | Carbamidomethyl:<br>9                |
|      |              |      |        | 91 - 107  | 1072.97 | 60.2  | R.SQQQEPLVCPN<br>YQSYFR.T                 | Carbamidomethyl:<br>9; Deamidated: 4 |
|      |              |      |        | 306 - 333 | 1089.21 | 71.6  | R.YSCQLNQVQSLI<br>VSVESQLAEIRSDL<br>ER.Q  | Carbamidomethyl:<br>3; Deamidated: 6 |
|      |              |      |        | 277 - 305 | 1099.23 | 38.1  | R.TVNALEVELQAA<br>HNL.RDSENTLTE<br>TEAR.Y | Deamidated: 12                       |
| K33b | gij999000003 | 45.9 | 7435.9 | 241 - 246 | 366.16  | 42.1  | R.VLNETR.A                                |                                      |
|      |              |      |        | 153 - 159 | 404.2   | 53.7  | K.LAADDFFR.T                              |                                      |
|      |              |      |        | 84 - 90   | 412.24  | 59    | R.LASYLEK.V                               |                                      |
|      |              |      |        | 24 - 30   | 423.76  | 45.2  | C.LPNLSFR.S                               |                                      |
|      |              |      |        | 136 - 143 | 437.21  | 39.6  | L.ANKAENAR.L                              |                                      |
|      |              |      |        | 220 - 227 | 451.77  | 30.7  | R.SQLGDRLN.V                              |                                      |
|      |              |      |        | 202 - 208 | 452.73  | 35.1  | K.EELICK.Q                                | Carbamidomethyl:<br>5                |
|      |              |      |        | 170 - 181 | 467.6   | 48.4  | R.QLVESDINGLRR<br>.I                      | Deamidated: 8                        |
|      |              |      |        | 97 - 104  | 474.21  | 51.3  | R.ENAELESR.I                              |                                      |
|      |              |      |        | 247 - 258 | 483.91  | 67.4  | R.AQYEALVETNR<br>R.D                      |                                      |
|      |              |      |        | 247 - 258 | 484.26  | 49    | R.AQYEALVETNR<br>R.D                      | Deamidated: 2                        |
|      |              |      |        | 97 - 108  | 486.94  | 40.3  | R.ENAELESRILER.<br>S                      |                                      |
|      |              |      |        | 162 - 169 | 490.76  | 56.6  | K.YQTELG.LR.Q                             | Deamidated: 2                        |
|      |              |      |        | 135 - 143 | 493.77  | 51.5  | I.LANKAENAR.L                             |                                      |
|      |              |      |        | 126 - 133 | 494.74  | 62.4  | R.TIEELQQK.I                              |                                      |
|      |              |      |        | 414 - 422 | 500.19  | 44.9  | R.FGPCNTSGC.-                             | Carbamidomethyl:<br>4, 9             |
|      |              |      |        | 144 - 152 | 500.33  | 72.4  | R.LVVQIDNAK.L                             |                                      |

|  |  |  |  |           |        |      |                          |                                       |
|--|--|--|--|-----------|--------|------|--------------------------|---------------------------------------|
|  |  |  |  | 144 - 152 | 500.83 | 65.2 | R.LVVQIDNAK.L            | Deamidated: 7                         |
|  |  |  |  | 356 - 363 | 503.35 | 38.9 | E.YQVLLDVR.A             |                                       |
|  |  |  |  | 23 - 30   | 503.8  | 37   | F.CLPNLSFR.S             | Carbamidomethyl: 1                    |
|  |  |  |  | 76 - 83   | 512.78 | 29.9 | E.TMQFLNDR.L             |                                       |
|  |  |  |  | 153 - 161 | 518.76 | 41.7 | K.LAADDFRTK.Y            |                                       |
|  |  |  |  | 76 - 83   | 520.79 | 47.5 | E.TMQFLNDR.L             | Oxidation: 2                          |
|  |  |  |  | 118 - 125 | 537.81 | 50.6 | C.PNYQSYFR.T             |                                       |
|  |  |  |  | 84 - 92   | 539.83 | 76.2 | R.LASYLEKVR.Q            |                                       |
|  |  |  |  | 412 - 421 | 541.69 | 49.4 | R.SRFGPCNTSG.C           | Carbamidomethyl: 6                    |
|  |  |  |  | 412 - 421 | 542.25 | 45   | R.SRFGPCNTSG.C           | Carbamidomethyl: 6; Deamidated: 7     |
|  |  |  |  | 134 - 143 | 550.27 | 66.3 | K.ILANKAENAR.L           |                                       |
|  |  |  |  | 134 - 143 | 550.82 | 66.4 | K.ILANKAENAR.L           | Deamidated: 4                         |
|  |  |  |  | 182 - 190 | 552.85 | 78.5 | R.ILDELTLCCK.S           | Carbamidomethyl: 8                    |
|  |  |  |  | 259 - 266 | 555.25 | 54.6 | R.DVEEWYIR.Q             |                                       |
|  |  |  |  | 366 - 374 | 562.76 | 65.1 | R.LESEINTYR.G            |                                       |
|  |  |  |  | 366 - 374 | 563.28 | 59.6 | R.LESEINTYR.G            | Deamidated: 6                         |
|  |  |  |  | 211 - 219 | 563.31 | 45.3 | N.HEQEVNTLR.S            |                                       |
|  |  |  |  | 211 - 219 | 563.79 | 37   | N.HEQEVNTLR.S            | Deamidated: 3                         |
|  |  |  |  | 220 - 229 | 565.83 | 75.5 | R.SQLGDRLNVE.V           |                                       |
|  |  |  |  | 125 - 133 | 572.81 | 46.6 | F.RTIEELQKQK.I           |                                       |
|  |  |  |  | 126 - 140 | 576.69 | 43.8 | R.TIEELQKQKILANK<br>AE.N |                                       |
|  |  |  |  | 91 - 104  | 577.27 | 32.6 | K.VRQLERENAELE<br>SR.I   | Deamidated: 3                         |
|  |  |  |  | 75 - 83   | 577.29 | 63.1 | K.ETMQFLNDR.L            |                                       |
|  |  |  |  | 22 - 30   | 577.34 | 55.1 | N.FCLPNLSFR.S            | Carbamidomethyl: 2                    |
|  |  |  |  | 75 - 83   | 577.79 | 43.9 | K.ETMQFLNDR.L            | Deamidated: 4                         |
|  |  |  |  | 352 - 365 | 577.99 | 52.9 | R.QNQEYQVLLDV<br>RAR.L   |                                       |
|  |  |  |  | 75 - 83   | 585.22 | 58.7 | K.ETMQFLNDR.L            | Oxidation: 3                          |
|  |  |  |  | 160 - 169 | 604.84 | 52   | R.TKYQTELGRLR.Q          |                                       |
|  |  |  |  | 160 - 169 | 605.32 | 68.6 | R.TKYQTELGRLR.Q          | Deamidated: 4                         |
|  |  |  |  | 191 - 201 | 609.87 | 97.6 | K.SDLEAQVESLK.<br>E      |                                       |
|  |  |  |  | 199 - 208 | 616.9  | 40.9 | E.SLKEELICLK.Q           | Carbamidomethyl: 8                    |
|  |  |  |  | 412 - 422 | 621.75 | 80   | R.SRFGPCNTSGC.<br>-      | Carbamidomethyl: 6, 11                |
|  |  |  |  | 412 - 422 | 622.27 | 83.7 | R.SRFGPCNTSGC.<br>-      | Carbamidomethyl: 6, 11; Deamidated: 7 |
|  |  |  |  | 181 - 190 | 630.91 | 40.3 | R.RILDELTLCCK.S          | Carbamidomethyl: 9                    |
|  |  |  |  | 258 - 266 | 633.28 | 53.4 | R.RDVEEWYIR.Q            |                                       |
|  |  |  |  | 21 - 30   | 634.36 | 38.7 | Y.NFCLPNLSFR.S           | Carbamidomethyl: 3                    |
|  |  |  |  | 21 - 30   | 634.85 | 38.4 | Y.NFCLPNLSFR.S           | Carbamidomethyl: 3; Deamidated: 1     |
|  |  |  |  | 64 - 74   | 644.8  | 56.8 | W.FCEGSFNGNEK<br>.E      | Carbamidomethyl: 2                    |
|  |  |  |  | 247 - 257 | 647.36 | 88.2 | R.AQYEALVETNR.<br>R      |                                       |
|  |  |  |  | 109 - 119 | 650.33 | 45.9 | R.SQQQEPLVCPN.<br>Y      | Carbamidomethyl: 9                    |
|  |  |  |  | 294 - 310 | 664.4  | 59.1 | R.RTVNALEVELQA           |                                       |

|  |  |  |  |           |        |       |                                         |                                      |
|--|--|--|--|-----------|--------|-------|-----------------------------------------|--------------------------------------|
|  |  |  |  |           |        |       | QHNL.R.D                                |                                      |
|  |  |  |  | 153 - 169 | 666.38 | 49.6  | K.LAADDFRTKYQT<br>ELGLR.Q               |                                      |
|  |  |  |  | 153 - 169 | 666.7  | 42    | K.LAADDFRTKYQT<br>ELGLR.Q               | Deamidated: 11                       |
|  |  |  |  | 241 - 257 | 669.35 | 64.4  | R.VLNETRAQYEAL<br>VETNR.R               |                                      |
|  |  |  |  | 144 - 161 | 673.05 | 61.3  | R.LVVQIDNAKLAA<br>DDFRTK.Y              |                                      |
|  |  |  |  | 364 - 374 | 676.37 | 92.5  | R.ARLESEINTYR.G<br>D.SLENTLTETEAR.<br>Y |                                      |
|  |  |  |  | 312 - 323 | 682.31 | 85.3  | K.QNHEQEVNTRLR.<br>S                    |                                      |
|  |  |  |  | 209 - 219 | 684.3  | 59.6  | K.QNHEQEVNTRLR.<br>S                    | Deamidated: 1, 2,<br>5               |
|  |  |  |  | 209 - 219 | 685.79 | 44.5  | R.TIEELQQKILANK<br>AENAR.L              |                                      |
|  |  |  |  | 126 - 143 | 690.4  | 52.2  | R.QLVESDINGLRR<br>.I                    |                                      |
|  |  |  |  | 170 - 181 | 700.36 | 44.8  | L.RQLVESDINGLR.<br>R                    | Deamidated: 9                        |
|  |  |  |  | 169 - 180 | 700.85 | 44    | R.SDLERQNQEYQ<br>VLLDVR.A               |                                      |
|  |  |  |  | 347 - 363 | 702.4  | 57.5  | N.EKETMQFLNDR.<br>L                     |                                      |
|  |  |  |  | 73 - 83   | 705.85 | 53.4  | S.YNFCLPNLSFR.<br>S                     | Carbamidomethyl:<br>4                |
|  |  |  |  | 20 - 30   | 715.85 | 53.5  | R.VLNETRAQYEAL<br>VETNRR.D              |                                      |
|  |  |  |  | 241 - 258 | 721.39 | 41.2  | T.RAQYEALVETNR<br>.R                    |                                      |
|  |  |  |  | 246 - 257 | 725.38 | 63.2  | R.AQYEALVETNR<br>R.D                    | Deamidated: 10                       |
|  |  |  |  | 247 - 258 | 725.86 | 35.9  | Q.VESLKEELICK.<br>Q                     | Carbamidomethyl:<br>10               |
|  |  |  |  | 197 - 208 | 730.94 | 73.1  | R.GLLDSEDTKLPC<br>N.P                   | Carbamidomethyl:<br>12               |
|  |  |  |  | 375 - 387 | 731.39 | 35    | R.QLERENAELES<br>R.I                    |                                      |
|  |  |  |  | 93 - 104  | 737.36 | 53.4  | R.QLERENAELES<br>R.I                    | Deamidated: 1                        |
|  |  |  |  | 93 - 104  | 737.8  | 57.7  | K.ETMQFLNDRLA<br>SYLEKVR.Q              |                                      |
|  |  |  |  | 75 - 92   | 738.4  | 85.8  | R.DSLENTLTETEA<br>R.Y                   |                                      |
|  |  |  |  | 311 - 323 | 739.86 | 110.7 | R.DSLENTLTETEA<br>R.Y                   | Deamidated: 5                        |
|  |  |  |  | 311 - 323 | 740.35 | 84.4  | K.ETMQFLNDRLA<br>SYLEKVR.Q              | Oxidation: 3                         |
|  |  |  |  | 75 - 92   | 743.73 | 32.9  | R.QNQEYQVLLDV<br>R.A                    |                                      |
|  |  |  |  | 352 - 363 | 752.95 | 94.4  | R.QNQEYQVLLDV<br>R.A                    | Deamidated: 3                        |
|  |  |  |  | 352 - 363 | 753.42 | 40.6  | M.SYNFCLPNLSFR<br>.S                    | Carbamidomethyl:<br>5                |
|  |  |  |  | 19 - 30   | 759.38 | 56.6  | M.SYNFCLPNLSFR<br>.S                    | Carbamidomethyl:<br>5; Deamidated: 3 |
|  |  |  |  | 19 - 30   | 759.92 | 29.3  | N.ALEVELQAQHNL<br>R.D                   |                                      |
|  |  |  |  | 298 - 310 | 760.93 | 66.3  | R.SQLGDRLNVEV<br>DAAPTVDLNR.V           | Deamidated: 2                        |
|  |  |  |  | 220 - 240 | 761.77 | 25.3  | R.TIEELQQKILANK<br>.A                   |                                      |
|  |  |  |  | 126 - 138 | 764.47 | 65.4  | R.LNVEVDAAPTVD                          |                                      |
|  |  |  |  | 226 - 246 | 780.07 | 46.8  |                                         |                                      |

|  |  |  |  |           |         |       |                                           |                                              |
|--|--|--|--|-----------|---------|-------|-------------------------------------------|----------------------------------------------|
|  |  |  |  |           |         |       | LNRVLNETR.A                               |                                              |
|  |  |  |  | 71 - 83   | 791.34  | 57.9  | N.GNEKETMQFLN<br>DR.L                     |                                              |
|  |  |  |  | 160 - 180 | 812.1   | 30.8  | R.TKYQTELGRLRQL<br>VESDINGLR.R            | Deamidated: 4                                |
|  |  |  |  | 226 - 240 | 813.43  | 102.5 | R.LNVEVDAAPTVD<br>LNR.V                   |                                              |
|  |  |  |  | 274 - 294 | 821.78  | 44.7  | K.QVVSSEQLQS<br>YQAEIILRR.T               |                                              |
|  |  |  |  | 232 - 246 | 834.92  | 43.4  | D.AAPTVDLNRVLN<br>ETR.A                   |                                              |
|  |  |  |  | 247 - 266 | 847.4   | 25.5  | R.AQYEALVETNR<br>RDVEEWYIR.Q              |                                              |
|  |  |  |  | 91 - 104  | 864.89  | 63.8  | K.VRQLERENAELE<br>SR.I                    |                                              |
|  |  |  |  | 105 - 125 | 885.73  | 69.3  | R.ILERSQQQEPLV<br>CPNYQSYFR.T             | Carbamidomethyl:<br>13                       |
|  |  |  |  | 144 - 159 | 894.46  | 114.4 | R.LVVQIDNAKLAA<br>DDFR.T                  |                                              |
|  |  |  |  | 76 - 90   | 914.97  | 89.7  | E.TMQFLNDRLAS<br>YLEK.V                   |                                              |
|  |  |  |  | 75 - 89   | 915.42  | 54.1  | K.ETMQFLNDRLA<br>SYLE.K                   |                                              |
|  |  |  |  | 295 - 310 | 917.99  | 119.9 | R.TVNALEVELQAQ<br>HNL.R.D                 |                                              |
|  |  |  |  | 295 - 310 | 918.46  | 65    | R.TVNALEVELQAQ<br>HNL.R.D                 | Deamidated: 3                                |
|  |  |  |  | 295 - 310 | 918.47  | 86.3  | R.TVNALEVELQAQ<br>HNL.R.D                 | Deamidated: 10                               |
|  |  |  |  | 197 - 219 | 937.11  | 62.1  | Q.VESLKEELICK<br>QNHEQEVNTRLR.S           | Carbamidomethyl:<br>10                       |
|  |  |  |  | 287 - 310 | 939.52  | 63    | Q.AEIIELRRTVNAL<br>EVELQAQHNL.R.D         | Deamidated: 11                               |
|  |  |  |  | 259 - 273 | 976.47  | 63.8  | R.DVEEWYIRQTE<br>ELNK.Q                   |                                              |
|  |  |  |  | 75 - 90   | 979.47  | 57.9  | K.ETMQFLNDRLA<br>SYLEK.V                  |                                              |
|  |  |  |  | 75 - 90   | 979.98  | 64.9  | K.ETMQFLNDRLA<br>SYLEK.V                  | Deamidated: 7                                |
|  |  |  |  | 75 - 90   | 987.46  | 36.8  | K.ETMQFLNDRLA<br>SYLEK.V                  | Oxidation: 3                                 |
|  |  |  |  | 182 - 198 | 988.5   | 46.1  | R.ILDELTICKSDLE<br>AQVE.S                 | Carbamidomethyl:<br>8                        |
|  |  |  |  | 220 - 246 | 998.85  | 36    | R.SQLGDRLNVEV<br>DAAPTVDLNRVLN<br>ETR.A   |                                              |
|  |  |  |  | 191 - 208 | 1052.61 | 104.4 | K.SDLEAQVESLKE<br>ELICK.Q                 | Carbamidomethyl:<br>16                       |
|  |  |  |  | 182 - 208 | 1064.23 | 28    | R.ILDELTICKSDLE<br>AQVESLKEELICK<br>.Q    | Carbamidomethyl:<br>8, 25;<br>Deamidated: 15 |
|  |  |  |  | 46 - 74   | 1067.79 | 46.2  | G.TTLPGACNIPAN<br>VGSCNWFCEGSF<br>NGNEK.E | Carbamidomethyl:<br>7, 16, 20                |
|  |  |  |  | 109 - 125 | 1072.47 | 86.4  | R.SQQQEPLVCPN<br>YQSYFR.T                 | Carbamidomethyl:<br>9                        |
|  |  |  |  | 109 - 125 | 1072.97 | 60.2  | R.SQQQEPLVCPN<br>YQSYFR.T                 | Carbamidomethyl:<br>9; Deamidated: 4         |
|  |  |  |  | 324 - 351 | 1089.21 | 94.2  | R.YSCQLSQVQSLI<br>VNVESQLAEIRSDL<br>ER.Q  | Carbamidomethyl:<br>3; Deamidated: 9         |
|  |  |  |  | 295 - 323 | 1099.23 | 38.1  | R.TVNALEVELQAQ<br>HNLRDSLENTLTE<br>TEAR.Y | Deamidated: 12                               |
|  |  |  |  | 220 - 240 | 1141.56 | 82.6  | R.SQLGDRLNVEV                             |                                              |

|     |              |      |        |           |         |      |                               |                        |
|-----|--------------|------|--------|-----------|---------|------|-------------------------------|------------------------|
|     |              |      |        |           |         |      | DAAPTVDLNR.V                  |                        |
|     |              |      |        | 220 - 240 | 1142.06 | 34   | R.SQLGDRLNVEV<br>DAAPTVDLNR.V | Deamidated: 20         |
| K35 | gij999000005 | 49.7 | 3086.8 | 264 - 269 | 381.23  | 46.1 | R.VLNEMR.C                    |                        |
|     |              |      |        | 176 - 182 | 404.2   | 53.7 | K.LAADDFR.T                   |                        |
|     |              |      |        | 107 - 113 | 412.24  | 59   | R.LASYLEK.V                   |                        |
|     |              |      |        | 225 - 231 | 452.73  | 35.1 | K.EELLCLK.K                   | Carbamidomethyl:<br>5  |
|     |              |      |        | 120 - 127 | 474.21  | 51.3 | R.ENAELESR.I                  |                        |
|     |              |      |        | 149 - 156 | 494.74  | 62.4 | Q.TIEELQKK.I                  |                        |
|     |              |      |        | 167 - 175 | 500.33  | 72.4 | R.LVVQIDNAK.L                 |                        |
|     |              |      |        | 167 - 175 | 500.83  | 65.2 | R.LVVQIDNAK.L                 | Deamidated: 7          |
|     |              |      |        | 379 - 386 | 503.35  | 38.9 | E.YQVLLDVR.A                  |                        |
|     |              |      |        | 99 - 106  | 512.78  | 29.9 | E.TMQFLNDR.L                  |                        |
|     |              |      |        | 176 - 184 | 518.76  | 41.7 | K.LAADDFRTK.Y                 |                        |
|     |              |      |        | 398 - 406 | 518.78  | 43.6 | R.GLLDSEDCK.L                 | Carbamidomethyl:<br>8  |
|     |              |      |        | 99 - 106  | 520.79  | 47.5 | E.TMQFLNDR.L                  | Oxidation: 2           |
|     |              |      |        | 107 - 115 | 539.83  | 76.2 | R.LASYLEKVR.Q                 |                        |
|     |              |      |        | 205 - 213 | 545.83  | 74.6 | R.ILDDTLCK.A                  | Carbamidomethyl:<br>8  |
|     |              |      |        | 47 - 57   | 556.82  | 37.9 | R.SFSACSVGLGK.<br>S           | Carbamidomethyl:<br>5  |
|     |              |      |        | 114 - 127 | 577.27  | 32.6 | K.VRQLERENAELE<br>SR.I        | Deamidated: 3          |
|     |              |      |        | 98 - 106  | 577.29  | 63.1 | K.ETMQFLNDR.L                 |                        |
|     |              |      |        | 98 - 106  | 577.79  | 43.9 | K.ETMQFLNDR.L                 | Deamidated: 4          |
|     |              |      |        | 375 - 388 | 577.99  | 52.9 | R.QNQEYQVLLDV<br>RAR.L        |                        |
|     |              |      |        | 7 - 26    | 583.96  | 68.8 | K.ASFSSGSLKVPG<br>GAGGGSAR.V  |                        |
|     |              |      |        | 98 - 106  | 585.22  | 58.7 | K.ETMQFLNDR.L                 | Oxidation: 3           |
|     |              |      |        | 389 - 397 | 585.73  | 59   | R.LECEISTYR.G                 | Carbamidomethyl:<br>3  |
|     |              |      |        | 27 - 37   | 601.79  | 66.6 | R.VSTIFSSSSCK.L               | Carbamidomethyl:<br>10 |
|     |              |      |        | 233 - 242 | 613.81  | 35.2 | K.NHEEEVNSLR.C                |                        |
|     |              |      |        | 222 - 231 | 616.9   | 40.9 | E.SLKEELLCLK.K                | Carbamidomethyl:<br>8  |
|     |              |      |        | 167 - 184 | 673.05  | 61.3 | R.LVVQIDNAKLAA<br>DDFRTK.Y    |                        |
|     |              |      |        | 387 - 397 | 699.36  | 38.5 | R.ARLECEISTYR.G               | Carbamidomethyl:<br>5  |
|     |              |      |        | 334 - 346 | 703.37  | 99.8 | R.DALESTLAETEA<br>R.Y         |                        |
|     |              |      |        | 96 - 106  | 705.85  | 53.4 | N.EKETMQFLNDR.<br>L           |                        |
|     |              |      |        | 193 - 204 | 709.35  | 30.7 | R.QLVESDMNGLR<br>R.I          |                        |
|     |              |      |        | 220 - 231 | 730.94  | 73.1 | Q.VESLKEELLCLK.<br>K          | Carbamidomethyl:<br>10 |
|     |              |      |        | 116 - 127 | 737.36  | 53.4 | R.QLERENAELES<br>R.I          |                        |
|     |              |      |        | 116 - 127 | 737.8   | 57.7 | R.QLERENAELES<br>R.I          | Deamidated: 1          |
|     |              |      |        | 98 - 115  | 738.4   | 85.8 | K.ETMQFLNDRLA<br>SYLEKVR.Q    |                        |
|     |              |      |        | 214 - 232 | 739.44  | 32.1 | K.ADLEAQVESLKE<br>ELLCLKK.N   | Carbamidomethyl:<br>16 |
|     |              |      |        | 98 - 115  | 743.73  | 32.9 | K.ETMQFLNDRLA<br>SYLEKVR.Q    | Oxidation: 3           |

|     |              |      |        |           |        |       |                             |                       |
|-----|--------------|------|--------|-----------|--------|-------|-----------------------------|-----------------------|
|     |              |      |        | 375 - 386 | 752.95 | 94.4  | R.QNQEQVLLDV<br>R.A         |                       |
|     |              |      |        | 375 - 386 | 753.42 | 40.6  | R.QNQEQVLLDV<br>R.A         | Deamidated: 3         |
|     |              |      |        | 162 - 175 | 778.89 | 64.5  | K.SENARLVVQIDN<br>AK.L      |                       |
|     |              |      |        | 94 - 106  | 791.34 | 57.9  | T.GNEKETMQFLN<br>DR.L       |                       |
|     |              |      |        | 297 - 317 | 821.78 | 44.7  | Q.QVVSSEQLQS<br>YQAEIILRR.T |                       |
|     |              |      |        | 114 - 127 | 864.89 | 63.8  | K.VRQLERENAELE<br>SR.I      |                       |
|     |              |      |        | 167 - 182 | 894.46 | 114.4 | R.LVVQIDNAKLAA<br>DDFR.T    |                       |
|     |              |      |        | 99 - 113  | 914.97 | 89.7  | E.TMQFLNDRLAS<br>YLEK.V     |                       |
|     |              |      |        | 98 - 112  | 915.42 | 54.1  | K.ETMQFLNDRLA<br>SYLE.K     |                       |
|     |              |      |        | 318 - 333 | 920.5  | 60    | R.TVNALEIELQAQ<br>HSMR.D    |                       |
|     |              |      |        | 318 - 333 | 928.46 | 65    | R.TVNALEIELQAQ<br>HSMR.D    | Oxidation: 15         |
|     |              |      |        | 98 - 113  | 979.47 | 57.9  | K.ETMQFLNDRLA<br>SYLEK.V    |                       |
|     |              |      |        | 98 - 113  | 979.98 | 64.9  | K.ETMQFLNDRLA<br>SYLEK.V    | Deamidated: 7         |
|     |              |      |        | 98 - 113  | 987.46 | 36.8  | K.ETMQFLNDRLA<br>SYLEK.V    | Oxidation: 3          |
| K38 | gij999000006 | 49.8 | 1117.2 | 183 - 189 | 404.2  | 53.7  | K.LAADDFR.I                 |                       |
|     |              |      |        | 114 - 120 | 412.24 | 59    | R.LASYLEK.V                 |                       |
|     |              |      |        | 106 - 113 | 512.78 | 29.9  | E.TMQFLNDR.L                |                       |
|     |              |      |        | 106 - 113 | 520.79 | 47.5  | E.TMQFLNDR.L                | Oxidation: 2          |
|     |              |      |        | 114 - 122 | 539.83 | 76.2  | R.LASYLEKVR.G               |                       |
|     |              |      |        | 105 - 113 | 577.29 | 63.1  | K.ETMQFLNDR.L               |                       |
|     |              |      |        | 105 - 113 | 577.79 | 43.9  | K.ETMQFLNDR.L               | Deamidated: 4         |
|     |              |      |        | 105 - 113 | 585.22 | 58.7  | K.ETMQFLNDR.L               | Oxidation: 3          |
|     |              |      |        | 9 - 20    | 635.73 | 44.8  | R.HSLGCTNTPGA<br>R.N        | Carbamidomethyl:<br>5 |
|     |              |      |        | 103 - 113 | 705.85 | 53.4  | H.EKETMQFLNDR.<br>L         |                       |
|     |              |      |        | 105 - 122 | 738.4  | 85.8  | K.ETMQFLNDRLA<br>SYLEKVR.G  |                       |
|     |              |      |        | 105 - 122 | 743.73 | 32.9  | K.ETMQFLNDRLA<br>SYLEKVR.G  | Oxidation: 3          |
|     |              |      |        | 382 - 395 | 852.44 | 56.5  | R.QNQEQVLLDV<br>KAR.L       |                       |
|     |              |      |        | 106 - 120 | 914.97 | 89.7  | E.TMQFLNDRLAS<br>YLEK.V     |                       |
|     |              |      |        | 105 - 119 | 915.42 | 54.1  | K.ETMQFLNDRLA<br>SYLE.K     |                       |
|     |              |      |        | 105 - 120 | 979.47 | 57.9  | K.ETMQFLNDRLA<br>SYLEK.V    |                       |
|     |              |      |        | 105 - 120 | 979.98 | 64.9  | K.ETMQFLNDRLA<br>SYLEK.V    | Deamidated: 7         |
|     |              |      |        | 105 - 120 | 987.46 | 36.8  | K.ETMQFLNDRLA<br>SYLEK.V    | Oxidation: 3          |
| K81 | gij999000007 |      | 7251.8 | 33 - 38   | 378.17 | 30.9  | R.GISCYR.G                  | Carbamidomethyl:<br>4 |
|     |              |      |        | 193 - 201 | 388.88 | 59    | R.RYEEVALR.A                |                       |
|     |              |      |        | 1 - 7     | 392.61 | 33.1  | -.TCGSGFR.G                 | Carbamidomethyl:<br>2 |
|     |              |      |        | 116 - 122 | 406.2  | 52.8  | R.FAAFIDK.V                 |                       |
|     |              |      |        | 39 - 47   | 426.21 | 57.8  | R.GLTGGFGSR.S               |                       |

|  |  |  |  |           |        |      |                         |                                      |
|--|--|--|--|-----------|--------|------|-------------------------|--------------------------------------|
|  |  |  |  | 125 - 131 | 453.75 | 35.3 | R.FLEQQNK.L             |                                      |
|  |  |  |  | 397 - 408 | 473.93 | 60.9 | K.LGLDIEIATYRR.L        |                                      |
|  |  |  |  | 242 - 248 | 476.25 | 53.8 | R.LYEEEEIR.V            |                                      |
|  |  |  |  | 137 - 143 | 484.78 | 49.4 | K.LQFYQNR.Q             |                                      |
|  |  |  |  | 137 - 143 | 485.29 | 39.8 | K.LQFYQNR.Q             | Deamidated: 6                        |
|  |  |  |  | 409 - 416 | 487.22 | 73.6 | R.LLEGQEQR.L            | Deamidated: 5                        |
|  |  |  |  | 332 - 340 | 487.78 | 54.2 | R.LTAEVENAK.C           |                                      |
|  |  |  |  | 111 - 122 | 490.26 | 48.4 | K.CLNNRFAAFIDK.<br>V    | Carbamidomethyl:<br>1                |
|  |  |  |  | 289 - 300 | 490.58 | 47.6 | R.SRAEAESWYRS<br>K.C    |                                      |
|  |  |  |  | 328 - 340 | 490.94 | 57.7 | R.VIQRLTAEVENA<br>K.C   |                                      |
|  |  |  |  | 38 - 47   | 504.24 | 30.1 | Y.RGLTGGFGSR.S          |                                      |
|  |  |  |  | 194 - 201 | 504.78 | 64.6 | R.YEEEVALR.A            |                                      |
|  |  |  |  | 320 - 331 | 504.93 | 31.9 | K.EEINELNRVIQR.<br>L    |                                      |
|  |  |  |  | 291 - 298 | 506.22 | 60.9 | R.AEAESWYR.S            |                                      |
|  |  |  |  | 214 - 221 | 506.24 | 47.7 | K.DVDCAYLR.K            | Carbamidomethyl:<br>4                |
|  |  |  |  | 10 - 23   | 507.88 | 42.1 | R.AFSCVSACGPR<br>PGR.C  | Carbamidomethyl:<br>4, 8             |
|  |  |  |  | 320 - 327 | 508.75 | 40.7 | K.EEINELNR.V            |                                      |
|  |  |  |  | 280 - 288 | 519.76 | 75   | K.AQYDDIASR.S           |                                      |
|  |  |  |  | 280 - 288 | 520.26 | 25.9 | K.AQYDDIASR.S           | Deamidated: 2                        |
|  |  |  |  | 33 - 47   | 529.94 | 37.5 | R.GISCYRGLTGGF<br>GSR.S | Carbamidomethyl:<br>4                |
|  |  |  |  | 116 - 124 | 533.78 | 70   | R.FAAFIDKVR.F           |                                      |
|  |  |  |  | 368 - 377 | 536.29 | 87.2 | K.LAGLEELQK.A           |                                      |
|  |  |  |  | 409 - 417 | 543.8  | 53.2 | R.LLEGQEQL.C            | Deamidated: 5                        |
|  |  |  |  | 241 - 248 | 554.32 | 49.9 | R.RLYEEEEIR.V           |                                      |
|  |  |  |  | 24 - 32   | 556.29 | 67.9 | R.CCITAAPYR.G           | Carbamidomethyl:<br>1, 2             |
|  |  |  |  | 388 - 396 | 564.25 | 51.7 | K.EYQEVMSK.L            |                                      |
|  |  |  |  | 408 - 416 | 565.27 | 54.6 | R.RLLEGQEQR.L           | Deamidated: 6                        |
|  |  |  |  | 214 - 222 | 570.28 | 47.7 | K.DVDCAYLRK.S           | Carbamidomethyl:<br>4                |
|  |  |  |  | 213 - 221 | 570.31 | 68.3 | K.KDVDCAYLR.K           | Carbamidomethyl:<br>5                |
|  |  |  |  | 111 - 124 | 575.66 | 44.3 | K.CLNNRFAAFIDK<br>VR.F  | Carbamidomethyl:<br>1; Deamidated: 3 |
|  |  |  |  | 318 - 331 | 581.36 | 57.6 | R.TKEEINELNRVIQ<br>R.L  |                                      |
|  |  |  |  | 318 - 331 | 581.67 | 50   | R.TKEEINELNRVIQ<br>R.L  | Deamidated: 6                        |
|  |  |  |  | 123 - 136 | 582.65 | 27.6 | K.VRFLEQQNKLL<br>TK.L   |                                      |
|  |  |  |  | 378 - 387 | 589.31 | 71.3 | K.AKQDMACLLK.E          | Carbamidomethyl:<br>7                |
|  |  |  |  | 202 - 212 | 596.83 | 83.1 | R.ATAENEFVALK.<br>K     |                                      |
|  |  |  |  | 164 - 174 | 597.72 | 89.2 | R.EAECADSGR.<br>L       | Carbamidomethyl:<br>4                |
|  |  |  |  | 367 - 377 | 600.38 | 84.8 | R.KLAGLEELQK.<br>A      |                                      |
|  |  |  |  | 263 - 272 | 605.76 | 41.2 | K.MDNSRDLNMD.<br>N      |                                      |
|  |  |  |  | 10 - 20   | 606.22 | 73.9 | R.AFSCVSACGPR.<br>P     | Carbamidomethyl:<br>4, 8             |
|  |  |  |  | 301 - 310 | 609.86 | 73.6 | K.CEEIKATVIR.H          | Carbamidomethyl:<br>1                |

|  |  |  |  |           |        |       |                               |                                       |
|--|--|--|--|-----------|--------|-------|-------------------------------|---------------------------------------|
|  |  |  |  | 96 - 110  | 610.3  | 58.1  | D.PNAQCVKQEEK<br>EQIK.C       | Carbamidomethyl:<br>5                 |
|  |  |  |  | 332 - 347 | 612.01 | 40.4  | R.LTAEVENAKCQ<br>NSKLE.A      | Carbamidomethyl:<br>10                |
|  |  |  |  | 291 - 300 | 613.77 | 54.7  | R.AEAESWYRSK.C                |                                       |
|  |  |  |  | 24 - 38   | 616.6  | 35    | R.CCITAAPYRGIS<br>CYR.G       | Carbamidomethyl:<br>1, 2, 13          |
|  |  |  |  | 408 - 417 | 621.87 | 37.2  | R.RLLEGQEQL.C                 | Deamidated: 6                         |
|  |  |  |  | 318 - 327 | 623.33 | 85.6  | R.TKEEINELNR.V                |                                       |
|  |  |  |  | 289 - 298 | 627.84 | 69.5  | R.SRAEAESWYR.S                |                                       |
|  |  |  |  | 269 - 279 | 630.41 | 98    | D.LNMDNIVAEIK.A               |                                       |
|  |  |  |  | 397 - 407 | 632.39 | 96.6  | K.LGLDIEIATYR.R               |                                       |
|  |  |  |  | 23 - 32   | 634.25 | 35.1  | G.RCCITAAPYR.G                | Carbamidomethyl:<br>2, 3              |
|  |  |  |  | 368 - 379 | 635.89 | 76.4  | K.LAGLEEALQKAK<br>.Q          |                                       |
|  |  |  |  | 280 - 290 | 641.34 | 39.8  | K.AQYDDIASRSR.<br>A           |                                       |
|  |  |  |  | 92 - 102  | 643.84 | 65    | N.LEIDPNAQCVK.<br>Q           | Carbamidomethyl:<br>9                 |
|  |  |  |  | 263 - 279 | 660.35 | 40.9  | K.MDNSRDLNMDN<br>IVAEIK.A     | Deamidated: 3                         |
|  |  |  |  | 202 - 213 | 660.82 | 87.3  | R.ATAENEFVALKK<br>.D          |                                       |
|  |  |  |  | 263 - 279 | 665.31 | 51.1  | K.MDNSRDLNMDN<br>IVAEIK.A     | Oxidation: 9                          |
|  |  |  |  | 48 - 60   | 685.77 | 33.5  | R.SVCGGFRAGSC<br>GR.S         | Carbamidomethyl:<br>3, 11             |
|  |  |  |  | 268 - 279 | 687.88 | 92    | R.DLNMDNIVAEIK.<br>A          |                                       |
|  |  |  |  | 268 - 279 | 695.88 | 77.7  | R.DLNMDNIVAEIK.<br>A          | Oxidation: 4                          |
|  |  |  |  | 380 - 396 | 696.37 | 30.4  | K.QDMACLLKEYQ<br>EVMNSK.L     | Carbamidomethyl:<br>5                 |
|  |  |  |  | 268 - 279 | 696.88 | 37.9  | R.DLNMDNIVAEIK.<br>A          | Oxidation: 4;<br>Deamidated: 3, 6     |
|  |  |  |  | 174 - 191 | 698.4  | 43.3  | G.RLSSELNSLQEV<br>LEGYKK.R    |                                       |
|  |  |  |  | 175 - 192 | 698.41 | 30.3  | R.LSSELNSLQEVL<br>EGYKKR.R    |                                       |
|  |  |  |  | 317 - 327 | 701.36 | 63.2  | R.RTKEEINELNR.V               |                                       |
|  |  |  |  | 433 - 446 | 711.78 | 101.9 | R.GGVVCGDLCVS<br>GSR.P        | Carbamidomethyl:<br>5, 9              |
|  |  |  |  | 299 - 310 | 717.35 | 80.3  | R.SKCEEIKATVIR.<br>H          | Carbamidomethyl:<br>3                 |
|  |  |  |  | 346 - 366 | 724.38 | 30.1  | K.LEAAVTQAEQQ<br>GEAALADAKR.K | Deamidated: 7                         |
|  |  |  |  | 125 - 136 | 745.9  | 62.8  | R.FLEQQNKLLET<br>.L           |                                       |
|  |  |  |  | 125 - 136 | 746.4  | 57.5  | R.FLEQQNKLLET<br>.L           | Deamidated: 6                         |
|  |  |  |  | 368 - 387 | 749.43 | 37.7  | K.LAGLEEALQKAK<br>QDMACLK.E   | Carbamidomethyl:<br>17; Oxidation: 15 |
|  |  |  |  | 249 - 262 | 755.5  | 79.2  | R.VLQAHISDTSVIV<br>K.M        |                                       |
|  |  |  |  | 378 - 396 | 762.68 | 55.4  | K.AKQDMACLLKE<br>YQEVMSK.L    | Carbamidomethyl:<br>7                 |
|  |  |  |  | 34 - 47   | 765.81 | 40.4  | G.ISCYRGLTGGFG<br>SR.S        | Carbamidomethyl:<br>3                 |
|  |  |  |  | 378 - 396 | 768.04 | 42.5  | K.AKQDMACLLKE<br>YQEVMSK.L    | Carbamidomethyl:<br>7; Oxidation: 16  |
|  |  |  |  | 194 - 213 | 770.74 | 82.2  | R.YEEEVALRATAE<br>NEFVALKK.D  |                                       |

|  |  |  |  |           |         |       |                                                 |                                                  |
|--|--|--|--|-----------|---------|-------|-------------------------------------------------|--------------------------------------------------|
|  |  |  |  | 378 - 396 | 773.37  | 34.6  | K.AKQDMAELLKE<br>YQEVMSK.L                      | Carbamidomethyl:<br>7; Oxidation: 5, 16          |
|  |  |  |  | 132 - 143 | 776.94  | 80.9  | K.LLETKLQFYQNR<br>.Q                            |                                                  |
|  |  |  |  | 222 - 241 | 783.12  | 70.8  | R.KSDLEANVEALI<br>QETDFLRR.L                    |                                                  |
|  |  |  |  | 332 - 345 | 796.4   | 89    | R.LTAEVENAKCQ<br>NSK.L                          | Carbamidomethyl:<br>10                           |
|  |  |  |  | 332 - 345 | 796.84  | 46.1  | R.LTAEVENAKCQ<br>NSK.L                          | Carbamidomethyl:<br>10; Deamidated: 7            |
|  |  |  |  | 268 - 288 | 798.77  | 83    | R.DLNMDNIVAEIK<br>AQYDDIASR.S                   |                                                  |
|  |  |  |  | 268 - 288 | 804.09  | 64    | R.DLNMDNIVAEIK<br>AQYDDIASR.S                   | Oxidation: 4                                     |
|  |  |  |  | 125 - 143 | 814.09  | 71    | R.FLEQQNKLLET<br>LQFYQNR.Q                      |                                                  |
|  |  |  |  | 242 - 262 | 814.79  | 54.3  | R.LYEEEIRVLQAH<br>SDTSVIVK.M                    |                                                  |
|  |  |  |  | 144 - 163 | 824.77  | 39.8  | R.QCCESNLEPLFS<br>GYIETLR.R                     | Carbamidomethyl:<br>2, 3                         |
|  |  |  |  | 417 - 432 | 855.39  | 122   | R.LCEGVGSVNV<br>VSSSR.G                         | Carbamidomethyl:<br>2, 11                        |
|  |  |  |  | 341 - 365 | 877.74  | 72.1  | K.CQNSKLEAAVT<br>QAEQQGEAALAD<br>AK.R           | Carbamidomethyl:<br>1                            |
|  |  |  |  | 268 - 290 | 880.12  | 41    | R.DLNMDNIVAEIK<br>AQYDDIASRSR.A                 | Deamidated: 6                                    |
|  |  |  |  | 409 - 432 | 889.06  | 39.4  | R.LLEGQEQLCE<br>GVGSVNVCVSS<br>R.G              | Carbamidomethyl:<br>10, 19;<br>Deamidated: 5, 17 |
|  |  |  |  | 175 - 190 | 904.97  | 119.6 | R.LSSELNSLQEV<br>EGYK.K                         |                                                  |
|  |  |  |  | 175 - 190 | 905.49  | 89    | R.LSSELNSLQEV<br>EGYK.K                         | Deamidated: 6                                    |
|  |  |  |  | 175 - 190 | 905.95  | 36    | R.LSSELNSLQEV<br>EGYK.K                         | Deamidated: 6, 9                                 |
|  |  |  |  | 66 - 84   | 915.95  | 64.9  | R.SGGVGGGLSP<br>PCITTVSVNE.S                    | Carbamidomethyl:<br>11                           |
|  |  |  |  | 341 - 366 | 929.8   | 98.1  | K.CQNSKLEAAVT<br>QAEQQGEAALAD<br>AKR.K          | Carbamidomethyl:<br>1                            |
|  |  |  |  | 175 - 191 | 968.98  | 75.6  | R.LSSELNSLQEV<br>EGYK.R                         |                                                  |
|  |  |  |  | 175 - 191 | 969.53  | 40.3  | R.LSSELNSLQEV<br>EGYK.R                         | Deamidated: 6                                    |
|  |  |  |  | 263 - 279 | 989.45  | 103.2 | K.MDNSRDLNMD<br>NIVAEIK.A                       |                                                  |
|  |  |  |  | 164 - 190 | 995.45  | 47.7  | R.EAECAEADSG<br>R.LSSELNSLQEV<br>LEGYK.K        | Carbamidomethyl:<br>4                            |
|  |  |  |  | 346 - 365 | 1007.52 | 138.6 | K.LEAAVTQAEQQ<br>GEAALADAK.R                    |                                                  |
|  |  |  |  | 85 - 102  | 1013.02 | 82.8  | E.SLLTPLNLEID<br>PNAQCVK.Q                      | Carbamidomethyl:<br>16                           |
|  |  |  |  | 223 - 240 | 1032.05 | 125.8 | K.SDLEANVEALI<br>QETDFLR.R                      |                                                  |
|  |  |  |  | 222 - 240 | 1096.03 | 175.5 | R.KSDLEANVEALI<br>QETDFLR.R                     |                                                  |
|  |  |  |  | 66 - 99   | 1150.89 | 50.1  | R.SGGVGGGLSP<br>PCITTVSVNESLL<br>TPLNLEIDPNAQ.C | Carbamidomethyl:<br>11; Deamidated:<br>26        |
|  |  |  |  | 144 - 162 | 1158.61 | 94.5  | R.QCCESNLEPLFS<br>GYIETLR.R                     | Carbamidomethyl:<br>2, 3                         |
|  |  |  |  | 268 - 288 | 1198.01 | 57.8  | R.DLNMDNIVAEIK<br>AQYDDIASR.S                   | Deamidated: 3                                    |

|     |              |      |        |           |        |      |                        |                                      |
|-----|--------------|------|--------|-----------|--------|------|------------------------|--------------------------------------|
| K86 | gij999000010 | 54.8 | 7220.6 | 40 - 45   | 371.13 | 27.2 | R.GVSCYR.G             | Carbamidomethyl:<br>4                |
|     |              |      |        | 209 - 217 | 388.88 | 59   | K.RYEEVALR.A           |                                      |
|     |              |      |        | 133 - 139 | 406.2  | 52.8 | R.FAAFIDK.V            |                                      |
|     |              |      |        | 492 - 500 | 445.73 | 98.3 | R.VGGSILGCK.K          | Carbamidomethyl:<br>8                |
|     |              |      |        | 142 - 148 | 453.75 | 35.3 | R.FLEQQNK.L            |                                      |
|     |              |      |        | 413 - 424 | 473.93 | 60.9 | K.LGLDIEIATYRR.L       |                                      |
|     |              |      |        | 258 - 264 | 476.25 | 53.8 | R.LYEEIR.V             |                                      |
|     |              |      |        | 154 - 160 | 484.78 | 49.4 | K.LQFYQNR.Q            |                                      |
|     |              |      |        | 154 - 160 | 485.29 | 39.8 | K.LQFYQNR.Q            | Deamidated: 6                        |
|     |              |      |        | 425 - 432 | 487.22 | 73.6 | R.LLEGEEQR.L           |                                      |
|     |              |      |        | 348 - 356 | 487.78 | 54.2 | R.LTAEVENAK.C          |                                      |
|     |              |      |        | 128 - 139 | 490.26 | 48.4 | K.CLNNRFAAFIDK.<br>V   | Carbamidomethyl:<br>1                |
|     |              |      |        | 7 - 15    | 490.27 | 49.6 | R.ISPGYSVTR.T          |                                      |
|     |              |      |        | 305 - 316 | 490.58 | 47.6 | R.SRAEESWYRS<br>K.C    |                                      |
|     |              |      |        | 344 - 356 | 490.94 | 57.7 | R.VIQRLTAEVENA<br>K.C  |                                      |
|     |              |      |        | 210 - 217 | 504.78 | 64.6 | R.YEEVALR.A            |                                      |
|     |              |      |        | 336 - 347 | 504.93 | 31.9 | K.EEINELNRVIQR.<br>L   |                                      |
|     |              |      |        | 307 - 314 | 506.22 | 60.9 | R.AEAESWYR.S           |                                      |
|     |              |      |        | 230 - 237 | 506.24 | 47.7 | K.DVDCAYLR.K           | Carbamidomethyl:<br>4                |
|     |              |      |        | 336 - 343 | 508.75 | 40.7 | K.EEINELNR.V           |                                      |
|     |              |      |        | 492 - 501 | 509.76 | 44.8 | R.VGGSILGCKK.C         | Carbamidomethyl:<br>8                |
|     |              |      |        | 296 - 304 | 524.25 | 73.7 | K.AHYDDIASR.S          |                                      |
|     |              |      |        | 133 - 141 | 533.78 | 70   | R.FAAFIDKVR.F          |                                      |
|     |              |      |        | 384 - 393 | 536.29 | 87.2 | K.LAGLEEALQK.A         |                                      |
|     |              |      |        | 425 - 433 | 543.8  | 53.2 | R.LLEGEEQRL.C          |                                      |
|     |              |      |        | 54 - 64   | 545.8  | 80.4 | R.SVSALGSCGPR.<br>I    | Carbamidomethyl:<br>8                |
|     |              |      |        | 31 - 39   | 549.27 | 53.7 | R.CCISAAPYR.G          | Carbamidomethyl:<br>1, 2             |
|     |              |      |        | 257 - 264 | 554.32 | 49.9 | R.RLYEEIR.V            |                                      |
|     |              |      |        | 404 - 412 | 564.25 | 51.7 | K.EYQEVMSK.L           |                                      |
|     |              |      |        | 424 - 432 | 565.27 | 54.6 | R.RLLEGEEQR.L          |                                      |
|     |              |      |        | 6 - 15    | 568.31 | 45.9 | Y.RISPGYSVTR.T         |                                      |
|     |              |      |        | 230 - 238 | 570.28 | 47.7 | K.DVDCAYLRK.S          | Carbamidomethyl:<br>4                |
|     |              |      |        | 229 - 237 | 570.31 | 68.3 | K.KDVDCAYLR.K          | Carbamidomethyl:<br>5                |
|     |              |      |        | 128 - 141 | 575.66 | 44.3 | K.CLNNRFAAFIDK<br>VR.F | Carbamidomethyl:<br>1; Deamidated: 3 |
|     |              |      |        | 16 - 26   | 577.75 | 73.3 | R.TFSSCSAVAPK.<br>T    | Carbamidomethyl:<br>5                |
|     |              |      |        | 334 - 347 | 581.36 | 57.6 | R.TKEEINELNRVIQ<br>R.L |                                      |
|     |              |      |        | 334 - 347 | 581.67 | 50   | R.TKEEINELNRVIQ<br>R.L | Deamidated: 6                        |
|     |              |      |        | 140 - 153 | 582.65 | 27.6 | K.VRFLEQQNKLL<br>TK.L  |                                      |
|     |              |      |        | 394 - 403 | 589.31 | 71.3 | K.AKQDMACLLK.E         | Carbamidomethyl:<br>7                |
|     |              |      |        | 218 - 228 | 596.83 | 83.1 | R.ATAENEFVALK.<br>K    |                                      |
|     |              |      |        | 181 - 191 | 597.72 | 89.2 | R.EAECADSGR.           | Carbamidomethyl:                     |

|  |  |  |  |           |        |      |                               |                                       |
|--|--|--|--|-----------|--------|------|-------------------------------|---------------------------------------|
|  |  |  |  |           |        |      | L                             | 4                                     |
|  |  |  |  | 383 - 393 | 600.38 | 84.8 | C.KLAGLEEALQK.<br>A           |                                       |
|  |  |  |  | 279 - 288 | 605.76 | 41.2 | K.MDNSRDLNMD.<br>N            |                                       |
|  |  |  |  | 317 - 326 | 609.86 | 73.6 | K.CEEIKATVIR.H                | Carbamidomethyl:<br>1                 |
|  |  |  |  | 113 - 127 | 610.3  | 58.1 | D.PNAQCVKQEEK<br>EQIK.C       | Carbamidomethyl:<br>5                 |
|  |  |  |  | 348 - 363 | 612.01 | 40.4 | R.LTAEVENAKCQ<br>NSKLE.A      | Carbamidomethyl:<br>10                |
|  |  |  |  | 307 - 316 | 613.77 | 54.7 | R.AEAESWYRSK.C                |                                       |
|  |  |  |  | 424 - 433 | 621.87 | 37.2 | R.RLLEGEEQRL.C                |                                       |
|  |  |  |  | 334 - 343 | 623.33 | 85.6 | R.TKEEINELNR.V                |                                       |
|  |  |  |  | 305 - 314 | 627.84 | 69.5 | R.SRAEAESWYR.S                |                                       |
|  |  |  |  | 285 - 295 | 630.41 | 98   | D.LNMDNIVAEIK.A               |                                       |
|  |  |  |  | 413 - 423 | 632.39 | 96.6 | K.LGLDIEIATYR.R               |                                       |
|  |  |  |  | 384 - 395 | 635.89 | 76.4 | K.LAGLEEALQKAK<br>.Q          |                                       |
|  |  |  |  | 109 - 119 | 643.84 | 65   | N.LEIDPNAQCVK.<br>Q           | Carbamidomethyl:<br>9                 |
|  |  |  |  | 208 - 217 | 646.83 | 50   | K.KRYEEVALR.A                 |                                       |
|  |  |  |  | 279 - 295 | 660.35 | 40.9 | K.MDNSRDLNMDN<br>IVAEIK.A     | Deamidated: 3                         |
|  |  |  |  | 218 - 229 | 660.82 | 87.3 | R.ATAENEFVALKK<br>.D          |                                       |
|  |  |  |  | 279 - 295 | 665.31 | 51.1 | K.MDNSRDLNMDN<br>IVAEIK.A     | Oxidation: 9                          |
|  |  |  |  | 382 - 393 | 680.42 | 93.2 | K.CKLAGLEEALQK<br>.A          | Carbamidomethyl:<br>1                 |
|  |  |  |  | 284 - 295 | 687.88 | 92   | R.DLNMDNIVAEIK.<br>A          |                                       |
|  |  |  |  | 4 - 15    | 693.3  | 79.2 | R.SYRISPGYSVTR<br>.T          |                                       |
|  |  |  |  | 284 - 295 | 695.88 | 77.7 | R.DLNMDNIVAEIK.<br>A          | Oxidation: 4                          |
|  |  |  |  | 396 - 412 | 696.37 | 30.4 | K.QDMACLLKEYQ<br>EVMNSK.L     | Carbamidomethyl:<br>5                 |
|  |  |  |  | 284 - 295 | 696.88 | 37.9 | R.DLNMDNIVAEIK.<br>A          | Oxidation: 4;<br>Deamidated: 3, 6     |
|  |  |  |  | 191 - 208 | 698.4  | 43.3 | G.RLSSELNSLQEV<br>LEGYKK.R    |                                       |
|  |  |  |  | 192 - 209 | 698.41 | 30.3 | R.LSSELNSLQEV<br>EGYKKR.Y     |                                       |
|  |  |  |  | 333 - 343 | 701.36 | 63.2 | R.RTKEEINELNR.V               |                                       |
|  |  |  |  | 315 - 326 | 717.35 | 80.3 | R.SKCEEIKATVIR.<br>H          | Carbamidomethyl:<br>3                 |
|  |  |  |  | 142 - 153 | 745.9  | 62.8 | R.FLEQQNKLLET<br>.L           |                                       |
|  |  |  |  | 142 - 153 | 746.4  | 57.5 | R.FLEQQNKLLET<br>.L           | Deamidated: 6                         |
|  |  |  |  | 384 - 403 | 749.43 | 37.7 | K.LAGLEEALQKAK<br>QDMACLLK.E  | Carbamidomethyl:<br>17; Oxidation: 15 |
|  |  |  |  | 265 - 278 | 755.5  | 79.2 | R.VLQAHISDTSVIV<br>K.M        |                                       |
|  |  |  |  | 296 - 314 | 761.65 | 38   | K.AHYDDIASRSRA<br>EAESWYR.S   |                                       |
|  |  |  |  | 394 - 412 | 762.68 | 55.4 | K.AKQDMACLLKE<br>YQEVMSK.L    | Carbamidomethyl:<br>7                 |
|  |  |  |  | 394 - 412 | 768.04 | 42.5 | K.AKQDMACLLKE<br>YQEVMSK.L    | Carbamidomethyl:<br>7; Oxidation: 16  |
|  |  |  |  | 210 - 229 | 770.74 | 82.2 | R.YEEEEVALRATAE<br>NEFVALKK.D |                                       |

|         |              |      |       |           |         |       |                                                 |                                             |
|---------|--------------|------|-------|-----------|---------|-------|-------------------------------------------------|---------------------------------------------|
|         |              |      |       | 394 - 412 | 773.37  | 34.6  | K.AKQDMAALLKE<br>YQEVMSK.L                      | Carbamidomethyl:<br>7; Oxidation: 5, 16     |
|         |              |      |       | 149 - 160 | 776.94  | 80.9  | K.LLETKLQFYQNR<br>.Q                            |                                             |
|         |              |      |       | 238 - 257 | 783.12  | 70.8  | R.KSDLEANVEALI<br>QETDFLR.L                     |                                             |
|         |              |      |       | 348 - 361 | 796.4   | 89    | R.LTAEVENAKCQ<br>NSK.L                          | Carbamidomethyl:<br>10                      |
|         |              |      |       | 348 - 361 | 796.84  | 46.1  | R.LTAEVENAKCQ<br>NSK.L                          | Carbamidomethyl:<br>10; Deamidated: 7       |
|         |              |      |       | 284 - 304 | 801.74  | 68.2  | R.DLNMDNIVAEIK<br>AHYDDIASR.S                   |                                             |
|         |              |      |       | 284 - 304 | 807.43  | 50.1  | R.DLNMDNIVAEIK<br>AHYDDIASR.S                   | Oxidation: 4;<br>Deamidated: 3              |
|         |              |      |       | 142 - 160 | 814.09  | 71    | R.FLEQQNKLLET<br>LQFYQNR.Q                      |                                             |
|         |              |      |       | 258 - 278 | 814.79  | 54.3  | R.LYEEEIRVLQAH<br>SDTSVIVK.M                    |                                             |
|         |              |      |       | 161 - 180 | 824.77  | 39.8  | R.QCCESNLEPLFS<br>GYIETLR.R                     | Carbamidomethyl:<br>2, 3                    |
|         |              |      |       | 433 - 448 | 847.39  | 132.1 | R.LCEGVGAVNVC<br>VSSSR.G                        | Carbamidomethyl:<br>2, 11                   |
|         |              |      |       | 433 - 448 | 847.96  | 34.7  | R.LCEGVGAVNVC<br>VSSSR.G                        | Carbamidomethyl:<br>2, 11;<br>Deamidated: 9 |
|         |              |      |       | 357 - 381 | 877.74  | 72.1  | K.CQNSKLEAAVT<br>QAEQQGEAALAD<br>AK.C           | Carbamidomethyl:<br>1                       |
|         |              |      |       | 425 - 448 | 883.4   | 57.5  | R.LLEGEEQRLCE<br>GVGAVNVCVSSS<br>R.G            | Carbamidomethyl:<br>10, 19                  |
|         |              |      |       | 192 - 207 | 904.97  | 119.6 | R.LSSELNSLQEV<br>EGYK.K                         |                                             |
|         |              |      |       | 192 - 207 | 905.49  | 89    | R.LSSELNSLQEV<br>EGYK.K                         | Deamidated: 6                               |
|         |              |      |       | 192 - 207 | 905.95  | 36    | R.LSSELNSLQEV<br>EGYK.K                         | Deamidated: 6, 9                            |
|         |              |      |       | 83 - 101  | 915.95  | 64.9  | R.SGGVGGGLSP<br>PCITTVSVNE.S                    | Carbamidomethyl:<br>11                      |
|         |              |      |       | 192 - 208 | 968.98  | 75.6  | R.LSSELNSLQEV<br>EGYK.K                         |                                             |
|         |              |      |       | 192 - 208 | 969.53  | 40.3  | R.LSSELNSLQEV<br>EGYK.K                         | Deamidated: 6                               |
|         |              |      |       | 279 - 295 | 989.45  | 103.2 | K.MDNSRDLNMDN<br>IVAEIK.A                       |                                             |
|         |              |      |       | 181 - 207 | 995.45  | 47.7  | R.EAECADSGR<br>LSSELNSLQEV<br>GYK.K             | Carbamidomethyl:<br>4                       |
|         |              |      |       | 279 - 304 | 1003.43 | 48.3  | K.MDNSRDLNMDN<br>IVAEIKAHYDDIAS<br>R.S          | Deamidated: 3, 8                            |
|         |              |      |       | 362 - 381 | 1007.52 | 138.6 | K.LEAAVTQAEQQ<br>GAAALADAK.C                    |                                             |
|         |              |      |       | 102 - 119 | 1013.02 | 82.8  | E.SLLTPLNLEID<br>PNAQCQV.K                      | Carbamidomethyl:<br>16                      |
|         |              |      |       | 239 - 256 | 1032.05 | 125.8 | K.SDLEANVEAL<br>IQETDFLR.R                      |                                             |
|         |              |      |       | 238 - 256 | 1096.03 | 175.5 | R.KSDLEANVEAL<br>IQETDFLR.R                     |                                             |
|         |              |      |       | 83 - 116  | 1150.89 | 50.1  | R.SGGVGGGLSP<br>PCITTVSVNESLL<br>TPLNLEIDPNAQ.C | Carbamidomethyl:<br>11; Deamidated:<br>26   |
|         |              |      |       | 161 - 179 | 1158.61 | 94.5  | R.QCCESNLEPLFS<br>GYIETLR.R                     | Carbamidomethyl:<br>2, 3                    |
| KAP11.1 | gij999000018 | 16.7 | 525.8 | 145 - 156 | 511.56  | 33.5  | R.TYQQSCVSSCR                                   | Carbamidomethyl:                            |

|         |              |      |       |           |         |       |                                 |                                                     |
|---------|--------------|------|-------|-----------|---------|-------|---------------------------------|-----------------------------------------------------|
|         |              |      |       |           |         |       | R.I                             | 6, 10;<br>Deamidated: 4                             |
|         |              |      |       | 145 - 156 | 511.88  | 25.2  | R.TYQQSCVSSCR<br>R.I            | Carbamidomethyl:<br>6, 10;<br>Deamidated: 3, 4      |
|         |              |      |       | 145 - 155 | 688.24  | 73.1  | R.TYQQSCVSSCR.<br>R             | Carbamidomethyl:<br>6, 10                           |
|         |              |      |       | 145 - 155 | 688.74  | 79.5  | R.TYQQSCVSSCR.<br>R             | Carbamidomethyl:<br>6, 10;<br>Deamidated: 3         |
|         |              |      |       | 145 - 155 | 688.75  | 67.2  | R.TYQQSCVSSCR.<br>R             | Carbamidomethyl:<br>6, 10;<br>Deamidated: 4         |
|         |              |      |       | 145 - 155 | 689.24  | 58    | R.TYQQSCVSSCR.<br>R             | Carbamidomethyl:<br>6, 10;<br>Deamidated: 3, 4      |
|         |              |      |       | 121 - 135 | 752.89  | 44.9  | R.SISTVCQPVGGV<br>STI.C         | Carbamidomethyl:<br>6                               |
|         |              |      |       | 57 - 78   | 872.03  | 37.6  | C.CEPTVCQSTCY<br>QPTPCVSSPVR.V  | Carbamidomethyl:<br>1, 6, 10, 16;<br>Deamidated: 12 |
|         |              |      |       | 121 - 139 | 995.96  | 106.8 | R.SISTVCQPVGGV<br>STICQPT.C     | Carbamidomethyl:<br>6, 16                           |
| KAP13.1 | gij999000030 | 17.4 | 849.7 | 13 - 19   | 448.69  | 37    | L.SLRDHLR.Y                     |                                                     |
|         |              |      |       | 148 - 157 | 526.28  | 47.6  | R.SGQSLSFQPT.C                  |                                                     |
|         |              |      |       | 136 - 144 | 576.32  | 40.6  | R.SSFYRPTFF.S                   |                                                     |
|         |              |      |       | 136 - 145 | 619.83  | 32.2  | R.SSFYRPTFFS.S                  |                                                     |
|         |              |      |       | 80 - 90   | 638.81  | 40.8  | R.TSTFFSPCQTT.<br>C             | Carbamidomethyl:<br>8                               |
|         |              |      |       | 63 - 74   | 647.81  | 53.9  | R.TQTVVSSPCQT<br>S.C            | Carbamidomethyl:<br>9                               |
|         |              |      |       | 63 - 79   | 676.27  | 27.3  | R.TQTVVSSPCQT<br>SCYRPR.T       | Carbamidomethyl:<br>9, 13                           |
|         |              |      |       | 63 - 79   | 676.64  | 26.6  | R.TQTVVSSPCQT<br>SCYRPR.T       | Carbamidomethyl:<br>9, 13;<br>Deamidated: 10        |
|         |              |      |       | 148 - 161 | 706.8   | 42.8  | R.SGQSLSFQPTC<br>GSG.F          | Carbamidomethyl:<br>11                              |
|         |              |      |       | 136 - 147 | 741.34  | 41    | R.SSFYRPTFFSSR<br>.S            |                                                     |
|         |              |      |       | 148 - 163 | 861.91  | 104.7 | R.SGQSLSFQPTC<br>GSGFY.-        | Carbamidomethyl:<br>11                              |
|         |              |      |       | 148 - 163 | 862.36  | 87.2  | R.SGQSLSFQPTC<br>GSGFY.-        | Carbamidomethyl:<br>11; Deamidated: 3               |
|         |              |      |       | 20 - 36   | 934.35  | 119.4 | R.YSGSSCGSSFP<br>SNLVYR.T       | Carbamidomethyl:<br>6                               |
|         |              |      |       | 20 - 36   | 934.84  | 103.5 | R.YSGSSCGSSFP<br>SNLVYR.T       | Carbamidomethyl:<br>6; Deamidated: 13               |
| KAP15.1 | gij999000032 | 14.6 | 239.9 | 68 - 82   | 639.66  | 34.1  | R.FFQTSCSHPQN<br>FIFR.S         | Carbamidomethyl:<br>6; Deamidated: 10               |
|         |              |      |       | 68 - 82   | 958.41  | 98    | R.FFQTSCSHPQN<br>FIFR.S         | Carbamidomethyl:<br>6                               |
|         |              |      |       | 68 - 82   | 958.92  | 88.4  | R.FFQTSCSHPQN<br>FIFR.S         | Carbamidomethyl:<br>6; Deamidated: 3                |
| KAP16.2 | gij999000035 | 6    | 260.9 | 1 - 19    | 1063.96 | 124.5 | -<br>.SYYYGNYYGGLG<br>YGLGGFR.G |                                                     |
|         |              |      |       | 1 - 19    | 1064.47 | 136.3 | -<br>.SYYYGNYYGGLG<br>YGLGGFR.G | Deamidated: 6                                       |
| KAP19.1 | gij999000033 | 7.7  | 92.8  | 25 - 33   | 530.68  | 50.6  | R.GCGCGSFCR.L                   | Carbamidomethyl:<br>2, 4, 8                         |
| KAP19.3 | gij999000016 | 7.6  | 600   | 59 - 65   | 405.7   | 52.9  | R.CPSSFGR.Y                     | Carbamidomethyl:<br>1                               |

|                    |              |     |       |           |         |       |                                              |                                               |
|--------------------|--------------|-----|-------|-----------|---------|-------|----------------------------------------------|-----------------------------------------------|
|                    |              |     |       | 26 - 32   | 422.18  | 42    | G.CGCGSFR.R                                  | Carbamidomethyl:<br>1, 3                      |
|                    |              |     |       | 25 - 32   | 450.64  | 44.2  | R.GCGCGSFR.R                                 | Carbamidomethyl:<br>2, 4                      |
|                    |              |     |       | 15 - 24   | 462.75  | 40.5  | Y.GGFGGLGFR.<br>G                            |                                               |
|                    |              |     |       | 13 - 24   | 572.8   | 76.8  | Y.GYGGFGGLGFG<br>R.G                         |                                               |
|                    |              |     |       | 33 - 44   | 609.83  | 28.2  | R.RLGFSTGFGGY<br>G.C                         |                                               |
|                    |              |     |       | 12 - 24   | 654.33  | 66.7  | G.YGYGGFGGLGF<br>GR.G                        |                                               |
|                    |              |     |       | 9 - 24    | 767.88  | 101.9 | S.GLGYGYGGFGG<br>LGFR.G                      |                                               |
|                    |              |     |       | 59 - 72   | 831.33  | 45.8  | R.CPSSFGRYGF<br>SFY.-                        | Carbamidomethyl:<br>1                         |
|                    |              |     |       | 34 - 65   | 1122.11 | 53.3  | R.LGFSTGFGGYG<br>CGSGFGSFGYGY<br>NRCPSSFGR.Y | Carbamidomethyl:<br>12, 26;<br>Deamidated: 24 |
| KAP19.5            | gij999000015 | 7.7 | 588.2 | 26 - 32   | 422.18  | 42    | G.CGCGSFR.R                                  | Carbamidomethyl:<br>1, 3                      |
|                    |              |     |       | 34 - 41   | 427.2   | 56.1  | R.LGCGSGFR.G                                 | Carbamidomethyl:<br>3                         |
|                    |              |     |       | 25 - 32   | 450.64  | 44.2  | R.GCGCGSFR.R                                 | Carbamidomethyl:<br>2, 4                      |
|                    |              |     |       | 15 - 24   | 462.75  | 40.5  | Y.GGFGGLGFR.<br>G                            |                                               |
|                    |              |     |       | 65 - 72   | 512.22  | 35.4  | R.RCGFSSFY.-                                 | Carbamidomethyl:<br>2                         |
|                    |              |     |       | 13 - 24   | 572.8   | 76.8  | Y.GYGGFGGLGFG<br>R.G                         |                                               |
|                    |              |     |       | 12 - 24   | 654.33  | 66.7  | G.YGYGGFGGLGF<br>GR.G                        |                                               |
|                    |              |     |       | 42 - 55   | 677.75  | 74.1  | R.GYGCDSGFGSF<br>GSG.C                       | Carbamidomethyl:<br>4                         |
|                    |              |     |       | 9 - 24    | 767.88  | 101.9 | R.GLGYGYGGFGG<br>LGFR.G                      |                                               |
|                    |              |     |       | 42 - 64   | 876.7   | 33.2  | R.GYGCDSGFGSF<br>GSGCHRPLFFR.<br>R           | Carbamidomethyl:<br>4, 15, 16                 |
| KAP19.6            | gij999000034 | 7.7 | 466.5 | 26 - 32   | 422.18  | 42    | G.CGCGSFR.R                                  | Carbamidomethyl:<br>1, 3                      |
|                    |              |     |       | 25 - 32   | 450.64  | 44.2  | R.GCGCGSFR.R                                 | Carbamidomethyl:<br>2, 4                      |
|                    |              |     |       | 15 - 24   | 462.75  | 40.5  | Y.GGFGGLGFR.<br>G                            |                                               |
|                    |              |     |       | 65 - 72   | 512.22  | 35.4  | R.RCGFSSFY.-                                 | Carbamidomethyl:<br>2                         |
|                    |              |     |       | 13 - 24   | 572.8   | 76.8  | Y.GYGGFGGLGFG<br>R.G                         |                                               |
|                    |              |     |       | 12 - 24   | 654.33  | 66.7  | G.YGYGGFGGLGF<br>GR.G                        |                                               |
|                    |              |     |       | 9 - 24    | 767.88  | 101.9 | G.GLGYGYGGFGG<br>LGFR.G                      |                                               |
|                    |              |     |       | 1 - 24    | 851.69  | 58.9  | -<br>.CHYSNHYGGLGY<br>GYGGFGGLGFR.<br>G      | Carbamidomethyl:<br>1                         |
| KAP24.1<br>Partial | gij999000055 | 21  | 197.1 | 177 - 192 | 866.42  | 77.8  | R.SYQDLGFIPSGF<br>SASR.Y                     |                                               |
|                    |              |     |       | 23 - 38   | 929.44  | 119.3 | R.THYFPVTGSVA<br>LCSR.H                      | Carbamidomethyl:<br>14                        |
| KAP6.3             | gij999000020 | 8.3 | 815.5 | 42 - 49   | 460.19  | 45    | G.CGYGYGSR.S                                 | Carbamidomethyl:<br>1                         |
|                    |              |     |       | 21 - 35   | 566.29  | 25.3  | G.LGCGYGSCYGS                                | Carbamidomethyl:                              |

|                 |              |      |        |           |         |       |                               |                                         |
|-----------------|--------------|------|--------|-----------|---------|-------|-------------------------------|-----------------------------------------|
|                 |              |      |        |           |         |       | GFRR.L                        | 3, 8                                    |
|                 |              |      |        | 50 - 61   | 630.73  | 71.7  | R.SLCGSGYGCGS<br>R.P          | Carbamidomethyl:<br>3, 9                |
|                 |              |      |        | 36 - 47   | 642.24  | 50.8  | R.LGCGYGCGYGY<br>G.S          | Carbamidomethyl:<br>3, 7                |
|                 |              |      |        | 38 - 49   | 678.74  | 76.7  | G.CGYGCGYGYG<br>SR.S          | Carbamidomethyl:<br>1, 5                |
|                 |              |      |        | 70 - 82   | 719.28  | 46.1  | G.CGSGYGSGFGY<br>YY.-         | Carbamidomethyl:<br>1                   |
|                 |              |      |        | 36 - 49   | 763.79  | 98.2  | R.LGCGYGCGYGY<br>GSR.S        | Carbamidomethyl:<br>3, 7                |
|                 |              |      |        | 21 - 34   | 770.8   | 81.4  | G.LGCGYGSCYGS<br>GFR.R        | Carbamidomethyl:<br>3, 8                |
|                 |              |      |        | 50 - 64   | 817.33  | 27    | R.SLCGSGYGCGS<br>RPLY.G       | Carbamidomethyl:<br>3, 9                |
|                 |              |      |        | 35 - 49   | 841.79  | 73.5  | R.RLGCGYGCGYGY<br>YGSR.S      | Carbamidomethyl:<br>4, 8                |
|                 |              |      |        | 50 - 65   | 845.82  | 104.8 | R.SLCGSGYGCGS<br>RPLYG.C      | Carbamidomethyl:<br>3, 9                |
|                 |              |      |        | 50 - 68   | 1035.9  | 73.1  | R.SLCGSGYGCGS<br>RPLYGCGY.G   | Carbamidomethyl:<br>3, 9, 17            |
|                 |              |      |        | 50 - 69   | 1064.41 | 41.8  | R.SLCGSGYGCGS<br>RPLYGCGY.G.C | Carbamidomethyl:<br>3, 9, 17            |
| KAP8.1          | gij999000043 | 6.7  | 129.4  | 54 - 60   | 468.81  | 51.7  | R.RFWPFALY                    |                                         |
|                 |              |      |        | 54 - 61   | 550.3   | 61.2  | R.RFWPFALY.-                  |                                         |
| KAP9.2          | gij999000072 | 30.4 | 216.6  | 236 - 242 | 469.68  | 39.3  | R.TCYHPTC.C                   | Carbamidomethyl:<br>2, 7                |
|                 |              |      |        | 236 - 243 | 549.66  | 51.2  | R.TCYHPTCC.C                  | Carbamidomethyl:<br>2, 7, 8             |
|                 |              |      |        | 38 - 53   | 936.39  | 30.1  | R.TTCSKPTCVTTC<br>CQPA.C      | Carbamidomethyl:<br>3, 8, 12, 13        |
|                 |              |      |        | 277 - 291 | 952.78  | 78.3  | R.CRPSCVSSCCQ<br>PSCC.-       | Carbamidomethyl:<br>1, 5, 9, 10, 14, 15 |
| KAP9.2-<br>like | gij999000057 | 20.6 | 238.9  | 140 - 145 | 395.68  | 28.8  | R.ICYHPT.C                    | Carbamidomethyl:<br>2                   |
|                 |              |      |        | 140 - 146 | 475.73  | 40.4  | R.ICYHPTC.C                   | Carbamidomethyl:<br>2, 7                |
|                 |              |      |        | 140 - 147 | 555.73  | 50.8  | R.ICYHPTCC.C                  | Carbamidomethyl:<br>2, 7, 8             |
|                 |              |      |        | 16 - 30   | 930.29  | 77.2  | R.TTCESSGCQP<br>CCPR.T        | Carbamidomethyl:<br>3, 4, 9, 12, 13     |
| KAP4.9          | gij999000125 | 17.2 | 240.3  | 3 - 16    | 810.23  | 64.9  | S.SCCGSVCSDQS<br>CGR.S        | Carbamidomethyl:<br>2, 3, 7, 12         |
|                 |              |      |        | 2 - 16    | 853.76  | 69.8  | V.SSCCGSVCSDQ<br>SCGR.S       | Carbamidomethyl:<br>3, 4, 8, 13         |
|                 |              |      |        | 96 - 108  | 854.78  | 105.5 | R.CCQPVCCQPSC<br>PR.I         | Carbamidomethyl:<br>1, 2, 6, 7, 11      |
| K34             | gij309323371 | 46.6 | 6627.7 | 240 - 245 | 366.16  | 42.1  | R.VLNETR.A                    |                                         |
|                 |              |      |        | 152 - 158 | 412.21  | 62.1  | K.LASDDFR.T                   |                                         |
|                 |              |      |        | 83 - 89   | 412.24  | 59    | R.LASYLEK.V                   |                                         |
|                 |              |      |        | 208 - 218 | 442.91  | 71.7  | K.KNHEEEANSLR.<br>S           |                                         |
|                 |              |      |        | 219 - 226 | 451.77  | 30.7  | R.SQLGDRLN.V                  |                                         |
|                 |              |      |        | 201 - 207 | 452.73  | 35.1  | K.EELLCLK.K                   | Carbamidomethyl:<br>5                   |
|                 |              |      |        | 159 - 165 | 456.77  | 43.6  | R.TKYESER.S                   |                                         |
|                 |              |      |        | 96 - 103  | 474.21  | 51.3  | R.ENAELESR.I                  |                                         |
|                 |              |      |        | 374 - 382 | 482.26  | 41    | R.GLLDSEDSK.L                 |                                         |
|                 |              |      |        | 246 - 257 | 483.91  | 67.4  | R.AQYEALVETNR<br>R.D          |                                         |
|                 |              |      |        | 246 - 257 | 484.26  | 49    | R.AQYEALVETNR<br>R.D          | Deamidated: 2                           |
|                 |              |      |        | 125 - 132 | 494.74  | 62.4  | R.TIEELQQK.I                  |                                         |

|  |  |  |  |           |        |      |                             |                        |
|--|--|--|--|-----------|--------|------|-----------------------------|------------------------|
|  |  |  |  | 143 - 151 | 507.36 | 65.2 | R.LVIQIDNAK.L               |                        |
|  |  |  |  | 75 - 82   | 512.78 | 29.9 | E.TMQFLNDR.L                |                        |
|  |  |  |  | 75 - 82   | 520.79 | 47.5 | E.TMQFLNDR.L                | Oxidation: 2           |
|  |  |  |  | 152 - 160 | 526.82 | 26.4 | K.LASDDFRTK.Y               |                        |
|  |  |  |  | 117 - 124 | 537.81 | 50.6 | C.PNYQSYFR.T                |                        |
|  |  |  |  | 83 - 91   | 539.83 | 76.2 | R.LASYLEKVR.Q               |                        |
|  |  |  |  | 166 - 179 | 544    | 69.2 | R.SLRQLVESDINS<br>LR.R      |                        |
|  |  |  |  | 181 - 189 | 552.85 | 78.5 | R.ILDELTICK.S               | Carbamidomethyl:<br>8  |
|  |  |  |  | 258 - 265 | 555.25 | 54.6 | R.DVEEWYIR.Q                |                        |
|  |  |  |  | 365 - 373 | 562.76 | 65.1 | R.LESEINTYR.G               |                        |
|  |  |  |  | 365 - 373 | 563.28 | 59.6 | R.LESEINTYR.G               | Deamidated: 6          |
|  |  |  |  | 219 - 228 | 565.83 | 75.5 | R.SQLGDRLNVE.V              |                        |
|  |  |  |  | 124 - 132 | 572.81 | 46.6 | F.RTIEELQK.I                |                        |
|  |  |  |  | 152 - 165 | 572.99 | 41.5 | K.LASDDFRTKYES<br>ER.S      |                        |
|  |  |  |  | 90 - 103  | 577.27 | 32.6 | K.VRQLERENAELE<br>SR.I      | Deamidated: 3          |
|  |  |  |  | 74 - 82   | 577.29 | 63.1 | K.ETMQFLNDR.L               |                        |
|  |  |  |  | 74 - 82   | 577.79 | 43.9 | K.ETMQFLNDR.L               | Deamidated: 4          |
|  |  |  |  | 74 - 82   | 585.22 | 58.7 | K.ETMQFLNDR.L               | Oxidation: 3           |
|  |  |  |  | 166 - 180 | 596.02 | 60.8 | R.SLRQLVESDINS<br>LRR.I     |                        |
|  |  |  |  | 209 - 218 | 599.75 | 54   | K.NHEEEANSLR.S              |                        |
|  |  |  |  | 209 - 218 | 600.26 | 46.4 | K.NHEEEANSLR.S              | Deamidated: 1          |
|  |  |  |  | 190 - 200 | 609.87 | 97.6 | K.SDLEAQVESLK.<br>E         |                        |
|  |  |  |  | 198 - 207 | 616.9  | 40.9 | E.SLKEELLCLK.K              | Carbamidomethyl:<br>8  |
|  |  |  |  | 180 - 189 | 630.91 | 40.3 | R.RILDELTICK.S              | Carbamidomethyl:<br>9  |
|  |  |  |  | 257 - 265 | 633.28 | 53.4 | R.RDVEEWYIR.Q               |                        |
|  |  |  |  | 63 - 73   | 644.8  | 56.8 | W.FCEGSFNGNEK<br>.E         | Carbamidomethyl:<br>2  |
|  |  |  |  | 246 - 256 | 647.36 | 88.2 | R.AQYEALVETNR.<br>R         |                        |
|  |  |  |  | 293 - 309 | 664.4  | 59.1 | R.RTVNALEVELQA<br>QHNL.R.D  |                        |
|  |  |  |  | 240 - 256 | 669.35 | 64.4 | R.VLNETRAQYEAL<br>VETNR.R   |                        |
|  |  |  |  | 363 - 373 | 676.37 | 92.5 | K.ARLESEINTYR.G             |                        |
|  |  |  |  | 311 - 322 | 682.31 | 85.3 | D.SLENTLTETEAR.<br>Y        |                        |
|  |  |  |  | 374 - 386 | 687.84 | 51.6 | R.GLLDSEDSKLPS<br>N.P       |                        |
|  |  |  |  | 346 - 362 | 693.07 | 49.6 | R.SDLERQNQEYQ<br>VLLDVK.A   |                        |
|  |  |  |  | 72 - 82   | 705.85 | 53.4 | N.EKETMQFLNDR.<br>L         |                        |
|  |  |  |  | 125 - 142 | 716.39 | 64.3 | R.TIEELQKILCAK<br>SENSR.L   | Carbamidomethyl:<br>11 |
|  |  |  |  | 240 - 257 | 721.39 | 41.2 | R.VLNETRAQYEAL<br>VETNR.R.D |                        |
|  |  |  |  | 245 - 256 | 725.38 | 63.2 | T.RAQYEALVETNR<br>.R        |                        |
|  |  |  |  | 246 - 257 | 725.86 | 35.9 | R.AQYEALVETNR<br>R.D        | Deamidated: 10         |
|  |  |  |  | 196 - 207 | 730.94 | 73.1 | Q.VESLKEELLCLK.<br>K        | Carbamidomethyl:<br>10 |
|  |  |  |  | 92 - 103  | 737.36 | 53.4 | R.QLERENAELES               |                        |

|  |  |  |           |        |       |  |                                   |                              |
|--|--|--|-----------|--------|-------|--|-----------------------------------|------------------------------|
|  |  |  |           |        |       |  | R.I                               |                              |
|  |  |  | 92 - 103  | 737.8  | 57.7  |  | R.QLERENAELES<br>R.I              | Deamidated: 1                |
|  |  |  | 74 - 91   | 738.4  | 85.8  |  | K.ETMQFLNDRLA<br>SYLEKVR.Q        |                              |
|  |  |  | 310 - 322 | 739.86 | 110.7 |  | R.DSLENTLTETEA<br>R.Y             |                              |
|  |  |  | 310 - 322 | 740.35 | 84.4  |  | R.DSLENTLTETEA<br>R.Y             | Deamidated: 5                |
|  |  |  | 387 - 399 | 743.24 | 104.7 |  | N.PCATTNASSNF<br>CR.S             | Carbamidomethyl:<br>2, 12    |
|  |  |  | 74 - 91   | 743.73 | 32.9  |  | K.ETMQFLNDRLA<br>SYLEKVR.Q        | Oxidation: 3                 |
|  |  |  | 190 - 208 | 744.78 | 36.3  |  | K.SDLEAQVESLKE<br>ELLCLKK.N       | Carbamidomethyl:<br>16       |
|  |  |  | 18 - 29   | 753.85 | 65.7  |  | M.SYSCCLPTLSYR<br>.S              | Carbamidomethyl:<br>4, 5     |
|  |  |  | 297 - 309 | 760.93 | 66.3  |  | N.ALEVELQAQHNL<br>R.D             |                              |
|  |  |  | 219 - 239 | 761.77 | 25.3  |  | R.SQLGDRLNVEV<br>DAAPTVDLNR.V     | Deamidated: 2                |
|  |  |  | 346 - 364 | 768.73 | 86.3  |  | R.SDLERQNQEYQ<br>VLLDVKAR.L       |                              |
|  |  |  | 225 - 245 | 780.07 | 46.8  |  | R.LNVEVDAAPTVD<br>LNRVLNETR.A     |                              |
|  |  |  | 125 - 137 | 787.45 | 73.6  |  | R.TIEELQQKILCAK<br>.S             | Carbamidomethyl:<br>11       |
|  |  |  | 70 - 82   | 791.34 | 57.9  |  | N.GNEKETMQFLN<br>DR.L             |                              |
|  |  |  | 138 - 151 | 793.91 | 53.2  |  | K.SENSRLVIQIDN<br>AK.L            |                              |
|  |  |  | 138 - 158 | 798.06 | 35.4  |  | K.SENSRLVIQIDN<br>AKLASDDFR.T     | Deamidated: 12               |
|  |  |  | 225 - 239 | 813.43 | 102.5 |  | R.LNVEVDAAPTVD<br>LNR.V           |                              |
|  |  |  | 30 - 43   | 813.79 | 48.3  |  | R.SSCSSRPCVPS<br>SCR.G            | Carbamidomethyl:<br>3, 8, 13 |
|  |  |  | 106 - 124 | 815.01 | 74.1  |  | R.ERSQQQEPLLC<br>PNYQSYFR.T       | Carbamidomethyl:<br>11       |
|  |  |  | 273 - 293 | 821.78 | 44.7  |  | K.QVVSSEQLQS<br>YQAEIILRR.T       |                              |
|  |  |  | 231 - 245 | 834.92 | 43.4  |  | D.AAPTVDLNRVLN<br>ETR.A           |                              |
|  |  |  | 246 - 265 | 847.4  | 25.5  |  | R.AQYEALVETNR<br>RDVEEWYIR.Q      |                              |
|  |  |  | 351 - 364 | 852.44 | 56.5  |  | R.QNQEYQVLLDV<br>KAR.L            |                              |
|  |  |  | 90 - 103  | 864.89 | 63.8  |  | K.VRQLERENAELE<br>SR.I            |                              |
|  |  |  | 143 - 158 | 909.47 | 98.3  |  | R.LVIQIDNAKLASD<br>DFR.T          |                              |
|  |  |  | 75 - 89   | 914.97 | 89.7  |  | E.TMQFLNDRLAS<br>YLEK.V           |                              |
|  |  |  | 74 - 88   | 915.42 | 54.1  |  | K.ETMQFLNDRLA<br>SYLE.K           |                              |
|  |  |  | 294 - 309 | 917.99 | 119.9 |  | R.TVNALEVELQAQ<br>HNLR.D          |                              |
|  |  |  | 294 - 309 | 918.46 | 65    |  | R.TVNALEVELQAQ<br>HNLR.D          | Deamidated: 3                |
|  |  |  | 294 - 309 | 918.47 | 86.3  |  | R.TVNALEVELQAQ<br>HNLR.D          | Deamidated: 10               |
|  |  |  | 286 - 309 | 939.52 | 63    |  | Q.AEIIELRRTVNAL<br>EVELQAQHNL.R.D | Deamidated: 11               |
|  |  |  | 374 - 399 | 947.74 | 76    |  | R.GLLDSEDSKLPS<br>NPCATTNASSNFC   | Carbamidomethyl:<br>15, 25   |

|     |              |      |        |           |         |       |                                           |                                               |
|-----|--------------|------|--------|-----------|---------|-------|-------------------------------------------|-----------------------------------------------|
|     |              |      |        |           |         |       | R.S                                       |                                               |
|     |              |      |        | 374 - 399 | 948.09  | 92    | R.GLLDSEDSKLPS<br>NPCATTNASSNFC<br>R.S    | Carbamidomethyl:<br>15, 25;<br>Deamidated: 19 |
|     |              |      |        | 383 - 399 | 948.85  | 128   | K.LPSNPCATTNAS<br>SNFCR.S                 | Carbamidomethyl:<br>6, 16                     |
|     |              |      |        | 258 - 272 | 976.47  | 63.8  | R.DVEEWYIRQTE<br>ELNK.Q                   |                                               |
|     |              |      |        | 74 - 89   | 979.47  | 57.9  | K.ETMQFLNDRLA<br>SYLEK.V                  |                                               |
|     |              |      |        | 74 - 89   | 979.98  | 64.9  | K.ETMQFLNDRLA<br>SYLEK.V                  | Deamidated: 7                                 |
|     |              |      |        | 74 - 89   | 987.46  | 36.8  | K.ETMQFLNDRLA<br>SYLEK.V                  | Oxidation: 3                                  |
|     |              |      |        | 181 - 197 | 988.5   | 46.1  | R.ILDELTCKSDLE<br>AQVE.S                  | Carbamidomethyl:<br>8                         |
|     |              |      |        | 219 - 245 | 998.85  | 36    | R.SQLGDRLNVEV<br>DAAPTVDLNRVLN<br>ETR.A   |                                               |
|     |              |      |        | 190 - 207 | 1052.61 | 104.4 | K.SDLEAQVESLKE<br>ELLCLK.K                | Carbamidomethyl:<br>16                        |
|     |              |      |        | 181 - 207 | 1064.23 | 28    | R.ILDELTCKSDLE<br>AQVESLKEELLCL<br>K.K    | Carbamidomethyl:<br>8, 25;<br>Deamidated: 15  |
|     |              |      |        | 45 - 73   | 1067.79 | 46.2  | G.TTLPGACNIPAN<br>VGSCNWFCEGSF<br>NGNEK.E | Carbamidomethyl:<br>7, 16, 20                 |
|     |              |      |        | 108 - 124 | 1079.49 | 91.7  | R.SQQQEPLLCPN<br>YQSYFR.T                 | Carbamidomethyl:<br>9                         |
|     |              |      |        | 108 - 124 | 1079.99 | 81.4  | R.SQQQEPLLCPN<br>YQSYFR.T                 | Carbamidomethyl:<br>9; Deamidated: 2          |
|     |              |      |        | 294 - 322 | 1099.23 | 38.1  | R.TVNALEVELQAQ<br>HNLRDSENTLLE<br>TEAR.Y  | Deamidated: 12                                |
|     |              |      |        | 219 - 239 | 1141.56 | 82.6  | R.SQLGDRLNVEV<br>DAAPTVDLNR.V             |                                               |
|     |              |      |        | 219 - 239 | 1142.06 | 34    | R.SQLGDRLNVEV<br>DAAPTVDLNR.V             | Deamidated: 20                                |
| K75 | gj 999000081 | 58.8 | 373.7  | 164 - 170 | 453.75  | 35.3  | R.FLEQQNK.V                               |                                               |
|     |              |      |        | 308 - 319 | 651.91  | 107.7 | R.SLDLDSIIAEVK.<br>A                      |                                               |
| K83 | gj 312283588 | 53.9 | 6856.2 | 219 - 227 | 375.85  | 29.3  | K.DVDCAYVRK.S                             | Carbamidomethyl:<br>4                         |
|     |              |      |        | 39 - 44   | 378.17  | 30.9  | R.GISCYR.G                                | Carbamidomethyl:<br>4                         |
|     |              |      |        | 122 - 128 | 406.2   | 52.8  | R.FAAFIDK.V                               |                                               |
|     |              |      |        | 45 - 53   | 426.21  | 57.8  | R.GLTGGFGSR.S                             |                                               |
|     |              |      |        | 131 - 137 | 453.75  | 35.3  | R.FLEQQNK.L                               |                                               |
|     |              |      |        | 402 - 413 | 473.93  | 60.9  | K.LGLDIEIATYRR.L                          |                                               |
|     |              |      |        | 247 - 253 | 476.25  | 53.8  | R.LYEEEIR.V                               |                                               |
|     |              |      |        | 143 - 149 | 477.31  | 43.4  | K.LQFFQNR.Q                               | Deamidated: 6                                 |
|     |              |      |        | 414 - 421 | 487.22  | 73.6  | R.LLEGEEQR.L                              |                                               |
|     |              |      |        | 337 - 345 | 487.78  | 54.2  | R.LTAEVENAK.C                             |                                               |
|     |              |      |        | 117 - 128 | 490.26  | 48.4  | K.CLNNRFAAFIDK.<br>V                      | Carbamidomethyl:<br>1                         |
|     |              |      |        | 294 - 305 | 490.58  | 47.6  | R.SRAEAEWYRS<br>K.C                       |                                               |
|     |              |      |        | 333 - 345 | 490.94  | 57.7  | R.VIQRLTAEVENA<br>K.C                     |                                               |
|     |              |      |        | 219 - 226 | 499.25  | 55.5  | K.DVDCAYVR.K                              | Carbamidomethyl:<br>4                         |
|     |              |      |        | 44 - 53   | 504.24  | 30.1  | Y.RGLTGGFGSR.S                            |                                               |

|  |  |  |  |           |        |      |                          |                                      |
|--|--|--|--|-----------|--------|------|--------------------------|--------------------------------------|
|  |  |  |  | 199 - 206 | 504.78 | 64.6 | K.YEEEEVALR.A            |                                      |
|  |  |  |  | 325 - 336 | 504.93 | 31.9 | K.EEINELNRVIQR.<br>L     |                                      |
|  |  |  |  | 296 - 303 | 506.22 | 60.9 | R.AEAESWYR.S             |                                      |
|  |  |  |  | 16 - 29   | 507.88 | 42.1 | R.AFSCVSACGPR<br>PGR.C   | Carbamidomethyl:<br>4, 8             |
|  |  |  |  | 325 - 332 | 508.75 | 40.7 | K.EEINELNR.V             |                                      |
|  |  |  |  | 285 - 293 | 519.76 | 75   | K.AQYDDIASR.S            |                                      |
|  |  |  |  | 285 - 293 | 520.26 | 25.9 | K.AQYDDIASR.S            | Deamidated: 2                        |
|  |  |  |  | 39 - 53   | 529.94 | 37.5 | R.GISCYRGLTGGF<br>GSR.S  | Carbamidomethyl:<br>4                |
|  |  |  |  | 122 - 130 | 533.78 | 70   | R.FAAFIDKVR.F            |                                      |
|  |  |  |  | 373 - 382 | 536.29 | 87.2 | K.LAGLEELQK.A            |                                      |
|  |  |  |  | 414 - 422 | 543.8  | 53.2 | R.LLEGEEQRL.C            |                                      |
|  |  |  |  | 246 - 253 | 554.32 | 49.9 | R.RLYEEEEIR.V            |                                      |
|  |  |  |  | 30 - 38   | 556.29 | 67.9 | R.CCITAAPYR.G            | Carbamidomethyl:<br>1, 2             |
|  |  |  |  | 393 - 401 | 564.25 | 51.7 | K.EYQEVMSK.L             |                                      |
|  |  |  |  | 413 - 421 | 565.27 | 54.6 | R.RLLEGEEQR.L            |                                      |
|  |  |  |  | 198 - 206 | 568.81 | 73.8 | K.KYEEEEVALR.A           |                                      |
|  |  |  |  | 117 - 130 | 575.66 | 44.3 | K.CLNNRFAAFIDK<br>VR.F   | Carbamidomethyl:<br>1; Deamidated: 3 |
|  |  |  |  | 4 - 15    | 579.81 | 77.2 | C.GFSTVSGSGFS<br>R.A     |                                      |
|  |  |  |  | 323 - 336 | 581.36 | 57.6 | R.TKEEINELNRVIQ<br>R.L   |                                      |
|  |  |  |  | 323 - 336 | 581.67 | 50   | R.TKEEINELNRVIQ<br>R.L   | Deamidated: 6                        |
|  |  |  |  | 129 - 142 | 582.65 | 27.6 | K.VRFLEQQNKLE<br>TK.L    |                                      |
|  |  |  |  | 383 - 392 | 589.31 | 71.3 | K.AKQDMACLLK.E           | Carbamidomethyl:<br>7                |
|  |  |  |  | 207 - 217 | 596.83 | 83.1 | R.ATAENEFVALK.<br>K      |                                      |
|  |  |  |  | 372 - 382 | 600.38 | 84.8 | C.KLAGLEELQK.<br>A       |                                      |
|  |  |  |  | 268 - 277 | 605.76 | 41.2 | K.MDNSRDNLMD.<br>C       |                                      |
|  |  |  |  | 16 - 26   | 606.22 | 73.9 | R.AFSCVSACGPR.<br>P      | Carbamidomethyl:<br>4, 8             |
|  |  |  |  | 306 - 315 | 609.86 | 73.6 | K.CEEIKATVIR.H           | Carbamidomethyl:<br>1                |
|  |  |  |  | 102 - 116 | 610.3  | 58.1 | D.PNAQCVKQEEK<br>EQIK.C  | Carbamidomethyl:<br>5                |
|  |  |  |  | 170 - 180 | 611.72 | 87.5 | R.EAECVEADSGR.<br>L      | Carbamidomethyl:<br>4                |
|  |  |  |  | 337 - 352 | 612.01 | 40.4 | R.LTAEVENAKCQ<br>NSKLE.A | Carbamidomethyl:<br>10               |
|  |  |  |  | 296 - 305 | 613.77 | 54.7 | R.AEAESWYRSK.C           |                                      |
|  |  |  |  | 30 - 44   | 616.6  | 35   | R.CCITAAPYRGIS<br>CYR.G  | Carbamidomethyl:<br>1, 2, 13         |
|  |  |  |  | 413 - 422 | 621.87 | 37.2 | R.RLLEGEEQRL.C           |                                      |
|  |  |  |  | 323 - 332 | 623.33 | 85.6 | R.TKEEINELNR.V           |                                      |
|  |  |  |  | 294 - 303 | 627.84 | 69.5 | R.SRAEAESWYR.S           |                                      |
|  |  |  |  | 402 - 412 | 632.39 | 96.6 | K.LGLDIEIATYR.R          |                                      |
|  |  |  |  | 197 - 206 | 632.87 | 65   | K.KKYEEEEVALR.A          |                                      |
|  |  |  |  | 29 - 38   | 634.25 | 35.1 | G.RCCITAAPYR.G           | Carbamidomethyl:<br>2, 3             |
|  |  |  |  | 373 - 384 | 635.89 | 76.4 | K.LAGLEELQKAK<br>.Q      |                                      |
|  |  |  |  | 285 - 295 | 641.34 | 39.8 | K.AQYDDIASRSR.           |                                      |

|  |  |  |           |        |       |  |                                 |                                         |
|--|--|--|-----------|--------|-------|--|---------------------------------|-----------------------------------------|
|  |  |  |           |        |       |  | A                               |                                         |
|  |  |  | 98 - 108  | 643.84 | 65    |  | N.LEIDPNAQCVK.<br>Q             | Carbamidomethyl:<br>9                   |
|  |  |  | 181 - 197 | 658.38 | 35.7  |  | R.LSSELNHHVQEV<br>L EGYKK.K     |                                         |
|  |  |  | 207 - 218 | 660.82 | 87.3  |  | R.ATAENEFVALKK<br>.D            |                                         |
|  |  |  | 371 - 382 | 680.42 | 93.2  |  | R.CKLAGLEELQK<br>.A             | Carbamidomethyl:<br>1                   |
|  |  |  | 54 - 66   | 685.77 | 33.5  |  | R.SVCGGFRAGSC<br>GR.S           | Carbamidomethyl:<br>3, 11               |
|  |  |  | 385 - 401 | 696.37 | 30.4  |  | K.QDMAKLLKEYQ<br>EVMNSK.L       | Carbamidomethyl:<br>5                   |
|  |  |  | 181 - 198 | 701.04 | 26.8  |  | R.LSSELNHHVQEV<br>L EGYKKK.Y    |                                         |
|  |  |  | 322 - 332 | 701.36 | 63.2  |  | R.RTKKEINELNR.<br>V             |                                         |
|  |  |  | 2 - 15    | 710.27 | 112.4 |  | M.TCGFSTVGS<br>GSR.A            | Carbamidomethyl:<br>2                   |
|  |  |  | 273 - 284 | 710.88 | 101.6 |  | R.DLNMDICIVAEI<br>K.A           | Carbamidomethyl:<br>6                   |
|  |  |  | 438 - 451 | 711.78 | 101.9 |  | R.GGVVCGDLCV<br>S GSR.P         | Carbamidomethyl:<br>5, 9                |
|  |  |  | 304 - 315 | 717.35 | 80.3  |  | R.SKCEEIKATVIR<br>.H            | Carbamidomethyl:<br>3                   |
|  |  |  | 273 - 284 | 718.85 | 83    |  | R.DLNMDICIVAEI<br>K.A           | Carbamidomethyl:<br>6; Oxidation: 4     |
|  |  |  | 254 - 267 | 743.95 | 105.8 |  | R.VLQANISDTSVI<br>V K.M         |                                         |
|  |  |  | 131 - 142 | 745.9  | 62.8  |  | R.FLEQQNKLETK<br>.L             |                                         |
|  |  |  | 131 - 142 | 746.4  | 57.5  |  | R.FLEQQNKLETK<br>.L             | Deamidated: 6                           |
|  |  |  | 373 - 392 | 749.43 | 37.7  |  | K.LAGLEELQKAK<br>QDMAKLLK.E     | Carbamidomethyl:<br>17; Oxidation: 15   |
|  |  |  | 383 - 401 | 762.68 | 55.4  |  | K.AKQDMAKLLKE<br>YQEVMSK.L      | Carbamidomethyl:<br>7                   |
|  |  |  | 40 - 53   | 765.81 | 40.4  |  | G.ISCYRGLTGGF<br>G SR.S         | Carbamidomethyl:<br>3                   |
|  |  |  | 383 - 401 | 768.04 | 42.5  |  | K.AKQDMAKLLKE<br>YQEVMSK.L      | Carbamidomethyl:<br>7; Oxidation: 16    |
|  |  |  | 138 - 149 | 768.93 | 86.1  |  | K.LLETKLQFFQNR<br>.Q            |                                         |
|  |  |  | 199 - 218 | 770.74 | 82.2  |  | K.YEEVEALRATAE<br>NEFVALKK.D    |                                         |
|  |  |  | 383 - 401 | 773.37 | 34.6  |  | K.AKQDMAKLLKE<br>YQEVMSK.L      | Carbamidomethyl:<br>7; Oxidation: 5, 16 |
|  |  |  | 349 - 370 | 776.78 | 49    |  | N.SKLEAAVTQAE<br>QQGEVALNDAR.C  |                                         |
|  |  |  | 227 - 246 | 783.1  | 57.4  |  | R.KSDLEANSEALI<br>QEIDFLRR.L    |                                         |
|  |  |  | 337 - 350 | 796.4  | 89    |  | R.LTAEVENAKCQ<br>NSK.L          | Carbamidomethyl:<br>10                  |
|  |  |  | 337 - 350 | 796.84 | 46.1  |  | R.LTAEVENAKCQ<br>NSK.L          | Carbamidomethyl:<br>10; Deamidated: 7   |
|  |  |  | 131 - 149 | 808.75 | 57.1  |  | R.FLEQQNKLETK<br>LQFFQNR.Q      |                                         |
|  |  |  | 273 - 293 | 814.09 | 102.2 |  | R.DLNMDICIVAEI<br>K AQYDDIASR.S | Carbamidomethyl:<br>6                   |
|  |  |  | 273 - 293 | 814.41 | 36.9  |  | R.DLNMDICIVAEI<br>K AQYDDIASR.S | Carbamidomethyl:<br>6; Deamidated: 3    |
|  |  |  | 273 - 293 | 819.4  | 69.3  |  | R.DLNMDICIVAEI<br>K AQYDDIASR.S | Carbamidomethyl:<br>6; Oxidation: 4     |
|  |  |  | 150 - 169 | 838.73 | 28.6  |  | R.QCCESNLEPLFE<br>GYIETLRR.E    | Carbamidomethyl:<br>2, 3                |
|  |  |  | 149 - 168 | 839.02 | 37.1  |  | N.RQCCESNLEPL                   | Carbamidomethyl:                        |

|     |              |      |        |           |         |       |                                       |                                          |
|-----|--------------|------|--------|-----------|---------|-------|---------------------------------------|------------------------------------------|
|     |              |      |        |           |         |       | FEGYIETLR.R                           | 3, 4; Deamidated: 7                      |
|     |              |      |        | 422 - 437 | 847.39  | 132.1 | R.LCEGVGAVNVC<br>VSSSR.G              | Carbamidomethyl: 2, 11                   |
|     |              |      |        | 422 - 437 | 847.96  | 34.7  | R.LCEGVGAVNVC<br>VSSSR.G              | Carbamidomethyl: 2, 11;<br>Deamidated: 9 |
|     |              |      |        | 246 - 267 | 859.14  | 32.1  | R.RLYEEEEIRVLQA<br>NISDTSVIVK.M       |                                          |
|     |              |      |        | 414 - 437 | 883.4   | 57.5  | R.LLEGEEQRLCE<br>GVGAVNVCVSSS<br>R.G  | Carbamidomethyl: 10, 19                  |
|     |              |      |        | 346 - 370 | 910.77  | 86    | K.CQNSKLEAAVT<br>QAEQQGEVALND<br>AR.C | Carbamidomethyl: 1                       |
|     |              |      |        | 346 - 370 | 911.11  | 33.5  | K.CQNSKLEAAVT<br>QAEQQGEVALND<br>AR.C | Carbamidomethyl: 1; Deamidated: 15       |
|     |              |      |        | 181 - 196 | 922.97  | 108.1 | R.LSSELNHVQEV<br>L<br>EGYK.K          |                                          |
|     |              |      |        | 268 - 284 | 1012.43 | 96.1  | K.MDNSRDLNMDC<br>IVAEIK.A             | Carbamidomethyl: 11                      |
|     |              |      |        | 91 - 108  | 1013.02 | 82.8  | E.SLLTPLNLEIDPN<br>AQCVK.Q            | Carbamidomethyl: 16                      |
|     |              |      |        | 228 - 245 | 1032.47 | 45.2  | K.SDLEANSEALIQ<br>EIDFLR.R            | Deamidated: 6                            |
|     |              |      |        | 351 - 370 | 1057    | 144   | K.LEAAVTQAEQQ<br>GEVALNDAR.C          |                                          |
|     |              |      |        | 351 - 370 | 1057.51 | 117.3 | K.LEAAVTQAEQQ<br>GEVALNDAR.C          | Deamidated: 17                           |
|     |              |      |        | 351 - 370 | 1057.56 | 75.8  | K.LEAAVTQAEQQ<br>GEVALNDAR.C          | Deamidated: 7                            |
|     |              |      |        | 227 - 245 | 1096.55 | 59.2  | R.KSDLEANSEALI<br>QEIDFLR.R           | Deamidated: 7                            |
|     |              |      |        | 150 - 168 | 1179.55 | 107.6 | R.QCCESNLEPLFE<br>GYIETLR.R           | Carbamidomethyl: 2, 3                    |
| K85 | gij164652870 | 56.3 | 5157.3 | 156 - 165 | 412.87  | 31.3  | K.CEEMKATVIR.H                        | Carbamidomethyl: 1                       |
|     |              |      |        | 19 - 30   | 452.59  | 30.6  | R.REAEHVADSG<br>R.L                   |                                          |
|     |              |      |        | 252 - 263 | 473.93  | 60.9  | K.LGLDIEIATYRR.L                      |                                          |
|     |              |      |        | 264 - 271 | 487.22  | 73.6  | R.LLEGEEQR.L                          |                                          |
|     |              |      |        | 144 - 155 | 490.58  | 47.6  | R.SRAEASWYRS<br>K.C                   |                                          |
|     |              |      |        | 187 - 195 | 494.82  | 65.5  | R.LTAEIENAK.C                         |                                          |
|     |              |      |        | 49 - 56   | 504.78  | 64.6  | K.YEEVEALR.A                          |                                          |
|     |              |      |        | 175 - 186 | 504.93  | 31.9  | K.EEINELNRVIQR.<br>L                  |                                          |
|     |              |      |        | 146 - 153 | 506.22  | 60.9  | R.AEAEWYR.S                           |                                          |
|     |              |      |        | 69 - 76   | 506.24  | 47.7  | K.DVDCAYLR.K                          | Carbamidomethyl: 4                       |
|     |              |      |        | 175 - 182 | 508.75  | 40.7  | K.EEINELNR.V                          |                                          |
|     |              |      |        | 135 - 143 | 519.76  | 75    | K.AQYDDIASR.S                         |                                          |
|     |              |      |        | 135 - 143 | 520.26  | 25.9  | K.AQYDDIASR.S                         | Deamidated: 2                            |
|     |              |      |        | 328 - 337 | 523.18  | 66.5  | R.ASSFSCGSSR.S                        | Carbamidomethyl: 6                       |
|     |              |      |        | 223 - 232 | 536.29  | 87.2  | K.LAGLEEALQK.A                        |                                          |
|     |              |      |        | 264 - 272 | 543.8   | 53.2  | R.LLEGEEQRL.C                         |                                          |
|     |              |      |        | 243 - 251 | 564.25  | 51.7  | K.EYQEVMSK.L                          |                                          |
|     |              |      |        | 263 - 271 | 565.27  | 54.6  | R.RLLEGEEQR.L                         |                                          |
|     |              |      |        | 48 - 56   | 568.81  | 73.8  | K.KYEEVEALR.A                         |                                          |
|     |              |      |        | 69 - 77   | 570.28  | 47.7  | K.DVDCAYLRK.S                         | Carbamidomethyl:                         |

|  |  |  |  |           |        |       |                                |                                                 |
|--|--|--|--|-----------|--------|-------|--------------------------------|-------------------------------------------------|
|  |  |  |  |           |        |       |                                | 4                                               |
|  |  |  |  | 68 - 76   | 570.31 | 68.3  | K.KDVDCAYLR.K                  | Carbamidomethyl: 5                              |
|  |  |  |  | 173 - 186 | 581.36 | 57.6  | R.TKEEINELNRVIQ<br>R.L         |                                                 |
|  |  |  |  | 173 - 186 | 581.67 | 50    | R.TKEEINELNRVIQ<br>R.L         | Deamidated: 6                                   |
|  |  |  |  | 233 - 242 | 589.31 | 71.3  | K.AKQDMACLLK.E                 | Carbamidomethyl: 7                              |
|  |  |  |  | 20 - 30   | 600.24 | 77.6  | R.EAEHVEADSGR.<br>L            |                                                 |
|  |  |  |  | 222 - 232 | 600.38 | 84.8  | S.KLAGLEEALQK.<br>A            |                                                 |
|  |  |  |  | 118 - 127 | 605.76 | 41.2  | K.MDNSRDLNMD.<br>C             |                                                 |
|  |  |  |  | 57 - 67   | 610.88 | 60.6  | R.ATAENEFVVLK.<br>K            |                                                 |
|  |  |  |  | 146 - 155 | 613.77 | 54.7  | R.AEAEWYRSK.C                  |                                                 |
|  |  |  |  | 263 - 272 | 621.87 | 37.2  | R.RLLEGEEQRL.C                 |                                                 |
|  |  |  |  | 173 - 182 | 623.33 | 85.6  | R.TKEEINELNR.V                 |                                                 |
|  |  |  |  | 144 - 153 | 627.84 | 69.5  | R.SRAEAEWYR.S                  |                                                 |
|  |  |  |  | 252 - 262 | 632.39 | 96.6  | K.LGLDIEIATYR.R                |                                                 |
|  |  |  |  | 47 - 56   | 632.87 | 65    | K.KKYEEEVALR.A                 |                                                 |
|  |  |  |  | 223 - 234 | 635.89 | 76.4  | K.LAGLEEALQKAK<br>.Q           |                                                 |
|  |  |  |  | 135 - 145 | 641.34 | 39.8  | K.AQYDDIASRSR.<br>A            |                                                 |
|  |  |  |  | 221 - 232 | 643.91 | 102.5 | R.SKLAGLEEALQK<br>.A           |                                                 |
|  |  |  |  | 31 - 47   | 653.06 | 35.8  | R.LASELNHVQEV<br>EGYKK.K       |                                                 |
|  |  |  |  | 31 - 47   | 653.38 | 26.8  | R.LASELNHVQEV<br>EGYKK.K       | Deamidated: 6                                   |
|  |  |  |  | 118 - 134 | 670.69 | 63.3  | K.MDNSRDLNMDC<br>VVAEIK.A      | Carbamidomethyl: 11                             |
|  |  |  |  | 57 - 68   | 674.88 | 82    | R.ATAENEFVVLK<br>.D            |                                                 |
|  |  |  |  | 235 - 251 | 696.37 | 30.4  | K.QDMACLLKEYQ<br>EVMNSK.L      | Carbamidomethyl: 5                              |
|  |  |  |  | 172 - 182 | 701.36 | 63.2  | R.RTKEEINELNR.V                |                                                 |
|  |  |  |  | 123 - 134 | 703.87 | 87.8  | R.DLNMDCCVVAEIK<br>.A          | Carbamidomethyl: 6                              |
|  |  |  |  | 123 - 134 | 711.89 | 85.7  | R.DLNMDCCVVAEIK<br>.A          | Carbamidomethyl: 6; Oxidation: 4                |
|  |  |  |  | 123 - 134 | 712.27 | 32    | R.DLNMDCCVVAEIK<br>.A          | Carbamidomethyl: 6; Oxidation: 4; Deamidated: 3 |
|  |  |  |  | 187 - 198 | 716.85 | 95.5  | R.LTAEIENAKCQR.<br>T           | Carbamidomethyl: 10                             |
|  |  |  |  | 289 - 303 | 728.83 | 75.5  | G.GVACGGLTYSS<br>TAGR.Q        | Carbamidomethyl: 4                              |
|  |  |  |  | 183 - 195 | 742.89 | 71    | R.VIQRLTAEIENAK<br>.C          |                                                 |
|  |  |  |  | 221 - 234 | 743.46 | 71.6  | R.SKLAGLEEALQK<br>AK.Q         |                                                 |
|  |  |  |  | 223 - 242 | 749.43 | 37.7  | K.LAGLEEALQKAK<br>QDMACLLK.E   | Carbamidomethyl: 17; Oxidation: 15              |
|  |  |  |  | 288 - 303 | 757.34 | 89.6  | R.GGVACGGLTYS<br>STAGR.Q       | Carbamidomethyl: 5                              |
|  |  |  |  | 233 - 251 | 762.68 | 55.4  | K.AKQDMACLLKE<br>YQEVMSK.L     | Carbamidomethyl: 7                              |
|  |  |  |  | 199 - 220 | 762.7  | 71.2  | R.TKLEAAVAEAEQ<br>QGAAALNDAR.S | Deamidated: 12                                  |

|        |              |      |       |           |         |       |                                          |                                             |
|--------|--------------|------|-------|-----------|---------|-------|------------------------------------------|---------------------------------------------|
|        |              |      |       | 77 - 96   | 764.39  | 97.5  | R.KSDLEANVEALV<br>EESNFLKR.L             |                                             |
|        |              |      |       | 233 - 251 | 768.04  | 42.5  | K.AKQDMACLLKE<br>YQEVMSK.L               | Carbamidomethyl:<br>7; Oxidation: 16        |
|        |              |      |       | 233 - 251 | 773.37  | 34.6  | K.AKQDMACLLKE<br>YQEVMSK.L               | Carbamidomethyl:<br>7; Oxidation: 5, 16     |
|        |              |      |       | 1 - 19    | 791.08  | 55.4  | -<br>.CCESNLEPLFNGY<br>IETLRR.E          | Carbamidomethyl:<br>1, 2                    |
|        |              |      |       | 97 - 117  | 800.78  | 73.9  | R.LYDEEIQILNAHI<br>SDTSVIVK.M            |                                             |
|        |              |      |       | 97 - 117  | 801.13  | 55.4  | R.LYDEEIQILNAHI<br>SDTSVIVK.M            | Deamidated: 10                              |
|        |              |      |       | 123 - 143 | 809.43  | 83.4  | R.DLNMDCVVAEIK<br>AQYDDIASR.S            | Carbamidomethyl:<br>6                       |
|        |              |      |       | 123 - 143 | 814.73  | 77.1  | R.DLNMDCVVAEIK<br>AQYDDIASR.S            | Carbamidomethyl:<br>6; Oxidation: 4         |
|        |              |      |       | 272 - 287 | 855.39  | 122   | R.LCEGVGSVNVC<br>VSSSR.G                 | Carbamidomethyl:<br>2, 11                   |
|        |              |      |       | 203 - 220 | 907.41  | 125.1 | E.AAVAEAEQQGE<br>AALNDAR.S               |                                             |
|        |              |      |       | 31 - 46   | 914.99  | 94.4  | R.LASELNHVQEV<br>EGYK.K                  |                                             |
|        |              |      |       | 78 - 95   | 1004    | 111.9 | K.SDLEANVEALVE<br>ESNFLK.R               |                                             |
|        |              |      |       | 201 - 220 | 1028.52 | 147.1 | K.LEAAVAEAEQQ<br>GAAALNDAR.S             |                                             |
|        |              |      |       | 201 - 220 | 1028.97 | 131.9 | K.LEAAVAEAEQQ<br>GAAALNDAR.S             | Deamidated: 17                              |
|        |              |      |       | 199 - 220 | 1143.03 | 151.1 | R.TKLEAAVAEAEQ<br>QGAAALNDAR.S           |                                             |
|        |              |      |       | 304 - 327 | 1191.59 | 103.9 | R.QIASGPVATGGS<br>ITVLAPDSCQPR.A         | Carbamidomethyl:<br>21                      |
| KAP7   | gij224555962 | 8.8  | 439   | 27 - 37   | 570.85  | 36    | R.ATPLNCVVPLG.<br>S                      | Carbamidomethyl:<br>6                       |
|        |              |      |       | 4 - 23    | 822.01  | 74.6  | R.FFCCGSYFPGY<br>PSYGTNFHR.T             | Carbamidomethyl:<br>3, 4                    |
|        |              |      |       | 27 - 43   | 857.96  | 32.2  | R.ATPLNCVVPLGS<br>PLGYG.C                | Carbamidomethyl:<br>6                       |
|        |              |      |       | 2 - 23    | 907.7   | 76.2  | M.TRFFCCGSYFP<br>GYPSYGTNFHR.T           | Carbamidomethyl:<br>5, 6                    |
|        |              |      |       | 2 - 23    | 908.02  | 67.5  | M.TRFFCCGSYFP<br>GYPSYGTNFHR.T           | Carbamidomethyl:<br>5, 6; Deamidated:<br>19 |
|        |              |      |       | 8 - 23    | 925.42  | 65.2  | C.GSYFPGYPSYG<br>TNFHR.T                 |                                             |
|        |              |      |       | 27 - 45   | 994.93  | 47.9  | R.ATPLNCVVPLGS<br>PLGYGCN.G              | Carbamidomethyl:<br>6, 18                   |
| KAP3.2 | gij229307    | 10.3 | 314.6 | 12 - 23   | 619.23  | 68.8  | R.TGPATTICSSDK.<br>F                     | Carbamidomethyl:<br>8                       |
|        |              |      |       | 27 - 37   | 644.28  | 50.7  | R.CGVCLPSTCPH.<br>N                      | Carbamidomethyl:<br>1, 4, 9                 |
|        |              |      |       | 12 - 24   | 692.85  | 64.4  | R.TGPATTICSSDK<br>F.C                    | Carbamidomethyl:<br>8                       |
|        |              |      |       | 12 - 26   | 850.86  | 94.3  | R.TGPATTICSSDK<br>FCR.C                  | Carbamidomethyl:<br>8, 14                   |
|        |              |      |       | 69 - 96   | 1023.47 | 36.4  | N.SSHPTPGLSGIN<br>LTTFIQPGCENVC<br>EPR.C | Carbamidomethyl:<br>21, 25                  |
| KAP1.4 | gij259221150 | 18.9 | 134   | 98 - 109  | 546.25  | 68.9  | Y.GQVGSSGAVSS<br>R.T                     |                                             |
|        |              |      |       | 91 - 109  | 898.88  | 42.1  | G.IGGSIDYGQVGS<br>SGAVSSR.T              |                                             |
| KAP6.1 | gij301171188 | 6.5  | 699.2 | 43 - 50   | 460.19  | 45    | G.CGYGYGSR.S                             | Carbamidomethyl:<br>1                       |

|                                    |              |       |        |                  |         |       |                               |                          |
|------------------------------------|--------------|-------|--------|------------------|---------|-------|-------------------------------|--------------------------|
|                                    |              |       |        | 22 - 36          | 566.29  | 25.3  | G.LGCGYGSCYGS<br>GFRR.L       | Carbamidomethyl:<br>3, 8 |
|                                    |              |       |        | 51 - 62          | 632.32  | 92.8  | R.SLCGSGYGYGS<br>R.S          | Carbamidomethyl:<br>3    |
|                                    |              |       |        | 37 - 48          | 642.24  | 50.8  | R.LGCGYGCGYGY<br>G.S          | Carbamidomethyl:<br>3, 7 |
|                                    |              |       |        | 39 - 50          | 678.74  | 76.7  | G.CGYGCGYGYG<br>SR.S          | Carbamidomethyl:<br>1, 5 |
|                                    |              |       |        | 71 - 83          | 719.28  | 46.1  | G.CGSGYGSFGY<br>YY.-          | Carbamidomethyl:<br>1    |
|                                    |              |       |        | 37 - 50          | 763.79  | 98.2  | R.LGCGYGCGYGY<br>GSR.S        | Carbamidomethyl:<br>3, 7 |
|                                    |              |       |        | 22 - 35          | 770.8   | 81.4  | G.LGCGYGSCYGS<br>GFR.R        | Carbamidomethyl:<br>3, 8 |
|                                    |              |       |        | 36 - 50          | 841.79  | 73.5  | R.RLGCGYCGYGY<br>YGSR.S       | Carbamidomethyl:<br>4, 8 |
|                                    |              |       |        | 63 - 83          | 1109.91 | 88.2  | R.SLCGSGYGCGS<br>GYGSGFGYYY.- | Carbamidomethyl:<br>3, 9 |
| PREDIC<br>TED:<br>desmogl<br>ein-4 | gij426253981 | 113.8 | 332.6  | 1,037 -<br>1,045 | 570.24  | 51.9  | R.YSNIHYSQQ.-                 |                          |
|                                    |              |       |        | 1,019 -<br>1,031 | 675.81  | 64    | R.ISQTSSTSPVTS<br>R.H         |                          |
|                                    |              |       |        | 123 - 133        | 712.92  | 58.1  | R.EITPLFLIYCR.A               | Carbamidomethyl:<br>10   |
|                                    |              |       |        | 774 - 792        | 1077.99 | 121.4 | R.DYGDTGLNLAF<br>LSYFSEK.A    |                          |
| PREDIC<br>TED:<br>K34              | gij426238003 | 46.6  | 6629.3 | 224 - 229        | 366.16  | 42.1  | R.VLNETR.A                    |                          |
|                                    |              |       |        | 136 - 142        | 412.21  | 62.1  | K.LASDDFR.T                   |                          |
|                                    |              |       |        | 67 - 73          | 412.24  | 59    | R.LASYLEK.V                   |                          |
|                                    |              |       |        | 192 - 202        | 442.91  | 71.7  | K.KNHEEEANSLR.<br>S           |                          |
|                                    |              |       |        | 203 - 210        | 451.77  | 30.7  | R.SQLGDRLN.V                  |                          |
|                                    |              |       |        | 185 - 191        | 452.73  | 35.1  | K.EELLCLK.K                   | Carbamidomethyl:<br>5    |
|                                    |              |       |        | 143 - 149        | 456.77  | 43.6  | R.TKYESER.S                   |                          |
|                                    |              |       |        | 80 - 87          | 474.21  | 51.3  | R.ENAELESR.I                  |                          |
|                                    |              |       |        | 358 - 366        | 482.26  | 41    | R.GLLDSEDSK.L                 |                          |
|                                    |              |       |        | 230 - 241        | 483.91  | 67.4  | R.AQYEALVETNR<br>R.D          |                          |
|                                    |              |       |        | 230 - 241        | 484.26  | 49    | R.AQYEALVETNR<br>R.D          | Deamidated: 2            |
|                                    |              |       |        | 80 - 91          | 486.94  | 40.3  | R.ENAELESRILER.<br>S          |                          |
|                                    |              |       |        | 109 - 116        | 494.74  | 62.4  | R.TIEELQQK.I                  |                          |
|                                    |              |       |        | 127 - 135        | 507.36  | 65.2  | R.LVIQIDNAK.L                 |                          |
|                                    |              |       |        | 59 - 66          | 512.78  | 29.9  | E.TMQFLNDR.L                  |                          |
|                                    |              |       |        | 59 - 66          | 520.79  | 47.5  | E.TMQFLNDR.L                  | Oxidation: 2             |
|                                    |              |       |        | 136 - 144        | 526.82  | 26.4  | K.LASDDFRTK.Y                 |                          |
|                                    |              |       |        | 101 - 108        | 537.81  | 50.6  | C.PNYQSYFR.T                  |                          |
|                                    |              |       |        | 67 - 75          | 539.83  | 76.2  | R.LASYLEKVR.Q                 |                          |
|                                    |              |       |        | 150 - 163        | 544     | 69.2  | R.SLRQLVESDINS<br>LR.R        |                          |
|                                    |              |       |        | 165 - 173        | 552.85  | 78.5  | R.ILDELTICK.S                 | Carbamidomethyl:<br>8    |
|                                    |              |       |        | 242 - 249        | 555.25  | 54.6  | R.DVEEWYIR.Q                  |                          |
|                                    |              |       |        | 349 - 357        | 562.76  | 65.1  | R.LESEINTYR.G                 |                          |
|                                    |              |       |        | 349 - 357        | 563.28  | 59.6  | R.LESEINTYR.G                 | Deamidated: 6            |

|  |  |  |  |           |        |       |                            |                           |
|--|--|--|--|-----------|--------|-------|----------------------------|---------------------------|
|  |  |  |  | 203 - 212 | 565.83 | 75.5  | R.SQLGDRLNVE.V             |                           |
|  |  |  |  | 108 - 116 | 572.81 | 46.6  | F.RTIEELQQK.I              |                           |
|  |  |  |  | 136 - 149 | 572.99 | 41.5  | K.LASDDFRTKYES<br>ER.S     |                           |
|  |  |  |  | 74 - 87   | 577.27 | 32.6  | K.VRQLERENAELE<br>SR.I     | Deamidated: 3             |
|  |  |  |  | 58 - 66   | 577.29 | 63.1  | K.ETMQFLNDR.L              |                           |
|  |  |  |  | 58 - 66   | 577.79 | 43.9  | K.ETMQFLNDR.L              | Deamidated: 4             |
|  |  |  |  | 58 - 66   | 585.22 | 58.7  | K.ETMQFLNDR.L              | Oxidation: 3              |
|  |  |  |  | 150 - 164 | 596.02 | 60.8  | R.SLRQLVESDINS<br>LRR.I    |                           |
|  |  |  |  | 193 - 202 | 599.75 | 54    | K.NHEEEANSLR.S             |                           |
|  |  |  |  | 193 - 202 | 600.26 | 46.4  | K.NHEEEANSLR.S             | Deamidated: 1             |
|  |  |  |  | 174 - 184 | 609.87 | 97.6  | K.SDLEAQVESLK.<br>E        |                           |
|  |  |  |  | 182 - 191 | 616.9  | 40.9  | E.SLKEELLCLK.K             | Carbamidomethyl:<br>8     |
|  |  |  |  | 164 - 173 | 630.91 | 40.3  | R.RILDELTLCK.S             | Carbamidomethyl:<br>9     |
|  |  |  |  | 241 - 249 | 633.28 | 53.4  | R.RDVEEWYIR.Q              |                           |
|  |  |  |  | 47 - 57   | 644.8  | 56.8  | W.FCEGSFNGNEK<br>.E        | Carbamidomethyl:<br>2     |
|  |  |  |  | 230 - 240 | 647.36 | 88.2  | R.AQYEALVETNR.<br>R        |                           |
|  |  |  |  | 92 - 102  | 650.33 | 45.9  | R.SQQQEPLVCPN.<br>Y        | Carbamidomethyl:<br>9     |
|  |  |  |  | 277 - 293 | 664.4  | 59.1  | R.RTVNALEVELQA<br>QHNL.R.D |                           |
|  |  |  |  | 224 - 240 | 669.35 | 64.4  | R.VLNETRAQYEAL<br>VETNR.R  |                           |
|  |  |  |  | 347 - 357 | 676.37 | 92.5  | K.ARLESEINTYR.G            |                           |
|  |  |  |  | 295 - 306 | 682.31 | 85.3  | D.SLENTLTETEAR.<br>Y       |                           |
|  |  |  |  | 358 - 370 | 687.84 | 51.6  | R.GLLDSEDSKLPS<br>N.P      |                           |
|  |  |  |  | 330 - 346 | 693.07 | 49.6  | R.SDLERQNQEYQ<br>VLLDVK.A  |                           |
|  |  |  |  | 56 - 66   | 705.85 | 53.4  | N.EKETMQFLNDR.<br>L        |                           |
|  |  |  |  | 109 - 126 | 716.39 | 64.3  | R.TIEELQQKILCAK<br>SENSR.L | Carbamidomethyl:<br>11    |
|  |  |  |  | 224 - 241 | 721.39 | 41.2  | R.VLNETRAQYEAL<br>VETNRR.D |                           |
|  |  |  |  | 229 - 240 | 725.38 | 63.2  | T.RAQYEALVETNR<br>.R       |                           |
|  |  |  |  | 230 - 241 | 725.86 | 35.9  | R.AQYEALVETNR<br>R.D       | Deamidated: 10            |
|  |  |  |  | 180 - 191 | 730.94 | 73.1  | Q.VESLKEELLCLK.<br>K       | Carbamidomethyl:<br>10    |
|  |  |  |  | 76 - 87   | 737.36 | 53.4  | R.QLERENAELES<br>R.I       |                           |
|  |  |  |  | 76 - 87   | 737.8  | 57.7  | R.QLERENAELES<br>R.I       | Deamidated: 1             |
|  |  |  |  | 58 - 75   | 738.4  | 85.8  | K.ETMQFLNDRLA<br>SYLEKVR.Q |                           |
|  |  |  |  | 294 - 306 | 739.86 | 110.7 | R.DSLENTLTETEA<br>R.Y      |                           |
|  |  |  |  | 294 - 306 | 740.35 | 84.4  | R.DSLENTLTETEA<br>R.Y      | Deamidated: 5             |
|  |  |  |  | 371 - 383 | 743.24 | 104.7 | N.PCATTNASSNF<br>CR.S      | Carbamidomethyl:<br>2, 12 |
|  |  |  |  | 58 - 75   | 743.73 | 32.9  | K.ETMQFLNDRLA<br>SYLEKVR.Q | Oxidation: 3              |

|  |  |  |  |           |        |       |                                        |                                               |
|--|--|--|--|-----------|--------|-------|----------------------------------------|-----------------------------------------------|
|  |  |  |  | 174 - 192 | 744.78 | 36.3  | K.SDLEAQVESLKE<br>ELLCLKK.N            | Carbamidomethyl:<br>16                        |
|  |  |  |  | 2 - 13    | 753.85 | 65.7  | M.SYSCCLPTLSYR<br>.S                   | Carbamidomethyl:<br>4, 5                      |
|  |  |  |  | 281 - 293 | 760.93 | 66.3  | N.ALEVELQAQHNL<br>R.D                  |                                               |
|  |  |  |  | 203 - 223 | 761.77 | 25.3  | R.SQLGDRLNVEV<br>DAAPTVDLNR.V          | Deamidated: 2                                 |
|  |  |  |  | 330 - 348 | 768.73 | 86.3  | R.SDLERQHQEYQ<br>VLLDVKAR.L            |                                               |
|  |  |  |  | 209 - 229 | 780.07 | 46.8  | R.LNVEVDAAPTVD<br>LNRVLNETR.A          |                                               |
|  |  |  |  | 109 - 121 | 787.45 | 73.6  | R.TIEELQQKILCAK<br>.S                  | Carbamidomethyl:<br>11                        |
|  |  |  |  | 54 - 66   | 791.34 | 57.9  | N.GNEKETMQFLN<br>DR.L                  |                                               |
|  |  |  |  | 122 - 135 | 793.91 | 53.2  | K.SENSRLVIQIDN<br>AK.L                 |                                               |
|  |  |  |  | 122 - 142 | 798.06 | 35.4  | K.SENSRLVIQIDN<br>AKLASDDFR.T          | Deamidated: 12                                |
|  |  |  |  | 209 - 223 | 813.43 | 102.5 | R.LNVEVDAAPTVD<br>LNR.V                |                                               |
|  |  |  |  | 257 - 277 | 821.78 | 44.7  | K.QVVSSEQLQS<br>YQAEIILRR.T            |                                               |
|  |  |  |  | 215 - 229 | 834.92 | 43.4  | D.AAPTVDLNRVLN<br>ETR.A                |                                               |
|  |  |  |  | 230 - 249 | 847.4  | 25.5  | R.AQYEALVETNR<br>RDVEEWYIR.Q           |                                               |
|  |  |  |  | 335 - 348 | 852.44 | 56.5  | R.QNQEYQVLLDV<br>KAR.L                 |                                               |
|  |  |  |  | 74 - 87   | 864.89 | 63.8  | K.VRQLERENAELE<br>SR.I                 |                                               |
|  |  |  |  | 88 - 108  | 885.73 | 69.3  | R.ILERSQQQEPLV<br>CPNYQSYFR.T          | Carbamidomethyl:<br>13                        |
|  |  |  |  | 127 - 142 | 909.47 | 98.3  | R.LVIQIDNAKLASD<br>DFR.T               |                                               |
|  |  |  |  | 59 - 73   | 914.97 | 89.7  | E.TMQFLNDRLAS<br>YLEK.V                |                                               |
|  |  |  |  | 58 - 72   | 915.42 | 54.1  | K.ETMQFLNDRLA<br>SYLE.K                |                                               |
|  |  |  |  | 278 - 293 | 917.99 | 119.9 | R.TVNALEVELQAA<br>HNLR.D               |                                               |
|  |  |  |  | 278 - 293 | 918.46 | 65    | R.TVNALEVELQAA<br>HNLR.D               | Deamidated: 3                                 |
|  |  |  |  | 278 - 293 | 918.47 | 86.3  | R.TVNALEVELQAA<br>HNLR.D               | Deamidated: 10                                |
|  |  |  |  | 270 - 293 | 939.52 | 63    | Q.AEIIELRRTVNAL<br>EVELQAQHNL.R.D      | Deamidated: 11                                |
|  |  |  |  | 358 - 383 | 947.74 | 76    | R.GLLDSEDSKLPS<br>NPCATTNASSNFC<br>R.S | Carbamidomethyl:<br>15, 25                    |
|  |  |  |  | 358 - 383 | 948.09 | 92    | R.GLLDSEDSKLPS<br>NPCATTNASSNFC<br>R.S | Carbamidomethyl:<br>15, 25;<br>Deamidated: 19 |
|  |  |  |  | 367 - 383 | 948.85 | 128   | K.LPSNPCATTNAS<br>SNFCR.S              | Carbamidomethyl:<br>6, 16                     |
|  |  |  |  | 242 - 256 | 976.47 | 63.8  | R.DVEEWYIRQTE<br>ELNK.Q                |                                               |
|  |  |  |  | 58 - 73   | 979.47 | 57.9  | K.ETMQFLNDRLA<br>SYLEK.V               |                                               |
|  |  |  |  | 58 - 73   | 979.98 | 64.9  | K.ETMQFLNDRLA<br>SYLEK.V               | Deamidated: 7                                 |
|  |  |  |  | 58 - 73   | 987.46 | 36.8  | K.ETMQFLNDRLA<br>SYLEK.V               | Oxidation: 3                                  |
|  |  |  |  | 165 - 181 | 988.5  | 46.1  | R.ILDELTLCKSDLE                        | Carbamidomethyl:                              |

|                            |              |      |       |           |         |       |                                           |                                              |
|----------------------------|--------------|------|-------|-----------|---------|-------|-------------------------------------------|----------------------------------------------|
|                            |              |      |       |           |         |       | AQVE.S                                    | 8                                            |
|                            |              |      |       | 203 - 229 | 998.85  | 36    | R.SQLGDRLNVEV<br>DAAPTVDLNRVLN<br>ETR.A   |                                              |
|                            |              |      |       | 174 - 191 | 1052.61 | 104.4 | K.SDLEAQVESLKE<br>ELLCLK.K                | Carbamidomethyl:<br>16                       |
|                            |              |      |       | 165 - 191 | 1064.23 | 28    | R.ILDELTLCSDLE<br>AQVESLKEELLCL<br>K.K    | Carbamidomethyl:<br>8, 25;<br>Deamidated: 15 |
|                            |              |      |       | 29 - 57   | 1067.79 | 46.2  | G.TTLPGACNIPAN<br>VGSCNWFCEGSF<br>NGNEK.E | Carbamidomethyl:<br>7, 16, 20                |
|                            |              |      |       | 92 - 108  | 1072.47 | 86.4  | R.SQQQEPLVCPN<br>YQSYFR.T                 | Carbamidomethyl:<br>9                        |
|                            |              |      |       | 92 - 108  | 1072.97 | 60.2  | R.SQQQEPLVCPN<br>YQSYFR.T                 | Carbamidomethyl:<br>9; Deamidated: 4         |
|                            |              |      |       | 278 - 306 | 1099.23 | 38.1  | R.TVNALEVELQAQ<br>HNLRDSLENTLTE<br>TEAR.Y | Deamidated: 12                               |
|                            |              |      |       | 203 - 223 | 1141.56 | 82.6  | R.SQLGDRLNVEV<br>DAAPTVDLNR.V             |                                              |
|                            |              |      |       | 203 - 223 | 1142.06 | 34    | R.SQLGDRLNVEV<br>DAAPTVDLNR.V             | Deamidated: 20                               |
| PREDIC<br>TED:<br>K32      | gij426238005 | 46   | 1074  | 133 - 139 | 404.2   | 53.7  | K.LAADDFR.S                               |                                              |
|                            |              |      |       | 142 - 149 | 490.76  | 56.6  | K.YETELGLR.Q                              |                                              |
|                            |              |      |       | 106 - 113 | 494.74  | 62.4  | K.TIEELQQK.I                              |                                              |
|                            |              |      |       | 355 - 363 | 518.78  | 43.6  | R.GLLDSEDCK.L                             | Carbamidomethyl:<br>8                        |
|                            |              |      |       | 162 - 170 | 552.85  | 78.5  | R.ILDELTLC.A                              | Carbamidomethyl:<br>8                        |
|                            |              |      |       | 55 - 63   | 554.34  | 50.6  | K.ETLQFLNSR.L                             |                                              |
|                            |              |      |       | 346 - 354 | 554.85  | 53.6  | R.LEAEINTYR.G                             |                                              |
|                            |              |      |       | 71 - 83   | 557.31  | 29    | R.VRQLERENVEL<br>ER.R                     |                                              |
|                            |              |      |       | 388 - 401 | 570.54  | 33    | R.TVCVPCVPCHP<br>SCH.-                    | Carbamidomethyl:<br>3, 6, 9, 13              |
|                            |              |      |       | 140 - 149 | 598.35  | 62.7  | R.SKYETELGLR.Q                            |                                              |
|                            |              |      |       | 161 - 170 | 630.91  | 40.3  | R.RILDELTLC.A                             | Carbamidomethyl:<br>9                        |
|                            |              |      |       | 344 - 354 | 668.33  | 67    | R.ARLEAEINTYR.G<br>D.SLENTLTETEAR.<br>Y   |                                              |
|                            |              |      |       | 292 - 303 | 682.31  | 85.3  | R.DSLENTLTETEA<br>R.Y                     |                                              |
|                            |              |      |       | 291 - 303 | 739.86  | 110.7 | R.DSLENTLTETEA<br>R.Y                     | Deamidated: 5                                |
|                            |              |      |       | 332 - 343 | 766.93  | 42.2  | R.QNQEYRVLLDV<br>R.A                      |                                              |
|                            |              |      |       | 275 - 290 | 941.99  | 55.5  | R.TVDTLEIELQTQ<br>HSLR.D                  |                                              |
| PREDIC<br>TED:<br>K18-like | gij426246505 | 47.9 | 386.7 | 158 - 164 | 404.2   | 53.7  | R.LAADDFR.V                               |                                              |
|                            |              |      |       | 276 - 284 | 447.71  | 31    | K.ESTAAVTSQ.N                             | Deamidated: 9                                |
|                            |              |      |       | 372 - 380 | 554.85  | 53.6  | K.LEAEINTYR.R                             |                                              |
|                            |              |      |       | 370 - 380 | 668.33  | 67    | T.VKLEAEINTYR.R                           |                                              |
|                            |              |      |       | 276 - 290 | 724.87  | 56    | K.ESTAAVTSQNAE<br>IGA.A                   |                                              |
|                            |              |      |       | 276 - 290 | 725.38  | 65.6  | K.ESTAAVTSQNAE<br>IGA.A                   | Deamidated: 9                                |
|                            |              |      |       | 149 - 164 | 916     | 33    | R.IVLQIDNARLAAD                           | Deamidated: 7                                |

|                   |              |      |        |           |        |       |                            |                                    |
|-------------------|--------------|------|--------|-----------|--------|-------|----------------------------|------------------------------------|
|                   |              |      |        |           |        |       | DFR.V                      |                                    |
| PREDICTED:<br>K39 | gij426239024 | 56.9 | 457.7  | 128 - 133 | 388.25 | 47.5  | K.VQMLER.E                 |                                    |
|                   |              |      |        | 121 - 127 | 426.24 | 45.5  | R.LANYLEK.V                | Deamidated: 3                      |
|                   |              |      |        | 239 - 245 | 452.73 | 35.1  | K.EELLCLK.N                | Carbamidomethyl: 5                 |
|                   |              |      |        | 163 - 170 | 494.74 | 62.4  | A.TIEELQQK.I               |                                    |
|                   |              |      |        | 236 - 245 | 616.9  | 40.9  | Q.SLKEELLCLK.N             | Carbamidomethyl: 8                 |
|                   |              |      |        | 234 - 245 | 730.94 | 73.1  | Q.VQSLKEELLCLK.N           | Carbamidomethyl: 10; Deamidated: 2 |
|                   |              |      |        | 348 - 360 | 755.32 | 70    | R.DSQECALTETEA<br>R.Y      | Carbamidomethyl: 5                 |
| PREDICTED:<br>K40 | gij426237961 | 47.4 | 1402.2 | 169 - 175 | 404.2  | 53.7  | K.LAADDFR.S                |                                    |
|                   |              |      |        | 100 - 106 | 412.24 | 59    | R.LASYLEK.V                |                                    |
|                   |              |      |        | 92 - 99   | 512.78 | 29.9  | E.TMQFLNDR.L               |                                    |
|                   |              |      |        | 92 - 99   | 520.79 | 47.5  | E.TMQFLNDR.L               | Oxidation: 2                       |
|                   |              |      |        | 160 - 168 | 530.81 | 62.6  | R.LAVQLDNCK.L              | Carbamidomethyl: 8                 |
|                   |              |      |        | 100 - 108 | 539.83 | 76.2  | R.LASYLEKVR.G              |                                    |
|                   |              |      |        | 91 - 99   | 577.29 | 63.1  | K.ETMQFLNDR.L              |                                    |
|                   |              |      |        | 91 - 99   | 577.79 | 43.9  | K.ETMQFLNDR.L              | Deamidated: 4                      |
|                   |              |      |        | 91 - 99   | 585.22 | 58.7  | K.ETMQFLNDR.L              | Oxidation: 3                       |
|                   |              |      |        | 382 - 390 | 599.3  | 75.6  | R.LECEINTYR.G              | Carbamidomethyl: 3                 |
|                   |              |      |        | 226 - 235 | 606.31 | 55.3  | K.SHEEEVNVLR.G             |                                    |
|                   |              |      |        | 176 - 185 | 606.34 | 66.3  | R.SKYESELSLR.Q             |                                    |
|                   |              |      |        | 89 - 99   | 705.85 | 53.4  | N.EKETMQFLNDR.<br>L        |                                    |
|                   |              |      |        | 380 - 390 | 712.84 | 60.4  | K.ARLECEINTYR.G            | Carbamidomethyl: 5                 |
|                   |              |      |        | 91 - 108  | 738.4  | 85.8  | K.ETMQFLNDRLA<br>SYLEKVR.G |                                    |
|                   |              |      |        | 91 - 108  | 743.73 | 32.9  | K.ETMQFLNDRLA<br>SYLEKVR.G | Oxidation: 3                       |
|                   |              |      |        | 92 - 106  | 914.97 | 89.7  | E.TMQFLNDRLAS<br>YLEK.V    |                                    |
|                   |              |      |        | 91 - 105  | 915.42 | 54.1  | K.ETMQFLNDRLA<br>SYLEK     |                                    |
|                   |              |      |        | 91 - 106  | 979.47 | 57.9  | K.ETMQFLNDRLA<br>SYLEK.V   |                                    |
|                   |              |      |        | 91 - 106  | 979.98 | 64.9  | K.ETMQFLNDRLA<br>SYLEK.V   | Deamidated: 7                      |
|                   |              |      |        | 91 - 106  | 987.46 | 36.8  | K.ETMQFLNDRLA<br>SYLEK.V   | Oxidation: 3                       |
| PREDICTED:<br>K84 | gij426224440 | 64.1 | 604.6  | 177 - 183 | 453.75 | 35.3  | R.FLEQQNK.L                |                                    |
|                   |              |      |        | 175 - 188 | 582.65 | 27.6  | K.VRFLEQQNKLL<br>TK.W      |                                    |
|                   |              |      |        | 54 - 64   | 598.84 | 64.8  | R.SVISFGSCSPR.I            | Carbamidomethyl: 8                 |
|                   |              |      |        | 530 - 542 | 629.88 | 110.2 | R.VVGGDLLGVG<br>CR.G       | Carbamidomethyl: 12                |
|                   |              |      |        | 319 - 330 | 643.41 | 87.5  | R.DLNVDGIIADIK.A           |                                    |
|                   |              |      |        | 41 - 53   | 662.85 | 39.6  | S.GPSFRGLSGFG<br>SR.S      |                                    |
|                   |              |      |        | 177 - 188 | 745.9  | 62.8  | R.FLEQQNKLL<br>ETK.W       |                                    |

|                            |              |      |        |           |        |      |                            |                                         |
|----------------------------|--------------|------|--------|-----------|--------|------|----------------------------|-----------------------------------------|
|                            |              |      |        | 177 - 188 | 746.4  | 57.5 | R.FLEQQNKLLETK<br>.W       | Deamidated: 6                           |
| PREDIC<br>TED:<br>K85-like | gij426226634 | 56.3 | 2463.3 | 149 - 155 | 406.2  | 52.8 | R.FAAFIDK.V                |                                         |
|                            |              |      |        | 158 - 164 | 453.75 | 35.3 | R.FLEQQNK.L                |                                         |
|                            |              |      |        | 72 - 80   | 473.74 | 55.5 | R.SLCAVGSPR.I              | Carbamidomethyl:<br>3                   |
|                            |              |      |        | 170 - 176 | 484.78 | 49.4 | K.LQFYQNR.Q                |                                         |
|                            |              |      |        | 170 - 176 | 485.29 | 39.8 | K.LQFYQNR.Q                | Deamidated: 6                           |
|                            |              |      |        | 364 - 372 | 487.78 | 54.2 | R.LTAEVENAK.Q              |                                         |
|                            |              |      |        | 144 - 155 | 490.26 | 48.4 | K.CLNNRFAAFIDK.<br>V       | Carbamidomethyl:<br>1                   |
|                            |              |      |        | 360 - 372 | 490.94 | 57.7 | R.VIQRLTAEVENA<br>K.Q      |                                         |
|                            |              |      |        | 352 - 363 | 504.93 | 31.9 | K.EEINELNRVIQR.<br>L       |                                         |
|                            |              |      |        | 246 - 253 | 507.27 | 41.2 | K.DTDCAYLR.K               | Carbamidomethyl:<br>4                   |
|                            |              |      |        | 352 - 359 | 508.75 | 40.7 | K.EEINELNR.V               |                                         |
|                            |              |      |        | 149 - 157 | 533.78 | 70   | R.FAAFIDKVR.F              |                                         |
|                            |              |      |        | 394 - 403 | 550.36 | 85.8 | K.LVGLLEEALQK.A            |                                         |
|                            |              |      |        | 414 - 422 | 564.25 | 51.7 | K.EYQEVMSK.L               |                                         |
|                            |              |      |        | 144 - 157 | 575.66 | 44.3 | K.CLNNRFAAFIDK<br>VR.F     | Carbamidomethyl:<br>1; Deamidated: 3    |
|                            |              |      |        | 350 - 363 | 581.36 | 57.6 | R.TKEEINELNRVIQ<br>R.L     |                                         |
|                            |              |      |        | 350 - 363 | 581.67 | 50   | R.TKEEINELNRVIQ<br>R.L     | Deamidated: 6                           |
|                            |              |      |        | 156 - 169 | 582.65 | 27.6 | K.VRFLEQQNKLLE<br>TK.L     |                                         |
|                            |              |      |        | 404 - 413 | 589.31 | 71.3 | K.AKQDMACLLK.E             | Carbamidomethyl:<br>7                   |
|                            |              |      |        | 47 - 58   | 592.79 | 45.2 | F.ANGLAFHGGSP<br>R.G       | Deamidated: 2                           |
|                            |              |      |        | 81 - 90   | 596.36 | 60.8 | R.ISVSYAWPLR.G             |                                         |
|                            |              |      |        | 393 - 403 | 614.35 | 37.3 | C.KLVGLEEALQK.<br>A        |                                         |
|                            |              |      |        | 350 - 359 | 623.33 | 85.6 | R.TKEEINELNR.V             |                                         |
|                            |              |      |        | 300 - 311 | 674.39 | 63.1 | R.ELNMDSVVAEIK<br>.A       |                                         |
|                            |              |      |        | 423 - 434 | 689.43 | 60   | K.LGLDVEIATYRK.<br>L       |                                         |
|                            |              |      |        | 392 - 403 | 694.41 | 82.2 | K.CKLVGLEEALQK<br>.A       | Carbamidomethyl:<br>1                   |
|                            |              |      |        | 45 - 58   | 694.85 | 97.8 | R.GFANGLAFHGG<br>SPR.G     | Deamidated: 4                           |
|                            |              |      |        | 406 - 422 | 696.37 | 30.4 | K.QDMACLLKEYQ<br>EVMNSK.L  | Carbamidomethyl:<br>5                   |
|                            |              |      |        | 349 - 359 | 701.36 | 63.2 | R.RTKEEINELNR.V            |                                         |
|                            |              |      |        | 158 - 169 | 745.9  | 62.8 | R.FLEQQNKLLETK<br>.L       |                                         |
|                            |              |      |        | 158 - 169 | 746.4  | 57.5 | R.FLEQQNKLLETK<br>.L       | Deamidated: 6                           |
|                            |              |      |        | 404 - 422 | 762.68 | 55.4 | K.AKQDMACLLKE<br>YQEVMSK.L | Carbamidomethyl:<br>7                   |
|                            |              |      |        | 404 - 422 | 768.04 | 42.5 | K.AKQDMACLLKE<br>YQEVMSK.L | Carbamidomethyl:<br>7; Oxidation: 16    |
|                            |              |      |        | 404 - 422 | 773.37 | 34.6 | K.AKQDMACLLKE<br>YQEVMSK.L | Carbamidomethyl:<br>7; Oxidation: 5, 16 |
|                            |              |      |        | 165 - 176 | 776.94 | 80.9 | K.LLETKLQFYQNR<br>.Q       |                                         |

|                       |              |    |        |           |        |       |                                      |                                             |
|-----------------------|--------------|----|--------|-----------|--------|-------|--------------------------------------|---------------------------------------------|
|                       |              |    |        | 178 - 196 | 791.08 | 55.4  | Q.CCESNLEPLFN<br>GYIETLRR.E          | Carbamidomethyl:<br>1, 2                    |
|                       |              |    |        | 457 - 472 | 801.87 | 110.4 | R.SQGGVICGDLG<br>STVPR.G             | Carbamidomethyl:<br>7                       |
|                       |              |    |        | 30 - 44   | 803.39 | 79.1  | R.DFSSCSAVVPK<br>PGVR.G              | Carbamidomethyl:<br>5                       |
|                       |              |    |        | 158 - 176 | 814.09 | 71    | R.FLEQQNKLLETK<br>LQFYQNR.Q          |                                             |
| PREDIC<br>TED:<br>K86 | gjl426224446 | 52 | 2393.7 | 35 - 40   | 371.13 | 27.2  | R.GVSCYR.G                           | Carbamidomethyl:<br>4                       |
|                       |              |    |        | 115 - 121 | 406.2  | 52.8  | K.FAAFIDK.V                          |                                             |
|                       |              |    |        | 463 - 471 | 445.73 | 98.3  | R.VGGSILGCK.K                        | Carbamidomethyl:<br>8                       |
|                       |              |    |        | 124 - 130 | 453.75 | 35.3  | R.FLEQQNK.L                          |                                             |
|                       |              |    |        | 395 - 406 | 473.93 | 60.9  | K.LGLDIEIATYRR.L                     |                                             |
|                       |              |    |        | 240 - 246 | 476.25 | 53.8  | T.LYEEELR.V                          |                                             |
|                       |              |    |        | 407 - 414 | 487.22 | 73.6  | R.LLEGEEQR.L                         |                                             |
|                       |              |    |        | 287 - 298 | 490.58 | 47.6  | R.SRAEASWYRS<br>K.Y                  |                                             |
|                       |              |    |        | 330 - 338 | 494.82 | 65.5  | R.LTAEIENAK.S                        |                                             |
|                       |              |    |        | 289 - 296 | 506.22 | 60.9  | R.AEAESWYR.S                         |                                             |
|                       |              |    |        | 318 - 325 | 508.75 | 40.7  | K.EEINELNR.L                         |                                             |
|                       |              |    |        | 463 - 472 | 509.76 | 44.8  | R.VGGSILGCKK.C                       | Carbamidomethyl:<br>8                       |
|                       |              |    |        | 115 - 123 | 533.78 | 70    | K.FAAFIDKVR.F                        |                                             |
|                       |              |    |        | 407 - 415 | 543.8  | 53.2  | R.LLEGEEQRL.C                        |                                             |
|                       |              |    |        | 26 - 34   | 549.28 | 45.2  | R.CCVTAAPYR.G                        | Carbamidomethyl:<br>1, 2                    |
|                       |              |    |        | 406 - 414 | 565.27 | 54.6  | R.RLLEGEEQR.L                        |                                             |
|                       |              |    |        | 122 - 135 | 582.65 | 27.6  | K.VRFLEQQNKLLE<br>TK.W               |                                             |
|                       |              |    |        | 289 - 298 | 613.77 | 54.7  | R.AEAESWYRSK.Y                       |                                             |
|                       |              |    |        | 406 - 415 | 621.87 | 37.2  | R.RLLEGEEQRL.C                       |                                             |
|                       |              |    |        | 316 - 325 | 623.33 | 85.6  | R.TKEEINELNR.L                       |                                             |
|                       |              |    |        | 287 - 296 | 627.84 | 69.5  | R.SRAEASWYR.S                        |                                             |
|                       |              |    |        | 395 - 405 | 632.39 | 96.6  | K.LGLDIEIATYR.R                      |                                             |
|                       |              |    |        | 174 - 190 | 653.06 | 35.8  | R.LASELNHVQEV<br>EGYKK.K             |                                             |
|                       |              |    |        | 174 - 190 | 653.38 | 26.8  | R.LASELNHVQEV<br>EGYKK.K             | Deamidated: 6                               |
|                       |              |    |        | 315 - 325 | 701.36 | 63.2  | R.RTKKEINELNR.L                      |                                             |
|                       |              |    |        | 266 - 277 | 706.38 | 51.7  | R.YLNMDSSIVAEIK.<br>A                | Oxidation: 4                                |
|                       |              |    |        | 124 - 135 | 745.9  | 62.8  | R.FLEQQNKLLETK<br>.W                 |                                             |
|                       |              |    |        | 124 - 135 | 746.4  | 57.5  | R.FLEQQNKLLETK<br>.W                 | Deamidated: 6                               |
|                       |              |    |        | 247 - 260 | 755.5  | 79.2  | R.VIAHISDTSVIV<br>K.M                |                                             |
|                       |              |    |        | 240 - 260 | 814.79 | 54.3  | T.LYEEELRVIQAH<br>SDTSVIVK.M         |                                             |
|                       |              |    |        | 415 - 430 | 847.39 | 132.1 | R.LCEGVGAVNVC<br>VSSSR.G             | Carbamidomethyl:<br>2, 11                   |
|                       |              |    |        | 415 - 430 | 847.96 | 34.7  | R.LCEGVGAVNVC<br>VSSSR.G             | Carbamidomethyl:<br>2, 11;<br>Deamidated: 9 |
|                       |              |    |        | 407 - 430 | 883.4  | 57.5  | R.LLEGEEQRLCE<br>GVGAVNVCVSSS<br>R.G | Carbamidomethyl:<br>10, 19                  |
|                       |              |    |        | 174 - 189 | 914.99 | 94.4  | R.LASELNHVQEV                        |                                             |

|                                     |              |      |       |           |         |       |                           |                                             |
|-------------------------------------|--------------|------|-------|-----------|---------|-------|---------------------------|---------------------------------------------|
|                                     |              |      |       |           |         |       | EGYK.K                    |                                             |
| PREDICTED:<br>KAP13-1-like          | gij426217167 | 17.5 | 685   | 14 - 20   | 434.75  | 42.2  | R.SLQDHLR.Y               |                                             |
|                                     |              |      |       | 34 - 40   | 434.75  | 42.2  | R.SLQDHLR.T               |                                             |
|                                     |              |      |       | 34 - 40   | 435.27  | 52.9  | R.SLQDHLR.T               | Deamidated: 3                               |
|                                     |              |      |       | 14 - 20   | 435.27  | 52.9  | R.SLQDHLR.Y               | Deamidated: 3                               |
|                                     |              |      |       | 149 - 158 | 526.28  | 47.6  | R.SGQSLSFQPT.C            |                                             |
|                                     |              |      |       | 128 - 137 | 551.72  | 60.9  | R.SCYSVGCGR.G             | Carbamidomethyl: 2, 7                       |
|                                     |              |      |       | 137 - 145 | 576.32  | 40.6  | R.SSFYRPTFF.S             |                                             |
|                                     |              |      |       | 116 - 127 | 601.29  | 86.8  | R.SSSCSSLSSGS.R.S         | Carbamidomethyl: 4                          |
|                                     |              |      |       | 137 - 146 | 619.83  | 32.2  | R.SSFYRPTFFS.S            |                                             |
|                                     |              |      |       | 81 - 91   | 638.81  | 40.8  | R.TSTFFSPCQTT.C           | Carbamidomethyl: 8                          |
|                                     |              |      |       | 64 - 75   | 647.81  | 53.9  | R.TQTVVSSPCQT.S.C         | Carbamidomethyl: 9                          |
|                                     |              |      |       | 64 - 80   | 676.27  | 27.3  | R.TQTVVSSPCQT.SCYRPR.T    | Carbamidomethyl: 9, 13                      |
|                                     |              |      |       | 64 - 80   | 676.64  | 26.6  | R.TQTVVSSPCQT.SCYRPR.T    | Carbamidomethyl: 9, 13; Deamidated: 10      |
|                                     |              |      |       | 149 - 162 | 706.8   | 42.8  | R.SGQSLSFQPTC.GSG.F       | Carbamidomethyl: 11                         |
|                                     |              |      |       | 137 - 148 | 741.34  | 41    | R.SSFYRPTFFSSR.S          |                                             |
|                                     |              |      |       | 149 - 164 | 861.91  | 104.7 | R.SGQSLSFQPTC.GSGFY.-     | Carbamidomethyl: 11                         |
|                                     |              |      |       | 149 - 164 | 862.36  | 87.2  | R.SGQSLSFQPTC.GSGFY.-     | Carbamidomethyl: 11; Deamidated: 3          |
|                                     |              |      |       | 168 - 183 | 964.38  | 41.2  | R.SCPSSCYRPTC.GSVFY.-     | Carbamidomethyl: 2, 6, 11                   |
|                                     |              |      |       | 97 - 115  | 1054.47 | 99    | R.TSTFSSPCQTTF.PGSLAYR.S  | Carbamidomethyl: 8                          |
| PREDICTED:<br>KAP16-1-like          | gij426239028 | 82.3 | 122.9 | 27 - 36   | 566.73  | 42.8  | R.GPVCLPSSCR.S            | Carbamidomethyl: 4, 9                       |
|                                     |              |      |       | 382 - 401 | 1145.96 | 80.1  | K.ATICESACPVSS.CAQPVYYK.A | Carbamidomethyl: 4, 8, 13                   |
| PREDICTED:<br>KAP4-8-like isoform 2 | gij426237981 | 20.4 | 246.6 | 99 - 110  | 770.26  | 29.3  | C.CQSVCCQPSCP.R.I         | Carbamidomethyl: 1, 5, 6, 10; Deamidated: 2 |
|                                     |              |      |       | 4 - 17    | 810.23  | 64.9  | S.SCCGSVCSDQS.CGR.S       | Carbamidomethyl: 2, 3, 7, 12                |
|                                     |              |      |       | 98 - 110  | 849.75  | 82.6  | R.CCQSVCCQPSCP.R.I        | Carbamidomethyl: 1, 2, 6, 7, 11             |
|                                     |              |      |       | 3 - 17    | 853.76  | 69.8  | V.SSCCGSVCSQDQ.SCGR.S     | Carbamidomethyl: 3, 4, 8, 13                |
| PREDICTED:<br>plakophilin-3         | gij426252688 | 76.9 | 105   | 189 - 204 | 710.86  | 61.2  | R.GVAGGGPGGIP.EPVTR.A     |                                             |
|                                     |              |      |       | 210 - 223 | 742.91  | 26.7  | R.SLSLGDGSHLP.DMR.G       |                                             |
| KAP3.4                              | gij125662    | 10.5 | 120.7 | 27 - 37   | 644.28  | 50.7  | R.CGVCLPSTCPH.T           | Carbamidomethyl: 1, 4, 9                    |
|                                     |              |      |       | 6 - 23    | 992.42  | 70.1  | R.LCCSVPTSPATT.ICSSDK.F   | Carbamidomethyl: 2, 3, 14                   |
| KAP2.3                              | gij125644    | 14.2 | 359.5 | 41 - 47   | 408.25  | 47.2  | R.PVTFVPR.C               |                                             |

|     |           |      |        |           |         |       |                                    |                                                        |
|-----|-----------|------|--------|-----------|---------|-------|------------------------------------|--------------------------------------------------------|
|     |           |      |        | 124 - 131 | 514.7   | 36.1  | R.TFRTSPCC.-                       | Carbamidomethyl:<br>7, 8                               |
|     |           |      |        | 48 - 56   | 596.79  | 35.4  | R.CTRPICEPC.R                      | Carbamidomethyl:<br>1, 6, 9                            |
|     |           |      |        | 48 - 57   | 674.77  | 33.9  | R.CTRPICEPCR.R                     | Carbamidomethyl:<br>1, 6, 9                            |
|     |           |      |        | 58 - 76   | 789.29  | 28.8  | R.RPVCCDPCSLQ<br>EGCCRPIT.C        | Carbamidomethyl:<br>4, 5, 8, 14, 15;<br>Deamidated: 11 |
|     |           |      |        | 58 - 71   | 869.32  | 55.4  | R.RPVCCDPCSLQ<br>EGC.C             | Carbamidomethyl:<br>4, 5, 8, 14                        |
|     |           |      |        | 1 - 22    | 1173.51 | 122.8 | -<br>.TGSCCGPTFSSLS<br>CGGGCLQPR.Y | Carbamidomethyl:<br>4, 5, 14, 18                       |
| K85 | gij246276 | 56.3 | 6358.4 | 40 - 45   | 371.13  | 27.2  | R.GVSCYR.G                         | Carbamidomethyl:<br>4                                  |
|     |           |      |        | 133 - 139 | 406.2   | 52.8  | R.FAAFIDK.V                        |                                                        |
|     |           |      |        | 317 - 326 | 412.87  | 31.3  | K.CEEMKATVIR.H                     | Carbamidomethyl:<br>1                                  |
|     |           |      |        | 180 - 191 | 452.59  | 30.6  | R.REAEHVEADSG<br>R.L               |                                                        |
|     |           |      |        | 142 - 148 | 453.75  | 35.3  | R.FLEQQNK.L                        |                                                        |
|     |           |      |        | 413 - 424 | 473.93  | 60.9  | K.LGLDIEIATYRR.L                   |                                                        |
|     |           |      |        | 425 - 432 | 487.22  | 73.6  | R.LLEGEEQR.L                       |                                                        |
|     |           |      |        | 7 - 15    | 490.27  | 49.6  | R.ISPGYSVTR.T                      |                                                        |
|     |           |      |        | 305 - 316 | 490.58  | 47.6  | R.SRAEAEVWYRS<br>K.C               |                                                        |
|     |           |      |        | 348 - 356 | 494.82  | 65.5  | R.LTAEIENAK.C                      |                                                        |
|     |           |      |        | 210 - 217 | 504.78  | 64.6  | K.YEEEEVALR.A                      |                                                        |
|     |           |      |        | 336 - 347 | 504.93  | 31.9  | K.EEINELNRVIQR.<br>L               |                                                        |
|     |           |      |        | 307 - 314 | 506.22  | 60.9  | R.AEAEVWYR.S                       |                                                        |
|     |           |      |        | 230 - 237 | 506.24  | 47.7  | K.DVDCAYLR.K                       | Carbamidomethyl:<br>4                                  |
|     |           |      |        | 336 - 343 | 508.75  | 40.7  | K.EEINELNR.V                       |                                                        |
|     |           |      |        | 296 - 304 | 519.76  | 75    | K.AQYDDIASR.S                      |                                                        |
|     |           |      |        | 296 - 304 | 520.26  | 25.9  | K.AQYDDIASR.S                      | Deamidated: 2                                          |
|     |           |      |        | 489 - 498 | 523.18  | 66.5  | R.ASSFSCGSSR.S                     | Carbamidomethyl:<br>6                                  |
|     |           |      |        | 133 - 141 | 533.78  | 70    | R.FAAFIDKVR.F                      |                                                        |
|     |           |      |        | 384 - 393 | 536.29  | 87.2  | K.LAGLEEALQK.A                     |                                                        |
|     |           |      |        | 425 - 433 | 543.8   | 53.2  | R.LLEGEEQRL.C                      |                                                        |
|     |           |      |        | 54 - 64   | 545.8   | 80.4  | R.SVSALGSCGPR.<br>I                | Carbamidomethyl:<br>8                                  |
|     |           |      |        | 31 - 39   | 549.27  | 53.7  | R.CCISAAPYR.G                      | Carbamidomethyl:<br>1, 2                               |
|     |           |      |        | 404 - 412 | 564.25  | 51.7  | K.EYQEVMSK.L                       |                                                        |
|     |           |      |        | 424 - 432 | 565.27  | 54.6  | R.RLLEGEEQR.L                      |                                                        |
|     |           |      |        | 6 - 15    | 568.31  | 45.9  | Y.RISPGYSVTR.T                     |                                                        |
|     |           |      |        | 209 - 217 | 568.81  | 73.8  | K.KYEEEEVALR.A                     |                                                        |
|     |           |      |        | 230 - 238 | 570.28  | 47.7  | K.DVDCAYLRK.S                      | Carbamidomethyl:<br>4                                  |
|     |           |      |        | 229 - 237 | 570.31  | 68.3  | K.KDVDCAYLR.K                      | Carbamidomethyl:<br>5                                  |
|     |           |      |        | 16 - 26   | 577.75  | 73.3  | R.TFSSCSAVAPK.<br>T                | Carbamidomethyl:<br>5                                  |
|     |           |      |        | 334 - 347 | 581.36  | 57.6  | R.TKEEINELNRVIQ<br>R.L             |                                                        |
|     |           |      |        | 334 - 347 | 581.67  | 50    | R.TKEEINELNRVIQ<br>R.L             | Deamidated: 6                                          |
|     |           |      |        | 140 - 153 | 582.65  | 27.6  | K.VRFLEQQNKLLE                     |                                                        |

|  |  |  |  |           |        |       |                          |                                                 |
|--|--|--|--|-----------|--------|-------|--------------------------|-------------------------------------------------|
|  |  |  |  |           |        |       | TK.W                     |                                                 |
|  |  |  |  | 154 - 161 | 585.24 | 36    | K.WQFYQNQR.C             |                                                 |
|  |  |  |  | 154 - 161 | 585.74 | 52.9  | K.WQFYQNQR.C             | Deamidated: 6                                   |
|  |  |  |  | 394 - 403 | 589.31 | 71.3  | K.AKQDMACLLK.E           | Carbamidomethyl: 7                              |
|  |  |  |  | 181 - 191 | 600.24 | 77.6  | R.EAEHVEADSGR.L          |                                                 |
|  |  |  |  | 383 - 393 | 600.38 | 84.8  | S.KLAGLEELQK.A           |                                                 |
|  |  |  |  | 279 - 288 | 605.76 | 41.2  | K.MDNSRDNLMD.C           |                                                 |
|  |  |  |  | 218 - 228 | 610.88 | 60.6  | R.ATAENEFVVLK.K          |                                                 |
|  |  |  |  | 307 - 316 | 613.77 | 54.7  | R.AEAEWYRSK.C            |                                                 |
|  |  |  |  | 424 - 433 | 621.87 | 37.2  | R.RLLEGEELQK.C           |                                                 |
|  |  |  |  | 334 - 343 | 623.33 | 85.6  | R.TKEEINELNR.V           |                                                 |
|  |  |  |  | 305 - 314 | 627.84 | 69.5  | R.SRAEAEWYR.S            |                                                 |
|  |  |  |  | 413 - 423 | 632.39 | 96.6  | K.LGLDIEIATYR.R          |                                                 |
|  |  |  |  | 208 - 217 | 632.87 | 65    | K.KKYEEEEVALR.A          |                                                 |
|  |  |  |  | 384 - 395 | 635.89 | 76.4  | K.LAGLEELQKAK.Q          |                                                 |
|  |  |  |  | 296 - 306 | 641.34 | 39.8  | K.AQYDDIASRSR.A          |                                                 |
|  |  |  |  | 109 - 119 | 643.84 | 65    | N.LEIDPNAQCVK.H          | Carbamidomethyl: 9                              |
|  |  |  |  | 382 - 393 | 643.91 | 102.5 | R.SKLAGLEELQK.A          |                                                 |
|  |  |  |  | 192 - 208 | 653.38 | 26.8  | R.LASELDHVQEVL EGYKK.K   |                                                 |
|  |  |  |  | 279 - 295 | 670.69 | 63.3  | K.MDNSRDNLMD VVAEIK.A    | Carbamidomethyl: 11                             |
|  |  |  |  | 218 - 229 | 674.88 | 82    | R.ATAENEFVVLK.D          |                                                 |
|  |  |  |  | 4 - 15    | 693.3  | 79.2  | R.SYRISPGYSVTR.T         |                                                 |
|  |  |  |  | 396 - 412 | 696.37 | 30.4  | K.QDMACLLKEYQ EVMNSK.L   | Carbamidomethyl: 5                              |
|  |  |  |  | 333 - 343 | 701.36 | 63.2  | R.RTKEEINELNR.V          |                                                 |
|  |  |  |  | 284 - 295 | 703.87 | 87.8  | R.DLNMDCVVAEIK.A         | Carbamidomethyl: 6                              |
|  |  |  |  | 284 - 295 | 711.89 | 85.7  | R.DLNMDCVVAEIK.A         | Carbamidomethyl: 6; Oxidation: 4                |
|  |  |  |  | 284 - 295 | 712.27 | 32    | R.DLNMDCVVAEIK.A         | Carbamidomethyl: 6; Oxidation: 4; Deamidated: 3 |
|  |  |  |  | 348 - 359 | 716.85 | 95.5  | R.LTAEIENAKCQR.T         | Carbamidomethyl: 10                             |
|  |  |  |  | 450 - 464 | 728.83 | 75.5  | G.GVACGGLTYSS TAGR.Q     | Carbamidomethyl: 4                              |
|  |  |  |  | 344 - 356 | 742.89 | 71    | R.VIQRILTAEIENAK.C       |                                                 |
|  |  |  |  | 382 - 395 | 743.46 | 71.6  | R.SKLAGLEELQK AK.Q       |                                                 |
|  |  |  |  | 142 - 153 | 745.9  | 62.8  | R.FLEQQNKLLETK.W         |                                                 |
|  |  |  |  | 142 - 153 | 746.4  | 57.5  | R.FLEQQNKLLETK.W         | Deamidated: 6                                   |
|  |  |  |  | 384 - 403 | 749.43 | 37.7  | K.LAGLEELQKAK QDMACLLK.E | Carbamidomethyl: 17; Oxidation: 15              |
|  |  |  |  | 449 - 464 | 757.34 | 89.6  | R.GGVACGGLTYS STAGR.Q    | Carbamidomethyl: 5                              |
|  |  |  |  | 394 - 412 | 762.68 | 55.4  | K.AKQDMACLLKE YQEVMSK.L  | Carbamidomethyl: 7                              |

|  |  |  |  |           |         |       |                                  |                                         |
|--|--|--|--|-----------|---------|-------|----------------------------------|-----------------------------------------|
|  |  |  |  | 360 - 381 | 762.7   | 71.2  | R.TKLEAAVAEAEQ<br>QGAAALNDAR.S   | Deamidated: 12                          |
|  |  |  |  | 238 - 257 | 764.39  | 97.5  | R.KSDLEANVEALV<br>EESNFLKR.L     |                                         |
|  |  |  |  | 394 - 412 | 768.04  | 42.5  | K.AKQDMACLLKE<br>YQEVMSK.L       | Carbamidomethyl:<br>7; Oxidation: 16    |
|  |  |  |  | 394 - 412 | 773.37  | 34.6  | K.AKQDMACLLKE<br>YQEVMSK.L       | Carbamidomethyl:<br>7; Oxidation: 5, 16 |
|  |  |  |  | 161 - 179 | 791.05  | 60.2  | Q.RCCESNLEPLF<br>NGYIETLR.R      | Carbamidomethyl:<br>2, 3                |
|  |  |  |  | 162 - 180 | 791.08  | 55.4  | R.CCESNLEPLFN<br>GYIETLRR.E      | Carbamidomethyl:<br>1, 2                |
|  |  |  |  | 258 - 278 | 800.78  | 73.9  | R.LYDEEIQILNAHI<br>SDTSVIVK.M    |                                         |
|  |  |  |  | 258 - 278 | 801.13  | 55.4  | R.LYDEEIQILNAHI<br>SDTSVIVK.M    | Deamidated: 10                          |
|  |  |  |  | 284 - 304 | 809.43  | 83.4  | R.DLNMDCVVAEIK<br>AQYDDIASR.S    | Carbamidomethyl:<br>6                   |
|  |  |  |  | 284 - 304 | 814.73  | 77.1  | R.DLNMDCVVAEIK<br>AQYDDIASR.S    | Carbamidomethyl:<br>6; Oxidation: 4     |
|  |  |  |  | 433 - 448 | 855.39  | 122   | R.LCEGVGGSVNV<br>VSSSR.G         | Carbamidomethyl:<br>2, 11               |
|  |  |  |  | 149 - 161 | 877.43  | 87.5  | K.LLETKWQFYQN<br>QR.C            |                                         |
|  |  |  |  | 364 - 381 | 907.41  | 125.1 | E.AAVAEAEQQGE<br>AALNDAR.S       |                                         |
|  |  |  |  | 239 - 256 | 1004    | 111.9 | K.SDLEANVEALVE<br>ESNFLK.R       |                                         |
|  |  |  |  | 102 - 119 | 1013.02 | 82.8  | E.SLLTPLNLEIDPN<br>AQCVK.H       | Carbamidomethyl:<br>16                  |
|  |  |  |  | 362 - 381 | 1028.52 | 147.1 | K.LEAAVAEAEQQ<br>GAAALNDAR.S     |                                         |
|  |  |  |  | 362 - 381 | 1028.97 | 131.9 | K.LEAAVAEAEQQ<br>GAAALNDAR.S     | Deamidated: 17                          |
|  |  |  |  | 360 - 381 | 1143.03 | 151.1 | R.TKLEAAVAEAEQ<br>QGAAALNDAR.S   |                                         |
|  |  |  |  | 465 - 488 | 1191.59 | 103.9 | R.QIASGPVATGGS<br>ITVLAPDSCQPR.A | Carbamidomethyl:<br>21                  |
