# Supplementary material for: Ionic liquid-assisted extraction of wool keratin proteins as an aid to MS identification
Source: Royal Society of Chemistry journal article supplement (doi:10.1039/c4ay01251h), 2014-01-01
Supplement: c4ay01251h3.pdf [file c4ay01251h3.pdf]

**Supplementary Table 3. Proteins and peptides identified in Urea/thourea extract Fraction 3.**

| Protein   | Accession    | Mol Wgt (kDa) | Protein score          | Range                            | m/z meas. | Peptide score | Sequence            | Modifications                    |
|-----------|--------------|---------------|------------------------|----------------------------------|-----------|---------------|---------------------|----------------------------------|
| K86-like  | gil312283584 | 53.2          | 5486.2                 | 311 - 316                        | 356.72    | 38.1          | R.HGETLR.R          |                                  |
|           |              |               |                        | 34 - 39                          | 378.16    | 27.1          | R.GISCYR.G          | Carbamidomethyl: 4               |
|           |              |               |                        | 117 - 123                        | 406.27    | 47.9          | R.FAAFIDK.V         |                                  |
|           |              |               |                        | 40 - 48                          | 426.24    | 60            | R.GLTGGFGSR.S       |                                  |
|           |              |               |                        | 476 - 484                        | 445.74    | 98.4          | R.VGGSILGCK.K       | Carbamidomethyl: 8               |
|           |              |               |                        | 272 - 279                        | 451.28    | 48.4          | M.DNIVAEIK.A        |                                  |
|           |              |               |                        | 126 - 132                        | 453.78    | 42.3          | R.FLEQQNK.L         |                                  |
|           |              |               |                        | 397 - 408                        | 473.95    | 58.5          | K.LGLDIEIATYRR.L    |                                  |
|           |              |               |                        | 242 - 248                        | 476.27    | 49.4          | R.LYEEEEIR.V        |                                  |
|           |              |               |                        | 254 - 262                        | 481.28    | 75.2          | H.ISDTSVIVK.M       |                                  |
|           |              |               |                        | 138 - 144                        | 484.74    | 43.3          | K.LQFYQNR.Q         |                                  |
|           |              |               |                        | 138 - 144                        | 485.24    | 26.5          | K.LQFYQNR.Q         | Deamidated: 6                    |
|           |              |               |                        | 409 - 416                        | 487.25    | 73.4          | R.LLEGEEQR.L        |                                  |
|           |              |               |                        | 332 - 340                        | 487.76    | 52.8          | R.LTAEVENAK.C       |                                  |
|           |              |               |                        | 8 - 21                           | 493.59    | 28.2          | R.AVPAFSCVSACGPR.P  | Carbamidomethyl: 7, 11           |
|           |              |               |                        | 126 - 137                        | 497.6     | 34.2          | R.FLEQQNKLLLETK.L   |                                  |
|           |              |               |                        | 380 - 387                        | 497.75    | 62.4          | K.QDMACLK.E         | Carbamidomethyl: 5; Oxidation: 3 |
|           |              |               |                        | 214 - 221                        | 506.23    | 43.4          | K.DVDCAYLR.K        | Carbamidomethyl: 4               |
|           |              |               |                        | 291 - 298                        | 506.26    | 48.2          | R.AEAESWYR.S        |                                  |
|           |              |               |                        | 11 - 24                          | 507.89    | 38            | P.AFSCVSACGPRPG.R.C | Carbamidomethyl: 4, 8            |
|           |              |               |                        | 320 - 327                        | 508.76    | 36            | K.EEINELNR.V        |                                  |
|           |              |               |                        | 194 - 201                        | 511.78    | 62.3          | R.YEEEEIALR.A       |                                  |
|           |              |               |                        | 280 - 288                        | 524.22    | 73.7          | K.AHYDDIASR.S       |                                  |
|           |              |               |                        | 117 - 125                        | 533.82    | 69.7          | R.FAAFIDKVR.F       |                                  |
|           |              |               |                        | 368 - 377                        | 536.33    | 87.2          | K.LAGLEELQK.A       |                                  |
|           |              |               |                        | 409 - 417                        | 543.82    | 35.2          | R.LLEGEEQRL.C       |                                  |
|           |              |               |                        | 241 - 248                        | 554.31    | 49.8          | R.RLYEEEEIR.V       |                                  |
|           |              |               |                        | 25 - 33                          | 556.23    | 66.8          | R.CCITAAPYR.G       | Carbamidomethyl: 1, 2            |
| 388 - 396 | 564.27       | 39.2          | K.EYQEVMSK.L           |                                  |           |               |                     |                                  |
| 408 - 416 | 565.29       | 43            | R.RLLEGEEQR.L          |                                  |           |               |                     |                                  |
| 331 - 340 | 565.76       | 38.9          | Q.RLTAEVENAK.C         |                                  |           |               |                     |                                  |
| 213 - 221 | 570.29       | 72.5          | K.KDVDCAYLR.K          | Carbamidomethyl: 5               |           |               |                     |                                  |
| 378 - 387 | 589.3        | 63.3          | K.AKQDMACLK.E          | Carbamidomethyl: 7               |           |               |                     |                                  |
| 193 - 201 | 589.83       | 64.1          | K.RYEEEEIALR.A         |                                  |           |               |                     |                                  |
| 202 - 212 | 596.84       | 78.1          | R.ATAENEFVALK.K        |                                  |           |               |                     |                                  |
| 8 - 24    | 596.92       | 57.1          | R.AVPAFSCVSACGPR.PGR.C | Carbamidomethyl: 7, 11           |           |               |                     |                                  |
| 378 - 387 | 597.3        | 64.2          | K.AKQDMACLK.E          | Carbamidomethyl: 7; Oxidation: 5 |           |               |                     |                                  |
| 202 - 212 | 597.33       | 43.2          | R.ATAENEFVALK.K        | Deamidated: 5                    |           |               |                     |                                  |
| 165 - 175 | 597.72       | 82.3          | R.EAECAEADSGR.L        | Carbamidomethyl: 4               |           |               |                     |                                  |
| 367 - 377 | 600.37       | 90.3          | C.KLAGLEELQK.A         |                                  |           |               |                     |                                  |
| 301 - 310 | 609.83       | 44.5          | K.CEEIKATVIR.H         | Carbamidomethyl: 1               |           |               |                     |                                  |
| 318 - 327 | 623.32       | 74            | R.TKEEINELNR.V         |                                  |           |               |                     |                                  |
| 318 - 327 | 623.8        | 59.4          | R.TKEEINELNR.V         | Deamidated: 6                    |           |               |                     |                                  |

|      |              |      |        |           |         |       |                              |                                         |
|------|--------------|------|--------|-----------|---------|-------|------------------------------|-----------------------------------------|
|      |              |      |        | 289 - 298 | 627.77  | 69.5  | R.SRAEAESWYR.S               |                                         |
|      |              |      |        | 397 - 407 | 632.39  | 93.5  | K.LGLDIEIATYR.R              |                                         |
|      |              |      |        | 368 - 379 | 635.82  | 79.5  | K.LAGLEELQKAK.Q              |                                         |
|      |              |      |        | 192 - 201 | 653.81  | 64.4  | K.KRYEEEEIALR.A              |                                         |
|      |              |      |        | 202 - 213 | 660.81  | 87.2  | R.ATAENEFVALKK.D             |                                         |
|      |              |      |        | 202 - 213 | 661.35  | 74.2  | R.ATAENEFVALKK.D             | Deamidated: 5                           |
|      |              |      |        | 366 - 377 | 680.36  | 75    | K.CKLAGLEELQK.A              | Carbamidomethyl: 1                      |
|      |              |      |        | 268 - 279 | 687.87  | 83.2  | R.DLNMDNIVAEIK.A             |                                         |
|      |              |      |        | 268 - 279 | 695.85  | 61.7  | R.DLNMDNIVAEIK.A             | Oxidation: 4                            |
|      |              |      |        | 175 - 192 | 698.39  | 79.4  | G.RLSSELNSLQEVLE<br>GYKK.R   |                                         |
|      |              |      |        | 92 - 103  | 700.86  | 51.6  | L.NLEIDPNAQCVK.Q             | Carbamidomethyl:<br>10                  |
|      |              |      |        | 317 - 327 | 701.33  | 61.2  | R.RTKEEINELNR.V              |                                         |
|      |              |      |        | 174 - 192 | 717.39  | 47.9  | S.GRLSSELNSLQEVLE<br>EGYKK.R |                                         |
|      |              |      |        | 223 - 241 | 740.41  | 37.8  | K.SDLEANVEALIQETD<br>FLRR.L  |                                         |
|      |              |      |        | 126 - 137 | 746.4   | 39.2  | R.FLEQQNKLLET.K              | Deamidated: 6                           |
|      |              |      |        | 249 - 262 | 755.4   | 85.4  | R.VLQAHISDTSVIVK.<br>M       |                                         |
|      |              |      |        | 249 - 262 | 755.88  | 34.2  | R.VLQAHISDTSVIVK.<br>M       | Deamidated: 3                           |
|      |              |      |        | 145 - 163 | 772.69  | 80    | R.QCCESNLEPLFSGY<br>IETLR.R  | Carbamidomethyl:<br>2, 3                |
|      |              |      |        | 133 - 144 | 776.91  | 75.6  | K.LLETKLQFYQNR.Q             |                                         |
|      |              |      |        | 222 - 241 | 783.09  | 56.7  | R.KSDLEANVEALIQET<br>DFLRR.L |                                         |
|      |              |      |        | 332 - 345 | 796.36  | 74.9  | R.LTAEVENAKCQNSK<br>.L       | Carbamidomethyl:<br>10                  |
|      |              |      |        | 144 - 163 | 824.71  | 80.1  | N.RQCCESNLEPLFSG<br>YIETLR.R | Carbamidomethyl:<br>3, 4                |
|      |              |      |        | 145 - 164 | 824.71  | 42.1  | R.QCCESNLEPLFSGY<br>IETLRR.E | Carbamidomethyl:<br>2, 3                |
|      |              |      |        | 417 - 432 | 847.35  | 132   | R.LCEGVGAVNVCVS<br>SSR.G     | Carbamidomethyl:<br>2, 11               |
|      |              |      |        | 149 - 163 | 869.94  | 84    | E.SNLEPLFSGYIETLR<br>.R      |                                         |
|      |              |      |        | 459 - 475 | 890.84  | 94.3  | C.SGNVVVGTSDVCS<br>PCSR.V    | Carbamidomethyl:<br>12, 15              |
|      |              |      |        | 176 - 191 | 904.98  | 119.5 | R.LSSELNSLQEVLEG<br>YK.K     |                                         |
|      |              |      |        | 176 - 191 | 905.44  | 85.9  | R.LSSELNSLQEVLEG<br>YK.K     | Deamidated: 6                           |
|      |              |      |        | 176 - 192 | 968.97  | 81.4  | R.LSSELNSLQEVLEG<br>YKK.R    |                                         |
|      |              |      |        | 346 - 365 | 1007.48 | 153   | K.LEAAVTQAEQQGEA<br>ALADAK.C |                                         |
|      |              |      |        | 346 - 365 | 1007.98 | 68    | K.LEAAVTQAEQQGEA<br>ALADAK.C | Deamidated: 7                           |
|      |              |      |        | 8 - 17    | 1008.44 | 28.6  | R.AVPAFSCVSA.C               | Carbamidomethyl: 7                      |
|      |              |      |        | 86 - 103  | 1013    | 65.2  | E.SLLTPLNLEIDPNAQ<br>CVK.Q   | Carbamidomethyl:<br>16                  |
|      |              |      |        | 223 - 240 | 1032    | 130   | K.SDLEANVEALIQETD<br>FLR.R   |                                         |
|      |              |      |        | 223 - 240 | 1032.47 | 71.2  | K.SDLEANVEALIQETD<br>FLR.R   | Deamidated: 6                           |
|      |              |      |        | 222 - 240 | 1096.02 | 175.7 | R.KSDLEANVEALIQET<br>DFLRR.R |                                         |
|      |              |      |        | 145 - 163 | 1158.98 | 41    | R.QCCESNLEPLFSGY<br>IETLR.R  | Carbamidomethyl:<br>2, 3; Deamidated: 1 |
| K33b | gij999000012 | 45.9 | 4284.2 | 223 - 228 | 366.18  | 47.4  | R.VLNETR.A                   |                                         |

|  |  |  |  |           |        |      |                             |                                      |
|--|--|--|--|-----------|--------|------|-----------------------------|--------------------------------------|
|  |  |  |  | 135 - 141 | 404.23 | 49.7 | K.LAADDFR.T                 |                                      |
|  |  |  |  | 322 - 328 | 408.74 | 50.9 | E.SQLAEIR.S                 |                                      |
|  |  |  |  | 66 - 72   | 412.23 | 53.8 | R.LASYLEK.V                 |                                      |
|  |  |  |  | 102 - 107 | 432.19 | 37.3 | N.YQSYFR.T                  |                                      |
|  |  |  |  | 184 - 190 | 452.75 | 29.4 | K.EELICLK.Q                 | Carbamidomethyl: 5                   |
|  |  |  |  | 152 - 163 | 467.59 | 34.3 | R.QLVESDINGLRR.I            | Deamidated: 8                        |
|  |  |  |  | 79 - 86   | 474.23 | 43.4 | R.ENAEESR.I                 |                                      |
|  |  |  |  | 229 - 240 | 483.91 | 53.7 | R.AQYEALVETNRR.D            |                                      |
|  |  |  |  | 108 - 115 | 494.79 | 59.1 | R.TIEELQKQ.I                |                                      |
|  |  |  |  | 126 - 134 | 500.34 | 71.6 | R.LVVQIDNAK.L               |                                      |
|  |  |  |  | 126 - 134 | 500.82 | 62.3 | R.LVVQIDNAK.L               | Deamidated: 7                        |
|  |  |  |  | 338 - 345 | 503.31 | 42.2 | E.YQVLLDVR.A                |                                      |
|  |  |  |  | 228 - 240 | 535.98 | 28.9 | T.RAQYEALVETNRR.<br>D       |                                      |
|  |  |  |  | 66 - 74   | 539.83 | 83.7 | R.LASYLEKVR.Q               |                                      |
|  |  |  |  | 164 - 172 | 552.84 | 77.8 | R.ILDELTLCK.S               | Carbamidomethyl: 8                   |
|  |  |  |  | 241 - 248 | 555.25 | 52.5 | R.DVEEWYIR.Q                |                                      |
|  |  |  |  | 348 - 356 | 562.78 | 62   | R.LESEINTYR.G               |                                      |
|  |  |  |  | 4 - 12    | 577.3  | 48.9 | N.FCLPNLSFR.S               | Carbamidomethyl: 2                   |
|  |  |  |  | 57 - 65   | 577.31 | 60.5 | K.ETMQFLNDR.L               |                                      |
|  |  |  |  | 125 - 134 | 578.36 | 40.6 | A.RLVVQIDNAK.L              |                                      |
|  |  |  |  | 57 - 65   | 585.27 | 31.9 | K.ETMQFLNDR.L               | Oxidation: 3                         |
|  |  |  |  | 348 - 357 | 591.26 | 61.1 | R.LESEINTYRG.L              |                                      |
|  |  |  |  | 283 - 292 | 604.27 | 37.2 | E.VELQAQHNL.R.D             |                                      |
|  |  |  |  | 142 - 151 | 604.82 | 59.3 | R.TKYQTELGLR.Q              |                                      |
|  |  |  |  | 142 - 151 | 605.29 | 68.2 | R.TKYQTELGLR.Q              | Deamidated: 4                        |
|  |  |  |  | 173 - 183 | 609.82 | 81   | K.SDLEAQVESLK.E             |                                      |
|  |  |  |  | 181 - 190 | 616.86 | 49.7 | E.SLKEELICLK.Q              | Carbamidomethyl: 8                   |
|  |  |  |  | 163 - 172 | 630.85 | 45.6 | R.RILDELTLCK.S              | Carbamidomethyl: 9                   |
|  |  |  |  | 240 - 248 | 633.32 | 48.4 | R.RDVEEWYIR.Q               |                                      |
|  |  |  |  | 3 - 12    | 634.35 | 39.8 | Y.NFCLPNLSFR.S              | Carbamidomethyl: 3                   |
|  |  |  |  | 46 - 56   | 644.76 | 47.6 | W.FCEGSFNGNEK.E             | Carbamidomethyl: 2                   |
|  |  |  |  | 46 - 56   | 645.28 | 27   | W.FCEGSFNGNEK.E             | Carbamidomethyl:<br>2; Deamidated: 7 |
|  |  |  |  | 229 - 239 | 647.31 | 94.8 | R.AQYEALVETNR.R             |                                      |
|  |  |  |  | 229 - 239 | 647.8  | 70.7 | R.AQYEALVETNR.R             | Deamidated: 2                        |
|  |  |  |  | 91 - 101  | 650.26 | 46.3 | R.SQQQEPLVCPN.Y             | Carbamidomethyl: 9                   |
|  |  |  |  | 276 - 292 | 664.35 | 44   | R.RTVNALEVELQAQH<br>NLR.D   |                                      |
|  |  |  |  | 282 - 292 | 668.82 | 49.1 | L.LEVELQAQHNL.R.D           |                                      |
|  |  |  |  | 346 - 356 | 676.31 | 65.3 | R.ARLESEINTYR.G             |                                      |
|  |  |  |  | 294 - 305 | 682.32 | 79.3 | D.SLENTLTETEAR.Y            |                                      |
|  |  |  |  | 191 - 201 | 684.27 | 65.7 | K.QNHEQEVN.TLR.S            |                                      |
|  |  |  |  | 152 - 163 | 700.37 | 42.8 | R.QLVESDINGLRR.I            |                                      |
|  |  |  |  | 151 - 162 | 700.85 | 40.1 | L.RQLVESDINGLR.R            | Deamidated: 9                        |
|  |  |  |  | 228 - 239 | 725.35 | 39.9 | T.RAQYEALVETNR.R            |                                      |
|  |  |  |  | 229 - 240 | 725.86 | 39   | R.AQYEALVETNRR.D            | Deamidated: 10                       |
|  |  |  |  | 229 - 240 | 725.88 | 26.3 | R.AQYEALVETNRR.D            | Deamidated: 2                        |
|  |  |  |  | 179 - 190 | 730.92 | 73.7 | Q.VESLKEELICLK.Q            | Carbamidomethyl:<br>10               |
|  |  |  |  | 293 - 305 | 739.84 | 98.7 | R.DSLENTLTETEAR.Y           |                                      |
|  |  |  |  | 293 - 305 | 740.3  | 93.1 | R.DSLENTLTETEAR.Y           | Deamidated: 5                        |
|  |  |  |  | 173 - 191 | 744.75 | 29.8 | K.SDLEAQVESLKEELI<br>CLKQ.N | Carbamidomethyl:<br>16               |

|     |              |      |        |           |         |       |                                 |                                       |
|-----|--------------|------|--------|-----------|---------|-------|---------------------------------|---------------------------------------|
|     |              |      |        | 334 - 345 | 752.91  | 100.2 | R.QNQEYQVLLDVR.A                |                                       |
|     |              |      |        | 334 - 345 | 753.37  | 41    | R.QNQEYQVLLDVR.A                | Deamidated: 3                         |
|     |              |      |        | 1 - 12    | 759.35  | 51.5  | -.SYNFCLPNLSFR.S                | Carbamidomethyl: 5                    |
|     |              |      |        | 280 - 292 | 760.92  | 94.7  | N.ALEVELQAQHNLR.<br>D           |                                       |
|     |              |      |        | 208 - 222 | 813.4   | 97.7  | R.LNVEVDAAPTVDLN<br>R.V         |                                       |
|     |              |      |        | 201 - 222 | 813.41  | 42.6  | L.RSQLGDRLNVEVDA<br>APTVDLNR.V  |                                       |
|     |              |      |        | 208 - 222 | 813.89  | 45.9  | R.LNVEVDAAPTVDLN<br>R.V         | Deamidated: 2                         |
|     |              |      |        | 256 - 276 | 821.76  | 62.8  | K.QVVSSEQLQSYQ<br>AEIILRR.T     |                                       |
|     |              |      |        | 256 - 276 | 822.08  | 26.9  | K.QVVSSEQLQSYQ<br>AEIILRR.T     | Deamidated: 1                         |
|     |              |      |        | 306 - 328 | 888.79  | 50.6  | R.YSCQLSQVQSLIVN<br>VESQLAEIR.S | Carbamidomethyl: 3                    |
|     |              |      |        | 277 - 292 | 917.98  | 138.5 | R.TVNALEVELQAQHN<br>LR.D        |                                       |
|     |              |      |        | 277 - 292 | 918.46  | 122.2 | R.TVNALEVELQAQHN<br>LR.D        | Deamidated: 10                        |
|     |              |      |        | 277 - 292 | 918.48  | 99.6  | R.TVNALEVELQAQHN<br>LR.D        | Deamidated: 3                         |
|     |              |      |        | 173 - 190 | 1052.55 | 102.5 | K.SDLEAQVESLKEELI<br>CLK.Q      | Carbamidomethyl:<br>16                |
|     |              |      |        | 173 - 190 | 1053.03 | 63.9  | K.SDLEAQVESLKEELI<br>CLK.Q      | Carbamidomethyl:<br>16; Deamidated: 6 |
|     |              |      |        | 91 - 107  | 1072.43 | 77.8  | R.SQQQEPLVCPNYQ<br>SYFR.T       | Carbamidomethyl: 9                    |
|     |              |      |        | 91 - 107  | 1073    | 45.1  | R.SQQQEPLVCPNYQ<br>SYFR.T       | Carbamidomethyl:<br>9; Deamidated: 2  |
|     |              |      |        | 256 - 275 | 1154.08 | 111   | K.QVVSSEQLQSYQ<br>AEIILR.R      |                                       |
| K81 | gil999000007 | 55.1 | 5420.1 | 311 - 316 | 356.72  | 38.1  | R.HGETLR.R                      |                                       |
|     |              |      |        | 33 - 38   | 378.16  | 27.1  | R.GISCYR.G                      | Carbamidomethyl: 4                    |
|     |              |      |        | 116 - 122 | 406.27  | 47.9  | R.FAAFIDK.V                     |                                       |
|     |              |      |        | 39 - 47   | 426.24  | 60    | R.GLTGGFGSR.S                   |                                       |
|     |              |      |        | 272 - 279 | 451.28  | 48.4  | M.DNIVAEIK.A                    |                                       |
|     |              |      |        | 125 - 131 | 453.78  | 42.3  | R.FLEQQNK.L                     |                                       |
|     |              |      |        | 397 - 408 | 473.95  | 58.5  | K.LGLDIEIATYRR.L                |                                       |
|     |              |      |        | 242 - 248 | 476.27  | 49.4  | R.LYEEEEIR.V                    |                                       |
|     |              |      |        | 254 - 262 | 481.28  | 75.2  | H.ISDTSVIVK.M                   |                                       |
|     |              |      |        | 137 - 143 | 484.74  | 43.3  | K.LQFYQNR.Q                     |                                       |
|     |              |      |        | 137 - 143 | 485.24  | 26.5  | K.LQFYQNR.Q                     | Deamidated: 6                         |
|     |              |      |        | 409 - 416 | 487.25  | 73.4  | R.LLEGQQR.L                     | Deamidated: 5                         |
|     |              |      |        | 332 - 340 | 487.76  | 52.8  | R.LTAEVENAK.C                   |                                       |
|     |              |      |        | 125 - 136 | 497.6   | 34.2  | R.FLEQQNKLLLETK.L               |                                       |
|     |              |      |        | 380 - 387 | 497.75  | 62.4  | K.QDMACLLK.E                    | Carbamidomethyl:<br>5; Oxidation: 3   |
|     |              |      |        | 194 - 201 | 504.79  | 49.6  | R.YEEVALR.A                     |                                       |
|     |              |      |        | 214 - 221 | 506.23  | 43.4  | K.DVDCAYLK.K                    | Carbamidomethyl: 4                    |
|     |              |      |        | 291 - 298 | 506.26  | 48.2  | R.AEAESWYR.S                    |                                       |
|     |              |      |        | 10 - 23   | 507.89  | 38    | R.AFSCVSACGPRPG<br>R.C          | Carbamidomethyl:<br>4, 8              |
|     |              |      |        | 320 - 327 | 508.76  | 36    | K.EEINELNR.V                    |                                       |
|     |              |      |        | 280 - 288 | 519.76  | 74.3  | K.AQYDDIASR.S                   |                                       |
|     |              |      |        | 116 - 124 | 533.82  | 69.7  | R.FAAFIDKVR.F                   |                                       |
|     |              |      |        | 368 - 377 | 536.33  | 87.2  | K.LAGLEEALQK.A                  |                                       |
|     |              |      |        | 409 - 417 | 543.82  | 35.2  | R.LLEGQEQLR.C                   | Deamidated: 5                         |

|  |  |  |  |           |        |       |                               |                                  |
|--|--|--|--|-----------|--------|-------|-------------------------------|----------------------------------|
|  |  |  |  | 241 - 248 | 554.31 | 49.8  | R.RLYEEEEIR.V                 |                                  |
|  |  |  |  | 24 - 32   | 556.23 | 66.8  | R.CCITAAPYR.G                 | Carbamidomethyl: 1, 2            |
|  |  |  |  | 388 - 396 | 564.27 | 39.2  | K.EYQEVMSK.L                  |                                  |
|  |  |  |  | 408 - 416 | 565.29 | 43    | R.RLEGGQEQR.L                 | Deamidated: 6                    |
|  |  |  |  | 331 - 340 | 565.76 | 38.9  | Q.RLTAEVENAK.C                |                                  |
|  |  |  |  | 213 - 221 | 570.29 | 72.5  | K.KDVDCAYLR.K                 | Carbamidomethyl: 5               |
|  |  |  |  | 193 - 201 | 582.79 | 61.6  | R.RYEEVEALR.A                 |                                  |
|  |  |  |  | 378 - 387 | 589.3  | 63.3  | K.AKQDMACLK.E                 | Carbamidomethyl: 7               |
|  |  |  |  | 202 - 212 | 596.84 | 78.1  | R.ATAENEFVALK.K               |                                  |
|  |  |  |  | 378 - 387 | 597.3  | 64.2  | K.AKQDMACLK.E                 | Carbamidomethyl: 7; Oxidation: 5 |
|  |  |  |  | 202 - 212 | 597.33 | 43.2  | R.ATAENEFVALK.K               | Deamidated: 5                    |
|  |  |  |  | 164 - 174 | 597.72 | 82.3  | R.EAECADSGR.L                 | Carbamidomethyl: 4               |
|  |  |  |  | 367 - 377 | 600.37 | 90.3  | R.KLAGLEEALQK.A               |                                  |
|  |  |  |  | 10 - 20   | 606.24 | 73.6  | R.AFSCVSACGPR.P               | Carbamidomethyl: 4, 8            |
|  |  |  |  | 301 - 310 | 609.83 | 44.5  | K.CEEIKATVIR.H                | Carbamidomethyl: 1               |
|  |  |  |  | 193 - 202 | 618.3  | 25.4  | R.RYEEVEALRA.T                |                                  |
|  |  |  |  | 318 - 327 | 623.32 | 74    | R.TKEEINELNR.V                |                                  |
|  |  |  |  | 318 - 327 | 623.8  | 59.4  | R.TKEEINELNR.V                | Deamidated: 6                    |
|  |  |  |  | 289 - 298 | 627.77 | 69.5  | R.SRAEESWYR.S                 |                                  |
|  |  |  |  | 397 - 407 | 632.39 | 93.5  | K.LGLDIEIATYR.R               |                                  |
|  |  |  |  | 368 - 379 | 635.82 | 79.5  | K.LAGLEEALQKAK.Q              |                                  |
|  |  |  |  | 202 - 213 | 660.81 | 87.2  | R.ATAENEFVALKK.D              |                                  |
|  |  |  |  | 202 - 213 | 661.35 | 74.2  | R.ATAENEFVALKK.D              | Deamidated: 5                    |
|  |  |  |  | 268 - 279 | 687.87 | 83.2  | R.DLNMDNIVAEIK.A              |                                  |
|  |  |  |  | 268 - 279 | 695.85 | 61.7  | R.DLNMDNIVAEIK.A              | Oxidation: 4                     |
|  |  |  |  | 174 - 191 | 698.39 | 79.4  | G.RLSSELNSLQEVLE<br>GYKK.R    |                                  |
|  |  |  |  | 91 - 102  | 700.86 | 51.6  | L.NLEIDPNAQCVK.Q              | Carbamidomethyl: 10              |
|  |  |  |  | 317 - 327 | 701.33 | 61.2  | R.RTKEEINELNR.V               |                                  |
|  |  |  |  | 433 - 446 | 711.76 | 100.3 | R.GGVVCGDLCVSGS<br>R.P        | Carbamidomethyl: 5, 9            |
|  |  |  |  | 173 - 191 | 717.39 | 47.9  | S.GRLSSELNSLQEVLE<br>EGYKK.R  |                                  |
|  |  |  |  | 346 - 366 | 724.05 | 60.3  | K.LEAAVTQAEQQGEA<br>ALADAKR.K |                                  |
|  |  |  |  | 223 - 241 | 740.41 | 37.8  | K.SDLEANVEALIQETD<br>FLRR.L   |                                  |
|  |  |  |  | 125 - 136 | 746.4  | 39.2  | R.FLEQQNKLLK.L                | Deamidated: 6                    |
|  |  |  |  | 249 - 262 | 755.4  | 85.4  | R.VLQAHISDTSVIVK.<br>M        |                                  |
|  |  |  |  | 249 - 262 | 755.88 | 34.2  | R.VLQAHISDTSVIVK.<br>M        | Deamidated: 3                    |
|  |  |  |  | 144 - 162 | 772.69 | 80    | R.QCCESNLEPLFSGY<br>IETLR.R   | Carbamidomethyl: 2, 3            |
|  |  |  |  | 132 - 143 | 776.91 | 75.6  | K.LLETKLQFYQNR.Q              |                                  |
|  |  |  |  | 222 - 241 | 783.09 | 56.7  | R.KSDLEANVEALIQET<br>DFLRR.L  |                                  |
|  |  |  |  | 332 - 345 | 796.36 | 74.9  | R.LTAEVENAKCQNSK<br>.L        | Carbamidomethyl: 10              |
|  |  |  |  | 143 - 162 | 824.71 | 80.1  | N.RQCCESNLEPLFSG<br>YIETLR.R  | Carbamidomethyl: 3, 4            |
|  |  |  |  | 144 - 163 | 824.71 | 42.1  | R.QCCESNLEPLFSGY<br>IETLRR.E  | Carbamidomethyl: 2, 3            |
|  |  |  |  | 417 - 432 | 855.36 | 131.9 | R.LCEGVGSVNVCVS<br>SSR.G      | Carbamidomethyl: 2, 11           |

|     |              |      |        |           |         |       |                               |                                             |
|-----|--------------|------|--------|-----------|---------|-------|-------------------------------|---------------------------------------------|
|     |              |      |        | 417 - 432 | 855.89  | 30.3  | R.LCEGVGSVNVCVS<br>SSR.G      | Carbamidomethyl:<br>2, 11; Deamidated:<br>9 |
|     |              |      |        | 148 - 162 | 869.94  | 84    | E.SNLEPLFSGYIETLR<br>.R       |                                             |
|     |              |      |        | 175 - 190 | 904.98  | 119.5 | R.LSSELNSLQEVLEG<br>YK.K      |                                             |
|     |              |      |        | 175 - 190 | 905.44  | 85.9  | R.LSSELNSLQEVLEG<br>YK.K      | Deamidated: 6                               |
|     |              |      |        | 175 - 191 | 968.97  | 81.4  | R.LSSELNSLQEVLEG<br>YKK.R     |                                             |
|     |              |      |        | 346 - 365 | 1007.48 | 153   | K.LEAAVTQAEQQGEA<br>ALADAK.R  |                                             |
|     |              |      |        | 346 - 365 | 1007.98 | 68    | K.LEAAVTQAEQQGEA<br>ALADAK.R  | Deamidated: 7                               |
|     |              |      |        | 85 - 102  | 1013    | 65.2  | E.SLLTPLNLEIDPNAQ<br>CVK.Q    | Carbamidomethyl:<br>16                      |
|     |              |      |        | 223 - 240 | 1032    | 130   | K.SDLEANVEALIQETD<br>FLR.R    |                                             |
|     |              |      |        | 223 - 240 | 1032.47 | 71.2  | K.SDLEANVEALIQETD<br>FLR.R    | Deamidated: 6                               |
|     |              |      |        | 346 - 366 | 1086    | 63.9  | K.LEAAVTQAEQQGEA<br>ALADAKR.K | Deamidated: 7                               |
|     |              |      |        | 222 - 240 | 1096.02 | 175.7 | R.KSDLEANVEALIQET<br>DFLR.R   |                                             |
|     |              |      |        | 144 - 162 | 1158.98 | 41    | R.QCCESNLEPLFSGY<br>IETLR.R   | Carbamidomethyl:<br>2, 3; Deamidated: 1     |
| K86 | gil999000010 | 54.8 | 5435.2 | 327 - 332 | 356.72  | 38.1  | R.HGETLR.R                    |                                             |
|     |              |      |        | 133 - 139 | 406.27  | 47.9  | R.FAAFIDK.V                   |                                             |
|     |              |      |        | 492 - 500 | 445.74  | 98.4  | R.VGGSILGCK.K                 | Carbamidomethyl: 8                          |
|     |              |      |        | 288 - 295 | 451.28  | 48.4  | M.DNIVAEIK.A                  |                                             |
|     |              |      |        | 142 - 148 | 453.78  | 42.3  | R.FLEQQNK.L                   |                                             |
|     |              |      |        | 413 - 424 | 473.95  | 58.5  | K.LGLDIEIATYRR.L              |                                             |
|     |              |      |        | 258 - 264 | 476.27  | 49.4  | R.LYEEEEIR.V                  |                                             |
|     |              |      |        | 270 - 278 | 481.28  | 75.2  | H.ISDTSVIVK.M                 |                                             |
|     |              |      |        | 154 - 160 | 484.74  | 43.3  | K.LQFYQNR.Q                   |                                             |
|     |              |      |        | 154 - 160 | 485.24  | 26.5  | K.LQFYQNR.Q                   | Deamidated: 6                               |
|     |              |      |        | 425 - 432 | 487.25  | 73.4  | R.LLEGEEQR.L                  |                                             |
|     |              |      |        | 348 - 356 | 487.76  | 52.8  | R.LTAEVENAK.C                 |                                             |
|     |              |      |        | 7 - 15    | 490.28  | 27.1  | R.ISPGYSVTR.T                 |                                             |
|     |              |      |        | 142 - 153 | 497.6   | 34.2  | R.FLEQQNKLLETK.L              |                                             |
|     |              |      |        | 396 - 403 | 497.75  | 62.4  | K.QDMACLK.E                   | Carbamidomethyl:<br>5; Oxidation: 3         |
|     |              |      |        | 210 - 217 | 504.79  | 49.6  | R.YEEVALR.A                   |                                             |
|     |              |      |        | 230 - 237 | 506.23  | 43.4  | K.DVDCAYLR.K                  | Carbamidomethyl: 4                          |
|     |              |      |        | 307 - 314 | 506.26  | 48.2  | R.AEAESWYR.S                  |                                             |
|     |              |      |        | 336 - 343 | 508.76  | 36    | K.EEINELNR.V                  |                                             |
|     |              |      |        | 296 - 304 | 524.22  | 73.7  | K.AHYDDIASR.S                 |                                             |
|     |              |      |        | 133 - 141 | 533.82  | 69.7  | R.FAAFIDKVR.F                 |                                             |
|     |              |      |        | 384 - 393 | 536.33  | 87.2  | K.LAGLEEALQK.A                |                                             |
|     |              |      |        | 425 - 433 | 543.82  | 35.2  | R.LLEGEEQRL.C                 |                                             |
|     |              |      |        | 54 - 64   | 545.76  | 82.3  | R.SVSALGSCGPR.I               | Carbamidomethyl: 8                          |
|     |              |      |        | 31 - 39   | 549.21  | 51.7  | R.CCISAAPYR.G                 | Carbamidomethyl:<br>1, 2                    |
|     |              |      |        | 257 - 264 | 554.31  | 49.8  | R.RLYEEEEIR.V                 |                                             |
|     |              |      |        | 404 - 412 | 564.27  | 39.2  | K.EYQEVMSK.L                  |                                             |
|     |              |      |        | 424 - 432 | 565.29  | 43    | R.RLEGEEQR.L                  |                                             |
|     |              |      |        | 347 - 356 | 565.76  | 38.9  | Q.RLTAEVENAK.C                |                                             |

|  |  |  |  |           |        |       |                              |                                  |
|--|--|--|--|-----------|--------|-------|------------------------------|----------------------------------|
|  |  |  |  | 229 - 237 | 570.29 | 72.5  | K.KDVDCAYLR.K                | Carbamidomethyl: 5               |
|  |  |  |  | 16 - 26   | 577.74 | 60.7  | R.TFSSCSAVAPK.T              | Carbamidomethyl: 5               |
|  |  |  |  | 209 - 217 | 582.79 | 61.6  | K.RYEEEEVALR.A               |                                  |
|  |  |  |  | 394 - 403 | 589.3  | 63.3  | K.AKQDMACLLK.E               | Carbamidomethyl: 7               |
|  |  |  |  | 218 - 228 | 596.84 | 78.1  | R.ATAENEFVALK.K              |                                  |
|  |  |  |  | 394 - 403 | 597.3  | 64.2  | K.AKQDMACLLK.E               | Carbamidomethyl: 7; Oxidation: 5 |
|  |  |  |  | 218 - 228 | 597.33 | 43.2  | R.ATAENEFVALK.K              | Deamidated: 5                    |
|  |  |  |  | 181 - 191 | 597.72 | 82.3  | R.EAECAEADSGR.L              | Carbamidomethyl: 4               |
|  |  |  |  | 383 - 393 | 600.37 | 90.3  | C.KLAGLEELQK.A               |                                  |
|  |  |  |  | 317 - 326 | 609.83 | 44.5  | K.CEEIKATVIR.H               | Carbamidomethyl: 1               |
|  |  |  |  | 209 - 218 | 618.3  | 25.4  | K.RYEEEEVALR.A               |                                  |
|  |  |  |  | 334 - 343 | 623.32 | 74    | R.TKEEINELNR.V               |                                  |
|  |  |  |  | 334 - 343 | 623.8  | 59.4  | R.TKEEINELNR.V               | Deamidated: 6                    |
|  |  |  |  | 305 - 314 | 627.77 | 69.5  | R.SRAEAESWYR.S               |                                  |
|  |  |  |  | 413 - 423 | 632.39 | 93.5  | K.LGLDIEIATYR.R              |                                  |
|  |  |  |  | 384 - 395 | 635.82 | 79.5  | K.LAGLEELQKAK.Q              |                                  |
|  |  |  |  | 208 - 217 | 646.81 | 51.9  | K.KRYEEEEVALR.A              |                                  |
|  |  |  |  | 218 - 229 | 660.81 | 87.2  | R.ATAENEFVALKK.D             |                                  |
|  |  |  |  | 218 - 229 | 661.35 | 74.2  | R.ATAENEFVALKK.D             | Deamidated: 5                    |
|  |  |  |  | 382 - 393 | 680.36 | 75    | K.CKLAGLEELQK.A              | Carbamidomethyl: 1               |
|  |  |  |  | 284 - 295 | 687.87 | 83.2  | R.DLNMDNIVAEIK.A             |                                  |
|  |  |  |  | 284 - 295 | 695.85 | 61.7  | R.DLNMDNIVAEIK.A             | Oxidation: 4                     |
|  |  |  |  | 191 - 208 | 698.39 | 79.4  | G.RLSSELNSLQEVLE<br>GYKK.R   |                                  |
|  |  |  |  | 108 - 119 | 700.86 | 51.6  | L.NLEIDPNAQCVK.Q             | Carbamidomethyl: 10              |
|  |  |  |  | 333 - 343 | 701.33 | 61.2  | R.RTKEEINELNR.V              |                                  |
|  |  |  |  | 190 - 208 | 717.39 | 47.9  | S.GRLSSELNSLQEVLE<br>EGYKK.R |                                  |
|  |  |  |  | 239 - 257 | 740.41 | 37.8  | K.SDLEANVEALIQETD<br>FLRR.L  |                                  |
|  |  |  |  | 142 - 153 | 746.4  | 39.2  | R.FLEQQNKLLET.K              | Deamidated: 6                    |
|  |  |  |  | 265 - 278 | 755.4  | 85.4  | R.VLQAHISDTSVIVK.<br>M       |                                  |
|  |  |  |  | 265 - 278 | 755.88 | 34.2  | R.VLQAHISDTSVIVK.<br>M       | Deamidated: 3                    |
|  |  |  |  | 161 - 179 | 772.69 | 80    | R.QCCESNLEPLFSGY<br>IETLR.R  | Carbamidomethyl: 2, 3            |
|  |  |  |  | 149 - 160 | 776.91 | 75.6  | K.LLETKLQFYQNR.Q             |                                  |
|  |  |  |  | 238 - 257 | 783.09 | 56.7  | R.KSDLEANVEALIQET<br>DFLRR.L |                                  |
|  |  |  |  | 348 - 361 | 796.36 | 74.9  | R.LTAEVENAKCQNSK<br>.L       | Carbamidomethyl: 10              |
|  |  |  |  | 161 - 180 | 824.71 | 42.1  | R.QCCESNLEPLFSGY<br>IETLRR.E | Carbamidomethyl: 2, 3            |
|  |  |  |  | 160 - 179 | 824.71 | 80.1  | N.RQCCESNLEPLFSG<br>YIETLR.R | Carbamidomethyl: 3, 4            |
|  |  |  |  | 433 - 448 | 847.35 | 132   | R.LCEGVGAVNVCVS<br>SSR.G     | Carbamidomethyl: 2, 11           |
|  |  |  |  | 165 - 179 | 869.94 | 84    | E.SNLEPLFSGYIETLR<br>.R      |                                  |
|  |  |  |  | 475 - 491 | 890.84 | 94.3  | C.SGNVVVGTSDVCS<br>PCSR.V    | Carbamidomethyl: 12, 15          |
|  |  |  |  | 192 - 207 | 904.98 | 119.5 | R.LSSELNSLQEVLEG<br>YK.K     |                                  |
|  |  |  |  | 192 - 207 | 905.44 | 85.9  | R.LSSELNSLQEVLEG<br>YK.K     | Deamidated: 6                    |
|  |  |  |  | 192 - 208 | 968.97 | 81.4  | R.LSSELNSLQEVLEG             |                                  |

|                           |              |      |       |           |         |       |                                  |                                                 |
|---------------------------|--------------|------|-------|-----------|---------|-------|----------------------------------|-------------------------------------------------|
|                           |              |      |       |           |         |       | YKK.R                            |                                                 |
|                           |              |      |       | 362 - 381 | 1007.48 | 153   | K.LEAAVTQAEQQGEA<br>ALADAK.C     |                                                 |
|                           |              |      |       | 362 - 381 | 1007.98 | 68    | K.LEAAVTQAEQQGEA<br>ALADAK.C     | Deamidated: 7                                   |
|                           |              |      |       | 102 - 119 | 1013    | 65.2  | E.SLLTPLNLEIDPNAQ<br>CVK.Q       | Carbamidomethyl:<br>16                          |
|                           |              |      |       | 239 - 256 | 1032    | 130   | K.SDLEANVEALIQETD<br>FLR.R       |                                                 |
|                           |              |      |       | 239 - 256 | 1032.47 | 71.2  | K.SDLEANVEALIQETD<br>FLR.R       | Deamidated: 6                                   |
|                           |              |      |       | 238 - 256 | 1096.02 | 175.7 | R.KSDLEANVEALIQET<br>DFLR.R      |                                                 |
|                           |              |      |       | 161 - 179 | 1158.98 | 41    | R.QCCESNLEPLFSGY<br>IETLR.R      | Carbamidomethyl:<br>2, 3; Deamidated: 1         |
| KAP10-<br>like<br>Partial | gij999000052 | 46.4 | 410   | 307 - 315 | 551.77  | 44.1  | R.TFYIPSSCK.Q                    | Carbamidomethyl: 8                              |
|                           |              |      |       | 330 - 339 | 582.3   | 57.6  | R.PICSGPITYR.Q                   | Carbamidomethyl: 3                              |
|                           |              |      |       | 277 - 286 | 604.79  | 50.1  | R.SISCEPLSCR.P                   | Carbamidomethyl:<br>4, 9                        |
|                           |              |      |       | 340 - 349 | 614.31  | 34.2  | R.QPYLTSISYR.P                   |                                                 |
|                           |              |      |       | 264 - 273 | 626.29  | 41.4  | R.PCQPTCYVVK.R                   | Carbamidomethyl:<br>2, 6                        |
|                           |              |      |       | 206 - 216 | 666.33  | 56    | R.VSLVCEPICVR.P                  | Carbamidomethyl:<br>5, 9                        |
|                           |              |      |       | 350 - 361 | 771.86  | 32.3  | R.PACYRPFYSILR.R                 | Carbamidomethyl: 3                              |
|                           |              |      |       | 133 - 146 | 847.88  | 77.6  | R.VFCVPSSCQPILCK.<br>P           | Carbamidomethyl:<br>3, 8, 13                    |
| KAP11.<br>1               | gij999000018 | 16.7 | 124   | 145 - 155 | 688.24  | 78.5  | R.TYQQSCVSSCR.R                  | Carbamidomethyl:<br>6, 10                       |
|                           |              |      |       | 121 - 144 | 851.06  | 25.3  | R.SISTVCQPVGGVSTI<br>CQPTCGVSR.T | Carbamidomethyl:<br>6, 16, 20;<br>Deamidated: 7 |
| KAP13.<br>1               | gij999000030 | 17.4 | 387.5 | 136 - 144 | 576.33  | 45    | R.SSFYRPTFF.S                    |                                                 |
|                           |              |      |       | 63 - 79   | 676.63  | 38.4  | R.TQTVSSPCQTSCY<br>RPR.T         | Carbamidomethyl:<br>9, 13; Deamidated:<br>10    |
|                           |              |      |       | 136 - 147 | 741.38  | 29.8  | R.SSFYRPTFFSSR.S                 |                                                 |
|                           |              |      |       | 148 - 163 | 861.87  | 69.8  | R.SGQSLSFQPTCGS<br>GFY.-         | Carbamidomethyl:<br>11                          |
|                           |              |      |       | 148 - 163 | 862.33  | 36.4  | R.SGQSLSFQPTCGS<br>GFY.-         | Carbamidomethyl:<br>11; Deamidated: 3           |
|                           |              |      |       | 20 - 36   | 934.38  | 108.1 | R.YSGSSCGSSFPSNL<br>VYR.T        | Carbamidomethyl: 6                              |
| KAP15.<br>1               | gij999000032 | 14.6 | 180   | 68 - 82   | 958.41  | 105.1 | R.FFQTSCSHPNFIF<br>R.S           | Carbamidomethyl: 6                              |
|                           |              |      |       | 68 - 82   | 958.96  | 74.8  | R.FFQTSCSHPNFIF<br>R.S           | Carbamidomethyl:<br>6; Deamidated: 3            |
| KAP16.<br>2               | gij999000035 | 6.7  | 201.5 | 1 - 19    | 1063.96 | 119.6 | -.SYYYGNYYGGLGYG<br>LGGFR.G      |                                                 |
|                           |              |      |       | 1 - 19    | 1064.53 | 58.9  | -.SYYYGNYYGGLGYG<br>LGGFR.G      | Deamidated: 6                                   |
| KAP19.<br>3               | gij999000016 | 7.6  | 692.4 | 59 - 65   | 405.64  | 39.9  | R.CPSSFGR.Y                      | Carbamidomethyl: 1                              |
|                           |              |      |       | 25 - 32   | 450.62  | 33    | R.GCGCGSFR.R                     | Carbamidomethyl:<br>2, 4                        |
|                           |              |      |       | 13 - 24   | 572.81  | 62.8  | Y.GYGGFGGLGFR.<br>G              |                                                 |
|                           |              |      |       | 9 - 24    | 767.88  | 96.7  | S.GLGYGYGGFGGLG<br>FGR.G         |                                                 |



|                 |              |      |       |           |        |       |                                        |                                        |
|-----------------|--------------|------|-------|-----------|--------|-------|----------------------------------------|----------------------------------------|
|                 |              |      |       | 2 - 24    | 817.03 | 41.6  | C.HYSNYYSGGLGYGY<br>GGFGGLGFGR.G       |                                        |
|                 |              |      |       | 34 - 58   | 858.02 | 36.8  | R.LGFSTGFGGYGCG<br>SGFGSFGYGYNR.C      | Carbamidomethyl:<br>12                 |
|                 |              |      |       | 1 - 24    | 870.34 | 80.9  | -.<br>CHYSNYYSGGLGYGY<br>GGFGGLGFGR.G  | Carbamidomethyl: 1                     |
|                 |              |      |       | 1 - 24    | 870.67 | 46.4  | -.<br>CHYSNYYSGGLGYGY<br>GGFGGLGFGR.G  | Carbamidomethyl:<br>1; Deamidated: 5   |
|                 |              |      |       | 1 - 25    | 889.36 | 43.8  | -.<br>CHYSNYYSGGLGYGY<br>GGFGGLGFGRG.C | Carbamidomethyl: 1                     |
|                 |              |      |       | 1 - 25    | 889.71 | 25.1  | -.<br>CHYSNYYSGGLGYGY<br>GGFGGLGFGRG.C | Carbamidomethyl:<br>1; Deamidated: 5   |
|                 |              |      |       | 33 - 58   | 910.38 | 38.4  | R.RLGFSTGFGGYGC<br>GSGFGSFGYGYNR.C     | Carbamidomethyl:<br>13; Deamidated: 25 |
|                 |              |      |       | 6 - 24    | 974.4  | 130.8 | N.YYSGLGYGYGGFG<br>GLGFGR.G            |                                        |
| KAP19.<br>5     | gij999000015 | 7.7  | 413.9 | 34 - 41   | 427.17 | 52.4  | R.LGCGSGFR.G                           | Carbamidomethyl: 3                     |
|                 |              |      |       | 25 - 32   | 450.62 | 33    | R.GCGCSFR.R                            | Carbamidomethyl:<br>2, 4               |
|                 |              |      |       | 65 - 72   | 512.24 | 27.5  | R.RCGFSSFY.-                           | Carbamidomethyl: 2                     |
|                 |              |      |       | 13 - 24   | 572.81 | 62.8  | Y.GYGGFGGLGFGR.<br>G                   |                                        |
|                 |              |      |       | 9 - 24    | 767.88 | 96.7  | R.GLYGYGGFGGLG<br>FGR.G                |                                        |
|                 |              |      |       | 42 - 64   | 876.66 | 78.2  | R.GYGCDSGFGSFGS<br>GCCHRPLFFR.R        | Carbamidomethyl:<br>4, 15, 16          |
| KAP2.3<br>var2  | gij999000041 | 14   | 269.9 | 42 - 48   | 408.25 | 47.4  | R.PVTFVPR.C                            |                                        |
|                 |              |      |       | 49 - 58   | 450.18 | 33.9  | R.CTRPICEPCR.R                         | Carbamidomethyl:<br>1, 6, 9            |
|                 |              |      |       | 52 - 58   | 466.17 | 25.5  | R.PICEPCR.R                            | Carbamidomethyl:<br>3, 6               |
|                 |              |      |       | 32 - 48   | 620.01 | 41.7  | R.PVSSQTTVSRPVT<br>VPR.C               |                                        |
|                 |              |      |       | 59 - 74   | 685.23 | 73.9  | R.RPVCCDPCSLQEG<br>CCR.P               | Carbamidomethyl:<br>4, 5, 8, 14, 15    |
| KAP6.1          | gij999000021 | 8.3  | 394.4 | 35 - 49   | 561.56 | 47.6  | R.RLGCGYGCYGYG<br>SR.S                 | Carbamidomethyl:<br>4, 8               |
|                 |              |      |       | 50 - 61   | 632.24 | 83.7  | R.SLCGSGYGYGSR.S                       | Carbamidomethyl: 3                     |
|                 |              |      |       | 36 - 49   | 763.77 | 82.4  | R.LGCGYGCYGYGS<br>R.S                  | Carbamidomethyl:<br>3, 7               |
|                 |              |      |       | 21 - 34   | 770.79 | 78.6  | G.LGCGYGSCYGSF<br>R.R                  | Carbamidomethyl:<br>3, 8               |
|                 |              |      |       | 20 - 34   | 799.29 | 102.1 | G.GLGCYGSCYGSF<br>FR.R                 | Carbamidomethyl:<br>4, 9               |
| KAP6.3          | gij999000020 | 8.3  | 430.3 | 35 - 49   | 561.56 | 47.6  | R.RLGCGYGCYGYG<br>SR.S                 | Carbamidomethyl:<br>4, 8               |
|                 |              |      |       | 50 - 61   | 630.72 | 64.4  | R.SLCGSGYGCGR.P                        | Carbamidomethyl:<br>3, 9               |
|                 |              |      |       | 36 - 49   | 763.77 | 82.4  | R.LGCGYGCYGYGS<br>R.S                  | Carbamidomethyl:<br>3, 7               |
|                 |              |      |       | 21 - 34   | 770.79 | 78.6  | G.LGCGYGSCYGSF<br>R.R                  | Carbamidomethyl:<br>3, 8               |
|                 |              |      |       | 20 - 34   | 799.29 | 102.1 | G.GLGCYGSCYGSF<br>FR.R                 | Carbamidomethyl:<br>4, 9               |
|                 |              |      |       | 50 - 65   | 845.81 | 55.1  | R.SLCGSGYGCGRP<br>LYG.C                | Carbamidomethyl:<br>3, 9               |
| KAP9.2<br>-like | gij999000057 | 20.6 | 276.7 | 127 - 139 | 535.85 | 25.3  | C.CQPASCAPVYCHR.<br>I                  | Carbamidomethyl:<br>1, 6, 11           |
|                 |              |      |       | 140 - 147 | 555.72 | 43.2  | R.ICYHPTCC.C                           | Carbamidomethyl:                       |

|        |              |      |        |           |        |      |                              |                                         |
|--------|--------------|------|--------|-----------|--------|------|------------------------------|-----------------------------------------|
|        |              |      |        |           |        |      |                              | 2, 7, 8                                 |
|        |              |      |        | 168 - 177 | 671.23 | 72.6 | R.PVCCQTTCCR.T               | Carbamidomethyl:<br>3, 4, 8, 9          |
|        |              |      |        | 16 - 30   | 930.27 | 80   | R.TTCESSGCQPCC<br>PR.T       | Carbamidomethyl:<br>3, 4, 9, 12, 13     |
| KAP9.8 | gij999000074 | 17.8 | 212.1  | 103 - 115 | 535.85 | 25.3 | C.CQPASCAPVYCHR.<br>T        | Carbamidomethyl:<br>1, 6, 11            |
|        |              |      |        | 25 - 34   | 641.71 | 72.6 | R.PISCQTTCCR.T               | Carbamidomethyl:<br>4, 8, 9             |
|        |              |      |        | 144 - 153 | 671.23 | 72.6 | C.PVCCQTTCCR.T               | Carbamidomethyl:<br>3, 4, 8, 9          |
|        |              |      |        | 116 - 127 | 763.24 | 41.6 | R.TCYHPTCCCLPG.C             | Carbamidomethyl:<br>2, 7, 8, 9          |
| KAP4.9 | gij999000125 | 17.2 | 247.6  | 36 - 48   | 767.76 | 52.9 | R.TTCYRPSCGVSSC.<br>C        | Carbamidomethyl:<br>3, 8, 13            |
|        |              |      |        | 96 - 108  | 854.78 | 87.5 | R.CCQPVCCQPSCPR.<br>I        | Carbamidomethyl:<br>1, 2, 6, 7, 11      |
|        |              |      |        | 1 - 16    | 903.28 | 83.3 | -<br>.VSSCCGSVCSDQSC<br>GR.S | Carbamidomethyl:<br>4, 5, 9, 14         |
| K10    | gij999000082 | 56.3 | 367.8  | 211 - 217 | 404.23 | 49.7 | R.LAADDFR.M                  |                                         |
|        |              |      |        | 210 - 217 | 482.28 | 28.2 | A.RLAADDFR.M                 |                                         |
|        |              |      |        | 240 - 248 | 516.28 | 67.1 | R.VLDELTLTK.T                |                                         |
|        |              |      |        | 369 - 381 | 695.8  | 81.7 | K.QSLEASLAETEGR.Y            |                                         |
|        |              |      |        | 422 - 432 | 717.83 | 69.2 | K.IRLENEIQTYR.S              |                                         |
| K31    | gij164652864 | 46.8 | 4637.4 | 224 - 229 | 366.18 | 47.4 | R.VLNETR.A                   |                                         |
|        |              |      |        | 136 - 142 | 404.23 | 49.7 | K.LAADDFR.T                  |                                         |
|        |              |      |        | 323 - 329 | 408.74 | 50.9 | E.SQLAEIR.G                  |                                         |
|        |              |      |        | 67 - 73   | 412.23 | 53.8 | R.LASYLEK.V                  |                                         |
|        |              |      |        | 103 - 108 | 432.19 | 37.3 | N.YQSYFR.T                   |                                         |
|        |              |      |        | 192 - 202 | 443.21 | 31.8 | K.SNHEEEVNTLR.S              |                                         |
|        |              |      |        | 185 - 191 | 452.75 | 29.4 | K.EELICK.S                   | Carbamidomethyl: 5                      |
|        |              |      |        | 153 - 164 | 467.59 | 34.3 | R.QLVESDINGLRR.I             | Deamidated: 8                           |
|        |              |      |        | 80 - 87   | 474.23 | 43.4 | R.ENAELESR.I                 |                                         |
|        |              |      |        | 230 - 241 | 483.91 | 53.7 | R.AQYEALVETNRR.D             |                                         |
|        |              |      |        | 109 - 116 | 494.79 | 59.1 | R.TIEELQK.I                  |                                         |
|        |              |      |        | 127 - 135 | 500.34 | 71.6 | R.LVVQIDNAK.L                |                                         |
|        |              |      |        | 127 - 135 | 500.82 | 62.3 | R.LVVQIDNAK.L                | Deamidated: 7                           |
|        |              |      |        | 339 - 346 | 503.31 | 42.2 | E.YQVLLDVR.A                 |                                         |
|        |              |      |        | 358 - 366 | 518.77 | 32.2 | R.GLLDSEDCK.L                | Carbamidomethyl: 8                      |
|        |              |      |        | 229 - 241 | 535.98 | 28.9 | T.RAQYEALVETNRR.<br>D        |                                         |
|        |              |      |        | 67 - 75   | 539.83 | 83.7 | R.LASYLEKVR.Q                |                                         |
|        |              |      |        | 1 - 13    | 545.25 | 28.3 | -MSFNFLPNLSFR.S              | Carbamidomethyl:<br>6; Deamidated: 4    |
|        |              |      |        | 165 - 173 | 552.84 | 77.8 | R.ILDELTLCK.S                | Carbamidomethyl: 8                      |
|        |              |      |        | 242 - 249 | 555.25 | 52.5 | R.DVEEWYIR.Q                 |                                         |
|        |              |      |        | 405 - 413 | 556.74 | 73.2 | R.CGPCNSYVR.-                | Carbamidomethyl:<br>1, 4                |
|        |              |      |        | 405 - 413 | 557.24 | 63.7 | R.CGPCNSYVR.-                | Carbamidomethyl:<br>1, 4; Deamidated: 5 |
|        |              |      |        | 5 - 13    | 577.3  | 48.9 | N.FCLPNLSFR.S                | Carbamidomethyl: 2                      |
|        |              |      |        | 58 - 66   | 577.31 | 60.5 | K.ETMQFLNDR.L                |                                         |
|        |              |      |        | 126 - 135 | 578.36 | 40.6 | A.RLVVQIDNAK.L               |                                         |
|        |              |      |        | 58 - 66   | 585.27 | 31.9 | K.ETMQFLNDR.L                | Oxidation: 3                            |
|        |              |      |        | 349 - 357 | 599.27 | 61.8 | R.LECEINTYR.G                | Carbamidomethyl: 3                      |
|        |              |      |        | 284 - 293 | 604.27 | 37.2 | E.VELQAQHNL.R.D              |                                         |
|        |              |      |        | 143 - 152 | 605.29 | 68.2 | R.TKYETELGLR.Q               |                                         |

|  |  |  |  |           |         |       |                                 |                                   |
|--|--|--|--|-----------|---------|-------|---------------------------------|-----------------------------------|
|  |  |  |  | 174 - 184 | 609.82  | 81    | K.SDLEAQVESLK.E                 |                                   |
|  |  |  |  | 182 - 191 | 616.86  | 49.7  | E.SLKEELICLK.S                  | Carbamidomethyl: 8                |
|  |  |  |  | 164 - 173 | 630.85  | 45.6  | R.RILDELTLCK.S                  | Carbamidomethyl: 9                |
|  |  |  |  | 241 - 249 | 633.32  | 48.4  | R.RDVEEWYIR.Q                   |                                   |
|  |  |  |  | 4 - 13    | 634.35  | 39.8  | F.NFCLPNLSFR.S                  | Carbamidomethyl: 3                |
|  |  |  |  | 47 - 57   | 644.76  | 47.6  | W.FCEGSFNGNEK.E                 | Carbamidomethyl: 2                |
|  |  |  |  | 47 - 57   | 645.28  | 27    | W.FCEGSFNGNEK.E                 | Carbamidomethyl: 2; Deamidated: 7 |
|  |  |  |  | 230 - 240 | 647.31  | 94.8  | R.AQYEALVETNR.R                 |                                   |
|  |  |  |  | 230 - 240 | 647.8   | 70.7  | R.AQYEALVETNR.R                 | Deamidated: 2                     |
|  |  |  |  | 92 - 102  | 650.26  | 46.3  | R.SQQQEPLVCPN.Y                 | Carbamidomethyl: 9                |
|  |  |  |  | 277 - 293 | 664.35  | 44    | R.RTVNALEVELQAQH<br>NLR.D       |                                   |
|  |  |  |  | 283 - 293 | 668.82  | 49.1  | L.EVELQAQHNLR.D                 |                                   |
|  |  |  |  | 295 - 306 | 682.32  | 79.3  | D.SLENTLTETEAR.Y                |                                   |
|  |  |  |  | 153 - 164 | 700.37  | 42.8  | R.QLVESDINGLRR.I                |                                   |
|  |  |  |  | 152 - 163 | 700.85  | 40.1  | L.RQLVESDINGLR.R                | Deamidated: 9                     |
|  |  |  |  | 347 - 357 | 712.8   | 76.9  | R.ARLECEINTYR.G                 | Carbamidomethyl: 5                |
|  |  |  |  | 229 - 240 | 725.35  | 39.9  | T.RAQYEALVETNR.R                |                                   |
|  |  |  |  | 230 - 241 | 725.86  | 39    | R.AQYEALVETNRR.D                | Deamidated: 10                    |
|  |  |  |  | 230 - 241 | 725.88  | 26.3  | R.AQYEALVETNRR.D                | Deamidated: 2                     |
|  |  |  |  | 180 - 191 | 730.92  | 73.7  | Q.VESLKEELICLK.S                | Carbamidomethyl: 10               |
|  |  |  |  | 294 - 306 | 739.84  | 98.7  | R.DSLENTLTETEAR.Y               |                                   |
|  |  |  |  | 294 - 306 | 740.3   | 93.1  | R.DSLENTLTETEAR.Y               | Deamidated: 5                     |
|  |  |  |  | 2 - 13    | 751.36  | 66.1  | M.SFNFCLPNLSFR.S                | Carbamidomethyl: 5                |
|  |  |  |  | 2 - 13    | 751.85  | 36.7  | M.SFNFCLPNLSFR.S                | Carbamidomethyl: 5; Deamidated: 3 |
|  |  |  |  | 335 - 346 | 752.91  | 100.2 | R.QNQEQVLLDVR.A                 |                                   |
|  |  |  |  | 335 - 346 | 753.37  | 41    | R.QNQEQVLLDVR.A                 | Deamidated: 3                     |
|  |  |  |  | 281 - 293 | 760.92  | 94.7  | N.ALEVELQAQHNLR.<br>D           |                                   |
|  |  |  |  | 367 - 380 | 782.29  | 85.9  | K.LPCNPCATTNACGK<br>.T          | Carbamidomethyl: 3, 6, 12         |
|  |  |  |  | 109 - 121 | 787.41  | 71    | R.TIEELQKILCAK.S                | Carbamidomethyl: 11               |
|  |  |  |  | 381 - 402 | 805.04  | 62.9  | K.TITPCISSPCAPAAP<br>CTPCVPR.S  | Carbamidomethyl: 5, 10, 16, 19    |
|  |  |  |  | 209 - 223 | 813.4   | 97.7  | R.LNVEVDAAPTVDLN<br>R.V         |                                   |
|  |  |  |  | 202 - 223 | 813.41  | 42.6  | L.RSQLGDRLNVEVDA<br>APTVDLNR.V  |                                   |
|  |  |  |  | 209 - 223 | 813.89  | 45.9  | R.LNVEVDAAPTVDLN<br>R.V         | Deamidated: 2                     |
|  |  |  |  | 257 - 277 | 830.74  | 34.1  | K.QVVSSEQLQSCQ<br>TEIILRR.T     | Carbamidomethyl: 12               |
|  |  |  |  | 358 - 380 | 861     | 104.2 | R.GLLDSEDCKLPCNP<br>CATTNACGK.T | Carbamidomethyl: 8, 12, 15, 21    |
|  |  |  |  | 307 - 329 | 893.76  | 46.5  | R.YSCQLNQVQSLISN<br>VESQLAEIR.G | Carbamidomethyl: 3                |
|  |  |  |  | 278 - 293 | 917.98  | 138.5 | R.TVNALEVELQAQHN<br>LR.D        |                                   |
|  |  |  |  | 278 - 293 | 918.46  | 122.2 | R.TVNALEVELQAQHN<br>LR.D        | Deamidated: 10                    |
|  |  |  |  | 278 - 293 | 918.48  | 99.6  | R.TVNALEVELQAQHN<br>LR.D        | Deamidated: 3                     |
|  |  |  |  | 386 - 402 | 920.86  | 60.6  | C.ISSPCAPAAPCTPC<br>VPR.S       | Carbamidomethyl: 5, 11, 14        |
|  |  |  |  | 174 - 191 | 1052.55 | 102.5 | K.SDLEAQVESLKEELI<br>CLK.S      | Carbamidomethyl: 16               |

|     |              |      |        |           |         |      |                              |                                       |
|-----|--------------|------|--------|-----------|---------|------|------------------------------|---------------------------------------|
|     |              |      |        | 174 - 191 | 1053.03 | 63.9 | K.SDLEAQVESLKEELI<br>CLK.S   | Carbamidomethyl:<br>16; Deamidated: 6 |
|     |              |      |        | 92 - 108  | 1072.43 | 77.8 | R.SQQQEPLVCPNYQ<br>SYFR.T    | Carbamidomethyl: 9                    |
|     |              |      |        | 92 - 108  | 1073    | 45.1 | R.SQQQEPLVCPNYQ<br>SYFR.T    | Carbamidomethyl:<br>9; Deamidated: 2  |
| K34 | gil309323371 | 46.6 | 3850.2 | 240 - 245 | 366.18  | 47.4 | R.VLNETR.A                   |                                       |
|     |              |      |        | 339 - 345 | 408.74  | 50.9 | E.SQLAEIR.S                  |                                       |
|     |              |      |        | 152 - 158 | 412.22  | 50.5 | K.LASDDFR.T                  |                                       |
|     |              |      |        | 83 - 89   | 412.23  | 53.8 | R.LASYLEK.V                  |                                       |
|     |              |      |        | 119 - 124 | 432.19  | 37.3 | N.YQSYFR.T                   |                                       |
|     |              |      |        | 208 - 218 | 442.9   | 34.8 | K.KNHEEEANSLR.S              |                                       |
|     |              |      |        | 201 - 207 | 452.75  | 29.4 | K.EELLCLK.K                  | Carbamidomethyl: 5                    |
|     |              |      |        | 198 - 208 | 454.29  | 27.6 | E.SLKEELLCLK.K.N             | Carbamidomethyl: 8                    |
|     |              |      |        | 96 - 103  | 474.23  | 43.4 | R.ENAEESR.I                  |                                       |
|     |              |      |        | 246 - 257 | 483.91  | 53.7 | R.AQYEALVETNRR.D             |                                       |
|     |              |      |        | 125 - 132 | 494.79  | 59.1 | R.TIEELQQK.I                 |                                       |
|     |              |      |        | 143 - 151 | 507.32  | 67.1 | R.LVIQIDNAK.L                |                                       |
|     |              |      |        | 245 - 257 | 535.98  | 28.9 | T.RAQYEALVETNRR.<br>D        |                                       |
|     |              |      |        | 83 - 91   | 539.83  | 83.7 | R.LASYLEKVR.Q                |                                       |
|     |              |      |        | 181 - 189 | 552.84  | 77.8 | R.ILDELTLCK.S                | Carbamidomethyl: 8                    |
|     |              |      |        | 258 - 265 | 555.25  | 52.5 | R.DVEEWYIR.Q                 |                                       |
|     |              |      |        | 365 - 373 | 562.78  | 62   | R.LESEINTYR.G                |                                       |
|     |              |      |        | 74 - 82   | 577.31  | 60.5 | K.ETMQFLNDR.L                |                                       |
|     |              |      |        | 74 - 82   | 585.27  | 31.9 | K.ETMQFLNDR.L                | Oxidation: 3                          |
|     |              |      |        | 365 - 374 | 591.26  | 61.1 | R.LESEINTYRG.L               |                                       |
|     |              |      |        | 209 - 218 | 599.76  | 39.1 | K.NHEEEANSLR.S               |                                       |
|     |              |      |        | 300 - 309 | 604.27  | 37.2 | E.VELQAQHNL.R.D              |                                       |
|     |              |      |        | 190 - 200 | 609.82  | 81   | K.SDLEAQVESLK.E              |                                       |
|     |              |      |        | 198 - 207 | 616.86  | 49.7 | E.SLKEELLCLK.K               | Carbamidomethyl: 8                    |
|     |              |      |        | 180 - 189 | 630.85  | 45.6 | R.RILDELTLCK.S               | Carbamidomethyl: 9                    |
|     |              |      |        | 257 - 265 | 633.32  | 48.4 | R.RDVEEWYIR.Q                |                                       |
|     |              |      |        | 63 - 73   | 644.76  | 47.6 | W.FCEGSFNGNEK.E              | Carbamidomethyl: 2                    |
|     |              |      |        | 63 - 73   | 645.28  | 27   | W.FCEGSFNGNEK.E              | Carbamidomethyl:<br>2; Deamidated: 7  |
|     |              |      |        | 246 - 256 | 647.31  | 94.8 | R.AQYEALVETNR.R              |                                       |
|     |              |      |        | 246 - 256 | 647.8   | 70.7 | R.AQYEALVETNR.R              | Deamidated: 2                         |
|     |              |      |        | 293 - 309 | 664.35  | 44   | R.RTVNALEVELQAQH<br>NLR.D    |                                       |
|     |              |      |        | 299 - 309 | 668.82  | 49.1 | L.EVELQAQHNL.R.D             |                                       |
|     |              |      |        | 363 - 373 | 676.31  | 65.3 | K.ARLESEINTYR.G              |                                       |
|     |              |      |        | 311 - 322 | 682.32  | 79.3 | D.SLENTLTETEAR.Y             |                                       |
|     |              |      |        | 245 - 256 | 725.35  | 39.9 | T.RAQYEALVETNR.R             |                                       |
|     |              |      |        | 246 - 257 | 725.86  | 39   | R.AQYEALVETNRR.D             | Deamidated: 10                        |
|     |              |      |        | 246 - 257 | 725.88  | 26.3 | R.AQYEALVETNRR.D             | Deamidated: 2                         |
|     |              |      |        | 196 - 207 | 730.92  | 73.7 | Q.VESLKEELLCLK.K             | Carbamidomethyl:<br>10                |
|     |              |      |        | 351 - 362 | 738.93  | 31.1 | R.QNQEYQVLLDVK.A             |                                       |
|     |              |      |        | 310 - 322 | 739.84  | 98.7 | R.DSLENTLTETEAR.Y            |                                       |
|     |              |      |        | 310 - 322 | 740.3   | 93.1 | R.DSLENTLTETEAR.Y            | Deamidated: 5                         |
|     |              |      |        | 190 - 208 | 744.77  | 40.3 | K.SDLEAQVESLKEEL<br>LCLK.K.N | Carbamidomethyl:<br>16                |
|     |              |      |        | 297 - 309 | 760.92  | 94.7 | N.ALEVELQAQHNL.R.<br>D       |                                       |
|     |              |      |        | 125 - 137 | 787.41  | 71   | R.TIEELQQKILCAK.S            | Carbamidomethyl:                      |

|     |              |      |       |           |         |       |                                     |                                                   |
|-----|--------------|------|-------|-----------|---------|-------|-------------------------------------|---------------------------------------------------|
|     |              |      |       |           |         |       |                                     | 11                                                |
|     |              |      |       | 225 - 239 | 813.4   | 97.7  | R.LNVEVDAAPTVDLN<br>R.V             |                                                   |
|     |              |      |       | 218 - 239 | 813.41  | 42.6  | L.RSQLGDRLNVEVDA<br>APTVDLNR.V      |                                                   |
|     |              |      |       | 225 - 239 | 813.89  | 45.9  | R.LNVEVDAAPTVDLN<br>R.V             | Deamidated: 2                                     |
|     |              |      |       | 273 - 293 | 821.76  | 62.8  | K.QVVSSEQLQSYQ<br>AEIILRR.T         |                                                   |
|     |              |      |       | 273 - 293 | 822.08  | 26.9  | K.QVVSSEQLQSYQ<br>AEIILRR.T         | Deamidated: 1                                     |
|     |              |      |       | 294 - 309 | 917.98  | 138.5 | R.TVNALEVELQAQHN<br>LR.D            |                                                   |
|     |              |      |       | 294 - 309 | 918.46  | 122.2 | R.TVNALEVELQAQHN<br>LR.D            | Deamidated: 10                                    |
|     |              |      |       | 294 - 309 | 918.48  | 99.6  | R.TVNALEVELQAQHN<br>LR.D            | Deamidated: 3                                     |
|     |              |      |       | 374 - 399 | 947.72  | 70.6  | R.GLLDSEDSKLPSPNP<br>CATTNASSNFCR.S | Carbamidomethyl:<br>15, 25                        |
|     |              |      |       | 374 - 399 | 948.42  | 38    | R.GLLDSEDSKLPSPNP<br>CATTNASSNFCR.S | Carbamidomethyl:<br>15, 25; Deamidated:<br>13, 19 |
|     |              |      |       | 383 - 399 | 948.88  | 127.4 | K.LPSNPCATTNASSN<br>FCR.S           | Carbamidomethyl:<br>6, 16                         |
|     |              |      |       | 190 - 207 | 1052.55 | 102.5 | K.SDLEAQVESLKEEL<br>LCLK.K          | Carbamidomethyl:<br>16                            |
|     |              |      |       | 190 - 207 | 1053.03 | 63.9  | K.SDLEAQVESLKEEL<br>LCLK.K          | Carbamidomethyl:<br>16; Deamidated: 6             |
|     |              |      |       | 108 - 124 | 1079.47 | 98.3  | R.SQQQEPLLCPNYQ<br>SYFR.T           | Carbamidomethyl: 9                                |
|     |              |      |       | 273 - 292 | 1154.08 | 111   | K.QVVSSEQLQSYQ<br>AEIILR.R          |                                                   |
| K75 | gij999000081 | 58.8 | 459.2 | 155 - 161 | 414.23  | 46.7  | K.FASFIDK.V                         |                                                   |
|     |              |      |       | 164 - 170 | 453.78  | 42.3  | R.FLEQQNK.V                         |                                                   |
|     |              |      |       | 242 - 252 | 596.84  | 78.1  | R.TAAENEFVALK.N                     |                                                   |
|     |              |      |       | 242 - 252 | 597.33  | 43.2  | R.TAAENEFVALK.N                     | Deamidated: 5                                     |
|     |              |      |       | 308 - 319 | 651.9   | 76.2  | R.SLDLDSIIAEVK.A                    |                                                   |
|     |              |      |       | 385 - 396 | 665.32  | 36.1  | A.NLQTAIAADAEQR.G                   |                                                   |
| K83 | gij312283588 | 53.9 | 5520  | 316 - 321 | 356.72  | 38.1  | R.HGETLR.R                          |                                                   |
|     |              |      |       | 39 - 44   | 378.16  | 27.1  | R.GISCYR.G                          | Carbamidomethyl: 4                                |
|     |              |      |       | 122 - 128 | 406.27  | 47.9  | R.FAAFIDK.V                         |                                                   |
|     |              |      |       | 45 - 53   | 426.24  | 60    | R.GLTGGFGSR.S                       |                                                   |
|     |              |      |       | 187 - 197 | 443.94  | 28.1  | N.HVQEVLEGYKK.K                     |                                                   |
|     |              |      |       | 131 - 137 | 453.78  | 42.3  | R.FLEQQNK.L                         |                                                   |
|     |              |      |       | 402 - 413 | 473.95  | 58.5  | K.LGLDIEIATYRR.L                    |                                                   |
|     |              |      |       | 247 - 253 | 476.27  | 49.4  | R.LYEEEEIR.V                        |                                                   |
|     |              |      |       | 143 - 149 | 476.77  | 39.3  | K.LQFFQNR.Q                         |                                                   |
|     |              |      |       | 143 - 149 | 477.26  | 45    | K.LQFFQNR.Q                         | Deamidated: 6                                     |
|     |              |      |       | 143 - 149 | 477.26  | 52.7  | K.LQFFQNR.Q                         | Deamidated: 2                                     |
|     |              |      |       | 6 - 15    | 477.7   | 32.1  | F.STVGSFGSR.A                       |                                                   |
|     |              |      |       | 259 - 267 | 481.28  | 75.2  | N.ISDTSVIVK.M                       |                                                   |
|     |              |      |       | 414 - 421 | 487.25  | 73.4  | R.LLEGEEQR.L                        |                                                   |
|     |              |      |       | 337 - 345 | 487.76  | 52.8  | R.LTAEVENAK.C                       |                                                   |
|     |              |      |       | 131 - 142 | 497.6   | 34.2  | R.FLEQQNKLLETK.L                    |                                                   |
|     |              |      |       | 385 - 392 | 497.75  | 62.4  | K.QDMACLK.E                         | Carbamidomethyl:<br>5; Oxidation: 3               |
|     |              |      |       | 219 - 226 | 499.22  | 55.4  | K.DVDCAYVR.K                        | Carbamidomethyl: 4                                |
|     |              |      |       | 199 - 206 | 504.79  | 49.6  | K.YEEEEVALR.A                       |                                                   |
|     |              |      |       | 296 - 303 | 506.26  | 48.2  | R.AEASWYR.S                         |                                                   |

|  |  |  |  |           |        |       |                             |                                     |
|--|--|--|--|-----------|--------|-------|-----------------------------|-------------------------------------|
|  |  |  |  | 16 - 29   | 507.89 | 38    | R.AFSCVSACGPRPG<br>R.C      | Carbamidomethyl:<br>4, 8            |
|  |  |  |  | 325 - 332 | 508.76 | 36    | K.EEINELNR.V                |                                     |
|  |  |  |  | 285 - 293 | 519.76 | 74.3  | K.AQYDDIASR.S               |                                     |
|  |  |  |  | 122 - 130 | 533.82 | 69.7  | R.FAAFIDKVR.F               |                                     |
|  |  |  |  | 373 - 382 | 536.33 | 87.2  | K.LAGLEELQK.A               |                                     |
|  |  |  |  | 414 - 422 | 543.82 | 35.2  | R.LLEGEEQRL.C               |                                     |
|  |  |  |  | 246 - 253 | 554.31 | 49.8  | R.RLYEEEEIR.V               |                                     |
|  |  |  |  | 30 - 38   | 556.23 | 66.8  | R.CCITAAPYR.G               | Carbamidomethyl:<br>1, 2            |
|  |  |  |  | 218 - 226 | 563.23 | 62.7  | K.KDVDCAYVR.K               | Carbamidomethyl: 5                  |
|  |  |  |  | 393 - 401 | 564.27 | 39.2  | K.EYQEVMSK.L                |                                     |
|  |  |  |  | 413 - 421 | 565.29 | 43    | R.RLLEGEEQR.L               |                                     |
|  |  |  |  | 336 - 345 | 565.76 | 38.9  | Q.RLTAEVENAK.C              |                                     |
|  |  |  |  | 198 - 206 | 568.82 | 76.5  | K.KYEEVALR.A                |                                     |
|  |  |  |  | 4 - 15    | 579.77 | 82.8  | C.GFSTVSGFGSR.A             |                                     |
|  |  |  |  | 383 - 392 | 589.3  | 63.3  | K.AKQDMACLK.E               | Carbamidomethyl: 7                  |
|  |  |  |  | 207 - 217 | 596.84 | 78.1  | R.ATAENEFVALK.K             |                                     |
|  |  |  |  | 383 - 392 | 597.3  | 64.2  | K.AKQDMACLK.E               | Carbamidomethyl:<br>7; Oxidation: 5 |
|  |  |  |  | 207 - 217 | 597.33 | 43.2  | R.ATAENEFVALK.K             | Deamidated: 5                       |
|  |  |  |  | 372 - 382 | 600.37 | 90.3  | C.KLAGLEELQK.A              |                                     |
|  |  |  |  | 16 - 26   | 606.24 | 73.6  | R.AFSCVSACGPR.P             | Carbamidomethyl:<br>4, 8            |
|  |  |  |  | 306 - 315 | 609.83 | 44.5  | K.CEEIKATVIR.H              | Carbamidomethyl: 1                  |
|  |  |  |  | 170 - 180 | 611.73 | 87.3  | R.EAECVEADSGR.L             | Carbamidomethyl: 4                  |
|  |  |  |  | 323 - 332 | 623.32 | 74    | R.TKEEINELNR.V              |                                     |
|  |  |  |  | 323 - 332 | 623.8  | 59.4  | R.TKEEINELNR.V              | Deamidated: 6                       |
|  |  |  |  | 294 - 303 | 627.77 | 69.5  | R.SRAEESWYR.S               |                                     |
|  |  |  |  | 402 - 412 | 632.39 | 93.5  | K.LGLDIEIATYR.R             |                                     |
|  |  |  |  | 197 - 206 | 632.84 | 65    | K.KKYEEVALR.A               |                                     |
|  |  |  |  | 373 - 384 | 635.82 | 79.5  | K.LAGLEELQKAK.Q             |                                     |
|  |  |  |  | 181 - 197 | 658.31 | 50.1  | R.LSSELNHVQEVLEG<br>YKK.K   |                                     |
|  |  |  |  | 181 - 197 | 658.69 | 42.1  | R.LSSELNHVQEVLEG<br>YKK.K   | Deamidated: 6                       |
|  |  |  |  | 3 - 15    | 659.8  | 65.7  | T.CGFSTVSGFGSR.<br>A        | Carbamidomethyl: 1                  |
|  |  |  |  | 207 - 218 | 660.81 | 87.2  | R.ATAENEFVALKK.D            |                                     |
|  |  |  |  | 207 - 218 | 661.35 | 74.2  | R.ATAENEFVALKK.D            | Deamidated: 5                       |
|  |  |  |  | 371 - 382 | 680.36 | 75    | R.CKLAGLEELQK.A             | Carbamidomethyl: 1                  |
|  |  |  |  | 97 - 108  | 700.86 | 51.6  | L.NLEIDPNAQCVK.Q            | Carbamidomethyl:<br>10              |
|  |  |  |  | 322 - 332 | 701.33 | 61.2  | R.RTKEEINELNR.V             |                                     |
|  |  |  |  | 254 - 272 | 702.69 | 26.8  | R.VLQANISDTSVIVKM<br>DNSR.D | Oxidation: 15                       |
|  |  |  |  | 2 - 15    | 710.32 | 115.3 | M.TCGFSTVSGFGS<br>R.A       | Carbamidomethyl: 2                  |
|  |  |  |  | 273 - 284 | 710.84 | 83.7  | R.DLNMDCIVAEIK.A            | Carbamidomethyl: 6                  |
|  |  |  |  | 438 - 451 | 711.76 | 100.3 | R.GGVVCGDLCVSGS<br>R.P      | Carbamidomethyl:<br>5, 9            |
|  |  |  |  | 273 - 284 | 718.81 | 44.4  | R.DLNMDCIVAEIK.A            | Carbamidomethyl:<br>6; Oxidation: 4 |
|  |  |  |  | 227 - 245 | 731.39 | 37.1  | R.KSDLEANSEALIQEI<br>DFLR.R | Deamidated: 13                      |
|  |  |  |  | 228 - 246 | 740.34 | 28.3  | K.SDLEANSEALIQEID<br>FLRR.L |                                     |
|  |  |  |  | 254 - 267 | 743.91 | 110.9 | R.VLQANISDTSVIVK.           |                                     |

|     |              |      |        |           |         |       |                              |                                         |
|-----|--------------|------|--------|-----------|---------|-------|------------------------------|-----------------------------------------|
|     |              |      |        |           |         |       | M                            |                                         |
|     |              |      |        | 254 - 267 | 744.4   | 37.2  | R.VLQANISDTSVIVK.M           | Deamidated: 3                           |
|     |              |      |        | 131 - 142 | 746.4   | 39.2  | R.FLEQQNKLLLETK.L            | Deamidated: 6                           |
|     |              |      |        | 138 - 149 | 768.91  | 86    | K.LLETKLQFFQNR.Q             |                                         |
|     |              |      |        | 227 - 246 | 783.09  | 58    | R.KSDLEANSEALIQEI<br>DFLRR.L |                                         |
|     |              |      |        | 337 - 350 | 796.36  | 74.9  | R.LTAEVENAKCQNSK<br>.L       | Carbamidomethyl:<br>10                  |
|     |              |      |        | 149 - 168 | 838.68  | 93.6  | N.RQCCESNLEPLFEG<br>YIETLR.R | Carbamidomethyl:<br>3, 4                |
|     |              |      |        | 150 - 169 | 838.69  | 51.2  | R.QCCESNLEPLFEGY<br>IETLRR.E | Carbamidomethyl:<br>2, 3                |
|     |              |      |        | 422 - 437 | 847.35  | 132   | R.LCEGVGAVNVCVS<br>SSR.G     | Carbamidomethyl:<br>2, 11               |
|     |              |      |        | 181 - 196 | 922.92  | 81.2  | R.LSSELNHVQEVLEG<br>YK.K     |                                         |
|     |              |      |        | 181 - 196 | 923.48  | 46.6  | R.LSSELNHVQEVLEG<br>YK.K     | Deamidated: 6                           |
|     |              |      |        | 91 - 108  | 1013    | 65.2  | E.SLLTPLNLEIDPNAQ<br>CVK.Q   | Carbamidomethyl:<br>16                  |
|     |              |      |        | 228 - 245 | 1032.01 | 98.5  | K.SDLEANSEALIQEID<br>FLR.R   |                                         |
|     |              |      |        | 228 - 245 | 1032.48 | 54.3  | K.SDLEANSEALIQEID<br>FLR.R   | Deamidated: 6                           |
|     |              |      |        | 351 - 370 | 1056.99 | 124.6 | K.LEAAVTQAEQQGEV<br>ALNDAR.C |                                         |
|     |              |      |        | 351 - 370 | 1057.49 | 51.4  | K.LEAAVTQAEQQGEV<br>ALNDAR.C | Deamidated: 7                           |
|     |              |      |        | 227 - 245 | 1096.52 | 69.6  | R.KSDLEANSEALIQEI<br>DFLR.R  | Deamidated: 7                           |
|     |              |      |        | 150 - 168 | 1179.55 | 110.5 | R.QCCESNLEPLFEGY<br>IETLR.R  | Carbamidomethyl:<br>2, 3                |
|     |              |      |        | 150 - 168 | 1180.08 | 77.6  | R.QCCESNLEPLFEGY<br>IETLR.R  | Carbamidomethyl:<br>2, 3; Deamidated: 1 |
| K85 | gij164652870 | 56.3 | 4043.7 | 166 - 171 | 356.72  | 38.1  | R.HGETLR.R                   |                                         |
|     |              |      |        | 37 - 47   | 443.94  | 28.1  | N.HVQEVLEGYKK.K              |                                         |
|     |              |      |        | 252 - 263 | 473.95  | 58.5  | K.LGLDIEIATYRR.L             |                                         |
|     |              |      |        | 109 - 117 | 481.28  | 75.2  | H.ISDTSVIVK.M                |                                         |
|     |              |      |        | 264 - 271 | 487.25  | 73.4  | R.LLEGEEQR.L                 |                                         |
|     |              |      |        | 187 - 195 | 494.8   | 56    | R.LTAEIENAK.C                |                                         |
|     |              |      |        | 235 - 242 | 497.75  | 62.4  | K.QDMACLLK.E                 | Carbamidomethyl:<br>5; Oxidation: 3     |
|     |              |      |        | 49 - 56   | 504.79  | 49.6  | K.YEEVALR.A                  |                                         |
|     |              |      |        | 69 - 76   | 506.23  | 43.4  | K.DVDCAYL.R.K                | Carbamidomethyl: 4                      |
|     |              |      |        | 146 - 153 | 506.26  | 48.2  | R.AEAESWYR.S                 |                                         |
|     |              |      |        | 175 - 182 | 508.76  | 36    | K.EEINELNR.V                 |                                         |
|     |              |      |        | 135 - 143 | 519.76  | 74.3  | K.AQYDDIASR.S                |                                         |
|     |              |      |        | 328 - 337 | 523.15  | 62.8  | R.ASSFSCGSSR.S               | Carbamidomethyl: 6                      |
|     |              |      |        | 223 - 232 | 536.33  | 87.2  | K.LAGLEEALQK.A               |                                         |
|     |              |      |        | 264 - 272 | 543.82  | 35.2  | R.LLEGEEQRL.C                |                                         |
|     |              |      |        | 243 - 251 | 564.27  | 39.2  | K.EYQEVMSK.L                 |                                         |
|     |              |      |        | 263 - 271 | 565.29  | 43    | R.RLLEGEEQR.L                |                                         |
|     |              |      |        | 48 - 56   | 568.82  | 76.5  | K.KYEEVALR.A                 |                                         |
|     |              |      |        | 68 - 76   | 570.29  | 72.5  | K.KDVDCAYLR.K                | Carbamidomethyl: 5                      |
|     |              |      |        | 233 - 242 | 589.3   | 63.3  | K.AKQDMACLLK.E               | Carbamidomethyl: 7                      |
|     |              |      |        | 233 - 242 | 597.3   | 64.2  | K.AKQDMACLLK.E               | Carbamidomethyl:<br>7; Oxidation: 5     |
|     |              |      |        | 20 - 30   | 600.22  | 26    | R.EAEHVEADSGR.L              |                                         |

|      |              |     |       |           |         |       |                                  |                                             |
|------|--------------|-----|-------|-----------|---------|-------|----------------------------------|---------------------------------------------|
|      |              |     |       | 222 - 232 | 600.37  | 90.3  | S.KLAGLEELQK.A                   |                                             |
|      |              |     |       | 57 - 67   | 610.85  | 78.2  | R.ATAENEFVVLK.K                  |                                             |
|      |              |     |       | 173 - 182 | 623.32  | 74    | R.TKEEINELNR.V                   |                                             |
|      |              |     |       | 173 - 182 | 623.8   | 59.4  | R.TKEEINELNR.V                   | Deamidated: 6                               |
|      |              |     |       | 144 - 153 | 627.77  | 69.5  | R.SRAEAESWYR.S                   |                                             |
|      |              |     |       | 252 - 262 | 632.39  | 93.5  | K.LGLDIEIATYR.R                  |                                             |
|      |              |     |       | 47 - 56   | 632.84  | 65    | K.KKYEEEEVALR.A                  |                                             |
|      |              |     |       | 223 - 234 | 635.82  | 79.5  | K.LAGLEELQKAK.Q                  |                                             |
|      |              |     |       | 106 - 117 | 642.32  | 44.1  | L.NAHISDTSVIVK.M                 |                                             |
|      |              |     |       | 221 - 232 | 643.88  | 105.8 | R.SKLAGLEELQK.A                  |                                             |
|      |              |     |       | 31 - 47   | 653     | 40.3  | R.LASELNHVQEVLEG<br>YKK.K        |                                             |
|      |              |     |       | 31 - 47   | 653.35  | 38.3  | R.LASELNHVQEVLEG<br>YKK.K        | Deamidated: 9                               |
|      |              |     |       | 57 - 68   | 674.86  | 81.2  | R.ATAENEFVVLK.D                  |                                             |
|      |              |     |       | 201 - 220 | 686.38  | 26.8  | K.LEAAVAEAEQQGEA<br>ALNDAR.S     | Deamidated: 11                              |
|      |              |     |       | 172 - 182 | 701.33  | 61.2  | R.RTKEEINELNR.V                  |                                             |
|      |              |     |       | 123 - 134 | 703.86  | 74.4  | R.DLNMDCVVAEIK.A                 | Carbamidomethyl: 6                          |
|      |              |     |       | 104 - 117 | 755.88  | 34.2  | Q.ILNAHISDTSVIVK.M               | Deamidated: 3                               |
|      |              |     |       | 288 - 303 | 757.3   | 103.3 | R.GGVACGGLTYSS<br>AGR.Q          | Carbamidomethyl: 5                          |
|      |              |     |       | 199 - 220 | 762.69  | 70.1  | R.TKLEAAVAEAEQQG<br>EAALNDAR.S   | Deamidated: 12                              |
|      |              |     |       | 77 - 96   | 764.43  | 101.2 | R.KSDLEANVEALVEE<br>SNFLKR.L     |                                             |
|      |              |     |       | 1 - 19    | 791.36  | 39    | -<br>.CCESNLEPLFNGYIET<br>LRR.E  | Carbamidomethyl:<br>1, 2; Deamidated:<br>11 |
|      |              |     |       | 304 - 327 | 794.72  | 71.6  | R.QIASGPVATGGSITV<br>LAPDSCQPR.A | Carbamidomethyl:<br>21                      |
|      |              |     |       | 97 - 117  | 800.79  | 95.4  | R.LYDEEIQILNAHISDT<br>SVIVK.M    |                                             |
|      |              |     |       | 97 - 117  | 801.08  | 31.8  | R.LYDEEIQILNAHISDT<br>SVIVK.M    | Deamidated: 7                               |
|      |              |     |       | 272 - 287 | 855.36  | 131.9 | R.LCEGVGSVNVCVS<br>SSR.G         | Carbamidomethyl:<br>2, 11                   |
|      |              |     |       | 272 - 287 | 855.89  | 30.3  | R.LCEGVGSVNVCVS<br>SSR.G         | Carbamidomethyl:<br>2, 11; Deamidated:<br>9 |
|      |              |     |       | 31 - 46   | 914.95  | 109.6 | R.LASELNHVQEVLEG<br>YK.K         |                                             |
|      |              |     |       | 78 - 95   | 1004    | 127.5 | K.SDLEANVEALVEES<br>NFLK.R       |                                             |
|      |              |     |       | 201 - 220 | 1028.48 | 151.3 | K.LEAAVAEAEQQGEA<br>ALNDAR.S     |                                             |
|      |              |     |       | 77 - 95   | 1068.03 | 86.1  | R.KSDLEANVEALVEE<br>SNFLK.R      |                                             |
|      |              |     |       | 78 - 96   | 1082.03 | 43.4  | K.SDLEANVEALVEES<br>NFLKR.L      |                                             |
|      |              |     |       | 199 - 220 | 1143.02 | 172.8 | R.TKLEAAVAEAEQQG<br>EAALNDAR.S   |                                             |
|      |              |     |       | 199 - 220 | 1143.54 | 83.6  | R.TKLEAAVAEAEQQG<br>EAALNDAR.S   | Deamidated: 19                              |
| KAP7 | gil224555962 | 8.8 | 214.6 | 4 - 23    | 822.01  | 72.6  | R.FFCCGSYFPGYPSY<br>GTNFHR.T     | Carbamidomethyl:<br>3, 4                    |
|      |              |     |       | 4 - 23    | 822.36  | 31.6  | R.FFCCGSYFPGYPSY<br>GTNFHR.T     | Carbamidomethyl:<br>3, 4; Deamidated:<br>17 |
|      |              |     |       | 27 - 43   | 857.91  | 31.5  | R.ATPLNCVVPLGSPL<br>GYG.C        | Carbamidomethyl: 6                          |
|      |              |     |       | 2 - 23    | 907.69  | 78.8  | M.TRFFCCGSYFPGY                  | Carbamidomethyl:                            |



|                              |              |      |        |           |         |       |                                   |                                 |
|------------------------------|--------------|------|--------|-----------|---------|-------|-----------------------------------|---------------------------------|
|                              |              |      |        |           |         |       | PSYGTNFHR.T                       | 5, 6                            |
| KAP3.2                       | gij229307    | 10.3 | 210.2  | 12 - 26   | 567.6   | 53.5  | R.TGPATTICSSDKFC<br>R.C           | Carbamidomethyl:<br>8, 14       |
|                              |              |      |        | 12 - 23   | 619.27  | 83.7  | R.TGPATTICSSDK.F                  | Carbamidomethyl: 8              |
|                              |              |      |        | 12 - 24   | 692.8   | 73    | R.TGPATTICSSDKF.C                 | Carbamidomethyl: 8              |
| K35                          | gij168693435 | 49.7 | 2373.7 | 177 - 183 | 404.23  | 49.7  | K.LAADDFR.T                       |                                 |
|                              |              |      |        | 364 - 370 | 408.74  | 50.9  | E.SQLAEIR.C                       |                                 |
|                              |              |      |        | 108 - 114 | 412.23  | 53.8  | R.LASYLEK.V                       |                                 |
|                              |              |      |        | 8 - 16    | 442.23  | 40.6  | K.ASFSSGSLK.V                     |                                 |
|                              |              |      |        | 226 - 232 | 452.75  | 29.4  | K.EELLCLK.K                       | Carbamidomethyl: 5              |
|                              |              |      |        | 223 - 233 | 454.29  | 27.6  | E.SLKEELLCLK.K.N                  | Carbamidomethyl: 8              |
|                              |              |      |        | 121 - 128 | 474.23  | 43.4  | R.ENAEESR.I                       |                                 |
|                              |              |      |        | 168 - 176 | 500.34  | 71.6  | R.LVVQIDNAK.L                     |                                 |
|                              |              |      |        | 168 - 176 | 500.82  | 62.3  | R.LVVQIDNAK.L                     | Deamidated: 7                   |
|                              |              |      |        | 380 - 387 | 503.31  | 42.2  | E.YQVLLDVR.A                      |                                 |
|                              |              |      |        | 399 - 407 | 518.77  | 32.2  | R.GLLDSEDCK.L                     | Carbamidomethyl: 8              |
|                              |              |      |        | 408 - 421 | 527.23  | 40.8  | K.LPCNPCAPDHSPSK<br>.S            | Carbamidomethyl:<br>3, 6        |
|                              |              |      |        | 108 - 116 | 539.83  | 83.7  | R.LASYLEKVR.Q                     |                                 |
|                              |              |      |        | 206 - 214 | 545.83  | 69.9  | R.ILDDTLCK.A                      | Carbamidomethyl: 8              |
|                              |              |      |        | 48 - 58   | 556.79  | 60.5  | R.SFSACSVGLGK.S                   | Carbamidomethyl: 5              |
|                              |              |      |        | 445 - 454 | 566.79  | 38.7  | R.PICVSCPGSR.F                    | Carbamidomethyl:<br>3, 6        |
|                              |              |      |        | 99 - 107  | 577.31  | 60.5  | K.ETMQFLNDR.L                     |                                 |
|                              |              |      |        | 167 - 176 | 578.36  | 40.6  | A.RLVVQIDNAK.L                    |                                 |
|                              |              |      |        | 99 - 107  | 585.27  | 31.9  | K.ETMQFLNDR.L                     | Oxidation: 3                    |
|                              |              |      |        | 28 - 38   | 601.78  | 63.8  | R.VSTIFSSSSCK.L                   | Carbamidomethyl:<br>10          |
|                              |              |      |        | 234 - 243 | 613.82  | 30    | K.NHEEEVNSLR.C                    |                                 |
|                              |              |      |        | 223 - 232 | 616.86  | 49.7  | E.SLKEELLCLK.K                    | Carbamidomethyl: 8              |
|                              |              |      |        | 205 - 214 | 623.84  | 56.6  | R.RILDDTLCK.A                     | Carbamidomethyl: 9              |
|                              |              |      |        | 184 - 193 | 629.31  | 48.2  | R.TKYETEVTMR.Q                    |                                 |
|                              |              |      |        | 184 - 193 | 637.26  | 38.6  | R.TKYETEVTMR.Q                    | Oxidation: 9                    |
|                              |              |      |        | 388 - 398 | 699.3   | 46    | R.ARLECEISTYR.G                   | Carbamidomethyl: 5              |
|                              |              |      |        | 335 - 347 | 703.31  | 99.3  | R.DALESTLAETEAR.Y                 |                                 |
|                              |              |      |        | 221 - 232 | 730.92  | 73.7  | Q.VESLKEELLCLK.K                  | Carbamidomethyl:<br>10          |
|                              |              |      |        | 376 - 387 | 752.91  | 100.2 | R.QNQEYQVLLDVR.A                  |                                 |
|                              |              |      |        | 376 - 387 | 753.37  | 41    | R.QNQEYQVLLDVR.A                  | Deamidated: 3                   |
|                              |              |      |        | 250 - 264 | 811.4   | 58.2  | R.LNVEVDAAPPVDLN<br>R.V           |                                 |
|                              |              |      |        | 298 - 318 | 821.76  | 62.8  | Q.QVVSSEQLQSYQ<br>AEIIELR.T       |                                 |
|                              |              |      |        | 298 - 318 | 822.08  | 26.9  | Q.QVVSSEQLQSYQ<br>AEIIELR.T       | Deamidated: 1                   |
|                              |              |      |        | 346 - 370 | 927.1   | 38.8  | E.ARYSSQLAQMQGLI<br>GNVESQLAEIR.C | Oxidation: 10;<br>Deamidated: 6 |
|                              |              |      |        | 319 - 334 | 928.44  | 75.5  | R.TVNALEIELQAQHS<br>MR.D          | Oxidation: 15                   |
|                              |              |      |        | 215 - 232 | 1044.51 | 88.8  | K.ADLEAQVESLKEEL<br>LCLK.K        | Carbamidomethyl:<br>16          |
|                              |              |      |        | 298 - 317 | 1154.08 | 111   | Q.QVVSSEQLQSYQ<br>AEIIELR.R       |                                 |
| Plakop<br>hilin 3<br>Partial | gij999000068 | 25.2 | 203.9  | 82 - 89   | 477.31  | 55.1  | R.ILNPLDR.V                       |                                 |
|                              |              |      |        | 192 - 205 | 789.88  | 58.2  | R.AASSLLANLWQYNK<br>.L            |                                 |

|                                               |              |       |        |                  |         |      |                                            |                        |
|-----------------------------------------------|--------------|-------|--------|------------------|---------|------|--------------------------------------------|------------------------|
|                                               |              |       |        | 138 - 163        | 876.53  | 40.8 | K.SPPADVLINIIAVLNN<br>LVVASPVAAR.D         | Deamidated: 15         |
|                                               |              |       |        | 24 - 39          | 965.96  | 49.8 | K.GLEWLWSPQIVGLY<br>NR.L                   |                        |
| PREDI<br>CTED:<br>desmo<br>glein-4            | gij426253981 | 113.8 | 269.1  | 379 - 385        | 414.29  | 41.2 | R.IQVVNVR.E                                |                        |
|                                               |              |       |        | 583 - 593        | 671.38  | 39.2 | R.ACELPQIIELR.A                            | Carbamidomethyl: 2     |
|                                               |              |       |        | 92 - 110         | 677.35  | 71.4 | R.ISGAGIDRPPYGVFT<br>INPR.T                |                        |
|                                               |              |       |        | 123 - 133        | 712.87  | 61.2 | R.EITPLFLIYCR.A                            | Carbamidomethyl:<br>10 |
| PREDI<br>CTED:<br>desmo<br>plakin             | gij426251400 | 331   | 1418.6 | 362 - 368        | 425.72  | 40.5 | K.QEAFSIR.M                                |                        |
|                                               |              |       |        | 2,372 -<br>2,379 | 431.76  | 33.6 | R.GLVGIEFK.E                               |                        |
|                                               |              |       |        | 1,056 -<br>1,062 | 454.27  | 33.3 | R.YIELLTR.S                                |                        |
|                                               |              |       |        | 2,224 -<br>2,231 | 460.27  | 27.6 | K.NFVDPVTK.K                               |                        |
|                                               |              |       |        | 2,759 -<br>2,767 | 484.29  | 39.9 | K.AFIGFEGVK.G                              |                        |
|                                               |              |       |        | 148 - 156        | 496.74  | 59.2 | K.YGDGIQLAR.S                              |                        |
|                                               |              |       |        | 1,110 -<br>1,117 | 503.28  | 40.8 | K.FLDQNLQK.Y                               |                        |
|                                               |              |       |        | 1,759 -<br>1,768 | 560.31  | 60   | R.LQSLTESLTK.E                             |                        |
|                                               |              |       |        | 1,087 -<br>1,095 | 565.35  | 26.7 | K.IEVLEELR.L                               |                        |
|                                               |              |       |        | 1,467 -<br>1,477 | 624.31  | 75.2 | K.NTLAQTETLR.R                             |                        |
|                                               |              |       |        | 467 - 476        | 635.84  | 46.9 | R.LLEQIKELER.E                             |                        |
|                                               |              |       |        | 324 - 334        | 636.36  | 37.4 | R.QLQNIQATSR.E                             |                        |
|                                               |              |       |        | 1,427 -<br>1,437 | 656.41  | 37.6 | T.KTTIHQLTLQK.E                            | Deamidated: 10         |
|                                               |              |       |        | 2,715 -<br>2,733 | 665.67  | 61.7 | R.LLEAQACTGGIIHPT<br>TGQK.L                | Carbamidomethyl: 7     |
|                                               |              |       |        | 1,261 -<br>1,271 | 676.83  | 38.3 | R.NKYETEINITK.T                            |                        |
|                                               |              |       |        | 2,420 -<br>2,434 | 769.93  | 72.4 | R.LLEAQIATGGIIDPK.<br>E                    |                        |
|                                               |              |       |        | 2,245 -<br>2,258 | 774.44  | 27.5 | R.IEPHTGLLLLSVQK.<br>R                     |                        |
|                                               |              |       |        | 1,665 -<br>1,679 | 822.92  | 92.9 | K.VTSLTQQLEQASIVK<br>.K                    |                        |
|                                               |              |       |        | 764 - 780        | 928.45  | 97.2 | K.SVQNDSQAIQVLN<br>QLK.D                   |                        |
|                                               |              |       |        | 2,467 -<br>2,483 | 1015.45 | 75.3 | K.GFFDPNTEENLTYL<br>QLK.E                  | Deamidated: 6          |
|                                               |              |       |        | 2,333 -<br>2,362 | 1041.21 | 74.3 | K.IGLVRPGTALELLEA<br>QAATGFIVDPVSNLR.<br>L | Deamidated: 16         |
| PREDI<br>CTED:<br>filaggrin<br>-2             | gij426218939 | 209   | 138    | 7 - 17           | 636.36  | 54.8 | R.SVVTVIDTFYK.Y                            |                        |
| PREDI<br>CTED:<br>junction<br>plakogl<br>obin | gij426238025 | 81.7  | 999.4  | 500 - 506        | 372.25  | 61.2 | T.ATIGLIR.N                                |                        |

|                       |              |      |        |           |        |       |                              |                                      |
|-----------------------|--------------|------|--------|-----------|--------|-------|------------------------------|--------------------------------------|
|                       |              |      |        | 527 - 533 | 406.81 | 55.5  | R.LVQLLVK.A                  |                                      |
|                       |              |      |        | 217 - 224 | 445.79 | 43.4  | R.EGLLAIFK.S                 |                                      |
|                       |              |      |        | 116 - 124 | 499.81 | 53.1  | R.LAEPSSLK.S                 |                                      |
|                       |              |      |        | 541 - 555 | 533.89 | 31.1  | R.HVAAGTQQPYTDG<br>VR.M      |                                      |
|                       |              |      |        | 478 - 487 | 544.35 | 48.5  | R.LNYGIPAIVK.L               |                                      |
|                       |              |      |        | 664 - 674 | 618.88 | 77    | R.VSVELTNSLHK.H              |                                      |
|                       |              |      |        | 368 - 377 | 651.86 | 62.6  | R.LVQNCLWTLR.N               | Carbamidomethyl: 5                   |
|                       |              |      |        | 178 - 191 | 706.43 | 91.4  | R.ALMGSPQLVAAVVR<br>.T       |                                      |
|                       |              |      |        | 178 - 191 | 714.37 | 59.6  | R.ALMGSPQLVAAVVR<br>.T       | Oxidation: 3                         |
|                       |              |      |        | 507 - 526 | 719.35 | 38.3  | R.NLALCPANHAPLQE<br>AAVIPR.L | Carbamidomethyl:<br>5; Deamidated: 1 |
|                       |              |      |        | 638 - 651 | 742.37 | 93.6  | R.NEGTATYAAAVLFR.<br>I       |                                      |
|                       |              |      |        | 304 - 320 | 904.5  | 62    | K.LIILANGGPQALVQI<br>MR.N    | Deamidated: 6                        |
|                       |              |      |        | 427 - 444 | 968.01 | 141.5 | K.TLVTQNSGVEALIHA<br>ILR.A   |                                      |
| PREDI<br>CTED:<br>K34 | gij426238003 | 64.1 | 3921.2 | 224 - 229 | 366.18 | 47.4  | R.VLNETR.A                   |                                      |
|                       |              |      |        | 323 - 329 | 408.74 | 50.9  | E.SQLAEIR.S                  |                                      |
|                       |              |      |        | 136 - 142 | 412.22 | 50.5  | K.LASDDFR.T                  |                                      |
|                       |              |      |        | 67 - 73   | 412.23 | 53.8  | R.LASYLEK.V                  |                                      |
|                       |              |      |        | 103 - 108 | 432.19 | 37.3  | N.YQSYFR.T                   |                                      |
|                       |              |      |        | 192 - 202 | 442.9  | 34.8  | K.KNHEEEANSLR.S              |                                      |
|                       |              |      |        | 185 - 191 | 452.75 | 29.4  | K.EELLCLK.K                  | Carbamidomethyl: 5                   |
|                       |              |      |        | 182 - 192 | 454.29 | 27.6  | E.SLKEELLCLK.N               | Carbamidomethyl: 8                   |
|                       |              |      |        | 80 - 87   | 474.23 | 43.4  | R.ENAELESR.I                 |                                      |
|                       |              |      |        | 230 - 241 | 483.91 | 53.7  | R.AQYEALVETNRR.D             |                                      |
|                       |              |      |        | 109 - 116 | 494.79 | 59.1  | R.TIEELQK.I                  |                                      |
|                       |              |      |        | 127 - 135 | 507.32 | 67.1  | R.LVIQIDNAK.L                |                                      |
|                       |              |      |        | 229 - 241 | 535.98 | 28.9  | T.RAQYEALVETNRR.<br>D        |                                      |
|                       |              |      |        | 67 - 75   | 539.83 | 83.7  | R.LASYLEKVR.Q                |                                      |
|                       |              |      |        | 165 - 173 | 552.84 | 77.8  | R.ILDELTLCK.S                | Carbamidomethyl: 8                   |
|                       |              |      |        | 242 - 249 | 555.25 | 52.5  | R.DVEEWYIR.Q                 |                                      |
|                       |              |      |        | 349 - 357 | 562.78 | 62    | R.LESEINTYR.G                |                                      |
|                       |              |      |        | 58 - 66   | 577.31 | 60.5  | K.ETMQFLNDR.L                |                                      |
|                       |              |      |        | 58 - 66   | 585.27 | 31.9  | K.ETMQFLNDR.L                | Oxidation: 3                         |
|                       |              |      |        | 349 - 358 | 591.26 | 61.1  | R.LESEINTYR.G.L              |                                      |
|                       |              |      |        | 193 - 202 | 599.76 | 39.1  | K.NHEEEANSLR.S               |                                      |
|                       |              |      |        | 284 - 293 | 604.27 | 37.2  | E.VELQAQHNL.R.D              |                                      |
|                       |              |      |        | 174 - 184 | 609.82 | 81    | K.SDLEAQVESLK.E              |                                      |
|                       |              |      |        | 182 - 191 | 616.86 | 49.7  | E.SLKEELLCLK.K               | Carbamidomethyl: 8                   |
|                       |              |      |        | 164 - 173 | 630.85 | 45.6  | R.RILDELTLCK.S               | Carbamidomethyl: 9                   |
|                       |              |      |        | 241 - 249 | 633.32 | 48.4  | R.RDVEEWYIR.Q                |                                      |
|                       |              |      |        | 47 - 57   | 644.76 | 47.6  | W.FCEGSFNGNEK.E              | Carbamidomethyl: 2                   |
|                       |              |      |        | 47 - 57   | 645.28 | 27    | W.FCEGSFNGNEK.E              | Carbamidomethyl:<br>2; Deamidated: 7 |
|                       |              |      |        | 230 - 240 | 647.31 | 94.8  | R.AQYEALVETNR.R              |                                      |
|                       |              |      |        | 230 - 240 | 647.8  | 70.7  | R.AQYEALVETNR.R              | Deamidated: 2                        |
|                       |              |      |        | 92 - 102  | 650.26 | 46.3  | R.SQQQEPLVCPN.Y              | Carbamidomethyl: 9                   |
|                       |              |      |        | 277 - 293 | 664.35 | 44    | R.RTVNALEVELQAQH<br>NLR.D    |                                      |

|                       |              |    |     |           |         |       |                                    |                                             |
|-----------------------|--------------|----|-----|-----------|---------|-------|------------------------------------|---------------------------------------------|
|                       |              |    |     | 283 - 293 | 668.82  | 49.1  | L.EVELQAQHNLR.D                    |                                             |
|                       |              |    |     | 347 - 357 | 676.31  | 65.3  | K.ARLESEINTYR.G                    |                                             |
|                       |              |    |     | 295 - 306 | 682.32  | 79.3  | D.SLENTLTETEAR.Y                   |                                             |
|                       |              |    |     | 229 - 240 | 725.35  | 39.9  | T.RAQYEALVETNR.R                   |                                             |
|                       |              |    |     | 230 - 241 | 725.86  | 39    | R.AQYEALVETNRR.D                   | Deamidated: 10                              |
|                       |              |    |     | 230 - 241 | 725.88  | 26.3  | R.AQYEALVETNRR.D                   | Deamidated: 2                               |
|                       |              |    |     | 180 - 191 | 730.92  | 73.7  | Q.VESLKEELLCLK.K                   | Carbamidomethyl: 10                         |
|                       |              |    |     | 335 - 346 | 738.93  | 31.1  | R.QNQEYQVLLDVK.A                   |                                             |
|                       |              |    |     | 294 - 306 | 739.84  | 98.7  | R.DSLENTLTETEAR.Y                  |                                             |
|                       |              |    |     | 294 - 306 | 740.3   | 93.1  | R.DSLENTLTETEAR.Y                  | Deamidated: 5                               |
|                       |              |    |     | 174 - 192 | 744.77  | 40.3  | K.SDLEAQVESLKEEL<br>LCLK.N         | Carbamidomethyl: 16                         |
|                       |              |    |     | 281 - 293 | 760.92  | 94.7  | N.ALEVELQAQHNLR.<br>D              |                                             |
|                       |              |    |     | 109 - 121 | 787.41  | 71    | R.TIEELQQKILCAK.S                  | Carbamidomethyl: 11                         |
|                       |              |    |     | 209 - 223 | 813.4   | 97.7  | R.LNVEVDAAPTVDLN<br>R.V            |                                             |
|                       |              |    |     | 202 - 223 | 813.41  | 42.6  | L.RSQLGDRLNVEVDA<br>APTVDLNR.V     |                                             |
|                       |              |    |     | 209 - 223 | 813.89  | 45.9  | R.LNVEVDAAPTVDLN<br>R.V            | Deamidated: 2                               |
|                       |              |    |     | 257 - 277 | 821.76  | 62.8  | K.QVVSSEQLQSYQ<br>AEIIELR.T        |                                             |
|                       |              |    |     | 257 - 277 | 822.08  | 26.9  | K.QVVSSEQLQSYQ<br>AEIIELR.T        | Deamidated: 1                               |
|                       |              |    |     | 278 - 293 | 917.98  | 138.5 | R.TVNALEVELQAQHN<br>LR.D           |                                             |
|                       |              |    |     | 278 - 293 | 918.46  | 122.2 | R.TVNALEVELQAQHN<br>LR.D           | Deamidated: 10                              |
|                       |              |    |     | 278 - 293 | 918.48  | 99.6  | R.TVNALEVELQAQHN<br>LR.D           | Deamidated: 3                               |
|                       |              |    |     | 358 - 383 | 947.72  | 70.6  | R.GLLDSEDSKLPSNP<br>CATTNASSNFCR.S | Carbamidomethyl: 15, 25                     |
|                       |              |    |     | 358 - 383 | 948.42  | 38    | R.GLLDSEDSKLPSNP<br>CATTNASSNFCR.S | Carbamidomethyl: 15, 25; Deamidated: 13, 19 |
|                       |              |    |     | 367 - 383 | 948.88  | 127.4 | K.LPSNPCATTNASSN<br>FCR.S          | Carbamidomethyl: 6, 16                      |
|                       |              |    |     | 174 - 191 | 1052.55 | 102.5 | K.SDLEAQVESLKEEL<br>LCLK.K         | Carbamidomethyl: 16                         |
|                       |              |    |     | 174 - 191 | 1053.03 | 63.9  | K.SDLEAQVESLKEEL<br>LCLK.K         | Carbamidomethyl: 16; Deamidated: 6          |
|                       |              |    |     | 92 - 108  | 1072.43 | 77.8  | R.SQQQEPLVCPNYQ<br>SYFR.T          | Carbamidomethyl: 9                          |
|                       |              |    |     | 92 - 108  | 1073    | 45.1  | R.SQQQEPLVCPNYQ<br>SYFR.T          | Carbamidomethyl: 9; Deamidated: 2           |
|                       |              |    |     | 257 - 276 | 1154.08 | 111   | K.QVVSSEQLQSYQ<br>AEIIELR.R        |                                             |
| PREDI<br>CTED:<br>K32 | gij426238005 | 46 | 990 | 133 - 139 | 404.23  | 49.7  | K.LAADDFR.S                        |                                             |
|                       |              |    |     | 320 - 326 | 408.74  | 50.9  | E.SQLAEIR.C                        |                                             |
|                       |              |    |     | 106 - 113 | 494.79  | 59.1  | K.TIEELQQK.I                       |                                             |
|                       |              |    |     | 124 - 132 | 515.33  | 61.5  | R.IVVQIDNTK.L                      |                                             |
|                       |              |    |     | 355 - 363 | 518.77  | 32.2  | R.GLLDSEDCK.L                      | Carbamidomethyl: 8                          |
|                       |              |    |     | 162 - 170 | 552.84  | 77.8  | R.ILDELTCLK.A                      | Carbamidomethyl: 8                          |
|                       |              |    |     | 55 - 63   | 554.28  | 47.8  | K.ETLQFLNSR.L                      |                                             |
|                       |              |    |     | 140 - 149 | 598.31  | 51.5  | R.SKYETELGLR.Q                     |                                             |
|                       |              |    |     | 161 - 170 | 630.85  | 45.6  | R.RILDELTCLK.A                     | Carbamidomethyl: 9                          |

|                       |              |      |        |           |         |       |                                   |                                         |
|-----------------------|--------------|------|--------|-----------|---------|-------|-----------------------------------|-----------------------------------------|
|                       |              |      |        | 344 - 354 | 668.31  | 44.8  | R.ARLEAEINTYR.G                   |                                         |
|                       |              |      |        | 292 - 303 | 682.32  | 79.3  | D.SLENTLTETEAR.Y                  |                                         |
|                       |              |      |        | 291 - 303 | 739.84  | 98.7  | R.DSLENTLTETEAR.Y                 |                                         |
|                       |              |      |        | 291 - 303 | 740.3   | 93.1  | R.DSLENTLTETEAR.Y                 | Deamidated: 5                           |
|                       |              |      |        | 303 - 326 | 908.11  | 29.6  | A.RYASQLAQMQLV<br>TNVESQLAEIR.C   | Oxidation: 9;<br>Deamidated: 15         |
|                       |              |      |        | 302 - 326 | 926.76  | 31.7  | E.ARYASQLAQMQLV<br>VTNVESQLAEIR.C | Deamidated: 6, 9                        |
| PREDI<br>CTED:<br>K20 | gij426237957 | 48.3 | 175    | 96 - 103  | 484.77  | 25.3  | N.SHLELQIK.H                      | Deamidated: 6                           |
|                       |              |      |        | 81 - 89   | 553.82  | 50.7  | R.LASYLERVR.S                     |                                         |
| PREDI<br>CTED:<br>K39 | gij426239024 | 56.9 | 713.4  | 239 - 245 | 452.75  | 29.4  | K.EELLCLK.N                       | Carbamidomethyl: 5                      |
|                       |              |      |        | 163 - 170 | 494.79  | 59.1  | A.TIEELQKQK.I                     |                                         |
|                       |              |      |        | 488 - 502 | 612.63  | 51.9  | K.VISSYEHVQPCFITR<br>.A           | Carbamidomethyl:<br>11                  |
|                       |              |      |        | 236 - 245 | 616.86  | 49.7  | Q.SLKEELLCLK.N                    | Carbamidomethyl: 8                      |
|                       |              |      |        | 228 - 245 | 696.72  | 81.6  | K.ADLEAQVQSLKEEL<br>LCLK.N        | Carbamidomethyl:<br>16; Deamidated: 6   |
|                       |              |      |        | 234 - 245 | 730.92  | 73.7  | Q.VQSLKEELLCLK.N                  | Carbamidomethyl:<br>10; Deamidated: 2   |
|                       |              |      |        | 263 - 277 | 825.91  | 100.9 | R.LHIEVTSAPSVDLNR<br>.V           |                                         |
|                       |              |      |        | 228 - 245 | 1044.51 | 88.8  | K.ADLEAQVQSLKEEL<br>LCLK.N        | Carbamidomethyl:<br>16; Deamidated: 8   |
| PREDI<br>CTED:<br>K40 | gij426237961 | 47.4 | 587.7  | 169 - 175 | 404.23  | 49.7  | K.LAADDFR.S                       |                                         |
|                       |              |      |        | 100 - 106 | 412.23  | 53.8  | R.LASYLEK.V                       |                                         |
|                       |              |      |        | 160 - 168 | 530.78  | 50.2  | R.LAVQLDNCK.L                     | Carbamidomethyl: 8                      |
|                       |              |      |        | 100 - 108 | 539.83  | 83.7  | R.LASYLEKVR.G                     |                                         |
|                       |              |      |        | 100 - 109 | 568.28  | 38.8  | R.LASYLEKVRG.L                    |                                         |
|                       |              |      |        | 91 - 99   | 577.31  | 60.5  | K.ETMQFLNDR.L                     |                                         |
|                       |              |      |        | 91 - 99   | 585.27  | 31.9  | K.ETMQFLNDR.L                     | Oxidation: 3                            |
|                       |              |      |        | 382 - 390 | 599.27  | 61.8  | R.LECEINTYR.G                     | Carbamidomethyl: 3                      |
|                       |              |      |        | 380 - 390 | 712.8   | 76.9  | K.ARLECEINTYR.G                   | Carbamidomethyl: 5                      |
|                       |              |      |        | 297 - 309 | 781.37  | 34    | E.QLQGCQTEILELK.R                 | Carbamidomethyl:<br>5; Deamidated: 1, 6 |
| PREDI<br>CTED:<br>K82 | gij426224444 | 56.7 | 1552.9 | 129 - 135 | 413.72  | 48.1  | R.FASFINK.V                       |                                         |
|                       |              |      |        | 129 - 135 | 414.23  | 46.7  | R.FASFINK.V                       | Deamidated: 6                           |
|                       |              |      |        | 138 - 144 | 453.78  | 42.3  | R.FLEQKNK.L                       |                                         |
|                       |              |      |        | 409 - 420 | 473.95  | 58.5  | K.LGLDIEIATYRR.L                  |                                         |
|                       |              |      |        | 421 - 428 | 487.25  | 73.4  | R.LLEGEEQR.L                      |                                         |
|                       |              |      |        | 392 - 399 | 497.75  | 62.4  | K.QDMACLLK.E                      | Carbamidomethyl:<br>5; Oxidation: 3     |
|                       |              |      |        | 380 - 389 | 536.33  | 87.2  | K.LAGLEEALQK.A                    |                                         |
|                       |              |      |        | 421 - 429 | 543.82  | 35.2  | R.LLEGEEQRL.C                     |                                         |
|                       |              |      |        | 400 - 408 | 564.27  | 39.2  | K.EYQEVMSK.L                      |                                         |
|                       |              |      |        | 420 - 428 | 565.29  | 43    | R.RLEGEEQR.L                      |                                         |
|                       |              |      |        | 390 - 399 | 589.3   | 63.3  | K.AKQDMACLLK.E                    | Carbamidomethyl: 7                      |
|                       |              |      |        | 390 - 399 | 597.3   | 64.2  | K.AKQDMACLLK.E                    | Carbamidomethyl:<br>7; Oxidation: 5     |
|                       |              |      |        | 379 - 389 | 600.37  | 90.3  | C.KLAGLEEALQK.A                   |                                         |
|                       |              |      |        | 16 - 26   | 605.79  | 41.4  | R.SFSSCSAVLPR.V                   | Carbamidomethyl: 5                      |
|                       |              |      |        | 409 - 419 | 632.39  | 93.5  | K.LGLDIEIATYR.R                   |                                         |

|                                |              |      |        |           |        |       |                             |                                             |
|--------------------------------|--------------|------|--------|-----------|--------|-------|-----------------------------|---------------------------------------------|
|                                |              |      |        | 380 - 391 | 635.82 | 79.5  | K.LAGLEEEALQKAK.Q           |                                             |
|                                |              |      |        | 280 - 291 | 658.38 | 75.2  | R.ELDTDGIIAQIK.A            |                                             |
|                                |              |      |        | 194 - 204 | 677.81 | 43.9  | R.CLQDTLEGYKK.K             | Carbamidomethyl: 1                          |
|                                |              |      |        | 378 - 389 | 680.36 | 75    | K.CKLAGLEEEALQK.A           | Carbamidomethyl: 1                          |
|                                |              |      |        | 429 - 444 | 816.85 | 78.2  | R.LCEGVGPVNISVSS<br>SK.G    | Carbamidomethyl: 2                          |
|                                |              |      |        | 48 - 64   | 910.4  | 97.5  | R.ALGCLGSWSLCNV<br>GLGR.P   | Carbamidomethyl:<br>4, 11                   |
| PREDI<br>CTED:<br>K84          | gij426224440 | 64.1 | 830.6  | 168 - 174 | 414.23 | 46.7  | K.FASFIDK.V                 |                                             |
|                                |              |      |        | 177 - 183 | 453.78 | 42.3  | R.FLEQQNK.L                 |                                             |
|                                |              |      |        | 177 - 188 | 497.6  | 34.2  | R.FLEQQNKLLETK.W            |                                             |
|                                |              |      |        | 245 - 253 | 533.27 | 36.2  | K.YEEEVGLRA.S               |                                             |
|                                |              |      |        | 244 - 253 | 597.26 | 45.6  | K.KYEEEVGLRA.S              |                                             |
|                                |              |      |        | 54 - 64   | 598.77 | 56    | R.SVISFGSCSPR.I             | Carbamidomethyl: 8                          |
|                                |              |      |        | 530 - 542 | 629.81 | 74.8  | R.VGGGDLLGVGCR.<br>G        | Carbamidomethyl:<br>12                      |
|                                |              |      |        | 448 - 458 | 639.42 | 41.3  | K.LALDIEIATYR.R             |                                             |
|                                |              |      |        | 319 - 330 | 643.36 | 79.3  | R.DLNVDGIIADIK.A            |                                             |
|                                |              |      |        | 177 - 188 | 746.4  | 39.2  | R.FLEQQNKLLETK.W            | Deamidated: 6                               |
|                                |              |      |        | 103 - 117 | 827.82 | 72.2  | R.SGLSYGFCSPGFG<br>YR.V     | Carbamidomethyl: 8                          |
| PREDI<br>CTED:<br>K85-<br>like | gij426226634 | 56.3 | 1731.1 | 149 - 155 | 406.27 | 47.9  | R.FAAFIDK.V                 |                                             |
|                                |              |      |        | 158 - 164 | 453.78 | 42.3  | R.FLEQQNK.L                 |                                             |
|                                |              |      |        | 72 - 80   | 473.74 | 66.9  | R.SLCAVGSPR.I               | Carbamidomethyl: 3                          |
|                                |              |      |        | 170 - 176 | 484.74 | 43.3  | K.LQFYQNR.Q                 |                                             |
|                                |              |      |        | 170 - 176 | 485.24 | 26.5  | K.LQFYQNR.Q                 | Deamidated: 6                               |
|                                |              |      |        | 364 - 372 | 487.76 | 52.8  | R.LTAEVENAK.Q               |                                             |
|                                |              |      |        | 312 - 320 | 490.77 | 43    | K.AQYDGIASR.S               |                                             |
|                                |              |      |        | 158 - 169 | 497.6  | 34.2  | R.FLEQQNKLLETK.L            |                                             |
|                                |              |      |        | 406 - 413 | 497.75 | 62.4  | K.QDMACLLK.E                | Carbamidomethyl:<br>5; Oxidation: 3         |
|                                |              |      |        | 352 - 359 | 508.76 | 36    | K.EEINELNR.V                |                                             |
|                                |              |      |        | 149 - 157 | 533.82 | 69.7  | R.FAAFIDKVR.F               |                                             |
|                                |              |      |        | 394 - 403 | 550.33 | 66.8  | K.LVGLEEEALQK.A             |                                             |
|                                |              |      |        | 414 - 422 | 564.27 | 39.2  | K.EYQEVMSK.L                |                                             |
|                                |              |      |        | 363 - 372 | 565.76 | 38.9  | Q.RLTAEVENAK.Q              |                                             |
|                                |              |      |        | 404 - 413 | 589.3  | 63.3  | K.AKQDMACLLK.E              | Carbamidomethyl: 7                          |
|                                |              |      |        | 81 - 90   | 596.35 | 53    | R.ISVSYAWPLR.G              |                                             |
|                                |              |      |        | 404 - 413 | 597.3  | 64.2  | K.AKQDMACLLK.E              | Carbamidomethyl:<br>7; Oxidation: 5         |
|                                |              |      |        | 350 - 359 | 623.32 | 74    | R.TKEEINELNR.V              |                                             |
|                                |              |      |        | 350 - 359 | 623.8  | 59.4  | R.TKEEINELNR.V              | Deamidated: 6                               |
|                                |              |      |        | 208 - 224 | 653.35 | 38.3  | R.LASELNHVEEVLEG<br>YKK.K   |                                             |
|                                |              |      |        | 349 - 359 | 701.33 | 61.2  | R.RTKEEINELNR.V             |                                             |
|                                |              |      |        | 158 - 169 | 746.4  | 39.2  | R.FLEQQNKLLETK.L            | Deamidated: 6                               |
|                                |              |      |        | 165 - 176 | 776.91 | 75.6  | K.LLETKLQFYQNR.Q            |                                             |
|                                |              |      |        | 443 - 456 | 782.34 | 103.4 | R.LCEGVGSINICVSR.<br>S      | Carbamidomethyl:<br>2, 11                   |
|                                |              |      |        | 178 - 196 | 791.36 | 39    | Q.CCESNLEPLFNGYI<br>ETLRR.E | Carbamidomethyl:<br>1, 2; Deamidated:<br>11 |

|                                    |              |      |       |           |         |      |                              |                                                |
|------------------------------------|--------------|------|-------|-----------|---------|------|------------------------------|------------------------------------------------|
|                                    |              |      |       | 457 - 472 | 801.85  | 94.2 | R.SQGGVICGDLGSTV<br>PR.G     | Carbamidomethyl: 7                             |
|                                    |              |      |       | 177 - 196 | 834.38  | 29.2 | R.QCCESNLEPLFNGY<br>IETLRR.E | Carbamidomethyl:<br>2, 3; Deamidated: 1,<br>12 |
| PREDI<br>CTED:<br>K1b              | gij426224420 | 60.9 | 420.7 | 183 - 189 | 414.23  | 46.7 | K.FASFIDK.V                  |                                                |
|                                    |              |      |       | 192 - 198 | 453.78  | 42.3 | R.FLEQQNQ.V                  |                                                |
|                                    |              |      |       | 436 - 445 | 564.78  | 35.8 | K.LQDLEAALQQ.S               |                                                |
|                                    |              |      |       | 369 - 378 | 590.31  | 65.8 | K.YQELQITAGR.H               | Deamidated: 2                                  |
|                                    |              |      |       | 325 - 335 | 647.87  | 31.4 | D.TNVILSMDNNR.S              | Oxidation: 7;<br>Deamidated: 9, 10             |
|                                    |              |      |       | 192 - 203 | 738.35  | 81   | R.FLEQQNQVLQTK.W             |                                                |
| PREDI<br>CTED:<br>K4               | gij426224418 | 57.6 | 356.4 | 152 - 158 | 414.23  | 46.7 | K.FASFIDK.V                  |                                                |
|                                    |              |      |       | 161 - 167 | 453.78  | 42.3 | R.FLEQQNK.V                  |                                                |
|                                    |              |      |       | 434 - 444 | 639.42  | 41.3 | K.LALDIEIATYR.K              |                                                |
|                                    |              |      |       | 428 - 444 | 660.98  | 57.8 | Q.ELMSVKLALDIEIAT<br>YR.K    | Oxidation: 3                                   |
|                                    |              |      |       | 305 - 316 | 679.89  | 28.2 | R.NLDLDSIAEVR.A              | Deamidated: 1                                  |
|                                    |              |      |       | 258 - 277 | 768.74  | 41.4 | M.SKVELEAKVDALND<br>EINFLR.I | Deamidated: 17                                 |
| PREDI<br>CTED:<br>K7               | gij426224448 | 50.3 | 524.1 | 90 - 96   | 414.23  | 46.7 | K.FASFIDK.V                  |                                                |
|                                    |              |      |       | 99 - 105  | 453.78  | 42.3 | R.FLEQQNK.L                  |                                                |
|                                    |              |      |       | 99 - 110  | 497.6   | 34.2 | R.FLEQQNKLLLETK.W            |                                                |
|                                    |              |      |       | 176 - 186 | 610.85  | 78.2 | R.TAAENEFVVLK.K              |                                                |
|                                    |              |      |       | 371 - 381 | 639.42  | 41.3 | K.LALDIEIATYR.K              |                                                |
|                                    |              |      |       | 176 - 187 | 674.86  | 81.2 | R.TAAENEFVVLKK.D             |                                                |
|                                    |              |      |       | 99 - 110  | 746.4   | 39.2 | R.FLEQQNKLLLETK.W            | Deamidated: 6                                  |
| PREDI<br>CTED:<br>K79              | gij426224416 | 56.5 | 564   | 137 - 143 | 414.23  | 46.7 | K.FASFIDK.V                  |                                                |
|                                    |              |      |       | 146 - 152 | 453.78  | 42.3 | R.FLEQQNK.V                  |                                                |
|                                    |              |      |       | 226 - 236 | 610.85  | 78.2 | R.TAAENEFVVLK.K              |                                                |
|                                    |              |      |       | 292 - 303 | 665.4   | 90.4 | R.NLDLDSIAEVK.A              |                                                |
|                                    |              |      |       | 226 - 237 | 674.86  | 81.2 | R.TAAENEFVVLKK.D             |                                                |
| PREDI<br>CTED:<br>K80              | gij426226638 | 58.9 | 229.6 | 420 - 429 | 564.83  | 34.8 | K.LAQLEDALQQ.A               |                                                |
|                                    |              |      |       | 449 - 459 | 639.42  | 41.3 | K.LALDIEIATYR.K              |                                                |
|                                    |              |      |       | 131 - 144 | 754.46  | 55.1 | K.VTVNPSLLVPLDLK.<br>V       |                                                |
| PREDI<br>CTED:<br>KAP10-<br>8-like | gij426218385 | 29.5 | 103.8 | 175 - 186 | 687.33  | 96   | R.PASCLSLLCQPK.C             | Carbamidomethyl:<br>4, 9                       |
|                                    |              |      |       | 43 - 58   | 955.3   | 86.7 | C.CEPPCCAPSCCTSA<br>PR.L     | Carbamidomethyl:<br>1, 5, 6, 10, 11            |
| PREDI<br>CTED:<br>KAP12-<br>2-like | gij426218339 | 10.1 | 88.9  | 102 - 117 | 912.91  | 88.9 | R.PTLVYRPISCSTASC<br>L.-     | Carbamidomethyl:<br>10, 15                     |
| PREDI<br>CTED:<br>KAP13-<br>1-like | gij426219157 | 17.5 | 245.6 | 168 - 183 | 964.34  | 38   | R.SCPSSCYRPTCGS<br>VFY.-     | Carbamidomethyl:<br>2, 6, 11                   |
|                                    |              |      |       | 142 - 160 | 1017.43 | 91.2 | R.LGYGICGFPVLSSG             | Carbamidomethyl:                               |

|                                 |              |      |        |           |         |       |                             |                                    |
|---------------------------------|--------------|------|--------|-----------|---------|-------|-----------------------------|------------------------------------|
|                                 |              |      |        |           |         |       | SGFCR.P                     | 6, 18                              |
|                                 |              |      |        | 97 - 115  | 1054.45 | 96.5  | R.TSTFSSPCQTTFFG<br>SLAYR.S | Carbamidomethyl: 8                 |
| PREDICTED:<br>KAP16-<br>1-like  | gij426239028 | 82.3 | 465    | 656 - 664 | 551.77  | 44.1  | R.TFYIPSSCK.Q               | Carbamidomethyl: 8                 |
|                                 |              |      |        | 27 - 36   | 566.77  | 42.5  | R.GPVCLPSSCR.S              | Carbamidomethyl:<br>4, 9           |
|                                 |              |      |        | 679 - 688 | 582.3   | 57.6  | R.PICSGPITYR.Q              | Carbamidomethyl: 3                 |
|                                 |              |      |        | 626 - 635 | 604.79  | 50.1  | R.SISCEPLSCR.P              | Carbamidomethyl:<br>4, 9           |
|                                 |              |      |        | 689 - 698 | 614.31  | 34.2  | R.QPYLTSISYR.P              |                                    |
|                                 |              |      |        | 613 - 622 | 626.29  | 41.4  | R.PCQPTCYVVK.R              | Carbamidomethyl:<br>2, 6           |
|                                 |              |      |        | 555 - 565 | 666.33  | 56    | R.VSLVCEPICVR.P             | Carbamidomethyl:<br>5, 9           |
|                                 |              |      |        | 699 - 710 | 771.86  | 32.3  | R.PACYRPFYSILR.R            | Carbamidomethyl: 3                 |
|                                 |              |      |        | 10 - 26   | 961.9   | 106.7 | K.CPSVPAISLCSTEVS<br>CR.G   | Carbamidomethyl:<br>1, 10, 16      |
| PREDICTED:<br>KAP24-<br>1-like  | gij426219161 | 27.9 | 214.1  | 17 - 32   | 619.98  | 57    | R.THYYFPVTGSVALC<br>SR.H    | Carbamidomethyl:<br>14             |
|                                 |              |      |        | 224 - 236 | 694.37  | 45.7  | R.SLSSIPSSFPLR.Y            |                                    |
|                                 |              |      |        | 171 - 186 | 866.39  | 90.6  | R.SYQDLGFIPSGFSA<br>SR.Y    |                                    |
| PREDICTED:<br>KAP4-<br>7-like   | gij426237983 | 19.6 | 235.6  | 37 - 49   | 767.76  | 52.9  | R.TTCYRPSCGVSSC.<br>C       | Carbamidomethyl:<br>3, 8, 13       |
|                                 |              |      |        | 117 - 129 | 849.76  | 75.6  | R.CCQSVCCQPSCPR.<br>I       | Carbamidomethyl:<br>1, 2, 6, 7, 11 |
|                                 |              |      |        | 2 - 17    | 903.28  | 83.3  | M.VSSCCGSVCSQDS<br>CGR.S    | Carbamidomethyl:<br>4, 5, 9, 14    |
| PREDICTED:<br>plakoph<br>ilin-1 | gij426240585 | 46.2 | 192.1  | 310 - 325 | 925.89  | 58.1  | R.EPVDPEVFFNATGC<br>LR.A    | Carbamidomethyl:<br>14             |
|                                 |              |      |        | 293 - 309 | 966.44  | 119.1 | R.VIIPFSGWCDGNSN<br>LPR.E   | Carbamidomethyl: 9                 |
|                                 |              |      |        | 573 - 580 | 477.31  | 55.1  | R.ILNPLLD.R.V               |                                    |
|                                 |              |      |        | 189 - 204 | 710.85  | 55    | R.GVAGGGPGGIPEP<br>VTR.A    |                                    |
|                                 |              |      |        | 347 - 362 | 892.44  | 91.1  | K.NVTGILWNLSSSDH<br>LK.D    |                                    |
|                                 |              |      |        | 515 - 530 | 965.96  | 49.8  | K.GLEWLWSPQIVGLY<br>NR.L    |                                    |
| K33a                            | gij125091    | 46   | 3871.6 | 224 - 229 | 366.18  | 47.4  | H.VLNETR.A                  |                                    |
|                                 |              |      |        | 323 - 329 | 408.74  | 50.9  | E.SQLAEIR.S                 |                                    |
|                                 |              |      |        | 136 - 142 | 412.22  | 50.5  | K.LASDDFR.T                 |                                    |
|                                 |              |      |        | 67 - 73   | 412.23  | 53.8  | R.LASYLEK.V                 |                                    |
|                                 |              |      |        | 103 - 108 | 432.19  | 37.3  | N.YQSYFR.T                  |                                    |
|                                 |              |      |        | 185 - 191 | 452.75  | 29.4  | K.EELICK.Q                  | Carbamidomethyl: 5                 |
|                                 |              |      |        | 230 - 241 | 483.91  | 53.7  | R.AQYEALVETNRR.D            |                                    |
|                                 |              |      |        | 109 - 116 | 494.79  | 59.1  | R.TIEELQK.I                 |                                    |
|                                 |              |      |        | 145 - 152 | 498.78  | 31.7  | K.YETEVSLR.Q                |                                    |
|                                 |              |      |        | 127 - 135 | 500.34  | 71.6  | R.LVVQIDNAK.L               |                                    |
|                                 |              |      |        | 127 - 135 | 500.82  | 62.3  | R.LVVQIDNAK.L               | Deamidated: 7                      |
|                                 |              |      |        | 339 - 346 | 503.31  | 42.2  | E.YQVLLDVR.A                |                                    |
|                                 |              |      |        | 358 - 366 | 518.77  | 32.2  | R.GLLDSEDCK.L               | Carbamidomethyl: 8                 |



|  |  |  |  |           |        |       |                           |                                   |
|--|--|--|--|-----------|--------|-------|---------------------------|-----------------------------------|
|  |  |  |  | 229 - 241 | 535.98 | 28.9  | T.RAQYEALVETNRR.D         |                                   |
|  |  |  |  | 67 - 75   | 539.83 | 83.7  | R.LASYLEKVR.Q             |                                   |
|  |  |  |  | 1 - 13    | 545.25 | 28.3  | -.MSFNFCLPNLSFR.S         | Carbamidomethyl: 6; Deamidated: 4 |
|  |  |  |  | 396 - 404 | 546.2  | 59.8  | R.CGPCNTFVH.-             | Carbamidomethyl: 1, 4             |
|  |  |  |  | 165 - 173 | 552.84 | 77.8  | R.ILDELTLCK.S             | Carbamidomethyl: 8                |
|  |  |  |  | 242 - 249 | 555.25 | 52.5  | R.DVEEWYIR.Q              |                                   |
|  |  |  |  | 5 - 13    | 577.3  | 48.9  | N.FCLPNLSFR.S             | Carbamidomethyl: 2                |
|  |  |  |  | 58 - 66   | 577.31 | 60.5  | K.ETMQFLNDR.L             |                                   |
|  |  |  |  | 126 - 135 | 578.36 | 40.6  | A.RLVVQIDNAK.L            |                                   |
|  |  |  |  | 58 - 66   | 585.27 | 31.9  | K.ETMQFLNDR.L             | Oxidation: 3                      |
|  |  |  |  | 349 - 357 | 599.27 | 61.8  | R.LECEINTYR.G             | Carbamidomethyl: 3                |
|  |  |  |  | 284 - 293 | 604.27 | 37.2  | E.VELQAQHNLR.D            |                                   |
|  |  |  |  | 143 - 152 | 613.3  | 63.2  | R.TKYETEVSRLR.Q           |                                   |
|  |  |  |  | 153 - 163 | 614.35 | 70.3  | R.QLVEADLNGLR.R           |                                   |
|  |  |  |  | 153 - 163 | 614.84 | 69.6  | R.QLVEADLNGLR.R           | Deamidated: 8                     |
|  |  |  |  | 182 - 191 | 616.86 | 49.7  | E.SLKEELICK.Q             | Carbamidomethyl: 8                |
|  |  |  |  | 164 - 173 | 630.85 | 45.6  | R.RILDELTLCK.S            | Carbamidomethyl: 9                |
|  |  |  |  | 241 - 249 | 633.32 | 48.4  | R.RDVEEWYIR.Q             |                                   |
|  |  |  |  | 4 - 13    | 634.35 | 39.8  | F.NFCLPNLSFR.S            | Carbamidomethyl: 3                |
|  |  |  |  | 47 - 57   | 644.76 | 47.6  | W.FCEGSFNGNEK.E           | Carbamidomethyl: 2                |
|  |  |  |  | 47 - 57   | 645.28 | 27    | W.FCEGSFNGNEK.E           | Carbamidomethyl: 2; Deamidated: 7 |
|  |  |  |  | 230 - 240 | 647.31 | 94.8  | R.AQYEALVETNR.R           |                                   |
|  |  |  |  | 230 - 240 | 647.8  | 70.7  | R.AQYEALVETNR.R           | Deamidated: 2                     |
|  |  |  |  | 92 - 102  | 650.26 | 46.3  | R.SQQQEPLVCPN.Y           | Carbamidomethyl: 9                |
|  |  |  |  | 277 - 293 | 664.35 | 44    | R.RTVNALEVELQAQHNLR.D     |                                   |
|  |  |  |  | 283 - 293 | 668.82 | 49.1  | L.EVELQAQHNLR.D           |                                   |
|  |  |  |  | 295 - 306 | 682.32 | 79.3  | D.SLENTLTETEAR.Y          |                                   |
|  |  |  |  | 192 - 202 | 684.27 | 65.7  | K.QNHEQEVNTRL.S           |                                   |
|  |  |  |  | 153 - 164 | 692.38 | 26.1  | R.QLVEADLNGLRR.I          |                                   |
|  |  |  |  | 347 - 357 | 712.8  | 76.9  | R.ARLECEINTYR.G           | Carbamidomethyl: 5                |
|  |  |  |  | 229 - 240 | 725.35 | 39.9  | T.RAQYEALVETNR.R          |                                   |
|  |  |  |  | 230 - 241 | 725.86 | 39    | R.AQYEALVETNRR.D          | Deamidated: 10                    |
|  |  |  |  | 230 - 241 | 725.88 | 26.3  | R.AQYEALVETNRR.D          | Deamidated: 2                     |
|  |  |  |  | 381 - 393 | 728.82 | 56.8  | K.PIGPCISNPCVSR.T         | Carbamidomethyl: 5, 10            |
|  |  |  |  | 180 - 191 | 730.92 | 73.7  | R.VESLKEELICK.Q           | Carbamidomethyl: 10               |
|  |  |  |  | 294 - 306 | 739.84 | 98.7  | R.DSLENTLTETEAR.Y         |                                   |
|  |  |  |  | 294 - 306 | 740.3  | 93.1  | R.DSLENTLTETEAR.Y         | Deamidated: 5                     |
|  |  |  |  | 2 - 13    | 751.36 | 66.1  | M.SFNFCLPNLSFR.S          | Carbamidomethyl: 5                |
|  |  |  |  | 2 - 13    | 751.85 | 36.7  | M.SFNFCLPNLSFR.S          | Carbamidomethyl: 5; Deamidated: 3 |
|  |  |  |  | 335 - 346 | 752.91 | 100.2 | R.QNQEYQVLLDVR.A          |                                   |
|  |  |  |  | 335 - 346 | 753.37 | 41    | R.QNQEYQVLLDVR.A          | Deamidated: 3                     |
|  |  |  |  | 281 - 293 | 760.92 | 94.7  | N.ALEVELQAQHNLR.D         |                                   |
|  |  |  |  | 209 - 229 | 773.73 | 51.3  | R.LNVEVDAAPTVDLNHVLNETR.A |                                   |
|  |  |  |  | 209 - 229 | 774.02 | 27.8  | R.LNVEVDAAPTVDLNHVLNETR.A | Deamidated: 2                     |
|  |  |  |  | 209 - 223 | 804.39 | 41.2  | R.LNVEVDAAPTVDLNH.V       | Deamidated: 14                    |

|  |  |  |  |           |         |       |                               |                                      |
|--|--|--|--|-----------|---------|-------|-------------------------------|--------------------------------------|
|  |  |  |  | 257 - 277 | 820.74  | 44.3  | K.QVSSSEQLQSCQ<br>AEIIELR.R.T | Carbamidomethyl:<br>12               |
|  |  |  |  | 278 - 293 | 917.98  | 138.5 | R.TVNALEVELQAQHN<br>LR.D      |                                      |
|  |  |  |  | 278 - 293 | 918.46  | 122.2 | R.TVNALEVELQAQHN<br>LR.D      | Deamidated: 10                       |
|  |  |  |  | 278 - 293 | 918.48  | 99.6  | R.TVNALEVELQAQHN<br>LR.D      | Deamidated: 3                        |
|  |  |  |  | 92 - 108  | 1072.43 | 77.8  | R.SQQQEPLVCPNYQ<br>SYFR.T     | Carbamidomethyl: 9                   |
|  |  |  |  | 92 - 108  | 1073    | 45.1  | R.SQQQEPLVCPNYQ<br>SYFR.T     | Carbamidomethyl:<br>9; Deamidated: 2 |
