# Supplementary material for: Ionic liquid-assisted extraction of wool keratin proteins as an aid to MS identification
Source: Royal Society of Chemistry journal article supplement (doi:10.1039/c4ay01251h), 2014-01-01
Supplement: c4ay01251h4.pdf [file c4ay01251h4.pdf]

**Supplementary Table 4. Proteins and peptides identified Ionic Liquid/(Urea/thourea) extract Fraction 1.**

| Protein  | Accession    | Mol Wgt (kDa) | Protein Score | Range     | m/z meas. | Peptide score          | Sequence                 | Modifications         |      |              |                                  |
|----------|--------------|---------------|---------------|-----------|-----------|------------------------|--------------------------|-----------------------|------|--------------|----------------------------------|
| KAP6.1   | gij284080740 | 8.3           | 214           | 32 - 43   | 632.27    | 83.6                   | R.SLCGSGYGYGSR.S         | Carbamidomethyl: 3    |      |              |                                  |
|          |              |               |               | 18 - 31   | 727.31    | 45.9                   | Y.SYGGLGCGYGYGSR.S       | Carbamidomethyl: 7    |      |              |                                  |
|          |              |               |               | 25 - 31   | 759.26    | 26.5                   | C.GYGYGSR.S              |                       |      |              |                                  |
| KAP6.3   | gij284080746 | 8.3           | 244.2         | 36 - 50   | 566.28    | 78.4                   | R.RLGCYGYGSCYGS<br>GFR.R | Carbamidomethyl: 4, 9 |      |              |                                  |
|          |              |               |               | 40 - 50   | 605.78    | 80.8                   | C.GYGSCYGS<br>GFR.R      | Carbamidomethyl: 5    |      |              |                                  |
|          |              |               |               | 37 - 50   | 770.82    | 85                     | R.LGCGYGYGSCYGS<br>FR.R  | Carbamidomethyl: 3, 8 |      |              |                                  |
| K86-like | gij312283584 | 53.2          | 5822.8        | 34 - 39   | 378.16    | 29.4                   | R.GISCYR.G               | Carbamidomethyl: 4    |      |              |                                  |
|          |              |               |               | 273 - 279 | 393.75    | 25.9                   | D.NIVAEIK.A              |                       |      |              |                                  |
|          |              |               |               | 117 - 123 | 406.27    | 52.8                   | R.FAAFIDK.V              |                       |      |              |                                  |
|          |              |               |               | 40 - 48   | 426.23    | 56.9                   | R.GLTGGFGSR.S            |                       |      |              |                                  |
|          |              |               |               | 192 - 201 | 436.28    | 49.9                   | K.KRYEEEEIALR.A          |                       |      |              |                                  |
|          |              |               |               | 249 - 256 | 441.76    | 45.8                   | R.VLQAHISD.T             |                       |      |              |                                  |
|          |              |               |               | 476 - 484 | 445.78    | 98.1                   | R.VGGSILGCK.K            | Carbamidomethyl: 8    |      |              |                                  |
|          |              |               |               | 215 - 221 | 448.74    | 45.6                   | D.VDCAYLR.K              | Carbamidomethyl: 3    |      |              |                                  |
|          |              |               |               | 126 - 132 | 453.78    | 38.1                   | R.FLEQQNK.L              |                       |      |              |                                  |
|          |              |               |               | 397 - 408 | 473.97    | 42.5                   | K.LGLDIEIATYRR.L         |                       |      |              |                                  |
|          |              |               |               | 26 - 33   | 476.27    | 37.2                   | C.CITAAPYR.G             | Carbamidomethyl: 1    |      |              |                                  |
|          |              |               |               | 242 - 248 | 476.29    | 55.1                   | R.LYEEEEIR.V             |                       |      |              |                                  |
|          |              |               |               | 299 - 310 | 478.64    | 55.7                   | R.SKCEEIKATVIR.H         | Carbamidomethyl: 3    |      |              |                                  |
|          |              |               |               | 254 - 262 | 481.32    | 73.4                   | H.ISDTSVIVK.M            |                       |      |              |                                  |
|          |              |               |               | 138 - 144 | 484.75    | 45.1                   | K.LQFYQNR.Q              |                       |      |              |                                  |
|          |              |               |               | 138 - 144 | 485.29    | 41.2                   | K.LQFYQNR.Q              | Deamidated: 6         |      |              |                                  |
|          |              |               |               | 409 - 416 | 487.26    | 77.4                   | R.LLEGEEQR.L             |                       |      |              |                                  |
|          |              |               |               | 332 - 340 | 487.77    | 52.9                   | R.LTAEVENAK.C            |                       |      |              |                                  |
|          |              |               |               |           |           |                        | 380 - 387                | 497.76                | 58   | K.QDMACLK.E  | Carbamidomethyl: 5; Oxidation: 3 |
|          |              |               |               |           |           |                        | 214 - 221                | 506.28                | 41.2 | K.DVDCAYLK.R | Carbamidomethyl: 4               |
|          |              |               | 291 - 298     | 506.29    | 45        | R.AEAESWYR.S           |                          |                       |      |              |                                  |
|          |              |               | 11 - 24       | 507.9     | 44.6      | P.AFSCVSACGPRP<br>GR.C | Carbamidomethyl: 4, 8    |                       |      |              |                                  |
|          |              |               | 320 - 327     | 508.79    | 37.3      | K.EEINELNR.V           |                          |                       |      |              |                                  |
|          |              |               | 194 - 201     | 511.79    | 62.3      | R.YEEEEIALR.A          |                          |                       |      |              |                                  |
|          |              |               | 280 - 288     | 524.28    | 51        | K.AHYDDIASR.S          |                          |                       |      |              |                                  |
|          |              |               | 117 - 125     | 533.85    | 68.2      | R.FAAFIDKVR.F          |                          |                       |      |              |                                  |
|          |              |               | 368 - 377     | 536.28    | 87.2      | K.LAGLEEALQK.A         |                          |                       |      |              |                                  |
|          |              |               | 409 - 417     | 543.85    | 48.9      | R.LLEGEEQRL.C          |                          |                       |      |              |                                  |
|          |              |               | 25 - 33       | 556.32    | 53.3      | R.CCITAAPYR.G          | Carbamidomethyl: 1, 2    |                       |      |              |                                  |
|          |              |               | 388 - 396     | 564.29    | 56        | K.EYQEVMSK.L           |                          |                       |      |              |                                  |
|          |              |               | 408 - 416     | 565.32    | 39.4      | R.RLLEGEEQR.L          |                          |                       |      |              |                                  |
|          |              |               | 331 - 340     | 565.82    | 43.4      | Q.RLTAEVENAK.C         |                          |                       |      |              |                                  |
|          |              |               | 213 - 221     | 570.29    | 38.8      | K.KDVDCAYLK.R          | Carbamidomethyl: 5       |                       |      |              |                                  |
|          |              |               | 318 - 331     | 581.32    | 40.2      | R.TKEEINELNRVIQR<br>.L |                          |                       |      |              |                                  |

|  |  |  |  |           |        |       |                               |                                             |
|--|--|--|--|-----------|--------|-------|-------------------------------|---------------------------------------------|
|  |  |  |  | 378 - 387 | 589.31 | 41.6  | K.AKQDMACLLK.E                | Carbamidomethyl: 7                          |
|  |  |  |  | 193 - 201 | 589.83 | 61.2  | K.RYEEEEIALR.A                |                                             |
|  |  |  |  | 202 - 212 | 596.85 | 86.2  | R.ATAENEFVALK.K               |                                             |
|  |  |  |  | 8 - 24    | 596.94 | 39.1  | R.AVPAFSCVSACG<br>PRPGR.C     | Carbamidomethyl:<br>7, 11                   |
|  |  |  |  | 378 - 387 | 597.31 | 52.2  | K.AKQDMACLLK.E                | Carbamidomethyl:<br>7; Oxidation: 5         |
|  |  |  |  | 202 - 212 | 597.33 | 57.3  | R.ATAENEFVALK.K               | Deamidated: 5                               |
|  |  |  |  | 165 - 175 | 597.73 | 82.5  | R.EAECAEADSGR.L               | Carbamidomethyl: 4                          |
|  |  |  |  | 367 - 377 | 600.36 | 88.3  | C.KLAGLEEALQK.A               |                                             |
|  |  |  |  | 231 - 240 | 603.4  | 48.5  | E.ALIQETDFLR.R                |                                             |
|  |  |  |  | 301 - 310 | 609.8  | 52.9  | K.CEEIKATVIR.H                | Carbamidomethyl: 1                          |
|  |  |  |  | 421 - 432 | 617.81 | 54.2  | G.VGAVNVCVSSSR.<br>G          | Carbamidomethyl: 7                          |
|  |  |  |  | 318 - 327 | 623.34 | 77    | R.TKEEINELNR.V                |                                             |
|  |  |  |  | 318 - 327 | 623.8  | 53.4  | R.TKEEINELNR.V                | Deamidated: 6                               |
|  |  |  |  | 289 - 298 | 627.79 | 69.4  | R.SRAEAESWYR.S                |                                             |
|  |  |  |  | 269 - 279 | 630.34 | 67.8  | D.LNMDNIVAEIK.A               |                                             |
|  |  |  |  | 397 - 407 | 632.4  | 104.4 | K.LGLDIEIATYR.R               |                                             |
|  |  |  |  | 368 - 379 | 635.9  | 63.4  | K.LAGLEEALQKAK.<br>Q          |                                             |
|  |  |  |  | 269 - 279 | 638.35 | 35.6  | D.LNMDNIVAEIK.A               | Oxidation: 3                                |
|  |  |  |  | 420 - 432 | 646.29 | 59.3  | E.GVGAVNVCVSSS<br>R.G         | Carbamidomethyl: 8                          |
|  |  |  |  | 202 - 213 | 660.86 | 84.3  | R.ATAENEFVALKK.<br>D          |                                             |
|  |  |  |  | 244 - 248 | 675.25 | 25    | Y.EEEIR.V                     |                                             |
|  |  |  |  | 268 - 279 | 687.91 | 87.4  | R.DLNMDNIVAEIK.A              |                                             |
|  |  |  |  | 268 - 279 | 695.89 | 64.6  | R.DLNMDNIVAEIK.A              | Oxidation: 4                                |
|  |  |  |  | 92 - 103  | 700.88 | 36.4  | L.NLEIDPNAQCVK.Q              | Carbamidomethyl:<br>10                      |
|  |  |  |  | 317 - 327 | 701.34 | 54.4  | R.RTKEEINELNR.V               |                                             |
|  |  |  |  | 419 - 432 | 710.81 | 48.8  | C.EGVGAVNVCVSS<br>SR.G        | Carbamidomethyl: 9                          |
|  |  |  |  | 357 - 377 | 729.41 | 25.4  | Q.GEAALADAKCKLA<br>GLEEALQK.A | Carbamidomethyl:<br>10                      |
|  |  |  |  | 223 - 241 | 740.42 | 30.1  | K.SDLEANVEALIQE<br>TDFLR.L    |                                             |
|  |  |  |  | 126 - 137 | 745.89 | 59.5  | R.FLEQQNKLETK.L               |                                             |
|  |  |  |  | 249 - 262 | 755.47 | 74.4  | R.VLQAHISDTSVIVK<br>.M        |                                             |
|  |  |  |  | 368 - 381 | 757.42 | 53.6  | K.LAGLEEALQKAKQ<br>D.M        |                                             |
|  |  |  |  | 462 - 475 | 761.84 | 62.2  | N.VVVGTSDFVCSPC<br>SR.V       | Carbamidomethyl:<br>9, 12                   |
|  |  |  |  | 133 - 144 | 776.94 | 66.3  | K.LLETKLQFYQNR.<br>Q          |                                             |
|  |  |  |  | 222 - 241 | 783.08 | 42.9  | R.KSDLEANVEALIQ<br>ETDFLR.L   |                                             |
|  |  |  |  | 126 - 144 | 814.79 | 33.6  | R.FLEQQNKLETKL<br>QFYQNR.Q    | Deamidated: 4, 6                            |
|  |  |  |  | 144 - 163 | 825.07 | 35.4  | N.RQCCESNLEPLFS<br>GYIETLR.R  | Carbamidomethyl:<br>3, 4; Deamidated: 2     |
|  |  |  |  | 202 - 216 | 825.44 | 47.4  | R.ATAENEFVALKKD<br>VD.C       |                                             |
|  |  |  |  | 417 - 432 | 847.41 | 132.1 | R.LCEGVGAVNVCV<br>SSSR.G      | Carbamidomethyl:<br>2, 11                   |
|  |  |  |  | 417 - 432 | 847.92 | 33.8  | R.LCEGVGAVNVCV<br>SSSR.G      | Carbamidomethyl:<br>2, 11; Deamidated:<br>9 |

|                |              |      |        |           |         |       |                                           |                                                  |
|----------------|--------------|------|--------|-----------|---------|-------|-------------------------------------------|--------------------------------------------------|
|                |              |      |        | 149 - 163 | 869.98  | 56.4  | E.SNLEPLFSGYIETL<br>R.R                   |                                                  |
|                |              |      |        | 176 - 191 | 904.98  | 119.8 | R.LSSELNSLQEVLE<br>GYK.K                  |                                                  |
|                |              |      |        | 176 - 191 | 905.46  | 84.4  | R.LSSELNSLQEVLE<br>GYK.K                  | Deamidated: 6                                    |
|                |              |      |        | 176 - 191 | 905.97  | 33.2  | R.LSSELNSLQEVLE<br>GYK.K                  | Deamidated: 6, 9                                 |
|                |              |      |        | 346 - 363 | 907.93  | 96.5  | K.LEAAVTQAEQQG<br>EAALAD.A                |                                                  |
|                |              |      |        | 225 - 240 | 931     | 120.1 | D.LEANVEALIQETD<br>FLR.R                  |                                                  |
|                |              |      |        | 176 - 192 | 969.01  | 72.3  | R.LSSELNSLQEVLE<br>GYKK.R                 |                                                  |
|                |              |      |        | 346 - 365 | 1007.49 | 152.8 | K.LEAAVTQAEQQG<br>EAALADAK.C              |                                                  |
|                |              |      |        | 346 - 365 | 1008    | 66.9  | K.LEAAVTQAEQQG<br>EAALADAK.C              | Deamidated: 7                                    |
|                |              |      |        | 86 - 103  | 1013.02 | 82.3  | E.SLLTPLNLEIDPNA<br>QCVK.Q                | Carbamidomethyl:<br>16                           |
|                |              |      |        | 223 - 240 | 1032.01 | 114.9 | K.SDLEANVEALIQE<br>TDFLR.R                |                                                  |
|                |              |      |        | 223 - 240 | 1032.55 | 73.3  | K.SDLEANVEALIQE<br>TDFLR.R                | Deamidated: 12                                   |
|                |              |      |        | 223 - 240 | 1032.58 | 69.8  | K.SDLEANVEALIQE<br>TDFLR.R                | Deamidated: 6                                    |
|                |              |      |        | 222 - 240 | 1096.05 | 175.6 | R.KSDLEANVEALIQ<br>ETDFLR.R               |                                                  |
|                |              |      |        | 145 - 163 | 1158.51 | 102.2 | R.QCCESNLEPLFSG<br>YIETLR.R               | Carbamidomethyl:<br>2, 3                         |
| K32<br>Partial | gij999000056 | 41.8 | 1096.3 | 132 - 138 | 404.21  | 58.2  | K.LAADDFR.S                               |                                                  |
|                |              |      |        | 286 - 292 | 408.78  | 47.1  | E.SQLAEIR.C                               |                                                  |
|                |              |      |        | 141 - 148 | 490.8   | 57.4  | K.YETELGLR.Q                              |                                                  |
|                |              |      |        | 105 - 112 | 494.8   | 59.2  | K.TIEELQKK.I                              |                                                  |
|                |              |      |        | 123 - 131 | 515.35  | 64.7  | R.IVVQIDNTK.L                             |                                                  |
|                |              |      |        | 321 - 329 | 518.78  | 37.5  | R.GLLDSEDCK.L                             | Carbamidomethyl: 8                               |
|                |              |      |        | 161 - 169 | 552.87  | 78    | R.ILDELTLCK.A                             | Carbamidomethyl: 8                               |
|                |              |      |        | 54 - 62   | 554.3   | 49.7  | K.ETLQLNSR.L                              |                                                  |
|                |              |      |        | 139 - 148 | 598.35  | 67.7  | R.SKYETELGLR.Q                            |                                                  |
|                |              |      |        | 160 - 169 | 630.9   | 43.1  | R.RILDELTLCK.A                            | Carbamidomethyl: 9                               |
|                |              |      |        | 258 - 269 | 682.37  | 87.7  | D.SLENTLTETEAR.Y<br>R.DSLENTLTETEAR.<br>Y |                                                  |
|                |              |      |        | 257 - 269 | 739.87  | 99.4  | R.DSLENTLTETEAR.<br>Y                     | Deamidated: 5                                    |
|                |              |      |        | 269 - 292 | 907.8   | 34.9  | A.RYASQLAQMQL<br>VTNVESQLAEIR.C           | Oxidation: 9                                     |
|                |              |      |        | 269 - 292 | 909.48  | 25.7  | A.RYASQLAQMQL<br>VTNVESQLAEIR.C           | Oxidation: 9;<br>Deamidated: 5, 8,<br>10, 15, 19 |
|                |              |      |        | 268 - 292 | 931.77  | 27.1  | E.ARYASQLAQMQL<br>LVTNVESQLAEIR.C         | Oxidation: 10;<br>Deamidated: 11                 |
|                |              |      |        | 241 - 256 | 941.96  | 67.7  | R.TVDTLEIELQTQH<br>SLR.D                  |                                                  |
| K33b           | gij999000003 | 45.9 | 4453.2 | 241 - 246 | 366.2   | 47.5  | R.VLNETR.A                                |                                                  |
|                |              |      |        | 153 - 159 | 404.21  | 58.2  | K.LAADDFR.T                               |                                                  |
|                |              |      |        | 234 - 240 | 407.76  | 34.1  | A.PTVDLNR.V                               |                                                  |
|                |              |      |        | 340 - 346 | 408.78  | 47.1  | E.SQLAEIR.S                               |                                                  |
|                |              |      |        | 84 - 90   | 412.26  | 54    | R.LASYLEK.V                               |                                                  |
|                |              |      |        | 24 - 30   | 423.78  | 40.5  | C.LPNLSFR.S                               |                                                  |

|  |  |  |  |           |        |      |                           |                     |
|--|--|--|--|-----------|--------|------|---------------------------|---------------------|
|  |  |  |  | 120 - 125 | 432.21 | 35.7 | N.YQSYFR.T                |                     |
|  |  |  |  | 170 - 181 | 467.26 | 25.4 | R.QLVESDINGLRR.I          |                     |
|  |  |  |  | 97 - 104  | 474.25 | 45   | R.ENAELESR.I              |                     |
|  |  |  |  | 247 - 258 | 483.93 | 60.5 | R.AQYEALVETNRR.<br>D      |                     |
|  |  |  |  | 83 - 90   | 490.3  | 48.4 | D.RLASYLEK.V              |                     |
|  |  |  |  | 126 - 133 | 494.8  | 59.2 | R.TIEELQQK.I              |                     |
|  |  |  |  | 260 - 266 | 497.74 | 53.7 | D.VEEWYIR.Q               |                     |
|  |  |  |  | 144 - 152 | 500.33 | 65.5 | R.LVVQIDNAK.L             |                     |
|  |  |  |  | 144 - 152 | 500.84 | 72.8 | R.LVVQIDNAK.L             | Deamidated: 7       |
|  |  |  |  | 23 - 30   | 503.83 | 37   | F.CLPNLSFR.S              | Carbamidomethyl: 1  |
|  |  |  |  | 193 - 201 | 508.8  | 49.9 | D.LEAQVESLK.E             |                     |
|  |  |  |  | 231 - 240 | 536.28 | 49.7 | V.DAAPTVDLNR.V            |                     |
|  |  |  |  | 118 - 125 | 537.77 | 51.4 | C.PNYQSYFR.T              |                     |
|  |  |  |  | 84 - 92   | 539.84 | 72.4 | R.LASYLEKVR.Q             |                     |
|  |  |  |  | 182 - 190 | 552.87 | 78   | R.ILDELTLCK.S             | Carbamidomethyl: 8  |
|  |  |  |  | 259 - 266 | 555.28 | 54.7 | R.DVEEWYIR.Q              |                     |
|  |  |  |  | 232 - 246 | 557.01 | 28.9 | D.AAPTVDLNRVLNE<br>TR.A   |                     |
|  |  |  |  | 366 - 374 | 562.78 | 65.1 | R.LESEINTYR.G             |                     |
|  |  |  |  | 125 - 133 | 572.83 | 35   | F.RTIEELQQK.I             |                     |
|  |  |  |  | 22 - 30   | 577.31 | 46.4 | N.FCLPNLSFR.S             | Carbamidomethyl: 2  |
|  |  |  |  | 75 - 83   | 577.32 | 62.9 | K.ETMQFLNDR.L             |                     |
|  |  |  |  | 75 - 83   | 585.29 | 55.9 | K.ETMQFLNDR.L             | Oxidation: 3        |
|  |  |  |  | 366 - 375 | 591.31 | 51   | R.LESEINTYRG.L            |                     |
|  |  |  |  | 225 - 240 | 594.69 | 35.8 | D.RLNVEVDAAPTVD<br>LNR.V  |                     |
|  |  |  |  | 144 - 159 | 596.68 | 52.8 | R.LVVQIDNAKLAAD<br>DFR.T  |                     |
|  |  |  |  | 160 - 169 | 604.83 | 56.9 | R.TKYQTELGLR.Q            |                     |
|  |  |  |  | 160 - 169 | 605.35 | 68   | R.TKYQTELGLR.Q            | Deamidated: 4       |
|  |  |  |  | 191 - 201 | 609.83 | 82   | K.SDLEAQVESLK.E           |                     |
|  |  |  |  | 199 - 208 | 616.89 | 48   | E.SLKEELICLK.Q            | Carbamidomethyl: 8  |
|  |  |  |  | 226 - 237 | 621.85 | 50.9 | R.LNVEVDAAPTVD.<br>L      |                     |
|  |  |  |  | 352 - 361 | 625.33 | 35.2 | R.QNQEQVLLD.V             |                     |
|  |  |  |  | 181 - 190 | 630.9  | 43.1 | R.RILDELTLCK.S            | Carbamidomethyl: 9  |
|  |  |  |  | 258 - 266 | 633.32 | 51.7 | R.RDVEEWYIR.Q             |                     |
|  |  |  |  | 21 - 30   | 634.39 | 37   | Y.NFCLPNLSFR.S            | Carbamidomethyl: 3  |
|  |  |  |  | 64 - 74   | 644.79 | 40.4 | W.FCEGSFNGNEK.E           | Carbamidomethyl: 2  |
|  |  |  |  | 247 - 257 | 647.33 | 94.8 | R.AQYEALVETNR.R           |                     |
|  |  |  |  | 109 - 119 | 650.34 | 50.2 | R.SQQQEPLVCPN.Y           | Carbamidomethyl: 9  |
|  |  |  |  | 294 - 310 | 664.41 | 75.2 | R.RTVNALEVELQAQ<br>HNLR.D |                     |
|  |  |  |  | 220 - 231 | 672.88 | 26.9 | R.SQLGDRLNVEVD.<br>A      |                     |
|  |  |  |  | 364 - 374 | 676.37 | 77   | R.ARLESEINTYR.G           |                     |
|  |  |  |  | 312 - 323 | 682.37 | 87.7 | D.SLENTLTETEAR.Y          |                     |
|  |  |  |  | 209 - 219 | 684.31 | 67.7 | K.QNHEQEVNTLR.S           |                     |
|  |  |  |  | 209 - 219 | 685.77 | 45.1 | K.QNHEQEVNTLR.S           | Deamidated: 1, 2, 5 |
|  |  |  |  | 246 - 257 | 725.38 | 61.3 | T.RAQYEALVETNR.<br>R      |                     |
|  |  |  |  | 247 - 258 | 725.87 | 27.6 | R.AQYEALVETNRR.<br>D      | Deamidated: 10      |
|  |  |  |  | 197 - 208 | 730.94 | 75.6 | Q.VESLKEELICLK.Q          | Carbamidomethyl: 10 |

|     |  |      |        |           |         |       |                                 |                                       |
|-----|--|------|--------|-----------|---------|-------|---------------------------------|---------------------------------------|
|     |  |      |        | 311 - 323 | 739.87  | 99.4  | R.DSLENTLTETEAR.<br>Y           |                                       |
|     |  |      |        | 311 - 323 | 740.35  | 93.3  | R.DSLENTLTETEAR.<br>Y           | Deamidated: 5                         |
|     |  |      |        | 352 - 363 | 752.93  | 100.2 | R.QNQEQVLLDVR.<br>A             |                                       |
|     |  |      |        | 352 - 363 | 753.41  | 63.1  | R.QNQEQVLLDVR.<br>A             | Deamidated: 2                         |
|     |  |      |        | 298 - 310 | 760.89  | 80.4  | N.ALEVELQAQHNLR<br>.D           |                                       |
|     |  |      |        | 220 - 240 | 761.41  | 32    | R.SQLGDRLNVEVD<br>AAPTVDLNR.V   |                                       |
|     |  |      |        | 126 - 138 | 764.46  | 54    | R.TIEELQKILANK.<br>A            |                                       |
|     |  |      |        | 333 - 346 | 785.98  | 54.8  | Q.SLIVNVESQLAEIR<br>.S          |                                       |
|     |  |      |        | 226 - 240 | 813.44  | 97    | R.LNVEVDAAPTVDL<br>NR.V         |                                       |
|     |  |      |        | 274 - 294 | 821.77  | 34    | K.QVVSSSEQLQSY<br>QAEIILRR.T    |                                       |
|     |  |      |        | 191 - 205 | 851.95  | 56.1  | K.SDLEAQVESLKEE<br>LI.C         |                                       |
|     |  |      |        | 324 - 346 | 888.79  | 36    | R.YSCQLSQVQSLIV<br>NVESQLAEIR.S | Carbamidomethyl: 3                    |
|     |  |      |        | 324 - 346 | 889.12  | 32    | R.YSCQLSQVQSLIV<br>NVESQLAEIR.S | Carbamidomethyl:<br>3; Deamidated: 14 |
|     |  |      |        | 295 - 310 | 918.01  | 119.5 | R.TVNALEVELQAQH<br>NLR.D        |                                       |
|     |  |      |        | 193 - 208 | 951.56  | 91.5  | D.LEAQVESLKEELIC<br>LK.Q        | Carbamidomethyl:<br>14                |
|     |  |      |        | 295 - 311 | 975.49  | 35    | R.TVNALEVELQAQH<br>NLRD.S       |                                       |
|     |  |      |        | 191 - 208 | 1052.61 | 101.7 | K.SDLEAQVESLKEE<br>LICK.Q       | Carbamidomethyl:<br>16                |
|     |  |      |        | 191 - 208 | 1053.06 | 61.2  | K.SDLEAQVESLKEE<br>LICK.Q       | Carbamidomethyl:<br>16; Deamidated: 6 |
|     |  |      |        | 109 - 125 | 1072.49 | 72.8  | R.SQQQEPLVCPNY<br>QSYFR.T       | Carbamidomethyl: 9                    |
|     |  | 49.7 | 1948.7 | 327 - 346 | 1128.09 | 63.5  | C.QLSQVQSLIVNVE<br>SQLAEIR.S    | Deamidated: 6                         |
| K35 |  |      |        | 176 - 182 | 404.21  | 58.2  | K.LAADDFR.T                     |                                       |
|     |  |      |        | 363 - 369 | 408.78  | 47.1  | E.SQLAEIR.C                     |                                       |
|     |  |      |        | 107 - 113 | 412.26  | 54    | R.LASYLEK.V                     |                                       |
|     |  |      |        | 7 - 15    | 442.25  | 36.2  | K.ASFSSGSLK.V                   |                                       |
|     |  |      |        | 120 - 127 | 474.25  | 45    | R.ENAELESR.I                    |                                       |
|     |  |      |        | 106 - 113 | 490.3   | 48.4  | D.RLASYLEK.V                    |                                       |
|     |  |      |        | 149 - 156 | 494.8   | 59.2  | Q.TIEELQKK.I                    |                                       |
|     |  |      |        | 167 - 175 | 500.33  | 65.5  | R.LVVQIDNAK.L                   |                                       |
|     |  |      |        | 167 - 175 | 500.84  | 72.8  | R.LVVQIDNAK.L                   | Deamidated: 7                         |
|     |  |      |        | 216 - 224 | 508.8   | 49.9  | D.LEAQVESLK.E                   |                                       |
|     |  |      |        | 398 - 406 | 518.78  | 37.5  | R.GLLDSEDCK.L                   | Carbamidomethyl: 8                    |
|     |  |      |        | 270 - 281 | 527.94  | 31.2  | R.CQYETLVENRR.<br>E             | Carbamidomethyl: 1                    |
|     |  |      |        | 107 - 115 | 539.84  | 72.4  | R.LASYLEKVR.Q                   |                                       |
|     |  |      |        | 47 - 57   | 556.8   | 46.6  | R.SFSACSVGLGK.S                 | Carbamidomethyl: 5                    |
|     |  |      |        | 98 - 106  | 577.32  | 62.9  | K.ETMQFLNDR.L                   |                                       |
|     |  |      |        | 98 - 106  | 585.29  | 55.9  | K.ETMQFLNDR.L                   | Oxidation: 3                          |
|     |  |      |        | 389 - 397 | 585.79  | 32.2  | R.LECEISTYR.G                   | Carbamidomethyl: 3                    |
|     |  |      |        | 167 - 182 | 596.68  | 52.8  | R.LVVQIDNAKLAAD<br>DFR.T        |                                       |
|     |  |      |        | 27 - 37   | 601.82  | 38.8  | R.VSTIFSSSSCK.L                 | Carbamidomethyl:                      |

|     |              |      |        |           |        |       |                             |                                        |
|-----|--------------|------|--------|-----------|--------|-------|-----------------------------|----------------------------------------|
|     |              |      |        |           |        |       |                             | 10                                     |
|     |              |      |        | 222 - 231 | 616.89 | 48    | E.SLKEELLCLK.K              | Carbamidomethyl: 8                     |
|     |              |      |        | 375 - 384 | 625.33 | 35.2  | R.QNQEYQVLLD.V              |                                        |
|     |              |      |        | 183 - 192 | 629.33 | 33    | R.TKYETEVTMR.Q              |                                        |
|     |              |      |        | 183 - 192 | 637.3  | 58.4  | R.TKYETEVTMR.Q              | Oxidation: 9                           |
|     |              |      |        | 335 - 346 | 645.84 | 67    | D.ALESTLAETEAR.Y            |                                        |
|     |              |      |        | 334 - 346 | 703.36 | 89.5  | R.DALESTLAETEAR.Y           |                                        |
|     |              |      |        | 220 - 231 | 730.94 | 75.6  | Q.VESLKEELLCLK.K            | Carbamidomethyl: 10                    |
|     |              |      |        | 375 - 386 | 752.93 | 100.2 | R.QNQEYQVLLDVR.A            |                                        |
|     |              |      |        | 375 - 386 | 753.41 | 63.1  | R.QNQEYQVLLDVR.A            | Deamidated: 2                          |
|     |              |      |        | 249 - 263 | 811.47 | 39.8  | R.LNVEVDAAPPVDLNR.V         |                                        |
|     |              |      |        | 297 - 317 | 821.77 | 34    | Q.QVVSSSEQLQSYQAEIELRR.T    |                                        |
|     |              |      |        | 346 - 369 | 904.49 | 42    | A.RYSSQLAQMQLIGNVESQLAEIR.C | Oxidation: 9; Deamidated: 5, 8, 10, 15 |
|     |              |      |        | 216 - 231 | 951.56 | 91.5  | D.LEAQVESLKEELLCLK.K        | Carbamidomethyl: 14                    |
| K81 | gij999000007 | 55.1 | 5554.6 | 33 - 38   | 378.16 | 29.4  | R.GISCYR.G                  | Carbamidomethyl: 4                     |
|     |              |      |        | 273 - 279 | 393.75 | 25.9  | D.NIVAEIK.A                 |                                        |
|     |              |      |        | 116 - 122 | 406.27 | 52.8  | R.FAAFIDK.V                 |                                        |
|     |              |      |        | 39 - 47   | 426.23 | 56.9  | R.GLTGGFGSR.S               |                                        |
|     |              |      |        | 249 - 256 | 441.76 | 45.8  | R.VLQAHISD.T                |                                        |
|     |              |      |        | 215 - 221 | 448.74 | 45.6  | D.VDCAYLR.K                 | Carbamidomethyl: 3                     |
|     |              |      |        | 125 - 131 | 453.78 | 38.1  | R.FLEQQNK.L                 |                                        |
|     |              |      |        | 397 - 408 | 473.97 | 42.5  | K.LGLDIEIATYRR.L            |                                        |
|     |              |      |        | 25 - 32   | 476.27 | 37.2  | C.CITAAPYR.G                | Carbamidomethyl: 1                     |
|     |              |      |        | 242 - 248 | 476.29 | 55.1  | R.LYEEEEIR.V                |                                        |
|     |              |      |        | 299 - 310 | 478.64 | 55.7  | R.SKCEEIKATVIR.H            | Carbamidomethyl: 3                     |
|     |              |      |        | 254 - 262 | 481.32 | 73.4  | H.ISDTSVIVK.M               |                                        |
|     |              |      |        | 137 - 143 | 484.75 | 45.1  | K.LQFYQNR.Q                 |                                        |
|     |              |      |        | 137 - 143 | 485.29 | 41.2  | K.LQFYQNR.Q                 | Deamidated: 6                          |
|     |              |      |        | 409 - 416 | 487.26 | 77.4  | R.LLEGQEQR.L                | Deamidated: 5                          |
|     |              |      |        | 332 - 340 | 487.77 | 52.9  | R.LTAEVENAK.C               |                                        |
|     |              |      |        | 380 - 387 | 497.76 | 58    | K.QDMACLLK.E                | Carbamidomethyl: 5; Oxidation: 3       |
|     |              |      |        | 194 - 201 | 504.8  | 61.9  | R.YEEVALR.A                 |                                        |
|     |              |      |        | 214 - 221 | 506.28 | 41.2  | K.DVDCAYLR.K                | Carbamidomethyl: 4                     |
|     |              |      |        | 291 - 298 | 506.29 | 45    | R.AEAESWYR.S                |                                        |
|     |              |      |        | 10 - 23   | 507.9  | 44.6  | R.AFSCVSACGPRPGR.C          | Carbamidomethyl: 4, 8                  |
|     |              |      |        | 320 - 327 | 508.79 | 37.3  | K.EEINELNR.V                |                                        |
|     |              |      |        | 280 - 288 | 519.79 | 74.7  | K.AQYDDIASR.S               |                                        |
|     |              |      |        | 116 - 124 | 533.85 | 68.2  | R.FAAFIDKVR.F               |                                        |
|     |              |      |        | 368 - 377 | 536.28 | 87.2  | K.LAGLEEALQK.A              |                                        |
|     |              |      |        | 409 - 417 | 543.85 | 48.9  | R.LLEGQEQR.L                | Deamidated: 5                          |
|     |              |      |        | 24 - 32   | 556.32 | 53.3  | R.CCITAAPYR.G               | Carbamidomethyl: 1, 2                  |
|     |              |      |        | 388 - 396 | 564.29 | 56    | K.EYQEVMSK.L                |                                        |
|     |              |      |        | 408 - 416 | 565.32 | 39.4  | R.RLLEGQEQR.L               | Deamidated: 6                          |
|     |              |      |        | 331 - 340 | 565.82 | 43.4  | Q.RLTAEVENAK.C              |                                        |
|     |              |      |        | 213 - 221 | 570.29 | 38.8  | K.KDVDCAYLR.K               | Carbamidomethyl: 5                     |

|  |  |  |  |           |        |       |                          |                                      |
|--|--|--|--|-----------|--------|-------|--------------------------|--------------------------------------|
|  |  |  |  | 318 - 331 | 581.32 | 40.2  | R.TKEEINELNRVIQR.L       |                                      |
|  |  |  |  | 193 - 201 | 582.83 | 61.5  | R.RYEEEEVALR.A           |                                      |
|  |  |  |  | 378 - 387 | 589.31 | 41.6  | K.AKQDMACLLK.E           | Carbamidomethyl: 7                   |
|  |  |  |  | 202 - 212 | 596.85 | 86.2  | R.ATAENEFVALK.K          |                                      |
|  |  |  |  | 378 - 387 | 597.31 | 52.2  | K.AKQDMACLLK.E           | Carbamidomethyl: 7; Oxidation: 5     |
|  |  |  |  | 202 - 212 | 597.33 | 57.3  | R.ATAENEFVALK.K          | Deamidated: 5                        |
|  |  |  |  | 164 - 174 | 597.73 | 82.5  | R.EAECAEADSGR.L          | Carbamidomethyl: 4                   |
|  |  |  |  | 367 - 377 | 600.36 | 88.3  | R.KLAGLEEALQK.A          |                                      |
|  |  |  |  | 231 - 240 | 603.4  | 48.5  | E.ALIQETDFLR.R           |                                      |
|  |  |  |  | 10 - 20   | 606.28 | 77.3  | R.AFSCVSACGPR.P          | Carbamidomethyl: 4, 8                |
|  |  |  |  | 301 - 310 | 609.8  | 52.9  | K.CEEIKATVIR.H           | Carbamidomethyl: 1                   |
|  |  |  |  | 318 - 327 | 623.34 | 77    | R.TKEEINELNR.V           |                                      |
|  |  |  |  | 318 - 327 | 623.8  | 53.4  | R.TKEEINELNR.V           | Deamidated: 6                        |
|  |  |  |  | 289 - 298 | 627.79 | 69.4  | R.SRAEAEHWYR.S           |                                      |
|  |  |  |  | 269 - 279 | 630.34 | 67.8  | D.LNMDNIVAEIK.A          |                                      |
|  |  |  |  | 397 - 407 | 632.4  | 104.4 | K.LGLDIEIATYR.R          |                                      |
|  |  |  |  | 368 - 379 | 635.9  | 63.4  | K.LAGLEEALQKAK.Q         |                                      |
|  |  |  |  | 269 - 279 | 638.35 | 35.6  | D.LNMDNIVAEIK.A          | Oxidation: 3                         |
|  |  |  |  | 202 - 213 | 660.86 | 84.3  | R.ATAENEFVALKK.D         |                                      |
|  |  |  |  | 244 - 248 | 675.25 | 25    | Y.EEEIR.V                |                                      |
|  |  |  |  | 268 - 279 | 687.91 | 87.4  | R.DLNMDNIVAEIK.A         |                                      |
|  |  |  |  | 268 - 279 | 695.89 | 64.6  | R.DLNMDNIVAEIK.A         | Oxidation: 4                         |
|  |  |  |  | 91 - 102  | 700.88 | 36.4  | L.NLEIDPNAQCVK.Q         | Carbamidomethyl: 10                  |
|  |  |  |  | 317 - 327 | 701.34 | 54.4  | R.RTKEEINELNR.V          |                                      |
|  |  |  |  | 433 - 446 | 711.84 | 103.4 | R.GGVVCGDLCVSGSR.P       | Carbamidomethyl: 5, 9                |
|  |  |  |  | 419 - 432 | 718.83 | 74.6  | C.EGVGSVNVCVSSSR.G       | Carbamidomethyl: 9                   |
|  |  |  |  | 223 - 241 | 740.42 | 30.1  | K.SDLEANVEALIQETDFLR.L   |                                      |
|  |  |  |  | 125 - 136 | 745.89 | 59.5  | R.FLEQQNKLETK.L          |                                      |
|  |  |  |  | 249 - 262 | 755.47 | 74.4  | R.VLQAHISDTSVIVK.M       |                                      |
|  |  |  |  | 368 - 381 | 757.42 | 53.6  | K.LAGLEEALQKAKQD.M       |                                      |
|  |  |  |  | 132 - 143 | 776.94 | 66.3  | K.LLETKLQFYQNR.Q         |                                      |
|  |  |  |  | 222 - 241 | 783.08 | 42.9  | R.KSDLEANVEALIQETDFLR.L  |                                      |
|  |  |  |  | 125 - 143 | 814.79 | 33.6  | R.FLEQQNKLETKLQFYQNR.Q   | Deamidated: 4, 6                     |
|  |  |  |  | 143 - 162 | 825.07 | 35.4  | N.RQCCESNLEPLFSGYIETLR.R | Carbamidomethyl: 3, 4; Deamidated: 2 |
|  |  |  |  | 202 - 216 | 825.44 | 47.4  | R.ATAENEFVALKKD.VD.C     |                                      |
|  |  |  |  | 417 - 432 | 855.39 | 126.5 | R.LCEGVGSVNVCVSSSR.G     | Carbamidomethyl: 2, 11               |
|  |  |  |  | 148 - 162 | 869.98 | 56.4  | E.SNLEPLFSGYIETLR.R      |                                      |
|  |  |  |  | 175 - 190 | 904.98 | 119.8 | R.LSSELNSLQEVLEGYK.K     |                                      |
|  |  |  |  | 175 - 190 | 905.46 | 84.4  | R.LSSELNSLQEVLEGYK.K     | Deamidated: 6                        |
|  |  |  |  | 175 - 190 | 905.97 | 33.2  | R.LSSELNSLQEVLEGYK.K     | Deamidated: 6, 9                     |

|     |              |      |        |           |         |       |                              |                                     |
|-----|--------------|------|--------|-----------|---------|-------|------------------------------|-------------------------------------|
|     |              |      |        | 346 - 363 | 907.93  | 96.5  | K.LEAAVTQAEQQG<br>EAALAD.A   |                                     |
|     |              |      |        | 225 - 240 | 931     | 120.1 | D.LEANVEALIQETD<br>FLR.R     |                                     |
|     |              |      |        | 175 - 191 | 969.01  | 72.3  | R.LSSELNSLQEVLE<br>GYKK.R    |                                     |
|     |              |      |        | 346 - 365 | 1007.49 | 152.8 | K.LEAAVTQAEQQG<br>EAALADAK.R |                                     |
|     |              |      |        | 346 - 365 | 1008    | 66.9  | K.LEAAVTQAEQQG<br>EAALADAK.R | Deamidated: 7                       |
|     |              |      |        | 85 - 102  | 1013.02 | 82.3  | E.SLLTPLNLEIDPNA<br>QCVK.Q   | Carbamidomethyl:<br>16              |
|     |              |      |        | 223 - 240 | 1032.01 | 114.9 | K.SDLEANVEALIQE<br>TDFLR.R   |                                     |
|     |              |      |        | 223 - 240 | 1032.55 | 73.3  | K.SDLEANVEALIQE<br>TDFLR.R   | Deamidated: 12                      |
|     |              |      |        | 223 - 240 | 1032.58 | 69.8  | K.SDLEANVEALIQE<br>TDFLR.R   | Deamidated: 6                       |
|     |              |      |        | 222 - 240 | 1096.05 | 175.6 | R.KSDLEANVEALIQ<br>ETDFLR.R  |                                     |
|     |              |      |        | 144 - 162 | 1158.51 | 102.2 | R.QCCESNLEPLFSG<br>YIETLR.R  | Carbamidomethyl:<br>2, 3            |
| K86 | gij999000010 | 54.8 | 5746.2 | 65 - 71   | 375.22  | 45.4  | R.IAVSGFR.A                  |                                     |
|     |              |      |        | 289 - 295 | 393.75  | 25.9  | D.NIVAEIK.A                  |                                     |
|     |              |      |        | 133 - 139 | 406.27  | 52.8  | R.FAAFIDK.V                  |                                     |
|     |              |      |        | 265 - 272 | 441.76  | 45.8  | R.VLQAHISD.T                 |                                     |
|     |              |      |        | 492 - 500 | 445.78  | 98.1  | R.VGGSILGCK.K                | Carbamidomethyl: 8                  |
|     |              |      |        | 231 - 237 | 448.74  | 45.6  | D.VDCAYLR.K                  | Carbamidomethyl: 3                  |
|     |              |      |        | 142 - 148 | 453.78  | 38.1  | R.FLEQQNK.L                  |                                     |
|     |              |      |        | 413 - 424 | 473.97  | 42.5  | K.LGLDIEIATYRR.L             |                                     |
|     |              |      |        | 258 - 264 | 476.29  | 55.1  | R.LYEEEEIR.V                 |                                     |
|     |              |      |        | 315 - 326 | 478.64  | 55.7  | R.SKCEEIKATVIR.H             | Carbamidomethyl: 3                  |
|     |              |      |        | 270 - 278 | 481.32  | 73.4  | H.ISDTSVIVK.M                |                                     |
|     |              |      |        | 154 - 160 | 484.75  | 45.1  | K.LQFYQNR.Q                  |                                     |
|     |              |      |        | 154 - 160 | 485.29  | 41.2  | K.LQFYQNR.Q                  | Deamidated: 6                       |
|     |              |      |        | 425 - 432 | 487.26  | 77.4  | R.LLEGEEQR.L                 |                                     |
|     |              |      |        | 348 - 356 | 487.77  | 52.9  | R.LTAEVENAK.C                |                                     |
|     |              |      |        | 396 - 403 | 497.76  | 58    | K.QDMACLK.E                  | Carbamidomethyl:<br>5; Oxidation: 3 |
|     |              |      |        | 210 - 217 | 504.8   | 61.9  | R.YEEVALR.A                  |                                     |
|     |              |      |        | 230 - 237 | 506.28  | 41.2  | K.DVDCAYLR.K                 | Carbamidomethyl: 4                  |
|     |              |      |        | 307 - 314 | 506.29  | 45    | R.AEAESWYR.S                 |                                     |
|     |              |      |        | 336 - 343 | 508.79  | 37.3  | K.EEINELNR.V                 |                                     |
|     |              |      |        | 296 - 304 | 524.28  | 51    | K.AHYDDIASR.S                |                                     |
|     |              |      |        | 133 - 141 | 533.85  | 68.2  | R.FAAFIDKVR.F                |                                     |
|     |              |      |        | 384 - 393 | 536.28  | 87.2  | K.LAGLEEALQK.A               |                                     |
|     |              |      |        | 425 - 433 | 543.85  | 48.9  | R.LLEGEEQRL.C                |                                     |
|     |              |      |        | 54 - 64   | 545.79  | 75.9  | R.SVSALGSCGPR.I              | Carbamidomethyl: 8                  |
|     |              |      |        | 31 - 39   | 549.29  | 50.8  | R.CCISAAPYR.G                | Carbamidomethyl:<br>1, 2            |
|     |              |      |        | 404 - 412 | 564.29  | 56    | K.EYQEVMSK.L                 |                                     |
|     |              |      |        | 424 - 432 | 565.32  | 39.4  | R.RLLEGEEQR.L                |                                     |
|     |              |      |        | 347 - 356 | 565.82  | 43.4  | Q.RLTAEVENAK.C               |                                     |
|     |              |      |        | 229 - 237 | 570.29  | 38.8  | K.KDVDCAYLR.K                | Carbamidomethyl: 5                  |
|     |              |      |        | 16 - 26   | 577.78  | 57.7  | R.TFSSCSAVAPK.T              | Carbamidomethyl: 5                  |
|     |              |      |        | 334 - 347 | 581.32  | 40.2  | R.TKEEINELNRVIQR<br>.L       |                                     |
|     |              |      |        | 209 - 217 | 582.83  | 61.5  | K.RYEEVALR.A                 |                                     |



|  |  |  |           |        |       |                          |                                       |
|--|--|--|-----------|--------|-------|--------------------------|---------------------------------------|
|  |  |  | 394 - 403 | 589.31 | 41.6  | K.AKQDMACLLK.E           | Carbamidomethyl: 7                    |
|  |  |  | 218 - 228 | 596.85 | 86.2  | R.ATAENEFVALK.K          |                                       |
|  |  |  | 394 - 403 | 597.31 | 52.2  | K.AKQDMACLLK.E           | Carbamidomethyl: 7; Oxidation: 5      |
|  |  |  | 218 - 228 | 597.33 | 57.3  | R.ATAENEFVALK.K          | Deamidated: 5                         |
|  |  |  | 181 - 191 | 597.73 | 82.5  | R.EAECAEADSGR.L          | Carbamidomethyl: 4                    |
|  |  |  | 383 - 393 | 600.36 | 88.3  | C.KLAGLEELQK.A           |                                       |
|  |  |  | 247 - 256 | 603.4  | 48.5  | E.ALIQETDFLR.R           |                                       |
|  |  |  | 317 - 326 | 609.8  | 52.9  | K.CEEIKATVIR.H           | Carbamidomethyl: 1                    |
|  |  |  | 437 - 448 | 617.81 | 54.2  | G.VGAVNVCVSSSR.G         | Carbamidomethyl: 7                    |
|  |  |  | 334 - 343 | 623.34 | 77    | R.TKEEINELNR.V           |                                       |
|  |  |  | 334 - 343 | 623.8  | 53.4  | R.TKEEINELNR.V           | Deamidated: 6                         |
|  |  |  | 305 - 314 | 627.79 | 69.4  | R.SRAEAESWYR.S           |                                       |
|  |  |  | 285 - 295 | 630.34 | 67.8  | D.LNMDNIVAEIK.A          |                                       |
|  |  |  | 413 - 423 | 632.4  | 104.4 | K.LGLDIEIATYR.R          |                                       |
|  |  |  | 384 - 395 | 635.9  | 63.4  | K.LAGLEELQKAK.Q          |                                       |
|  |  |  | 285 - 295 | 638.35 | 35.6  | D.LNMDNIVAEIK.A          | Oxidation: 3                          |
|  |  |  | 436 - 448 | 646.29 | 59.3  | E.GVGAVNVCVSSSR.G        | Carbamidomethyl: 8                    |
|  |  |  | 218 - 229 | 660.86 | 84.3  | R.ATAENEFVALKK.D         |                                       |
|  |  |  | 260 - 264 | 675.25 | 25    | Y.EEEIR.V                |                                       |
|  |  |  | 284 - 295 | 687.91 | 87.4  | R.DLNMDNIVAEIK.A         |                                       |
|  |  |  | 284 - 295 | 695.89 | 64.6  | R.DLNMDNIVAEIK.A         | Oxidation: 4                          |
|  |  |  | 108 - 119 | 700.88 | 36.4  | L.NLEIDPNAQCVK.Q         | Carbamidomethyl: 10                   |
|  |  |  | 333 - 343 | 701.34 | 54.4  | R.RTKEEINELNR.V          |                                       |
|  |  |  | 435 - 448 | 710.81 | 48.8  | C.EGVGAVNVCVSSSR.G       | Carbamidomethyl: 9                    |
|  |  |  | 373 - 393 | 729.41 | 25.4  | Q.GEAALADAKCKLAGLEELQK.A | Carbamidomethyl: 10                   |
|  |  |  | 41 - 53   | 730.36 | 25    | G.VSCYRGLTGFGSR.S        | Carbamidomethyl: 3                    |
|  |  |  | 239 - 257 | 740.42 | 30.1  | K.SDLEANVEALIQETDFLR.L   |                                       |
|  |  |  | 142 - 153 | 745.89 | 59.5  | R.FLEQQNKLETKL           |                                       |
|  |  |  | 265 - 278 | 755.47 | 74.4  | R.VLQAHISDTSVIVK.M       |                                       |
|  |  |  | 384 - 397 | 757.42 | 53.6  | K.LAGLEELQKAKQD.M        |                                       |
|  |  |  | 478 - 491 | 761.84 | 62.2  | N.VVVGTSDFVCSPCSR.V      | Carbamidomethyl: 9, 12                |
|  |  |  | 149 - 160 | 776.94 | 66.3  | K.LLETKLQFYQNR.Q         |                                       |
|  |  |  | 238 - 257 | 783.08 | 42.9  | R.KSDLEANVEALIQETDFLR.L  |                                       |
|  |  |  | 142 - 160 | 814.79 | 33.6  | R.FLEQQNKLETKLQFYQNR.Q   | Deamidated: 4, 6                      |
|  |  |  | 160 - 179 | 825.07 | 35.4  | N.RQCCESNLEPLFSGYIETLR.R | Carbamidomethyl: 3, 4; Deamidated: 2  |
|  |  |  | 218 - 232 | 825.44 | 47.4  | R.ATAENEFVALKKD.VD.C     |                                       |
|  |  |  | 433 - 448 | 847.41 | 132.1 | R.LCEGVGAVNVCVSSSR.G     | Carbamidomethyl: 2, 11                |
|  |  |  | 433 - 448 | 847.92 | 33.8  | R.LCEGVGAVNVCVSSSR.G     | Carbamidomethyl: 2, 11; Deamidated: 9 |
|  |  |  | 165 - 179 | 869.98 | 56.4  | E.SNLEPLFSGYIETLR.R      |                                       |

|                           |              |      |       |           |         |       |                                 |                                                  |
|---------------------------|--------------|------|-------|-----------|---------|-------|---------------------------------|--------------------------------------------------|
|                           |              |      |       | 192 - 207 | 904.98  | 119.8 | R.LSSELNSLQEVLE<br>GYK.K        |                                                  |
|                           |              |      |       | 192 - 207 | 905.46  | 84.4  | R.LSSELNSLQEVLE<br>GYK.K        | Deamidated: 6                                    |
|                           |              |      |       | 192 - 207 | 905.97  | 33.2  | R.LSSELNSLQEVLE<br>GYK.K        | Deamidated: 6, 9                                 |
|                           |              |      |       | 362 - 379 | 907.93  | 96.5  | K.LEAAVTQAEQQG<br>EAALAD.A      |                                                  |
|                           |              |      |       | 241 - 256 | 931     | 120.1 | D.LEANVEALIQETD<br>FLR.R        |                                                  |
|                           |              |      |       | 192 - 208 | 969.01  | 72.3  | R.LSSELNSLQEVLE<br>GYKK.R       |                                                  |
|                           |              |      |       | 362 - 381 | 1007.49 | 152.8 | K.LEAAVTQAEQQG<br>EAALADAK.C    |                                                  |
|                           |              |      |       | 362 - 381 | 1008    | 66.9  | K.LEAAVTQAEQQG<br>EAALADAK.C    | Deamidated: 7                                    |
|                           |              |      |       | 102 - 119 | 1013.02 | 82.3  | E.SLLTPLNLEIDPNA<br>QCVK.Q      | Carbamidomethyl:<br>16                           |
|                           |              |      |       | 239 - 256 | 1032.01 | 114.9 | K.SDLEANVEALIQE<br>TDFLR.R      |                                                  |
|                           |              |      |       | 239 - 256 | 1032.55 | 73.3  | K.SDLEANVEALIQE<br>TDFLR.R      | Deamidated: 12                                   |
|                           |              |      |       | 239 - 256 | 1032.58 | 69.8  | K.SDLEANVEALIQE<br>TDFLR.R      | Deamidated: 6                                    |
|                           |              |      |       | 238 - 256 | 1096.05 | 175.6 | R.KSDLEANVEALIQ<br>ETDFLR.R     |                                                  |
|                           |              |      |       | 161 - 179 | 1158.51 | 102.2 | R.QCCESNLEPLFSG<br>YIETLR.R     | Carbamidomethyl:<br>2, 3                         |
| KAP10-<br>like<br>Partial | gj 999000052 | 46.4 | 391.5 | 277 - 286 | 604.8   | 57.2  | R.SISCEPLSCR.P                  | Carbamidomethyl:<br>4, 9                         |
|                           |              |      |       | 340 - 349 | 614.37  | 42.5  | R.QPYLTSISYR.P                  |                                                  |
|                           |              |      |       | 206 - 216 | 666.4   | 36.2  | R.VSLVCEPICVR.P                 | Carbamidomethyl:<br>5, 9                         |
|                           |              |      |       | 133 - 146 | 847.91  | 55.9  | R.VFCVPSSCQPILC<br>K.P          | Carbamidomethyl:<br>3, 8, 13                     |
|                           |              |      |       | 27 - 46   | 1115.99 | 108.8 | E.ATICEPSCSVSSC<br>AQPVSYK.A    | Carbamidomethyl:<br>4, 8, 13                     |
| KAP11.<br>1               | gj 999000018 | 16.7 | 950.8 | 145 - 155 | 688.28  | 77.4  | R.TYQQSCVSSCR.R                 | Carbamidomethyl:<br>6, 10                        |
|                           |              |      |       | 145 - 155 | 688.74  | 81.9  | R.TYQQSCVSSCR.R                 | Carbamidomethyl:<br>6, 10; Deamidated:<br>3      |
|                           |              |      |       | 145 - 155 | 688.76  | 79    | R.TYQQSCVSSCR.R                 | Carbamidomethyl:<br>6, 10; Deamidated:<br>4      |
|                           |              |      |       | 145 - 155 | 689.25  | 73.5  | R.TYQQSCVSSCR.R                 | Carbamidomethyl:<br>6, 10; Deamidated:<br>3, 4   |
|                           |              |      |       | 67 - 78   | 695.86  | 44.2  | C.YQPTPCVSSPVR.<br>V            | Carbamidomethyl: 6                               |
|                           |              |      |       | 98 - 120  | 830.79  | 68.4  | R.PLTFISSGCQPLS<br>GVSTVCKPVR.S | Carbamidomethyl:<br>9, 19                        |
|                           |              |      |       | 121 - 144 | 850.74  | 104.4 | R.SISTVCQVGGVS<br>TICQPTCGVSR.T | Carbamidomethyl:<br>6, 16, 20                    |
|                           |              |      |       | 121 - 144 | 851.08  | 43.6  | R.SISTVCQVGGVS<br>TICQPTCGVSR.T | Carbamidomethyl:<br>6, 16, 20;<br>Deamidated: 17 |
|                           |              |      |       | 83 - 97   | 866.33  | 76.6  | R.QTTCVSSPCSTTC<br>SR.P         | Carbamidomethyl:<br>4, 9, 13                     |
|                           |              |      |       | 83 - 97   | 866.79  | 66    | R.QTTCVSSPCSTTC<br>SR.P         | Carbamidomethyl:<br>4, 9, 13;<br>Deamidated: 1   |
|                           |              |      |       | 64 - 78   | 869.88  | 68.2  | Q.STCYQPTPCVSS<br>PVR.V         | Carbamidomethyl:<br>3, 9                         |

|             |              |      |       |           |         |       |                                       |                                                 |
|-------------|--------------|------|-------|-----------|---------|-------|---------------------------------------|-------------------------------------------------|
|             |              |      |       | 13 - 29   | 888.43  | 63    | R.RIGGEYTPVVTV<br>SSPD.A              |                                                 |
|             |              |      |       | 13 - 31   | 981.48  | 83.7  | R.RIGGEYTPVVTV<br>SSPDAD.C            |                                                 |
| KAP13.<br>1 | gij999000030 | 17.4 | 732.9 | 141 - 147 | 421.23  | 41    | R.PTFSSR.S                            |                                                 |
|             |              |      |       | 136 - 142 | 429.25  | 42.4  | R.SSFYRPT.F                           |                                                 |
|             |              |      |       | 136 - 143 | 502.81  | 41.7  | R.SSFYRPTF.F                          |                                                 |
|             |              |      |       | 136 - 144 | 576.35  | 49.5  | R.SSFYRPTFF.S                         |                                                 |
|             |              |      |       | 26 - 36   | 613.85  | 60.6  | C.GSSFPSNLVYR.T                       |                                                 |
|             |              |      |       | 125 - 135 | 634.84  | 36.7  | H.SPNIFSSLSCR.S                       | Carbamidomethyl:<br>10; Deamidated: 3           |
|             |              |      |       | 63 - 79   | 676.34  | 44.9  | R.TQTVVSSPCQTS<br>CYRPR.T             | Carbamidomethyl:<br>9, 13                       |
|             |              |      |       | 63 - 79   | 676.66  | 41.8  | R.TQTVVSSPCQTS<br>CYRPR.T             | Carbamidomethyl:<br>9, 13; Deamidated:<br>10    |
|             |              |      |       | 63 - 79   | 676.98  | 27.5  | R.TQTVVSSPCQTS<br>CYRPR.T             | Carbamidomethyl:<br>9, 13; Deamidated:<br>2, 10 |
|             |              |      |       | 148 - 163 | 861.91  | 76.7  | R.SGQSLSFQPTCG<br>SGFY.-              | Carbamidomethyl:<br>11                          |
|             |              |      |       | 148 - 163 | 862.41  | 83.6  | R.SGQSLSFQPTCG<br>SGFY.-              | Carbamidomethyl:<br>11; Deamidated: 3           |
|             |              |      |       | 20 - 36   | 934.44  | 111.6 | R.YSGSSCGSSFPS<br>NLVYR.T             | Carbamidomethyl: 6                              |
| KAP15.<br>1 | gij999000032 | 14.6 | 217   | 68 - 82   | 958.44  | 98    | R.FFQTSCSHPQNF<br>FR.S                | Carbamidomethyl: 6                              |
|             |              |      |       | 68 - 82   | 958.95  | 80.7  | R.FFQTSCSHPQNF<br>FR.S                | Carbamidomethyl:<br>6; Deamidated: 3            |
|             |              |      |       | 68 - 82   | 959.41  | 38.2  | R.FFQTSCSHPQNF<br>FR.S                | Carbamidomethyl:<br>6; Deamidated: 3,<br>10     |
| KAP16.<br>2 | gij999000035 | 6    | 239.9 | 7 - 19    | 690.41  | 49.4  | N.YYGGLGYGLGGF<br>R.G                 |                                                 |
|             |              |      |       | 1 - 19    | 1063.96 | 119.7 | -<br>.SYYGNYYGGLGY<br>GLGGFR.G        |                                                 |
|             |              |      |       | 1 - 19    | 1064.49 | 45.9  | -<br>.SYYGNYYGGLGY<br>GLGGFR.G        | Deamidated: 6                                   |
| KAP19.<br>3 | gij999000016 | 7.6  | 673.8 | 59 - 65   | 405.71  | 40.3  | R.CPSSFGR.Y                           | Carbamidomethyl: 1                              |
|             |              |      |       | 25 - 32   | 450.68  | 33.3  | R.GCGGSFR.R                           | Carbamidomethyl:<br>2, 4                        |
|             |              |      |       | 33 - 44   | 609.8   | 42.8  | R.RLGFSTGFGGYG.<br>C                  |                                                 |
|             |              |      |       | 9 - 24    | 767.9   | 84.4  | S.GLGYGYGGFGL<br>GFGR.G               |                                                 |
|             |              |      |       | 17 - 24   | 810.4   | 39    | G.FGGLGFGR.G                          |                                                 |
|             |              |      |       | 8 - 24    | 811.41  | 71.9  | Y.SGLGYGYGGFGL<br>LGFR.G              |                                                 |
|             |              |      |       | 34 - 58   | 858.05  | 91.3  | R.LGFSTGFGGYG<br>GSGFGSFGYGNR.<br>C   | Carbamidomethyl:<br>12                          |
|             |              |      |       | 1 - 24    | 870.39  | 96.9  | -<br>.CHYSNYYGGLGYG<br>YGGFGLGFGR.G   | Carbamidomethyl: 1                              |
|             |              |      |       | 1 - 25    | 889.37  | 43.4  | -<br>.CHYSNYYGGLGYG<br>YGGFGLGFGR.G.C | Carbamidomethyl: 1                              |
|             |              |      |       | 33 - 58   | 910.06  | 34.6  | R.RLGFSTGFGGYG<br>CGSFGSFGYGN<br>R.C  | Carbamidomethyl:<br>13                          |

|                |              |      |       |           |        |      |                                    |                                      |
|----------------|--------------|------|-------|-----------|--------|------|------------------------------------|--------------------------------------|
|                |              |      |       | 6 - 24    | 974.44 | 95.8 | N.YYSGLGYGYGGF<br>GGLGFGR.G        |                                      |
| KAP19.5        | gij999000015 | 7.7  | 292   | 34 - 41   | 427.21 | 56   | R.LGCGSGFR.G                       | Carbamidomethyl: 3                   |
|                |              |      |       | 25 - 32   | 450.68 | 33.3 | R.GCGCGSFR.R                       | Carbamidomethyl: 2, 4                |
|                |              |      |       | 65 - 72   | 512.24 | 34   | R.RCGFSSFY.-                       | Carbamidomethyl: 2                   |
|                |              |      |       | 9 - 24    | 767.9  | 84.4 | R.GLGYGYGGFGL<br>GFGR.G            |                                      |
|                |              |      |       | 17 - 24   | 810.4  | 39   | G.FGGLGFGR.G                       |                                      |
| KAP2.3<br>var2 | gij999000041 | 14   | 665.5 | 59 - 64   | 403.68 | 39.6 | R.RPVCCD.P                         | Carbamidomethyl: 4, 5                |
|                |              |      |       | 42 - 48   | 408.26 | 51.1 | R.PVTFVPR.C                        |                                      |
|                |              |      |       | 52 - 58   | 466.24 | 38.6 | R.PICEPCR.R                        | Carbamidomethyl: 3, 6                |
|                |              |      |       | 124 - 131 | 514.76 | 34   | R.TFRTSPCC.-                       | Carbamidomethyl: 7, 8                |
|                |              |      |       | 59 - 66   | 532.25 | 51   | R.RPVCCDPC.S                       | Carbamidomethyl: 4, 5, 8             |
|                |              |      |       | 110 - 119 | 587.22 | 55.8 | R.PTSCQPAPCR.T                     | Carbamidomethyl: 4, 9                |
|                |              |      |       | 32 - 48   | 620.02 | 54.3 | R.PVSSQTTVSRPVT<br>FVPR.C          |                                      |
|                |              |      |       | 59 - 68   | 632.28 | 50.3 | R.RPVCCDPCSL.Q                     | Carbamidomethyl: 4, 5, 8             |
|                |              |      |       | 15 - 25   | 664.27 | 33.2 | C.GGGCLQPCCYR.<br>D                | Carbamidomethyl: 4, 8, 9             |
|                |              |      |       | 49 - 58   | 674.77 | 32.7 | R.CTRPICEPCR.R                     | Carbamidomethyl: 1, 6, 9             |
|                |              |      |       | 59 - 74   | 685.26 | 65.6 | R.RPVCCDPCSLQE<br>GCCR.P           | Carbamidomethyl: 4, 5, 8, 14, 15     |
|                |              |      |       | 59 - 69   | 696.28 | 37.6 | R.RPVCCDPCSLQ.E                    | Carbamidomethyl: 4, 5, 8             |
|                |              |      |       | 59 - 71   | 789.3  | 34   | R.RPVCCDPCSLQE<br>G.C              | Carbamidomethyl: 4, 5, 8             |
|                |              |      |       | 59 - 78   | 842.32 | 52.5 | R.RPVCCDPCSLQE<br>GCCRPITC.C       | Carbamidomethyl: 4, 5, 8, 14, 15, 20 |
| KAP2.3<br>var3 | gij999000042 | 14.1 | 809   | 42 - 48   | 403.25 | 52.4 | R.PVTFVSR.C                        |                                      |
|                |              |      |       | 59 - 64   | 403.68 | 39.6 | R.RPVCCD.P                         | Carbamidomethyl: 4, 5                |
|                |              |      |       | 52 - 58   | 466.24 | 38.6 | R.PICEPCR.R                        | Carbamidomethyl: 3, 6                |
|                |              |      |       | 124 - 131 | 514.76 | 34   | R.TFRTSPCC.-                       | Carbamidomethyl: 7, 8                |
|                |              |      |       | 59 - 66   | 532.25 | 51   | R.RPVCCDPC.S                       | Carbamidomethyl: 4, 5, 8             |
|                |              |      |       | 110 - 119 | 587.22 | 55.8 | R.PTSCQPAPCR.T                     | Carbamidomethyl: 4, 9                |
|                |              |      |       | 59 - 68   | 632.28 | 50.3 | R.RPVCCDPCSL.Q                     | Carbamidomethyl: 4, 5, 8             |
|                |              |      |       | 49 - 58   | 674.77 | 32.7 | R.CTRPICEPCR.R                     | Carbamidomethyl: 1, 6, 9             |
|                |              |      |       | 59 - 74   | 685.26 | 65.6 | R.RPVCCDPCSLQE<br>GCCR.P           | Carbamidomethyl: 4, 5, 8, 14, 15     |
|                |              |      |       | 10 - 22   | 689.8  | 36.9 | F.SSLSCGGGCLQP<br>R.Y              | Carbamidomethyl: 5, 9                |
|                |              |      |       | 59 - 69   | 696.28 | 37.6 | R.RPVCCDPCSLQ.E                    | Carbamidomethyl: 4, 5, 8             |
|                |              |      |       | 9 - 22    | 763.34 | 39.8 | T.FSSLSCGGGCLQ<br>PR.Y             | Carbamidomethyl: 6, 10               |
|                |              |      |       | 1 - 22    | 782.68 | 58   | -<br>.TGSCCGPTFSSLSC<br>GGGCLQPR.Y | Carbamidomethyl: 4, 5, 14, 18        |

|               |              |      |       |           |         |       |                              |                                                                |
|---------------|--------------|------|-------|-----------|---------|-------|------------------------------|----------------------------------------------------------------|
|               |              |      |       | 59 - 71   | 789.3   | 34    | R.RPVCCDPCSLQE<br>G.C        | Carbamidomethyl:<br>4, 5, 8                                    |
|               |              |      |       | 59 - 78   | 842.32  | 52.5  | R.RPVCCDPCSLQE<br>GCCRPITC.C | Carbamidomethyl:<br>4, 5, 8, 14, 15, 20                        |
|               |              |      |       | 5 - 22    | 970.93  | 94    | C.CGPTFSSLSCGG<br>GCLQPR.Y   | Carbamidomethyl:<br>1, 10, 14                                  |
| KAP26.<br>1   | gij999000054 | 19.2 | 154   | 7 - 16    | 534.31  | 52.7  | C.SGNYTLGSLR.S               |                                                                |
|               |              |      |       | 39 - 49   | 646.79  | 55.5  | D.GLCLPSSCQDR.T              | Carbamidomethyl:<br>3, 8                                       |
|               |              |      |       | 169 - 183 | 845.95  | 45.8  | Y.VFSPYRPSYSTCG<br>GL.-      | Carbamidomethyl:<br>12                                         |
| KAP4-<br>like | gij999000058 | 17.5 | 352   | 156 - 164 | 563.71  | 61.9  | R.PVCCPSSCC.-                | Carbamidomethyl:<br>3, 4, 8, 9                                 |
|               |              |      |       | 17 - 25   | 607.25  | 49.8  | R.SLCQETCCR.P                | Carbamidomethyl:<br>3, 7, 8                                    |
|               |              |      |       | 17 - 27   | 699.25  | 47.5  | R.SLCQETCCRPS.C              | Carbamidomethyl:<br>3, 7, 8                                    |
|               |              |      |       | 36 - 48   | 767.8   | 56.1  | R.TTCYRPSCGVSS<br>C.C        | Carbamidomethyl:<br>3, 8, 13                                   |
|               |              |      |       | 17 - 35   | 842.27  | 32.7  | R.SLCQETCCRPS<br>CQTCCR.T    | Carbamidomethyl:<br>3, 7, 8, 12, 13, 17,<br>18; Deamidated: 14 |
|               |              |      |       | 97 - 109  | 854.81  | 103.9 | Q.CCQPVCCQPSCP<br>R.I        | Carbamidomethyl:<br>1, 2, 6, 7, 11                             |
| KAP6.1        | gij999000021 | 8.3  | 723.1 | 39 - 49   | 598.69  | 45    | C.GYGCGYGYGSR.<br>S          | Carbamidomethyl: 4                                             |
|               |              |      |       | 24 - 34   | 605.78  | 80.8  | C.GYGSCYGSFR.<br>R           | Carbamidomethyl: 5                                             |
|               |              |      |       | 50 - 61   | 632.27  | 83.6  | R.SLCGSGYGYGSR.<br>S         | Carbamidomethyl: 3                                             |
|               |              |      |       | 38 - 49   | 678.76  | 84.8  | G.CYGCGYGYGSR<br>.S          | Carbamidomethyl:<br>1, 5                                       |
|               |              |      |       | 43 - 49   | 759.26  | 26.5  | C.GYGYSR.S                   |                                                                |
|               |              |      |       | 36 - 49   | 763.82  | 94.1  | R.LGCGYGCYGYG<br>SR.S        | Carbamidomethyl:<br>3, 7                                       |
|               |              |      |       | 21 - 34   | 770.82  | 85    | G.LGCGYGCYGS<br>FR.R         | Carbamidomethyl:<br>3, 8                                       |
|               |              |      |       | 20 - 34   | 799.33  | 102.6 | G.GLGCYGCYGS<br>GFR.R        | Carbamidomethyl:<br>4, 9                                       |
|               |              |      |       | 35 - 49   | 841.84  | 62.8  | R.RLGCYGCYGY<br>GSR.S        | Carbamidomethyl:<br>4, 8                                       |
| KAP6.3        | gij999000020 | 8.3  | 844.8 | 39 - 49   | 598.69  | 45    | C.GYGCGYGYGSR.<br>S          | Carbamidomethyl: 4                                             |
|               |              |      |       | 24 - 34   | 605.78  | 80.8  | C.GYGSCYGSFR.<br>R           | Carbamidomethyl: 5                                             |
|               |              |      |       | 50 - 61   | 630.77  | 72.6  | R.SLCGSGYGCGR.<br>P          | Carbamidomethyl:<br>3, 9                                       |
|               |              |      |       | 38 - 49   | 678.76  | 84.8  | G.CYGCGYGYGSR<br>.S          | Carbamidomethyl:<br>1, 5                                       |
|               |              |      |       | 43 - 49   | 759.26  | 26.5  | C.GYGYSR.S                   |                                                                |
|               |              |      |       | 36 - 49   | 763.82  | 94.1  | R.LGCGYGCYGYG<br>SR.S        | Carbamidomethyl:<br>3, 7                                       |
|               |              |      |       | 21 - 34   | 770.82  | 85    | G.LGCGYGCYGS<br>FR.R         | Carbamidomethyl:<br>3, 8                                       |
|               |              |      |       | 20 - 34   | 799.33  | 102.6 | G.GLGCYGCYGS<br>GFR.R        | Carbamidomethyl:<br>4, 9                                       |
|               |              |      |       | 35 - 49   | 841.84  | 62.8  | R.RLGCYGCYGY<br>GSR.S        | Carbamidomethyl:<br>4, 8                                       |
|               |              |      |       | 50 - 65   | 845.89  | 56.2  | R.SLCGSGYGCGR<br>PLYG.C      | Carbamidomethyl:<br>3, 9                                       |
|               |              |      |       | 62 - 82   | 1152.94 | 92    | R.PLYGCYGCYGS<br>YGSFGYYY.-  | Carbamidomethyl:<br>5, 9                                       |
| KAP9.2        | gij999000072 | 30.4 | 979   | 229 - 235 | 451.68  | 28    | C.APVYCHR.T                  | Carbamidomethyl: 5                                             |

|                 |              |      |       |           |        |      |                            |                                                  |
|-----------------|--------------|------|-------|-----------|--------|------|----------------------------|--------------------------------------------------|
|                 |              |      |       | 236 - 242 | 469.7  | 32.7 | R.TCYHPTC.C                | Carbamidomethyl:<br>2, 7                         |
|                 |              |      |       | 236 - 243 | 549.74 | 50.3 | R.TCYHPTCC.C               | Carbamidomethyl:<br>2, 7, 8                      |
|                 |              |      |       | 222 - 235 | 589.24 | 31   | N.CCQPASCAPVYC<br>HR.T     | Carbamidomethyl:<br>1, 2, 7, 12                  |
|                 |              |      |       | 24 - 37   | 599.56 | 39.4 | C.PPTCYQTSEHTC<br>CR.T     | Carbamidomethyl:<br>4, 12, 13                    |
|                 |              |      |       | 155 - 165 | 626.31 | 62.1 | R.TTCLKPVCAATT.C           | Carbamidomethyl:<br>3, 8                         |
|                 |              |      |       | 38 - 48   | 628.28 | 32.6 | R.TTCSKPTCVTT.C            | Carbamidomethyl:<br>3, 8                         |
|                 |              |      |       | 76 - 86   | 641.32 | 33.4 | R.TTCLKPTCVTT.C            | Carbamidomethyl:<br>3, 8                         |
|                 |              |      |       | 66 - 75   | 641.75 | 76.1 | R.PISCQTTCCR.T             | Carbamidomethyl:<br>4, 8, 9                      |
|                 |              |      |       | 264 - 273 | 671.19 | 68   | R.PVCCQTTCCR.T             | Carbamidomethyl:<br>3, 4, 8, 9                   |
|                 |              |      |       | 264 - 273 | 671.75 | 58.7 | R.PVCCQTTCCR.T             | Carbamidomethyl:<br>3, 4, 8, 9;<br>Deamidated: 5 |
|                 |              |      |       | 218 - 235 | 694.27 | 35.3 | C.GGSNCCQPASCA<br>PVYCHR.T | Carbamidomethyl:<br>5, 6, 11, 16                 |
|                 |              |      |       | 38 - 49   | 708.26 | 47.4 | R.TTCSKPTCVTTC.<br>C       | Carbamidomethyl:<br>3, 8, 12                     |
|                 |              |      |       | 76 - 87   | 721.32 | 64.3 | R.TTCLKPTCVTTC.C           | Carbamidomethyl:<br>3, 8, 12                     |
|                 |              |      |       | 21 - 37   | 738.61 | 40.9 | R.PCCPPTCYQTSE<br>HTCCR.T  | Carbamidomethyl:<br>2, 3, 7, 15, 16              |
|                 |              |      |       | 263 - 273 | 749.26 | 42   | S.RPVCCQTTCCR.T            | Carbamidomethyl:<br>4, 5, 9, 10                  |
|                 |              |      |       | 236 - 247 | 763.27 | 30.8 | R.TCYHPTCCCLPG.<br>C       | Carbamidomethyl:<br>2, 7, 8, 9                   |
|                 |              |      |       | 236 - 248 | 843.3  | 36   | R.TCYHPTCCCLPG<br>C.Q      | Carbamidomethyl:<br>2, 7, 8, 9, 13               |
|                 |              |      |       | 38 - 53   | 936.36 | 49.8 | R.TTCSKPTCVTTCC<br>QPA.C   | Carbamidomethyl:<br>3, 8, 12, 13                 |
|                 |              |      |       | 277 - 291 | 952.81 | 63.2 | R.CRPSCVSSCCQP<br>SCC.-    | Carbamidomethyl:<br>1, 5, 9, 10, 14, 15          |
| KAP9.2<br>-like | gij999000057 | 20.6 | 745.1 | 140 - 145 | 395.7  | 28.5 | R.ICYHPT.C                 | Carbamidomethyl: 2                               |
|                 |              |      |       | 133 - 139 | 451.68 | 28   | C.APVYCHR.I                | Carbamidomethyl: 5                               |
|                 |              |      |       | 140 - 146 | 475.72 | 40.2 | R.ICYHPTC.C                | Carbamidomethyl:<br>2, 7                         |
|                 |              |      |       | 9 - 15    | 489.16 | 25.4 | R.CQPPCCR.T                | Carbamidomethyl:<br>1, 5, 6                      |
|                 |              |      |       | 140 - 147 | 555.75 | 59.4 | R.ICYHPTCC.C               | Carbamidomethyl:<br>2, 7, 8                      |
|                 |              |      |       | 126 - 139 | 589.24 | 31   | P.CCQPASCAPVYC<br>HR.I     | Carbamidomethyl:<br>1, 2, 7, 12                  |
|                 |              |      |       | 81 - 90   | 653.25 | 46.1 | C.YQTSETTCCR.T             | Carbamidomethyl:<br>8, 9                         |
|                 |              |      |       | 168 - 177 | 671.19 | 68   | R.PVCCQTTCCR.T             | Carbamidomethyl:<br>3, 4, 8, 9                   |
|                 |              |      |       | 168 - 177 | 671.75 | 58.7 | R.PVCCQTTCCR.T             | Carbamidomethyl:<br>3, 4, 8, 9;<br>Deamidated: 5 |
|                 |              |      |       | 167 - 177 | 749.26 | 42   | N.RPVCCQTTCCR.T            | Carbamidomethyl:<br>4, 5, 9, 10                  |
|                 |              |      |       | 140 - 151 | 769.31 | 26.8 | R.ICYHPTCCCLPG.<br>C       | Carbamidomethyl:<br>2, 7, 8, 9                   |
|                 |              |      |       | 140 - 152 | 849.33 | 39.8 | R.ICYHPTCCCLPGC<br>.Q      | Carbamidomethyl:<br>2, 7, 8, 9, 13               |
|                 |              |      |       | 77 - 90   | 880.83 | 94.9 | C.PPTCYQTSETTCC<br>R.T     | Carbamidomethyl:<br>4, 12, 13                    |

|     |              |      |        |           |         |       |                                          |                                         |
|-----|--------------|------|--------|-----------|---------|-------|------------------------------------------|-----------------------------------------|
|     |              |      |        | 16 - 30   | 930.3   | 86.7  | R.TTCESSGCQPC<br>CPR.T                   | Carbamidomethyl:<br>3, 4, 9, 12, 13     |
|     |              |      |        | 178 - 194 | 1070.39 | 52.4  | R.TTCCRPSCVSTC<br>CPSFC.-                | Carbamidomethyl:<br>3, 4, 8, 12, 13, 17 |
| K10 | gij999000082 | 56.3 | 599.3  | 211 - 217 | 404.21  | 58.2  | R.LAADDFR.M                              |                                         |
|     |              |      |        | 139 - 145 | 405.24  | 58.6  | R.LASYLDK.V                              |                                         |
|     |              |      |        | 240 - 248 | 516.34  | 70.2  | R.VLDELTLTK.T                            |                                         |
|     |              |      |        | 317 - 325 | 555.29  | 59.8  | R.DAEAWFNEK.S                            |                                         |
|     |              |      |        | 369 - 381 | 695.85  | 99.7  | K.QSLEASLAETEGR<br>.Y                    |                                         |
|     |              |      |        | 369 - 381 | 696.38  | 50.9  | K.QSLEASLAETEGR<br>.Y                    | Deamidated: 1                           |
|     |              |      |        | 422 - 432 | 717.88  | 64.4  | K.IRLENIQTYR.S                           |                                         |
|     |              |      |        | 32 - 50   | 854.4   | 100.6 | K.GSLGGGFSSGGF<br>SGGSFSR.G              |                                         |
| K31 | gij164652864 | 46.8 | 4415.1 | 224 - 229 | 366.2   | 47.5  | R.VLNETR.A                               |                                         |
|     |              |      |        | 136 - 142 | 404.21  | 58.2  | K.LAADDFR.T                              |                                         |
|     |              |      |        | 217 - 223 | 407.76  | 34.1  | A.PTVDLNR.V                              |                                         |
|     |              |      |        | 323 - 329 | 408.78  | 47.1  | E.SQLAEIR.G                              |                                         |
|     |              |      |        | 67 - 73   | 412.26  | 54    | R.LASYLEK.V                              |                                         |
|     |              |      |        | 7 - 13    | 423.78  | 40.5  | C.LPNLSFR.S                              |                                         |
|     |              |      |        | 103 - 108 | 432.21  | 35.7  | N.YQSYFR.T                               |                                         |
|     |              |      |        | 153 - 164 | 467.26  | 25.4  | R.QLVESDINGLRR.I                         |                                         |
|     |              |      |        | 80 - 87   | 474.25  | 45    | R.ENAELESR.I                             |                                         |
|     |              |      |        | 230 - 241 | 483.93  | 60.5  | R.AQYEALVETNRR.<br>D                     |                                         |
|     |              |      |        | 66 - 73   | 490.3   | 48.4  | D.RLASYLEK.V                             |                                         |
|     |              |      |        | 145 - 152 | 490.8   | 57.4  | K.YETELGLR.Q                             |                                         |
|     |              |      |        | 109 - 116 | 494.8   | 59.2  | R.TIEELQQK.I                             |                                         |
|     |              |      |        | 243 - 249 | 497.74  | 53.7  | D.VEEWYIR.Q                              |                                         |
|     |              |      |        | 127 - 135 | 500.33  | 65.5  | R.LVVQIDNAK.L                            |                                         |
|     |              |      |        | 127 - 135 | 500.84  | 72.8  | R.LVVQIDNAK.L                            | Deamidated: 7                           |
|     |              |      |        | 6 - 13    | 503.83  | 37    | F.CLPNLSFR.S                             | Carbamidomethyl: 1                      |
|     |              |      |        | 176 - 184 | 508.8   | 49.9  | D.LEAQVESLK.E                            |                                         |
|     |              |      |        | 358 - 366 | 518.78  | 37.5  | R.GLLDSEDCK.L                            | Carbamidomethyl: 8                      |
|     |              |      |        | 214 - 223 | 536.28  | 49.7  | V.DAAPTVDLNR.V                           |                                         |
|     |              |      |        | 101 - 108 | 537.77  | 51.4  | C.PNYQSYFR.T                             |                                         |
|     |              |      |        | 67 - 75   | 539.84  | 72.4  | R.LASYLEKVR.Q                            |                                         |
|     |              |      |        | 165 - 173 | 552.87  | 78    | R.ILDELTLCK.S                            | Carbamidomethyl: 8                      |
|     |              |      |        | 242 - 249 | 555.28  | 54.7  | R.DVEEWYIR.Q                             |                                         |
|     |              |      |        | 405 - 413 | 556.76  | 67.8  | R.CGPCNSYVR.-<br>D.AAPTVDLNRVLNE<br>TR.A | Carbamidomethyl:<br>1, 4                |
|     |              |      |        | 215 - 229 | 557.01  | 28.9  | F.RTIEELQQK.I                            |                                         |
|     |              |      |        | 108 - 116 | 572.83  | 35    | N.FCLPNLSFR.S                            | Carbamidomethyl: 2                      |
|     |              |      |        | 5 - 13    | 577.31  | 46.4  | K.ETMQFLNDR.L                            |                                         |
|     |              |      |        | 58 - 66   | 577.32  | 62.9  | K.ETMQFLNDR.L                            | Oxidation: 3                            |
|     |              |      |        | 58 - 66   | 585.29  | 55.9  | D.RLNVEVDAAPTVD<br>LNR.V                 |                                         |
|     |              |      |        | 208 - 223 | 594.69  | 35.8  | R.LVVQIDNAKLAAD<br>DFR.T                 |                                         |
|     |              |      |        | 127 - 142 | 596.68  | 52.8  | R.LECEINTYR.G                            | Carbamidomethyl: 3                      |
|     |              |      |        | 349 - 357 | 599.31  | 64    | R.TKYETELGLR.Q                           |                                         |
|     |              |      |        | 143 - 152 | 605.35  | 68    | K.SDLEAQVESLK.E                          |                                         |
|     |              |      |        | 174 - 184 | 609.83  | 82    | E.SLKEELICK.S                            | Carbamidomethyl: 8                      |
|     |              |      |        | 182 - 191 | 616.89  | 48    |                                          |                                         |

|  |  |  |  |           |         |       |                                   |                                       |
|--|--|--|--|-----------|---------|-------|-----------------------------------|---------------------------------------|
|  |  |  |  | 209 - 220 | 621.85  | 50.9  | R.LNVEVDAAPTVD.<br>L              |                                       |
|  |  |  |  | 335 - 344 | 625.33  | 35.2  | R.QNQEQVLLD.V                     |                                       |
|  |  |  |  | 164 - 173 | 630.9   | 43.1  | R.RILDELTLCK.S                    | Carbamidomethyl: 9                    |
|  |  |  |  | 241 - 249 | 633.32  | 51.7  | R.RDVEEWYIR.Q                     |                                       |
|  |  |  |  | 4 - 13    | 634.39  | 37    | F.NFCLPNLSFR.S                    | Carbamidomethyl: 3                    |
|  |  |  |  | 47 - 57   | 644.79  | 40.4  | W.FCEGSFNGNEK.E                   | Carbamidomethyl: 2                    |
|  |  |  |  | 230 - 240 | 647.33  | 94.8  | R.AQYEALVETNR.R                   |                                       |
|  |  |  |  | 92 - 102  | 650.34  | 50.2  | R.SQQQEPLVCPN.Y                   | Carbamidomethyl: 9                    |
|  |  |  |  | 277 - 293 | 664.41  | 75.2  | R.RTVNALEVELQAQ<br>HNLR.D         |                                       |
|  |  |  |  | 203 - 214 | 672.88  | 26.9  | R.SQLGDRLNVEVD.<br>A              |                                       |
|  |  |  |  | 295 - 306 | 682.37  | 87.7  | D.SLENTLTETEAR.Y                  |                                       |
|  |  |  |  | 347 - 357 | 712.86  | 60.1  | R.ARLECEINTYR.G                   | Carbamidomethyl: 5                    |
|  |  |  |  | 229 - 240 | 725.38  | 61.3  | T.RAQYEALVETNR.<br>R              |                                       |
|  |  |  |  | 230 - 241 | 725.87  | 27.6  | R.AQYEALVETNRR.<br>D              | Deamidated: 10                        |
|  |  |  |  | 180 - 191 | 730.94  | 75.6  | Q.VESLKEELICK.S                   | Carbamidomethyl:<br>10                |
|  |  |  |  | 174 - 192 | 731.07  | 30    | K.SDLEAQVESLKEE<br>LICKS.N        | Carbamidomethyl:<br>16                |
|  |  |  |  | 294 - 306 | 739.87  | 99.4  | R.DSLENTLTETEAR.<br>Y             |                                       |
|  |  |  |  | 294 - 306 | 740.35  | 93.3  | R.DSLENTLTETEAR.<br>Y             | Deamidated: 5                         |
|  |  |  |  | 2 - 13    | 751.88  | 35.4  | M.SFNCLPNLSFR.<br>S               | Carbamidomethyl:<br>5; Deamidated: 3  |
|  |  |  |  | 335 - 346 | 752.93  | 100.2 | R.QNQEQVLLDVR.<br>A               |                                       |
|  |  |  |  | 335 - 346 | 753.41  | 63.1  | R.QNQEQVLLDVR.<br>A               | Deamidated: 2                         |
|  |  |  |  | 281 - 293 | 760.89  | 80.4  | N.ALEVELQAQHNL<br>.D              |                                       |
|  |  |  |  | 203 - 223 | 761.41  | 32    | R.SQLGDRLNVEVD<br>AAPTVDLNR.V     |                                       |
|  |  |  |  | 109 - 121 | 787.49  | 70.4  | R.TIEELQKILCAK.<br>S              | Carbamidomethyl:<br>11                |
|  |  |  |  | 381 - 402 | 805.07  | 52.7  | K.TITPCISSPCAPAA<br>PCTPCVPR.S    | Carbamidomethyl:<br>5, 10, 16, 19     |
|  |  |  |  | 209 - 223 | 813.44  | 97    | R.LNVEVDAAPTVDL<br>NR.V           |                                       |
|  |  |  |  | 174 - 188 | 851.95  | 56.1  | K.SDLEAQVESLKEE<br>LI.C           |                                       |
|  |  |  |  | 307 - 329 | 893.77  | 55.9  | R.YSCQLNQVQSLIS<br>NVESQLAEIR.G   | Carbamidomethyl: 3                    |
|  |  |  |  | 278 - 293 | 918.01  | 119.5 | R.TVNALEVELQAQ<br>HLR.D           |                                       |
|  |  |  |  | 176 - 191 | 951.56  | 91.5  | D.LEAQVESLKEELI<br>LK.S           | Carbamidomethyl:<br>14                |
|  |  |  |  | 278 - 294 | 975.49  | 35    | R.TVNALEVELQAQ<br>HLRD.S          |                                       |
|  |  |  |  | 174 - 200 | 1048.54 | 26.8  | K.SDLEAQVESLKEE<br>LICKSNHEEVNT.L | Carbamidomethyl:<br>16                |
|  |  |  |  | 174 - 191 | 1052.61 | 101.7 | K.SDLEAQVESLKEE<br>LICK.S         | Carbamidomethyl:<br>16                |
|  |  |  |  | 174 - 191 | 1053.06 | 61.2  | K.SDLEAQVESLKEE<br>LICK.S         | Carbamidomethyl:<br>16; Deamidated: 6 |
|  |  |  |  | 92 - 108  | 1072.49 | 72.8  | R.SQQQEPLVCPNY<br>QSYFR.T         | Carbamidomethyl: 9                    |
|  |  |  |  | 310 - 329 | 1135.59 | 65.5  | C.QLNQVQSLISNVE<br>SQLAEIR.G      | Deamidated: 3                         |



|     |              |      |        |           |        |      |                           |                          |
|-----|--------------|------|--------|-----------|--------|------|---------------------------|--------------------------|
| K33 | gij312283592 | 46.1 | 3796.6 | 224 - 229 | 366.2  | 47.5 | H.VLNETR.A                |                          |
|     |              |      |        | 323 - 329 | 408.78 | 47.1 | E.SQLAEIR.S               |                          |
|     |              |      |        | 136 - 142 | 412.22 | 58.9 | K.LASDDFR.T               |                          |
|     |              |      |        | 67 - 73   | 412.26 | 54   | R.LASYLEK.V               |                          |
|     |              |      |        | 7 - 13    | 423.78 | 40.5 | C.LPNLSFR.S               |                          |
|     |              |      |        | 80 - 86   | 430.72 | 25.3 | R.ENAELER.R               |                          |
|     |              |      |        | 103 - 108 | 432.21 | 35.7 | N.YQSYFR.T                |                          |
|     |              |      |        | 230 - 241 | 483.93 | 60.5 | R.AQYEALVETNRR.<br>D      |                          |
|     |              |      |        | 66 - 73   | 490.3  | 48.4 | D.RLASYLEK.V              |                          |
|     |              |      |        | 109 - 116 | 494.8  | 59.2 | R.TIEELQQK.I              |                          |
|     |              |      |        | 243 - 249 | 497.74 | 53.7 | D.VEEWYIR.Q               |                          |
|     |              |      |        | 145 - 152 | 498.79 | 60.9 | K.YETEVSLR.Q              |                          |
|     |              |      |        | 127 - 135 | 500.33 | 65.5 | R.LVVQIDNAK.L             |                          |
|     |              |      |        | 127 - 135 | 500.84 | 72.8 | R.LVVQIDNAK.L             | Deamidated: 7            |
|     |              |      |        | 6 - 13    | 503.83 | 37   | F.CLPNLSFR.S              | Carbamidomethyl: 1       |
|     |              |      |        | 358 - 366 | 518.78 | 37.5 | R.GLLDSEDCK.L             | Carbamidomethyl: 8       |
|     |              |      |        | 101 - 108 | 537.77 | 51.4 | C.PNYQSYFR.T              |                          |
|     |              |      |        | 67 - 75   | 539.84 | 72.4 | R.LASYLEKVR.Q             |                          |
|     |              |      |        | 396 - 404 | 546.24 | 62   | R.CGPCNTFVH.-             | Carbamidomethyl:<br>1, 4 |
|     |              |      |        | 221 - 229 | 548.31 | 38.8 | D.LNHVLNETR.A             |                          |
|     |              |      |        | 165 - 173 | 552.87 | 78   | R.ILDELTCK.S              | Carbamidomethyl: 8       |
|     |              |      |        | 242 - 249 | 555.28 | 54.7 | R.DVEEWYIR.Q              |                          |
|     |              |      |        | 108 - 116 | 572.83 | 35   | F.RTIEELQQK.I             |                          |
|     |              |      |        | 5 - 13    | 577.31 | 46.4 | N.FCLPNLSFR.S             | Carbamidomethyl: 2       |
|     |              |      |        | 58 - 66   | 577.32 | 62.9 | K.ETMQFLNDR.L             |                          |
|     |              |      |        | 58 - 66   | 585.29 | 55.9 | K.ETMQFLNDR.L             | Oxidation: 3             |
|     |              |      |        | 349 - 357 | 599.31 | 64   | R.LECEINTYR.G             | Carbamidomethyl: 3       |
|     |              |      |        | 143 - 152 | 613.32 | 66.7 | R.TKYETEVSLR.Q            |                          |
|     |              |      |        | 153 - 163 | 614.39 | 71.2 | R.QLVEADLNGLR.R           |                          |
|     |              |      |        | 153 - 163 | 614.88 | 71.3 | R.QLVEADLNGLR.R           | Deamidated: 8            |
|     |              |      |        | 182 - 191 | 616.89 | 48   | E.SLKEELICK.Q             | Carbamidomethyl: 8       |
|     |              |      |        | 209 - 220 | 621.85 | 50.9 | R.LNVEVDAAPTVD.<br>L      |                          |
|     |              |      |        | 335 - 344 | 625.33 | 35.2 | R.QNQEQVLLD.V             |                          |
|     |              |      |        | 164 - 173 | 630.9  | 43.1 | R.RILDELTCK.S             | Carbamidomethyl: 9       |
|     |              |      |        | 241 - 249 | 633.32 | 51.7 | R.RDVEEWYIR.Q             |                          |
|     |              |      |        | 4 - 13    | 634.39 | 37   | F.NFCLPNLSFR.S            | Carbamidomethyl: 3       |
|     |              |      |        | 47 - 57   | 644.79 | 40.4 | W.FCEGSFNGNEK.E           | Carbamidomethyl: 2       |
|     |              |      |        | 230 - 240 | 647.33 | 94.8 | R.AQYEALVETNR.R           |                          |
|     |              |      |        | 92 - 102  | 650.34 | 50.2 | R.SQQQEPLVCPN.Y           | Carbamidomethyl: 9       |
|     |              |      |        | 277 - 293 | 664.41 | 75.2 | R.RTVNALEVELQAQ<br>HNLR.D |                          |
|     |              |      |        | 203 - 214 | 672.88 | 26.9 | R.SQLGDRLNVEVD.<br>A      |                          |
|     |              |      |        | 295 - 306 | 682.37 | 87.7 | D.SLENTLTETEAR.Y          |                          |
|     |              |      |        | 192 - 202 | 684.31 | 67.7 | K.QNHEQEVNTLR.S           |                          |
|     |              |      |        | 192 - 202 | 685.77 | 45.1 | K.QNHEQEVNTLR.S           | Deamidated: 1, 2, 5      |
|     |              |      |        | 152 - 163 | 692.43 | 27.6 | L.RQLVEADLNGLR.<br>R      |                          |
|     |              |      |        | 347 - 357 | 712.86 | 60.1 | R.ARLECEINTYR.G           | Carbamidomethyl: 5       |
|     |              |      |        | 229 - 240 | 725.38 | 61.3 | T.RAQYEALVETNR.<br>R      |                          |
|     |              |      |        | 230 - 241 | 725.87 | 27.6 | R.AQYEALVETNRR.           | Deamidated: 10           |

|     |              |      |        |           |         |       |                                 |                                      |
|-----|--------------|------|--------|-----------|---------|-------|---------------------------------|--------------------------------------|
|     |              |      |        |           |         |       | D                               |                                      |
|     |              |      |        | 381 - 393 | 728.88  | 34.6  | R.PIGPCISNPCVSR.<br>T           | Carbamidomethyl:<br>5, 10            |
|     |              |      |        | 180 - 191 | 730.94  | 75.6  | R.VESLKEELICK.Q                 | Carbamidomethyl:<br>10               |
|     |              |      |        | 294 - 306 | 739.87  | 99.4  | R.DSLENTLTETEAR.<br>Y           |                                      |
|     |              |      |        | 294 - 306 | 740.35  | 93.3  | R.DSLENTLTETEAR.<br>Y           | Deamidated: 5                        |
|     |              |      |        | 2 - 13    | 751.88  | 35.4  | M.SFNFCPLNLSFR.<br>S            | Carbamidomethyl:<br>5; Deamidated: 3 |
|     |              |      |        | 335 - 346 | 752.93  | 100.2 | R.QNQEQVLLDVR.<br>A             |                                      |
|     |              |      |        | 335 - 346 | 753.41  | 63.1  | R.QNQEQVLLDVR.<br>A             | Deamidated: 2                        |
|     |              |      |        | 281 - 293 | 760.89  | 80.4  | N.ALEVELQAQHNL<br>.D            |                                      |
|     |              |      |        | 209 - 229 | 773.75  | 65.9  | R.LNVEVDAAPTVDL<br>NHVLNETR.A   |                                      |
|     |              |      |        | 209 - 229 | 774.41  | 48.7  | R.LNVEVDAAPTVDL<br>NHVLNETR.A   | Deamidated: 2, 14                    |
|     |              |      |        | 215 - 229 | 825.46  | 95.9  | D.AAPTVDLNHVLNE<br>TR.A         |                                      |
|     |              |      |        | 307 - 329 | 888.81  | 58.8  | R.YSQQLNQVQSLIV<br>SVESQLAEIR.S | Carbamidomethyl: 3                   |
|     |              |      |        | 278 - 293 | 918.01  | 119.5 | R.TVNALEVELQAQH<br>NLR.D        |                                      |
|     |              |      |        | 278 - 294 | 975.49  | 35    | R.TVNALEVELQAQH<br>NLRD.S       |                                      |
|     |              |      |        | 92 - 108  | 1072.49 | 72.8  | R.SQQQEPLVCPNY<br>QSYFR.T       | Carbamidomethyl: 9                   |
| K34 | gij309323371 | 46.6 | 3780.2 | 240 - 245 | 366.2   | 47.5  | R.VLNETR.A                      |                                      |
|     |              |      |        | 233 - 239 | 407.76  | 34.1  | A.PTVDLNR.V                     |                                      |
|     |              |      |        | 339 - 345 | 408.78  | 47.1  | E.SQLAEIR.S                     |                                      |
|     |              |      |        | 152 - 158 | 412.22  | 58.9  | K.LASDDFR.T                     |                                      |
|     |              |      |        | 83 - 89   | 412.26  | 54    | R.LASYLEK.V                     |                                      |
|     |              |      |        | 119 - 124 | 432.21  | 35.7  | N.YQSYFR.T                      |                                      |
|     |              |      |        | 208 - 218 | 442.89  | 45.6  | K.KNHEEEANSLR.S                 |                                      |
|     |              |      |        | 96 - 103  | 474.25  | 45    | R.ENAELESR.I                    |                                      |
|     |              |      |        | 246 - 257 | 483.93  | 60.5  | R.AQYEALVETNRR.<br>D            |                                      |
|     |              |      |        | 82 - 89   | 490.3   | 48.4  | D.RLASYLEK.V                    |                                      |
|     |              |      |        | 125 - 132 | 494.8   | 59.2  | R.TIEELQQK.I                    |                                      |
|     |              |      |        | 259 - 265 | 497.74  | 53.7  | D.VEEWYIR.Q                     |                                      |
|     |              |      |        | 143 - 151 | 507.35  | 65.2  | R.LVIQIDNAK.L                   |                                      |
|     |              |      |        | 143 - 151 | 507.84  | 38.5  | R.LVIQIDNAK.L                   | Deamidated: 7                        |
|     |              |      |        | 192 - 200 | 508.8   | 49.9  | D.LEAQVESLK.E                   |                                      |
|     |              |      |        | 230 - 239 | 536.28  | 49.7  | V.DAAPTVDLNR.V                  |                                      |
|     |              |      |        | 117 - 124 | 537.77  | 51.4  | C.PNYQSYFR.T                    |                                      |
|     |              |      |        | 83 - 91   | 539.84  | 72.4  | R.LASYLEKVR.Q                   |                                      |
|     |              |      |        | 30 - 43   | 542.94  | 39.2  | R.SSCSSRPCVPSS<br>CR.G          | Carbamidomethyl:<br>3, 8, 13         |
|     |              |      |        | 181 - 189 | 552.87  | 78    | R.ILDELTCLK.S                   | Carbamidomethyl: 8                   |
|     |              |      |        | 258 - 265 | 555.28  | 54.7  | R.DVEEWYIR.Q                    |                                      |
|     |              |      |        | 231 - 245 | 557.01  | 28.9  | D.AAPTVDLNRVLNE<br>TR.A         |                                      |
|     |              |      |        | 365 - 373 | 562.78  | 65.1  | R.LESEINTYR.G                   |                                      |
|     |              |      |        | 124 - 132 | 572.83  | 35    | F.RTIEELQQK.I                   |                                      |
|     |              |      |        | 74 - 82   | 577.32  | 62.9  | K.ETMQFLNDR.L                   |                                      |

|     |              |      |       |           |         |       |                                    |                                               |
|-----|--------------|------|-------|-----------|---------|-------|------------------------------------|-----------------------------------------------|
|     |              |      |       | 74 - 82   | 585.29  | 55.9  | K.ETMQFLNDR.L                      | Oxidation: 3                                  |
|     |              |      |       | 365 - 374 | 591.31  | 51    | R.LESEINTYRG.L                     |                                               |
|     |              |      |       | 224 - 239 | 594.69  | 35.8  | D.RLNVEVDAAPTVD<br>LNR.V           |                                               |
|     |              |      |       | 209 - 218 | 599.79  | 48.2  | K.NHEEEANSLR.S                     |                                               |
|     |              |      |       | 190 - 200 | 609.83  | 82    | K.SDLEAQVESLK.E                    |                                               |
|     |              |      |       | 198 - 207 | 616.89  | 48    | E.SLKEELLCLK.K                     | Carbamidomethyl: 8                            |
|     |              |      |       | 225 - 236 | 621.85  | 50.9  | R.LNVEVDAAPTVD.<br>L               |                                               |
|     |              |      |       | 351 - 360 | 625.33  | 35.2  | R.QNQEYQVLLD.V                     |                                               |
|     |              |      |       | 180 - 189 | 630.9   | 43.1  | R.RILDELTLCK.S                     | Carbamidomethyl: 9                            |
|     |              |      |       | 257 - 265 | 633.32  | 51.7  | R.RDVEEWYIR.Q                      |                                               |
|     |              |      |       | 63 - 73   | 644.79  | 40.4  | W.FCEGSFNGNEK.E                    | Carbamidomethyl: 2                            |
|     |              |      |       | 246 - 256 | 647.33  | 94.8  | R.AQYEALVETNR.R                    |                                               |
|     |              |      |       | 293 - 309 | 664.41  | 75.2  | R.RTVNALEVELQAQ<br>HNLR.D          |                                               |
|     |              |      |       | 219 - 230 | 672.88  | 26.9  | R.SQLGDRLNVEVD.<br>A               |                                               |
|     |              |      |       | 363 - 373 | 676.37  | 77    | K.ARLESEINTYR.G                    |                                               |
|     |              |      |       | 311 - 322 | 682.37  | 87.7  | D.SLENTLTETEAR.Y                   |                                               |
|     |              |      |       | 245 - 256 | 725.38  | 61.3  | T.RAQYEALVETNR.<br>R               |                                               |
|     |              |      |       | 246 - 257 | 725.87  | 27.6  | R.AQYEALVETNRR.<br>D               | Deamidated: 10                                |
|     |              |      |       | 196 - 207 | 730.94  | 75.6  | Q.VESLKEELLCLK.K                   | Carbamidomethyl:<br>10                        |
|     |              |      |       | 351 - 362 | 738.9   | 25.8  | R.QNQEYQVLLDVK.<br>A               |                                               |
|     |              |      |       | 310 - 322 | 739.87  | 99.4  | R.DSLENTLTETEAR.<br>Y              |                                               |
|     |              |      |       | 310 - 322 | 740.35  | 93.3  | R.DSLENTLTETEAR.<br>Y              | Deamidated: 5                                 |
|     |              |      |       | 297 - 309 | 760.89  | 80.4  | N.ALEVELQAQHNL<br>.D               |                                               |
|     |              |      |       | 219 - 239 | 761.41  | 32    | R.SQLGDRLNVEVD<br>AAPTVDLNR.V      |                                               |
|     |              |      |       | 125 - 137 | 787.49  | 70.4  | R.TIEELQQKILCAK.<br>S              | Carbamidomethyl:<br>11                        |
|     |              |      |       | 225 - 239 | 813.44  | 97    | R.LNVEVDAAPTVDL<br>NR.V            |                                               |
|     |              |      |       | 273 - 293 | 821.77  | 34    | K.QVVSSSEQLQSY<br>QAEIILRR.T       |                                               |
|     |              |      |       | 190 - 204 | 851.95  | 56.1  | K.SDLEAQVESLKEE<br>LL.C            |                                               |
|     |              |      |       | 294 - 309 | 918.01  | 119.5 | R.TVNALEVELQAQH<br>NLR.D           |                                               |
|     |              |      |       | 374 - 399 | 948.08  | 29.8  | R.GLLDSEDSKLPSN<br>PCATTNASSNFCR.S | Carbamidomethyl:<br>15, 25; Deamidated:<br>13 |
|     |              |      |       | 383 - 399 | 948.89  | 131.1 | K.LPSNPCATTNASS<br>NFCR.S          | Carbamidomethyl:<br>6, 16                     |
|     |              |      |       | 192 - 207 | 951.56  | 91.5  | D.LEAQVESLKEELL<br>CLK.K           | Carbamidomethyl:<br>14                        |
|     |              |      |       | 294 - 310 | 975.49  | 35    | R.TVNALEVELQAQH<br>NLRD.S          |                                               |
|     |              |      |       | 190 - 207 | 1052.61 | 101.7 | K.SDLEAQVESLKEE<br>LLCLK.K         | Carbamidomethyl:<br>16                        |
|     |              |      |       | 190 - 207 | 1053.06 | 61.2  | K.SDLEAQVESLKEE<br>LLCLK.K         | Carbamidomethyl:<br>16; Deamidated: 6         |
|     |              |      |       | 108 - 124 | 1079.54 | 90.8  | R.SQQQEPLLCPNY<br>QSYFR.T          | Carbamidomethyl: 9                            |
| K6L | gij999000080 | 38.5 | 470.9 | 38 - 44   | 414.24  | 45    | K.FASFIDK.V                        |                                               |

|         |              |      |        |           |        |      |                         |                                     |
|---------|--------------|------|--------|-----------|--------|------|-------------------------|-------------------------------------|
| Partial |              |      |        |           |        |      |                         |                                     |
|         |              |      |        | 47 - 53   | 453.78 | 38.1 | R.FLEQQNK.V             |                                     |
|         |              |      |        | 127 - 137 | 610.87 | 78   | R.TAAENEFVVLK.K         |                                     |
|         |              |      |        | 193 - 204 | 665.39 | 90.1 | R.NLDLDSIAEVK.A         |                                     |
|         |              |      |        | 127 - 138 | 674.93 | 76.7 | R.TAAENEFVVLKK.<br>D    |                                     |
|         |              |      |        | 127 - 141 | 839.42 | 39.7 | R.TAAENEFVVLKKD<br>VD.A |                                     |
| K75     | gij999000081 | 58.8 | 465.9  | 155 - 161 | 414.24 | 45   | K.FASFIDK.V             |                                     |
|         |              |      |        | 164 - 170 | 453.78 | 38.1 | R.FLEQQNK.V             |                                     |
|         |              |      |        | 242 - 252 | 597.33 | 57.3 | R.TAAENEFVALK.N         | Deamidated: 5                       |
|         |              |      |        | 308 - 319 | 651.91 | 98.8 | R.SLDLDSIAEVK.A         |                                     |
|         |              |      |        | 385 - 396 | 665.27 | 37.5 | A.NLQTAIADAQR.<br>G     |                                     |
| K83     | gij312283588 | 53.9 | 5586.4 | 39 - 44   | 378.16 | 29.4 | R.GISCYR.G              | Carbamidomethyl: 4                  |
|         |              |      |        | 122 - 128 | 406.27 | 52.8 | R.FAAFIDK.V             |                                     |
|         |              |      |        | 45 - 53   | 426.23 | 56.9 | R.GLTGGFGSR.S           |                                     |
|         |              |      |        | 131 - 137 | 453.78 | 38.1 | R.FLEQQNK.L             |                                     |
|         |              |      |        | 402 - 413 | 473.97 | 42.5 | K.LGLDIEIATYRR.L        |                                     |
|         |              |      |        | 31 - 38   | 476.27 | 37.2 | C.CITAAPYR.G            | Carbamidomethyl: 1                  |
|         |              |      |        | 247 - 253 | 476.29 | 55.1 | R.LYEEEEIR.V            |                                     |
|         |              |      |        | 143 - 149 | 477.29 | 40.7 | K.LQFFQNR.Q             | Deamidated: 6                       |
|         |              |      |        | 143 - 149 | 477.31 | 52.9 | K.LQFFQNR.Q             | Deamidated: 2                       |
|         |              |      |        | 304 - 315 | 478.64 | 55.7 | R.SKCEEIKATVIR.H        | Carbamidomethyl: 3                  |
|         |              |      |        | 259 - 267 | 481.32 | 73.4 | N.ISDTSVIVK.M           |                                     |
|         |              |      |        | 414 - 421 | 487.26 | 77.4 | R.LLEGEEQR.L            |                                     |
|         |              |      |        | 337 - 345 | 487.77 | 52.9 | R.LTAEVENAK.C           |                                     |
|         |              |      |        | 385 - 392 | 497.76 | 58   | K.QDMACLLK.E            | Carbamidomethyl:<br>5; Oxidation: 3 |
|         |              |      |        | 219 - 226 | 499.24 | 48.6 | K.DVDCAYVR.K            | Carbamidomethyl: 4                  |
|         |              |      |        | 199 - 206 | 504.8  | 61.9 | K.YEEEVALR.A            |                                     |
|         |              |      |        | 296 - 303 | 506.29 | 45   | R.AEAESWYR.S            |                                     |
|         |              |      |        | 16 - 29   | 507.9  | 44.6 | R.AFSCVSACGPRP<br>GR.C  | Carbamidomethyl:<br>4, 8            |
|         |              |      |        | 325 - 332 | 508.79 | 37.3 | K.EEINELNR.V            |                                     |
|         |              |      |        | 138 - 149 | 513    | 38.9 | K.LLETKLQFFQNR.<br>Q    |                                     |
|         |              |      |        | 285 - 293 | 519.79 | 74.7 | K.AQYDDIASR.S           |                                     |
|         |              |      |        | 122 - 130 | 533.85 | 68.2 | R.FAAFIDKVR.F           |                                     |
|         |              |      |        | 373 - 382 | 536.28 | 87.2 | K.LAGLEEALQK.A          |                                     |
|         |              |      |        | 414 - 422 | 543.85 | 48.9 | R.LLEGEEQRL.C           |                                     |
|         |              |      |        | 30 - 38   | 556.32 | 53.3 | R.CCITAAPYR.G           | Carbamidomethyl:<br>1, 2            |
|         |              |      |        | 393 - 401 | 564.29 | 56   | K.EYQEVMSK.L            |                                     |
|         |              |      |        | 413 - 421 | 565.32 | 39.4 | R.RLLEGEEQR.L           |                                     |
|         |              |      |        | 336 - 345 | 565.82 | 43.4 | Q.RLTAEVENAK.C          |                                     |
|         |              |      |        | 198 - 206 | 568.81 | 71.5 | K.KYEEEVALR.A           |                                     |
|         |              |      |        | 4 - 15    | 579.8  | 83.5 | C.GFSTVGSFGSR.<br>A     |                                     |
|         |              |      |        | 323 - 336 | 581.32 | 40.2 | R.TKEEINELNRVIQR<br>.L  |                                     |
|         |              |      |        | 383 - 392 | 589.31 | 41.6 | K.AKQDMACLLK.E          | Carbamidomethyl: 7                  |
|         |              |      |        | 207 - 217 | 596.85 | 86.2 | R.ATAENEFVALK.K         |                                     |
|         |              |      |        | 383 - 392 | 597.31 | 52.2 | K.AKQDMACLLK.E          | Carbamidomethyl:<br>7; Oxidation: 5 |
|         |              |      |        | 207 - 217 | 597.33 | 57.3 | R.ATAENEFVALK.K         | Deamidated: 5                       |

|  |  |  |  |           |         |       |                           |                                       |
|--|--|--|--|-----------|---------|-------|---------------------------|---------------------------------------|
|  |  |  |  | 372 - 382 | 600.36  | 88.3  | C.KLAGLEELQK.A            |                                       |
|  |  |  |  | 16 - 26   | 606.28  | 77.3  | R.AFSCVSACGPR.P           | Carbamidomethyl: 4, 8                 |
|  |  |  |  | 306 - 315 | 609.8   | 52.9  | K.CEEIKATVIR.H            | Carbamidomethyl: 1                    |
|  |  |  |  | 170 - 180 | 611.75  | 74.5  | R.EAECVEADSGR.L           | Carbamidomethyl: 4                    |
|  |  |  |  | 426 - 437 | 617.81  | 54.2  | G.VGAVNVCVSSSR.G          | Carbamidomethyl: 7                    |
|  |  |  |  | 323 - 332 | 623.34  | 77    | R.TKEEINELNR.V            |                                       |
|  |  |  |  | 323 - 332 | 623.8   | 53.4  | R.TKEEINELNR.V            | Deamidated: 6                         |
|  |  |  |  | 294 - 303 | 627.79  | 69.4  | R.SRAEAESWYR.S            |                                       |
|  |  |  |  | 402 - 412 | 632.4   | 104.4 | K.LGLDIEIATYR.R           |                                       |
|  |  |  |  | 197 - 206 | 632.86  | 61    | K.KKYEEEEVALR.A           |                                       |
|  |  |  |  | 373 - 384 | 635.9   | 63.4  | K.LAGLEELQKAK.Q           |                                       |
|  |  |  |  | 425 - 437 | 646.29  | 59.3  | E.GVGAVNVCVSSSR.G         | Carbamidomethyl: 8                    |
|  |  |  |  | 207 - 218 | 660.86  | 84.3  | R.ATAENEFVALKK.D          |                                       |
|  |  |  |  | 249 - 253 | 675.25  | 25    | Y.EEEIR.V                 |                                       |
|  |  |  |  | 97 - 108  | 700.88  | 36.4  | L.NLEIDPNAQCVK.Q          | Carbamidomethyl: 10                   |
|  |  |  |  | 322 - 332 | 701.34  | 54.4  | R.RTKEEINELNR.V           |                                       |
|  |  |  |  | 2 - 15    | 710.31  | 112.2 | M.TCGFSTVSGFGSR.A         | Carbamidomethyl: 2                    |
|  |  |  |  | 424 - 437 | 710.81  | 48.8  | C.EGVGAVNVCVSSSR.G        | Carbamidomethyl: 9                    |
|  |  |  |  | 273 - 284 | 710.89  | 78.8  | R.DLNMDCIVAEIK.A          | Carbamidomethyl: 6                    |
|  |  |  |  | 438 - 451 | 711.84  | 103.4 | R.GGVVCGDLCVSGSR.P        | Carbamidomethyl: 5, 9                 |
|  |  |  |  | 273 - 284 | 718.88  | 58.2  | R.DLNMDCIVAEIK.A          | Carbamidomethyl: 6; Oxidation: 4      |
|  |  |  |  | 228 - 246 | 740.41  | 29    | K.SDLEANSEALIQEIDFLRR.L   |                                       |
|  |  |  |  | 254 - 267 | 743.94  | 111.1 | R.VLQANISDTSVIVK.M        |                                       |
|  |  |  |  | 254 - 267 | 744.44  | 32.9  | R.VLQANISDTSVIVK.M        | Deamidated: 3                         |
|  |  |  |  | 131 - 142 | 745.89  | 59.5  | R.FLEQQNKLETK.L           |                                       |
|  |  |  |  | 373 - 386 | 757.42  | 53.6  | K.LAGLEELQKAKQD.M         |                                       |
|  |  |  |  | 207 - 221 | 825.44  | 47.4  | R.ATAENEFVALKKD.VD.C      |                                       |
|  |  |  |  | 149 - 168 | 838.7   | 71.9  | N.RQCCESNLEPLFEGYIETLR.R  | Carbamidomethyl: 3, 4                 |
|  |  |  |  | 150 - 169 | 838.74  | 35.2  | R.QCCESNLEPLFEGYIETLR.R.E | Carbamidomethyl: 2, 3                 |
|  |  |  |  | 422 - 437 | 847.41  | 132.1 | R.LCEGVGAVNVCVSSSR.G      | Carbamidomethyl: 2, 11                |
|  |  |  |  | 422 - 437 | 847.92  | 33.8  | R.LCEGVGAVNVCVSSSR.G      | Carbamidomethyl: 2, 11; Deamidated: 9 |
|  |  |  |  | 181 - 196 | 922.98  | 100.7 | R.LSSELNHVQEVLEGYK.K      |                                       |
|  |  |  |  | 181 - 196 | 923.51  | 35.4  | R.LSSELNHVQEVLEGYK.K      | Deamidated: 6                         |
|  |  |  |  | 230 - 245 | 930.97  | 101.4 | D.LEANSEALIQEIDFLR.R      |                                       |
|  |  |  |  | 230 - 245 | 931.5   | 69.4  | D.LEANSEALIQEIDFLR.R      | Deamidated: 4                         |
|  |  |  |  | 351 - 368 | 943.97  | 56.4  | K.LEAAVTQAEQQGEVALND.A    | Deamidated: 17                        |
|  |  |  |  | 91 - 108  | 1013.02 | 82.3  | E.SLLTPLNLEIDPNA          | Carbamidomethyl:                      |

|     |              |      |        |           |         |       |                                            |                                              |
|-----|--------------|------|--------|-----------|---------|-------|--------------------------------------------|----------------------------------------------|
|     |              |      |        |           |         |       | QCVK.Q                                     | 16                                           |
|     |              |      |        | 228 - 245 | 1032.02 | 110   | K.SDLEANSEALIQEI<br>DFLR.R                 |                                              |
|     |              |      |        | 228 - 245 | 1032.48 | 55.8  | K.SDLEANSEALIQEI<br>DFLR.R                 | Deamidated: 12                               |
|     |              |      |        | 228 - 245 | 1032.5  | 48.4  | K.SDLEANSEALIQEI<br>DFLR.R                 | Deamidated: 6                                |
|     |              |      |        | 72 - 101  | 1043.18 | 27.3  | R.SGGVCGPSPPCIT<br>TVSVNESLLTPLNLE<br>ID.P | Carbamidomethyl:<br>5, 11; Deamidated:<br>26 |
|     |              |      |        | 351 - 370 | 1057    | 117.5 | K.LEAAVTQAEQQG<br>EVALNDAR.C               |                                              |
|     |              |      |        | 351 - 370 | 1057.49 | 58.1  | K.LEAAVTQAEQQG<br>EVALNDAR.C               | Deamidated: 7                                |
|     |              |      |        | 351 - 370 | 1057.51 | 114.8 | K.LEAAVTQAEQQG<br>EVALNDAR.C               | Deamidated: 17                               |
|     |              |      |        | 227 - 245 | 1096.02 | 134.5 | R.KSDLEANSEALIQ<br>EIDFLR.R                |                                              |
|     |              |      |        | 150 - 168 | 1179.53 | 86.9  | R.QCCESNLEPLFEG<br>YIETLR.R                | Carbamidomethyl:<br>2, 3                     |
|     |              |      |        | 150 - 168 | 1180.02 | 79.8  | R.QCCESNLEPLFEG<br>YIETLR.R                | Carbamidomethyl:<br>2, 3; Deamidated: 1      |
| K85 | gij164652870 | 56.3 | 3489.4 | 70 - 76   | 448.74  | 45.6  | D.VDCAYLR.K                                | Carbamidomethyl: 3                           |
|     |              |      |        | 252 - 263 | 473.97  | 42.5  | K.LGLDIEIATYRR.L                           |                                              |
|     |              |      |        | 109 - 117 | 481.32  | 73.4  | H.ISDTSVIVK.M                              |                                              |
|     |              |      |        | 264 - 271 | 487.26  | 77.4  | R.LLEGEEQR.L                               |                                              |
|     |              |      |        | 187 - 195 | 494.81  | 52.9  | R.LTAEIENAK.C                              |                                              |
|     |              |      |        | 235 - 242 | 497.76  | 58    | K.QDMACLLK.E                               | Carbamidomethyl:<br>5; Oxidation: 3          |
|     |              |      |        | 49 - 56   | 504.8   | 61.9  | K.YEEEVALR.A                               |                                              |
|     |              |      |        | 69 - 76   | 506.28  | 41.2  | K.DVDCAYL.R.K                              | Carbamidomethyl: 4                           |
|     |              |      |        | 146 - 153 | 506.29  | 45    | R.AEAESWYR.S                               |                                              |
|     |              |      |        | 175 - 182 | 508.79  | 37.3  | K.EEINELNR.V                               |                                              |
|     |              |      |        | 135 - 143 | 519.79  | 74.7  | K.AQYDDIASR.S                              |                                              |
|     |              |      |        | 328 - 337 | 523.18  | 59    | R.ASSFSCGSSR.S                             | Carbamidomethyl: 6                           |
|     |              |      |        | 223 - 232 | 536.28  | 87.2  | K.LAGLEEALQK.A                             |                                              |
|     |              |      |        | 264 - 272 | 543.85  | 48.9  | R.LLEGEEQRL.C                              |                                              |
|     |              |      |        | 243 - 251 | 564.29  | 56    | K.EYQEVMSK.L                               |                                              |
|     |              |      |        | 263 - 271 | 565.32  | 39.4  | R.RLLEGEEQR.L                              |                                              |
|     |              |      |        | 48 - 56   | 568.81  | 71.5  | K.KYEEEVALR.A                              |                                              |
|     |              |      |        | 68 - 76   | 570.29  | 38.8  | K.KDVEDCAYL.R.K                            | Carbamidomethyl: 5                           |
|     |              |      |        | 173 - 186 | 581.32  | 40.2  | R.TKEEINELNRVIQR<br>.L                     |                                              |
|     |              |      |        | 233 - 242 | 589.31  | 41.6  | K.AKQDMACLLK.E                             | Carbamidomethyl: 7                           |
|     |              |      |        | 233 - 242 | 597.31  | 52.2  | K.AKQDMACLLK.E                             | Carbamidomethyl:<br>7; Oxidation: 5          |
|     |              |      |        | 20 - 30   | 600.31  | 28    | R.EAEHVEADSGR.L                            |                                              |
|     |              |      |        | 222 - 232 | 600.36  | 88.3  | S.KLAGLEEALQK.A                            |                                              |
|     |              |      |        | 57 - 67   | 610.87  | 78    | R.ATAENEFVVLK.K                            |                                              |
|     |              |      |        | 173 - 182 | 623.34  | 77    | R.TKEEINELNR.V                             |                                              |
|     |              |      |        | 173 - 182 | 623.8   | 53.4  | R.TKEEINELNR.V                             | Deamidated: 6                                |
|     |              |      |        | 144 - 153 | 627.79  | 69.4  | R.SRAEAESWYR.S                             |                                              |
|     |              |      |        | 252 - 262 | 632.4   | 104.4 | K.LGLDIEIATYR.R                            |                                              |
|     |              |      |        | 47 - 56   | 632.86  | 61    | K.KYEEEVALR.A                              |                                              |
|     |              |      |        | 223 - 234 | 635.9   | 63.4  | K.LAGLEEALQKAK.<br>Q                       |                                              |
|     |              |      |        | 221 - 232 | 643.91  | 98.3  | R.SKLAGLEEALQK.<br>A                       |                                              |

|        |              |      |       |           |         |       |                                  |                                             |
|--------|--------------|------|-------|-----------|---------|-------|----------------------------------|---------------------------------------------|
|        |              |      |       | 31 - 47   | 653.06  | 54.8  | R.LASELNHVQEVLE<br>GYKK.K        |                                             |
|        |              |      |       | 57 - 68   | 674.93  | 76.7  | R.ATAENEFVVLKK.<br>D             |                                             |
|        |              |      |       | 172 - 182 | 701.34  | 54.4  | R.RTKEEINELNR.V                  |                                             |
|        |              |      |       | 123 - 134 | 703.88  | 60.2  | R.DLNMDCVVAEIK.<br>A             | Carbamidomethyl: 6                          |
|        |              |      |       | 77 - 95   | 712.4   | 54.3  | R.KSDLEANVEALVE<br>ESNFLK.R      |                                             |
|        |              |      |       | 274 - 287 | 718.83  | 74.6  | C.EGVGSVNVCVSS<br>SR.G           | Carbamidomethyl: 9                          |
|        |              |      |       | 104 - 117 | 755.46  | 72.2  | Q.ILNAHISDTSVIVK.<br>M           |                                             |
|        |              |      |       | 288 - 303 | 757.34  | 91.5  | R.GGVACGGLTYSS<br>TAGR.Q         | Carbamidomethyl: 5                          |
|        |              |      |       | 223 - 236 | 757.42  | 53.6  | K.LAGLEEALQKAKQ<br>D.M           |                                             |
|        |              |      |       | 199 - 220 | 762.39  | 93.1  | R.TKLEAAVAEAEQQ<br>GEAALNDAR.S   |                                             |
|        |              |      |       | 77 - 96   | 764.42  | 102.5 | R.KSDLEANVEALVE<br>ESNFLK.R      |                                             |
|        |              |      |       | 97 - 117  | 800.75  | 77    | R.LYDEEIQILNAHIS<br>DTSVIVK.M    |                                             |
|        |              |      |       | 57 - 71   | 839.42  | 39.7  | R.ATAENEFVVLKKD<br>VD.C          |                                             |
|        |              |      |       | 272 - 287 | 855.39  | 126.5 | R.LCEGVGSVNVCV<br>SSSR.G         | Carbamidomethyl:<br>2, 11                   |
|        |              |      |       | 31 - 46   | 914.96  | 68.4  | R.LASELNHVQEVLE<br>GYK.K         |                                             |
|        |              |      |       | 78 - 95   | 1004.03 | 115.4 | K.SDLEANVEALVEE<br>SNFLK.R       |                                             |
|        |              |      |       | 201 - 220 | 1028.48 | 148.2 | K.LEAAVAEAEQQG<br>EAALNDAR.S     |                                             |
|        |              |      |       | 1 - 18    | 1108.55 | 38.9  | -<br>.CCESNLEPLFNGYI<br>ETLR.R   | Carbamidomethyl:<br>1, 2; Deamidated: 5     |
|        |              |      |       | 199 - 220 | 1143.5  | 76.3  | R.TKLEAAVAEAEQQ<br>GEAALNDAR.S   | Deamidated: 19                              |
|        |              |      |       | 304 - 327 | 1191.6  | 54.1  | R.QIASGPVATGCSI<br>TVLAPDSCQPR.A | Carbamidomethyl:<br>21                      |
| KAP7   | gij224555962 | 8.8  | 152.9 | 27 - 40   | 719.4   | 60.3  | R.ATPLNCVVPLGSP<br>L.G           | Carbamidomethyl: 6                          |
|        |              |      |       | 4 - 23    | 822.01  | 66.5  | R.FFCCGSYFPGYP<br>SYGTNFHR.T     | Carbamidomethyl:<br>3, 4                    |
|        |              |      |       | 27 - 43   | 857.94  | 26    | R.ATPLNCVVPLGSP<br>LGYG.C        | Carbamidomethyl: 6                          |
| KAP3.2 | gij229307    | 10.3 | 666   | 12 - 23   | 619.26  | 88.4  | R.TGPATTICSSDK.F                 | Carbamidomethyl: 8                          |
|        |              |      |       | 27 - 37   | 644.28  | 59.7  | R.CGVCLPSTCPH.N                  | Carbamidomethyl:<br>1, 4, 9                 |
|        |              |      |       | 12 - 24   | 692.84  | 71.4  | R.TGPATTICSSDKF.<br>C            | Carbamidomethyl: 8                          |
|        |              |      |       | 27 - 38   | 701.32  | 51.4  | R.CGVCLPSTCPHN.I                 | Carbamidomethyl:<br>1, 4, 9                 |
|        |              |      |       | 85 - 96   | 729.81  | 71    | F.IQPGCENVCEPR.<br>C             | Carbamidomethyl:<br>5, 9                    |
|        |              |      |       | 12 - 25   | 772.81  | 42.2  | R.TGPATTICSSDKF<br>C.R           | Carbamidomethyl:<br>8, 14                   |
|        |              |      |       | 12 - 26   | 850.86  | 88.1  | R.TGPATTICSSDKF<br>CR.C          | Carbamidomethyl:<br>8, 14                   |
|        |              |      |       | 83 - 96   | 854.37  | 64.2  | T.TFIQPGCENVCEP<br>R.C           | Carbamidomethyl:<br>7, 11; Deamidated:<br>4 |
|        |              |      |       | 27 - 42   | 914.43  | 36.6  | R.CGVCLPSTCPHNI<br>SLL.Q         | Carbamidomethyl:<br>1, 4, 9                 |
|        |              |      |       | 72 - 96   | 919.76  | 70.6  | H.PTPGLSGINLTTFI                 | Carbamidomethyl:                            |

|                                               |              |       |       |                  |        |       |                              |                               |
|-----------------------------------------------|--------------|-------|-------|------------------|--------|-------|------------------------------|-------------------------------|
|                                               |              |       |       |                  |        |       | QPGCENVCEPR.C                | 18, 22                        |
| K25                                           | gij57619201  | 49.3  | 238   | 81 - 89          | 553.83 | 69.4  | K.VTMQNLNDR.L                | Oxidation: 3                  |
|                                               |              |       |       | 269 - 277        | 555.29 | 59.8  | R.DAEAWFNEK.S                |                               |
|                                               |              |       |       | 90 - 99          | 568.87 | 51.8  | R.LASYLENVRA.L               | Deamidated: 7                 |
| KAP1.4                                        |              | 18.9  | 460.4 | 98 - 109         | 546.35 | 41.7  | Y.GQVGSSGAVSSR.<br>T         |                               |
|                                               |              |       |       | 97 - 109         | 627.88 | 69.1  | D.YGQVGSSGAVSS<br>R.T        |                               |
|                                               |              |       |       | 119 - 132        | 782.83 | 37.8  | R.VEGTSLPCCVVS<br>C.T        | Carbamidomethyl:<br>9, 10, 14 |
|                                               |              |       |       | 100 - 109        | 906.45 | 47.6  | Q.VGSSGAVSSR.T               |                               |
| KAP24.<br>1                                   | gij400531466 | 27.8  | 292.4 | 224 - 236        | 694.42 | 40.8  | R.SLSSIPSSFPLR.<br>Y         |                               |
|                                               |              |       |       | 17 - 29          | 727.91 | 47.5  | R.THYYFPVTGSVAL<br>.C        |                               |
|                                               |              |       |       | 171 - 186        | 866.41 | 57.5  | R.SYQDLGFIPSGFS<br>ASR.Y     |                               |
|                                               |              |       |       | 17 - 32          | 929.46 | 105.4 | R.THYYFPVTGSVAL<br>CSR.H     | Carbamidomethyl:<br>14        |
| PREDI<br>CTED:<br>desmoc<br>ollin-3           | gij426253651 | 93.7  | 123.1 | 282 - 290        | 553.84 | 56.6  | K.YSILEQTPR.S                |                               |
| PREDI<br>CTED:<br>desmo<br>glein-4            | gij426253981 | 113.8 | 477.6 | 448 - 455        | 469.27 | 76.8  | R.TGEIQFSR.E                 |                               |
|                                               |              |       |       | 1,037 -<br>1,045 | 570.25 | 49.6  | R.YSNIHYSQQ.-                |                               |
|                                               |              |       |       | 139 - 149        | 663.9  | 25.3  | R.GEDLERPLELR.V              |                               |
|                                               |              |       |       | 583 - 593        | 671.39 | 66.7  | R.ACELPQIIELR.A              | Carbamidomethyl: 2            |
|                                               |              |       |       | 1,019 -<br>1,031 | 675.82 | 72.5  | R.ISQTSSTSPVTSR.<br>H        |                               |
|                                               |              |       |       | 92 - 110         | 677.41 | 61.8  | R.ISGAGIDRPPYGV<br>FTINPR.T  |                               |
|                                               |              |       |       | 974 - 993        | 678.98 | 43.2  | R.VVSSPGRPDVSS<br>SSVSDGCR.G | Carbamidomethyl:<br>19        |
|                                               |              |       |       | 123 - 133        | 712.9  | 57.7  | R.EITPLFLIYCR.A              | Carbamidomethyl:<br>10        |
| PREDI<br>CTED:<br>junction<br>plakogl<br>obin | gij426238025 | 81.7  | 407.3 | 217 - 224        | 445.83 | 39.4  | R.EGLLAIFK.S                 |                               |
|                                               |              |       |       | 116 - 124        | 499.86 | 57.6  | R.LAEPSSLK.S                 |                               |
|                                               |              |       |       | 478 - 487        | 544.38 | 39.2  | R.LNYGIPAIVK.L               |                               |
|                                               |              |       |       | 664 - 674        | 618.92 | 76.7  | R.VSVELTNSLFK.H              |                               |
|                                               |              |       |       | 178 - 191        | 714.44 | 59.7  | R.ALMGSPQLVAAV<br>VR.T       | Oxidation: 3                  |
|                                               |              |       |       | 638 - 651        | 742.4  | 76.1  | R.NEGTATYAAVLF<br>R.I        |                               |
|                                               |              |       |       | 427 - 444        | 968.08 | 39.6  | K.TLVTQNSGVEALI<br>HAILR.A   |                               |
| PREDI<br>CTED:<br>K14-<br>like                | gij426238017 | 48.5  | 341.8 | 159 - 165        | 404.21 | 58.2  | R.LAADDFR.T                  |                               |
|                                               |              |       |       | 90 - 96          | 405.24 | 58.6  | R.LASYLDK.V                  |                               |
|                                               |              |       |       | 188 - 196        | 515.34 | 54    | R.VLDELTLAR.A                |                               |
|                                               |              |       |       | 81 - 89          | 553.83 | 69.4  | K.VTMQNLNDR.L                | Oxidation: 3                  |
|                                               |              |       |       | 168 - 173        | 768.34 | 26.5  | K.YETELN.L                   |                               |
| PREDI                                         | gij426238013 | 43.8  | 359.2 | 160 - 166        | 404.21 | 58.2  | R.LAADDFR.T                  |                               |



|                       |              |      |        |           |         |       |                                  |                                                  |
|-----------------------|--------------|------|--------|-----------|---------|-------|----------------------------------|--------------------------------------------------|
| CTED:<br>K19          |              |      |        |           |         |       |                                  |                                                  |
|                       |              |      |        | 90 - 96   | 412.26  | 54    | R.LASYLEK.V                      |                                                  |
|                       |              |      |        | 89 - 96   | 490.3   | 48.4  | D.RLASYLEK.V                     |                                                  |
|                       |              |      |        | 189 - 197 | 515.34  | 54    | R.VLDELTLAR.T                    |                                                  |
|                       |              |      |        | 90 - 98   | 539.84  | 72.4  | R.LASYLEKVR.A                    |                                                  |
|                       |              |      |        | 382 - 392 | 650.86  | 29.2  | R.NLLEGQDAYYN.D                  | Deamidated: 6                                    |
| PREDI<br>CTED:<br>K20 | gij426237957 | 48.3 | 178.7  | 81 - 89   | 553.88  | 68.6  | R.LASYLERVR.S                    |                                                  |
| PREDI<br>CTED:<br>K39 | gij426239024 | 56.9 | 563.4  | 121 - 127 | 426.25  | 33.9  | R.LANYLEK.V                      | Deamidated: 3                                    |
|                       |              |      |        | 163 - 170 | 494.8   | 59.2  | A.TIEELQQK.I                     |                                                  |
|                       |              |      |        | 230 - 238 | 508.8   | 49.9  | D.LEAQVQSLK.E                    | Deamidated: 6                                    |
|                       |              |      |        | 236 - 245 | 616.89  | 48    | Q.SLKEELLCLK.N                   | Carbamidomethyl: 8                               |
|                       |              |      |        | 401 - 411 | 699.37  | 29.1  | K.SRLECEIATYR.S                  | Carbamidomethyl: 5                               |
|                       |              |      |        | 234 - 245 | 730.94  | 75.6  | Q.VQSLKEELLCLK.N                 | Carbamidomethyl:<br>10; Deamidated: 2            |
|                       |              |      |        | 348 - 360 | 755.28  | 36    | R.DSQECALTETEAR<br>.Y            | Carbamidomethyl: 5                               |
|                       |              |      |        | 213 - 227 | 777.5   | 61    | D.ANGLQQILNALTL<br>GK.A          |                                                  |
|                       |              |      |        | 360 - 383 | 926.13  | 26    | A.RYAALLAQTQCLI<br>DNLEAQLAEIR.G | Carbamidomethyl:<br>11; Deamidated: 8,<br>15, 19 |
|                       |              |      |        | 230 - 245 | 951.56  | 91.5  | D.LEAQVQSLKEELL<br>CLK.N         | Carbamidomethyl:<br>14; Deamidated: 6            |
|                       |              |      |        | 228 - 245 | 1044.03 | 29.6  | K.ADLEAQVQSLKEE<br>LLCLK.N       | Carbamidomethyl:<br>16                           |
| PREDI<br>CTED:<br>K82 | gij426224444 | 56.7 | 1269.7 | 129 - 135 | 414.24  | 45    | R.FASFINK.V                      | Deamidated: 6                                    |
|                       |              |      |        | 138 - 144 | 453.78  | 38.1  | R.FLEQKNK.L                      |                                                  |
|                       |              |      |        | 409 - 420 | 473.97  | 42.5  | K.LGLDIEIATYRR.L                 |                                                  |
|                       |              |      |        | 421 - 428 | 487.26  | 77.4  | R.LLEGEEQR.L                     |                                                  |
|                       |              |      |        | 392 - 399 | 497.76  | 58    | K.QDMACLK.E                      | Carbamidomethyl:<br>5; Oxidation: 3              |
|                       |              |      |        | 380 - 389 | 536.28  | 87.2  | K.LAGLEEALQK.A                   |                                                  |
|                       |              |      |        | 292 - 300 | 540.28  | 28.3  | K.AQYDEIANR.S                    |                                                  |
|                       |              |      |        | 421 - 429 | 543.85  | 48.9  | R.LLEGEEQRL.C                    |                                                  |
|                       |              |      |        | 400 - 408 | 564.29  | 56    | K.EYQEVMSK.L                     |                                                  |
|                       |              |      |        | 420 - 428 | 565.32  | 39.4  | R.RLLEGEEQR.L                    |                                                  |
|                       |              |      |        | 390 - 399 | 589.31  | 41.6  | K.AKQDMACLK.E                    | Carbamidomethyl: 7                               |
|                       |              |      |        | 390 - 399 | 597.31  | 52.2  | K.AKQDMACLK.E                    | Carbamidomethyl:<br>7; Oxidation: 5              |
|                       |              |      |        | 379 - 389 | 600.36  | 88.3  | C.KLAGLEEALQK.A                  |                                                  |
|                       |              |      |        | 16 - 26   | 605.81  | 50.1  | R.SFSSCSAVLPR.V                  | Carbamidomethyl: 5                               |
|                       |              |      |        | 409 - 419 | 632.4   | 104.4 | K.LGLDIEIATYR.R                  |                                                  |
|                       |              |      |        | 380 - 391 | 635.9   | 63.4  | K.LAGLEEALQKAK.<br>Q             |                                                  |
|                       |              |      |        | 380 - 393 | 757.42  | 53.6  | K.LAGLEEALQKAKQ<br>D.M           |                                                  |
| PREDI<br>CTED:<br>K84 | gij426224440 | 64.1 | 451    | 168 - 174 | 414.24  | 45    | K.FASFIDK.V                      |                                                  |
|                       |              |      |        | 177 - 183 | 453.78  | 38.1  | R.FLEQQNK.L                      |                                                  |
|                       |              |      |        | 244 - 253 | 597.32  | 36.9  | K.KYEEVGLRA.S                    |                                                  |
|                       |              |      |        | 530 - 542 | 629.86  | 71.2  | R.VGGGDLGVC<br>R.G               | Carbamidomethyl:<br>12                           |

|                                |              |      |        |           |         |      |                            |                                         |
|--------------------------------|--------------|------|--------|-----------|---------|------|----------------------------|-----------------------------------------|
|                                |              |      |        | 448 - 458 | 639.39  | 77.7 | K.LALDIEIATYR.R            |                                         |
|                                |              |      |        | 177 - 188 | 745.89  | 59.5 | R.FLEQQNKLETK.<br>W        |                                         |
| PREDI<br>CTED:<br>K85-<br>like | gil426226634 | 56.3 | 1455.2 | 149 - 155 | 406.27  | 52.8 | R.FAAFIDK.V                |                                         |
|                                |              |      |        | 158 - 164 | 453.78  | 38.1 | R.FLEQQNK.L                |                                         |
|                                |              |      |        | 170 - 176 | 484.75  | 45.1 | K.LQFYQNR.Q                |                                         |
|                                |              |      |        | 170 - 176 | 485.29  | 41.2 | K.LQFYQNR.Q                | Deamidated: 6                           |
|                                |              |      |        | 364 - 372 | 487.77  | 52.9 | R.LTAEVENAK.Q              |                                         |
|                                |              |      |        | 406 - 413 | 497.76  | 58   | K.QDMACLLK.E               | Carbamidomethyl:<br>5; Oxidation: 3     |
|                                |              |      |        | 352 - 359 | 508.79  | 37.3 | K.EEINELNR.V               |                                         |
|                                |              |      |        | 149 - 157 | 533.85  | 68.2 | R.FAAFIDKVR.F              |                                         |
|                                |              |      |        | 394 - 403 | 550.37  | 75.7 | K.LVGLLEEALQK.A            |                                         |
|                                |              |      |        | 414 - 422 | 564.29  | 56   | K.EYQEVMSK.L               |                                         |
|                                |              |      |        | 363 - 372 | 565.82  | 43.4 | Q.RLTAEVENAK.Q             |                                         |
|                                |              |      |        | 350 - 363 | 581.32  | 40.2 | R.TKEEINELNRVIQR<br>.L     |                                         |
|                                |              |      |        | 404 - 413 | 589.31  | 41.6 | K.AKQDMACLLK.E             | Carbamidomethyl: 7                      |
|                                |              |      |        | 81 - 90   | 596.33  | 47.1 | R.ISVSYAWPLR.G             |                                         |
|                                |              |      |        | 404 - 413 | 597.31  | 52.2 | K.AKQDMACLLK.E             | Carbamidomethyl:<br>7; Oxidation: 5     |
|                                |              |      |        | 393 - 403 | 614.36  | 48.3 | C.KLVGLLEEALQK.A           |                                         |
|                                |              |      |        | 350 - 359 | 623.34  | 77   | R.TKEEINELNR.V             |                                         |
|                                |              |      |        | 350 - 359 | 623.8   | 53.4 | R.TKEEINELNR.V             | Deamidated: 6                           |
|                                |              |      |        | 197 - 207 | 627.74  | 42.5 | R.EAECMEADSGR.L            | Carbamidomethyl: 4                      |
|                                |              |      |        | 338 - 348 | 645.82  | 42.7 | K.VMVTQQGENLR.R            | Oxidation: 2                            |
|                                |              |      |        | 349 - 359 | 701.34  | 54.4 | R.RTKEEINELNR.V            |                                         |
|                                |              |      |        | 158 - 169 | 745.89  | 59.5 | R.FLEQQNKLETK.L            |                                         |
|                                |              |      |        | 165 - 176 | 776.94  | 66.3 | K.LLETKLQFYQNR.<br>Q       |                                         |
|                                |              |      |        | 457 - 472 | 801.91  | 66.2 | R.SQGGVICGDLGST<br>VPR.G   | Carbamidomethyl: 7                      |
|                                |              |      |        | 158 - 176 | 814.79  | 33.6 | R.FLEQQNKLETKL<br>QFYQNR.Q | Deamidated: 4, 6                        |
|                                |              |      |        | 178 - 195 | 1108.55 | 38.9 | Q.CCESNLEPLFNGY<br>IETLR.R | Carbamidomethyl:<br>1, 2; Deamidated: 5 |
| PREDI<br>CTED:<br>K1b          | gil426224420 | 60.9 | 348    | 183 - 189 | 414.24  | 45   | K.FASFIDK.V                |                                         |
|                                |              |      |        | 192 - 198 | 453.78  | 38.1 | R.FLEQQNQ.V                |                                         |
|                                |              |      |        | 369 - 378 | 589.83  | 43.9 | K.YQELQITAGR.H             |                                         |
|                                |              |      |        | 369 - 378 | 590.35  | 51.5 | K.YQELQITAGR.H             | Deamidated: 2                           |
|                                |              |      |        | 192 - 203 | 738.38  | 84.2 | R.FLEQQNQVLQTK.<br>W       |                                         |
| PREDI<br>CTED:<br>K7           | gil426224448 | 50.3 | 541.4  | 90 - 96   | 414.24  | 45   | K.FASFIDK.V                |                                         |
|                                |              |      |        | 99 - 105  | 453.78  | 38.1 | R.FLEQQNK.L                |                                         |
|                                |              |      |        | 176 - 186 | 610.87  | 78   | R.TAAENEFVVLK.K            |                                         |
|                                |              |      |        | 371 - 381 | 639.39  | 77.7 | K.LALDIEIATYR.K            |                                         |
|                                |              |      |        | 176 - 187 | 674.93  | 76.7 | R.TAAENEFVVLK.<br>D        |                                         |
|                                |              |      |        | 99 - 110  | 745.89  | 59.5 | R.FLEQQNKLETK.<br>W        |                                         |
|                                |              |      |        | 176 - 190 | 839.42  | 39.7 | R.TAAENEFVVLK.<br>VD.V     |                                         |

|                                |              |      |       |           |         |      |                                    |                                                     |
|--------------------------------|--------------|------|-------|-----------|---------|------|------------------------------------|-----------------------------------------------------|
| PREDICTED:<br>KAP10-<br>8-like | gij426218385 | 29.5 | 150.1 | 59 - 68   | 567.35  | 46.5 | R.LTLLCAPVSC.E                     | Carbamidomethyl:<br>5, 10                           |
|                                |              |      |       | 59 - 68   | 567.35  | 46.5 | R.LTLLCAPVSC.E                     | Carbamidomethyl:<br>5, 10                           |
|                                |              |      |       | 175 - 186 | 687.37  | 69.4 | R.PASCLSLCQPK.<br>C                | Carbamidomethyl:<br>4, 9                            |
|                                |              |      |       | 271 - 284 | 774.89  | 85.8 | R.LACGIPTSAPELC<br>C.-             | Carbamidomethyl:<br>3, 13, 14                       |
| PREDICTED:<br>KAP12-<br>2-like | gij426219523 | 10.1 | 156.1 | 40 - 53   | 775.87  | 67.1 | R.PAVYVTPSCQSSV<br>R.L             | Carbamidomethyl: 9                                  |
|                                |              |      |       | 40 - 53   | 776.37  | 58.2 | R.PAVYVTPSCQSSV<br>R.L             | Carbamidomethyl:<br>9; Deamidated: 10               |
| PREDICTED:<br>KAP13-<br>1-like | gij426217167 | 17.5 | 631.6 | 142 - 148 | 421.23  | 41   | R.PTFSSR.S                         |                                                     |
|                                |              |      |       | 137 - 143 | 429.25  | 42.4 | R.SSFYRPT.F                        |                                                     |
|                                |              |      |       | 14 - 20   | 434.75  | 36   | R.SLQDHLR.Y                        |                                                     |
|                                |              |      |       | 34 - 40   | 434.75  | 36   | R.SLQDHLR.T                        |                                                     |
|                                |              |      |       | 137 - 144 | 502.81  | 41.7 | R.SSFYRPTF.F                       |                                                     |
|                                |              |      |       | 137 - 145 | 576.35  | 49.5 | R.SSFYRPTFF.S                      |                                                     |
|                                |              |      |       | 116 - 127 | 601.23  | 52.8 | R.SSSCSSLSSGSR.<br>S               | Carbamidomethyl: 4                                  |
|                                |              |      |       | 126 - 136 | 634.84  | 36.7 | H.SPNIFSSLSCR.S                    | Carbamidomethyl:<br>10; Deamidated: 3               |
|                                |              |      |       | 64 - 80   | 676.34  | 44.9 | R.TQTVSSPCQTS<br>CYRPR.T           | Carbamidomethyl:<br>9, 13                           |
|                                |              |      |       | 64 - 80   | 676.66  | 41.8 | R.TQTVSSPCQTS<br>CYRPR.T           | Carbamidomethyl:<br>9, 13; Deamidated:<br>10        |
|                                |              |      |       | 64 - 80   | 676.98  | 27.5 | R.TQTVSSPCQTS<br>CYRPR.T           | Carbamidomethyl:<br>9, 13; Deamidated:<br>2, 10     |
|                                |              |      |       | 149 - 164 | 861.91  | 76.7 | R.SGQSLSFQPTCG<br>SGFY.-           | Carbamidomethyl:<br>11                              |
|                                |              |      |       | 149 - 164 | 862.41  | 83.6 | R.SGQSLSFQPTCG<br>SGFY.-           | Carbamidomethyl:<br>11; Deamidated: 3               |
|                                |              |      |       | 168 - 183 | 964.4   | 43   | R.SCPSSCYRPTCG<br>SVFY.-           | Carbamidomethyl:<br>2, 6, 11                        |
|                                |              |      |       | 38 - 63   | 1012.74 | 51.5 | S.TDLCSPSSCQLGS<br>SLYSQETCCEPIR.T | Carbamidomethyl:<br>4, 9, 21, 22;<br>Deamidated: 10 |
|                                |              |      |       | 54 - 79   | 1012.74 | 51.5 | S.TDLCSPSSCQLGS<br>SLYSQETCCEPIR.T | Carbamidomethyl:<br>4, 9, 21, 22;<br>Deamidated: 10 |
|                                |              |      |       | 142 - 160 | 1017.47 | 61.9 | R.LGYGICGFPVLSS<br>GSGFCR.P        | Carbamidomethyl:<br>6, 18                           |
|                                |              |      |       | 97 - 115  | 1054.48 | 99.2 | R.TSTFSSPCQTTFP<br>GSLAYR.S        | Carbamidomethyl: 8                                  |
|                                |              |      |       | 97 - 115  | 1054.97 | 96.4 | R.TSTFSSPCQTTFP<br>GSLAYR.S        | Carbamidomethyl:<br>8; Deamidated: 9                |
| PREDICTED:<br>KAP16-<br>1-like | gij426239028 | 82.3 | 517.2 | 27 - 36   | 566.78  | 39.4 | R.GPVCLPSSCR.S                     | Carbamidomethyl:<br>4, 9                            |
|                                |              |      |       | 626 - 635 | 604.8   | 57.2 | R.SISCEPLSCR.P                     | Carbamidomethyl:<br>4, 9                            |
|                                |              |      |       | 689 - 698 | 614.37  | 42.5 | R.QPYLTSISYR.P                     |                                                     |
|                                |              |      |       | 21 - 36   | 622.28  | 30.6 | S.TEVSCRGPVCLPS<br>SCR.S           | Carbamidomethyl:<br>5, 10, 15                       |

|                                                   |              |      |       |           |         |       |                              |                                                                |
|---------------------------------------------------|--------------|------|-------|-----------|---------|-------|------------------------------|----------------------------------------------------------------|
|                                                   |              |      |       | 555 - 565 | 666.4   | 36.2  | R.VSLVCEPICVR.P              | Carbamidomethyl:<br>5, 9                                       |
|                                                   |              |      |       | 10 - 26   | 961.93  | 93    | K.CPSVPAISLCSTE<br>VSCR.G    | Carbamidomethyl:<br>1, 10, 16                                  |
|                                                   |              |      |       | 422 - 441 | 1115.99 | 108.8 | E.ATICEPSCSVSSC<br>AQPVSUK.A | Carbamidomethyl:<br>4, 8, 13                                   |
| PREDI<br>CTED:<br>KAP4-<br>7-like                 | gil426237983 | 19.6 | 367.9 | 176 - 184 | 563.71  | 61.9  | R.PVCCPSSCC.-                | Carbamidomethyl:<br>3, 4, 8, 9                                 |
|                                                   |              |      |       | 18 - 26   | 607.25  | 49.8  | R.SLCQETCCR.P                | Carbamidomethyl:<br>3, 7, 8                                    |
|                                                   |              |      |       | 18 - 28   | 699.25  | 47.5  | R.SLCQETCCRPS.C              | Carbamidomethyl:<br>3, 7, 8                                    |
|                                                   |              |      |       | 37 - 49   | 767.8   | 56.1  | R.TTCYRPSCGVSS<br>C.C        | Carbamidomethyl:<br>3, 8, 13                                   |
|                                                   |              |      |       | 18 - 36   | 842.27  | 32.7  | R.SLCQETCCRPS<br>CQTCCR.T    | Carbamidomethyl:<br>3, 7, 8, 12, 13, 17,<br>18; Deamidated: 14 |
|                                                   |              |      |       | 117 - 129 | 849.81  | 82.4  | R.CCQSVCCQPSCP<br>R.I        | Carbamidomethyl:<br>1, 2, 6, 7, 11                             |
|                                                   |              |      |       | 117 - 129 | 850.31  | 37.4  | R.CCQSVCCQPSCP<br>R.I        | Carbamidomethyl:<br>1, 2, 6, 7, 11;<br>Deamidated: 3           |
| PREDI<br>CTED:<br>KAP4-<br>7-like<br>isoform<br>2 | gil426237987 | 20.4 | 374.8 | 186 - 194 | 563.71  | 61.9  | R.PVCCPSSCC.-                | Carbamidomethyl:<br>3, 4, 8, 9                                 |
|                                                   |              |      |       | 18 - 26   | 607.25  | 49.8  | R.SLCQETCCR.P                | Carbamidomethyl:<br>3, 7, 8                                    |
|                                                   |              |      |       | 101 - 110 | 671.19  | 68    | Q.PVCCQTTCCR.T               | Carbamidomethyl:<br>3, 4, 8, 9                                 |
|                                                   |              |      |       | 101 - 110 | 671.75  | 58.7  | Q.PVCCQTTCCR.T               | Carbamidomethyl:<br>3, 4, 8, 9;<br>Deamidated: 5               |
|                                                   |              |      |       | 18 - 28   | 699.25  | 47.5  | R.SLCQETCCRPS.C              | Carbamidomethyl:<br>3, 7, 8                                    |
|                                                   |              |      |       | 37 - 49   | 767.8   | 56.1  | R.TTCYRPSCGVSS<br>C.C        | Carbamidomethyl:<br>3, 8, 13                                   |
|                                                   |              |      |       | 18 - 36   | 842.27  | 32.7  | R.SLCQETCCRPS<br>CQTCCR.T    | Carbamidomethyl:<br>3, 7, 8, 12, 13, 17,<br>18; Deamidated: 14 |
| KAP3.4                                            | gil125662    | 10.5 | 349.3 | 27 - 37   | 644.28  | 59.7  | R.CGVCLPSTCPH.T              | Carbamidomethyl:<br>1, 4, 9                                    |
|                                                   |              |      |       | 9 - 23    | 775.85  | 89    | C.SVPTSPATTICSS<br>DK.F      | Carbamidomethyl:<br>11                                         |
|                                                   |              |      |       | 6 - 23    | 992.42  | 69.7  | R.LCCSVPTSPATTI<br>CSSDK.F   | Carbamidomethyl:<br>2, 3, 14                                   |
|                                                   |              |      |       | 6 - 24    | 1065.96 | 71.5  | R.LCCSVPTSPATTI<br>CSSDKF.C  | Carbamidomethyl:<br>2, 3, 14                                   |
|                                                   |              |      |       | 27 - 45   | 1130.51 | 36.9  | R.CGVCLPSTCPHTV<br>WFLQPT.C  | Carbamidomethyl:<br>1, 4, 9                                    |
| KAP2.3                                            | gil125644    | 14.2 | 735.3 | 58 - 63   | 403.68  | 39.6  | R.RPVCCD.P                   | Carbamidomethyl:<br>4, 5                                       |
|                                                   |              |      |       | 41 - 47   | 408.26  | 51.1  | R.PVTFVPR.C                  |                                                                |
|                                                   |              |      |       | 51 - 57   | 466.24  | 38.6  | R.PICEPCR.R                  | Carbamidomethyl:<br>3, 6                                       |
|                                                   |              |      |       | 124 - 131 | 514.76  | 34    | R.TFRTSPCC.-                 | Carbamidomethyl:<br>7, 8                                       |
|                                                   |              |      |       | 58 - 65   | 532.25  | 51    | R.RPVCCDPC.S                 | Carbamidomethyl:<br>4, 5, 8                                    |
|                                                   |              |      |       | 58 - 67   | 632.28  | 50.3  | R.RPVCCDPCSL.Q               | Carbamidomethyl:<br>4, 5, 8                                    |

|                |           |      |      |           |         |       |                                    |                                      |
|----------------|-----------|------|------|-----------|---------|-------|------------------------------------|--------------------------------------|
|                |           |      |      | 48 - 57   | 674.77  | 32.7  | R.CTRPICEPCR.R                     | Carbamidomethyl: 1, 6, 9             |
|                |           |      |      | 58 - 73   | 685.26  | 65.6  | R.RPVCCDPCSLQE<br>GCCR.P           | Carbamidomethyl: 4, 5, 8, 14, 15     |
|                |           |      |      | 10 - 22   | 689.8   | 36.9  | F.SSLSCGGGCLQP<br>R.Y              | Carbamidomethyl: 5, 9                |
|                |           |      |      | 58 - 68   | 696.28  | 37.6  | R.RPVCCDPCSLQ.E                    | Carbamidomethyl: 4, 5, 8             |
|                |           |      |      | 9 - 22    | 763.34  | 39.8  | T.FSSLSCGGGCLQ<br>PR.Y             | Carbamidomethyl: 6, 10               |
|                |           |      |      | 1 - 22    | 782.68  | 58    | -<br>.TGSCCGPTFSSLSC<br>GGGCLQPR.Y | Carbamidomethyl: 4, 5, 14, 18        |
|                |           |      |      | 58 - 70   | 789.3   | 34    | R.RPVCCDPCSLQE<br>G.C              | Carbamidomethyl: 4, 5, 8             |
|                |           |      |      | 58 - 77   | 842.32  | 52.5  | R.RPVCCDPCSLQE<br>GCCRPITC.C       | Carbamidomethyl: 4, 5, 8, 14, 15, 20 |
|                |           |      |      | 5 - 22    | 970.93  | 94    | C.CGPTFSSLSCGG<br>GCLQPR.Y         | Carbamidomethyl: 1, 10, 14           |
| K81<br>Partial | gij125115 | 12.7 | 1967 | 74 - 80   | 448.74  | 45.6  | D.VDCAYLR.K                        | Carbamidomethyl: 3                   |
|                |           |      |      | 101 - 107 | 476.29  | 55.1  | R.LYEEEEIR.V                       |                                      |
|                |           |      |      | 53 - 60   | 504.8   | 61.9  | R.YEEEVALR.A                       |                                      |
|                |           |      |      | 73 - 80   | 506.28  | 41.2  | K.DVDCAYLR.K                       | Carbamidomethyl: 4                   |
|                |           |      |      | 72 - 80   | 570.29  | 38.8  | K.KDVDCAYLR.K                      | Carbamidomethyl: 5                   |
|                |           |      |      | 52 - 60   | 582.83  | 61.5  | R.RYEEEVALR.A                      |                                      |
|                |           |      |      | 61 - 71   | 596.85  | 86.2  | R.ATAENEFVALK.K                    |                                      |
|                |           |      |      | 61 - 71   | 597.33  | 57.3  | R.ATAENEFVALK.K                    | Deamidated: 5                        |
|                |           |      |      | 24 - 34   | 597.73  | 82.5  | R.EAECAEADSGR.L                    | Carbamidomethyl: 4                   |
|                |           |      |      | 90 - 99   | 603.4   | 48.5  | E.ALIQETDFLR.R                     |                                      |
|                |           |      |      | 61 - 72   | 660.86  | 84.3  | R.ATAENEFVALKK.<br>D               |                                      |
|                |           |      |      | 103 - 107 | 675.25  | 25    | Y.EEEIR.V                          |                                      |
|                |           |      |      | 82 - 100  | 740.42  | 30.1  | K.SDLEANVEALIQE<br>TDFLR.L         |                                      |
|                |           |      |      | 81 - 100  | 783.08  | 42.9  | R.KSDLEANVEALIQ<br>ETDFLR.L        |                                      |
|                |           |      |      | 3 - 22    | 825.07  | 35.4  | N.RQCCESNLEPLFS<br>GYIETLR.R       | Carbamidomethyl: 3, 4; Deamidated: 2 |
|                |           |      |      | 61 - 75   | 825.44  | 47.4  | R.ATAENEFVALKKD<br>VD.C            |                                      |
|                |           |      |      | 8 - 22    | 869.98  | 56.4  | E.SNLEPLFSGYIETL<br>R.R            |                                      |
|                |           |      |      | 35 - 50   | 904.98  | 119.8 | R.LSSELNSLQEVLE<br>GYK.R           |                                      |
|                |           |      |      | 35 - 50   | 905.46  | 84.4  | R.LSSELNSLQEVLE<br>GYK.R           | Deamidated: 6                        |
|                |           |      |      | 35 - 50   | 905.97  | 33.2  | R.LSSELNSLQEVLE<br>GYK.R           | Deamidated: 6, 9                     |
|                |           |      |      | 84 - 99   | 931     | 120.1 | D.LEANVEALIQETD<br>FLR.R           |                                      |
|                |           |      |      | 35 - 51   | 983.44  | 70.4  | R.LSSELNSLQEVLE<br>GYKR.R          | Deamidated: 6                        |
|                |           |      |      | 82 - 99   | 1032.01 | 114.9 | K.SDLEANVEALIQE<br>TDFLR.R         |                                      |
|                |           |      |      | 82 - 99   | 1032.55 | 73.3  | K.SDLEANVEALIQE<br>TDFLR.R         | Deamidated: 12                       |
|                |           |      |      | 82 - 99   | 1032.58 | 69.8  | K.SDLEANVEALIQE<br>TDFLR.R         | Deamidated: 6                        |
|                |           |      |      | 81 - 99   | 1096.05 | 175.6 | R.KSDLEANVEALIQ<br>ETDFLR.R        |                                      |
|                |           |      |      | 4 - 22    | 1158.51 | 102.2 | R.QCCESNLEPLFSG<br>YIETLR.R        | Carbamidomethyl: 2, 3                |
