# Supplementary material for: Ionic liquid-assisted extraction of wool keratin proteins as an aid to MS identification
Source: Royal Society of Chemistry journal article supplement (doi:10.1039/c4ay01251h), 2014-01-01
Supplement: c4ay01251h5.pdf [file c4ay01251h5.pdf]

**Supplementary Table 5. Proteins and peptides identified in Ionic Liquid/(Urea/thourea) extract Fraction 2.**

| Protein   | Accession     | Mol Wgt (kDa) | Protein Score          | Range                                | m/z meas. | Peptide score | Sequence                | Modifications            |
|-----------|---------------|---------------|------------------------|--------------------------------------|-----------|---------------|-------------------------|--------------------------|
| KAP6.3    | gij 284080746 | 8.3           | 212.2                  | 36 - 50                              | 566.25    | 61.5          | R.RLGCYGYSCYGS<br>GFR.R | Carbamidomethyl:<br>4, 9 |
|           |               |               |                        | 37 - 50                              | 770.78    | 91.3          | R.LGCYGYSCYGS<br>FR.R   | Carbamidomethyl:<br>3, 8 |
| K86-like  | gij 312283584 | 53.2          | 5935.9                 | 34 - 39                              | 378.16    | 25.6          | R.GISCYR.G              | Carbamidomethyl:<br>4    |
|           |               |               |                        | 117 - 123                            | 406.22    | 56.2          | R.FAAFIDK.V             |                          |
|           |               |               |                        | 408 - 417                            | 414.92    | 32.3          | R.RLLEGEEQRL.C          |                          |
|           |               |               |                        | 40 - 48                              | 426.2     | 57.6          | R.GLTGGFGSR.S           |                          |
|           |               |               |                        | 192 - 201                            | 436.26    | 47.2          | K.KRYEEIAR.A            |                          |
|           |               |               |                        | 476 - 484                            | 445.77    | 98.2          | R.VGGSILGCK.K           | Carbamidomethyl:<br>8    |
|           |               |               |                        | 126 - 132                            | 453.7     | 36.2          | R.FLEQQNK.L             |                          |
|           |               |               |                        | 317 - 327                            | 468.26    | 27            | R.RTKEEINELNR.V         | Deamidated: 7            |
|           |               |               |                        | 397 - 408                            | 473.95    | 71            | K.LGLDIEIATYRR.L        |                          |
|           |               |               |                        | 242 - 248                            | 476.25    | 56.3          | R.LYEEIAR.V             |                          |
|           |               |               |                        | 138 - 144                            | 484.72    | 45.6          | K.LQFYQNR.Q             |                          |
|           |               |               |                        | 138 - 144                            | 485.26    | 47            | K.LQFYQNR.Q             | Deamidated: 6            |
|           |               |               |                        | 409 - 416                            | 487.22    | 73.6          | R.LLEGEEQR.L            |                          |
|           |               |               |                        | 332 - 340                            | 487.74    | 51.9          | R.LTAEVENAK.C           |                          |
|           |               |               |                        | 39 - 48                              | 504.25    | 44.3          | Y.RGLTGGFGSR.S          |                          |
|           |               |               |                        | 320 - 331                            | 504.94    | 42.2          | K.EEINELNRVIQR.L        |                          |
|           |               |               |                        | 291 - 298                            | 506.23    | 60.9          | R.AEAESWYR.S            |                          |
| 214 - 221 | 506.27        | 43            | K.DVDCAYLR.K           | Carbamidomethyl:<br>4                |           |               |                         |                          |
| 11 - 24   | 507.92        | 32.9          | P.AFSCVSACGPRP<br>GR.C | Carbamidomethyl:<br>4, 8             |           |               |                         |                          |
| 320 - 327 | 508.76        | 39.8          | K.EEINELNR.V           |                                      |           |               |                         |                          |
| 401 - 408 | 511.32        | 32.1          | D.IEATYRR.L            |                                      |           |               |                         |                          |
| 194 - 201 | 511.79        | 62.3          | R.YEEIAR.A             |                                      |           |               |                         |                          |
| 280 - 288 | 524.24        | 64.2          | K.AHYDDIASR.S          |                                      |           |               |                         |                          |
| 125 - 132 | 531.78        | 37            | V.RFLEQQNK.L           |                                      |           |               |                         |                          |
| 117 - 125 | 533.82        | 70            | R.FAAFIDKVR.F          |                                      |           |               |                         |                          |
| 368 - 377 | 536.32        | 87.2          | K.LAGLEEALQK.A         |                                      |           |               |                         |                          |
| 368 - 377 | 536.84        | 50.2          | K.LAGLEEALQK.A         | Deamidated: 9                        |           |               |                         |                          |
| 409 - 417 | 543.84        | 63.7          | R.LLEGEEQRL.C          |                                      |           |               |                         |                          |
| 241 - 248 | 554.31        | 57.6          | R.RLYEEIAR.V           |                                      |           |               |                         |                          |
| 25 - 33   | 556.25        | 66.8          | R.CCITAAPYR.G          | Carbamidomethyl:<br>1, 2             |           |               |                         |                          |
| 388 - 396 | 564.26        | 50.6          | K.EYQEVMSK.L           |                                      |           |               |                         |                          |
| 408 - 416 | 565.27        | 56.7          | R.RLLEGEEQR.L          |                                      |           |               |                         |                          |
| 331 - 340 | 565.8         | 31.6          | Q.RLTAEVENAK.C         |                                      |           |               |                         |                          |
| 214 - 222 | 570.28        | 26.4          | K.DVDCAYLRK.S          | Carbamidomethyl:<br>4                |           |               |                         |                          |
| 388 - 396 | 572.29        | 28.4          | K.EYQEVMSK.L           | Oxidation: 6                         |           |               |                         |                          |
| 112 - 125 | 575.67        | 30.2          | K.CLNNRFAAFIDKV<br>R.F | Carbamidomethyl:<br>1; Deamidated: 3 |           |               |                         |                          |
| 124 - 132 | 581.28        | 37.6          | K.VRFLEQQNK.L          |                                      |           |               |                         |                          |
| 318 - 331 | 581.35        | 47.6          | R.TKEEINELNRVIQR<br>.L |                                      |           |               |                         |                          |

|  |  |  |  |           |        |       |                           |                             |
|--|--|--|--|-----------|--------|-------|---------------------------|-----------------------------|
|  |  |  |  | 318 - 331 | 581.63 | 72    | R.TKEEINELNRVIQR.L        | Deamidated: 6               |
|  |  |  |  | 378 - 387 | 589.26 | 52.1  | K.AKQDMACLK.E             | Carbamidomethyl: 7          |
|  |  |  |  | 193 - 201 | 589.83 | 64.6  | K.RYEEEEIALR.A            |                             |
|  |  |  |  | 202 - 212 | 596.82 | 82    | R.ATAENEFVALK.K           |                             |
|  |  |  |  | 202 - 212 | 597.35 | 27.8  | R.ATAENEFVALK.K           | Deamidated: 5               |
|  |  |  |  | 165 - 175 | 597.73 | 82.8  | R.EAECAEADSGR.L           | Carbamidomethyl: 4          |
|  |  |  |  | 367 - 377 | 600.36 | 95    | C.KLAGLEEALQK.A           |                             |
|  |  |  |  | 273 - 288 | 605.67 | 40.6  | D.NIVAEIKAHYDDIA SR.S     |                             |
|  |  |  |  | 291 - 300 | 613.78 | 46.7  | R.AEAESWYRSK.C            |                             |
|  |  |  |  | 318 - 327 | 623.32 | 76.9  | R.TKEEINELNR.V            |                             |
|  |  |  |  | 403 - 407 | 623.41 | 26.5  | E.IATYR.R                 |                             |
|  |  |  |  | 318 - 327 | 623.82 | 62.6  | R.TKEEINELNR.V            | Deamidated: 6               |
|  |  |  |  | 289 - 298 | 627.78 | 75.5  | R.SRAEAESWYR.S            |                             |
|  |  |  |  | 269 - 279 | 630.38 | 71.5  | D.LNMDNIVAEIK.A           |                             |
|  |  |  |  | 397 - 407 | 632.41 | 104.4 | K.LGLDIEIATYR.R           |                             |
|  |  |  |  | 368 - 379 | 635.89 | 71.2  | K.LAGLEEALQKAK.Q          |                             |
|  |  |  |  | 280 - 290 | 645.78 | 57.7  | K.AHYDDIASRSR.A           |                             |
|  |  |  |  | 153 - 163 | 648.37 | 79.5  | E.PLFSGYIETLR.R           |                             |
|  |  |  |  | 202 - 213 | 660.87 | 90.2  | R.ATAENEFVALKK.D          |                             |
|  |  |  |  | 202 - 213 | 661.38 | 76.4  | R.ATAENEFVALKK.D          | Deamidated: 5               |
|  |  |  |  | 366 - 377 | 680.39 | 86.6  | K.CKLAGLEEALQK.A          | Carbamidomethyl: 1          |
|  |  |  |  | 268 - 279 | 687.91 | 96.8  | R.DLNMDNIVAEIK.A          |                             |
|  |  |  |  | 268 - 279 | 688.38 | 36.2  | R.DLNMDNIVAEIK.A          | Deamidated: 3               |
|  |  |  |  | 268 - 279 | 695.85 | 73.7  | R.DLNMDNIVAEIK.A          | Oxidation: 4                |
|  |  |  |  | 268 - 279 | 696.38 | 26.3  | R.DLNMDNIVAEIK.A          | Oxidation: 4; Deamidated: 3 |
|  |  |  |  | 176 - 193 | 698.39 | 35.1  | R.LSSELNSLQEVLE GYKKR.Y   |                             |
|  |  |  |  | 317 - 327 | 701.36 | 74.6  | R.RTKEEINELNR.V           |                             |
|  |  |  |  | 249 - 267 | 705.05 | 72.3  | R.VLQAHISDTSVIVK MDNSR.D  |                             |
|  |  |  |  | 176 - 188 | 730.82 | 25.7  | R.LSSELNSLQEVLE.G         |                             |
|  |  |  |  | 328 - 340 | 735.89 | 71    | R.VIQRLTAEVENAK.C         |                             |
|  |  |  |  | 8 - 21    | 739.82 | 81.5  | R.AVPAFSCVSACG PR.P       | Carbamidomethyl: 7, 11      |
|  |  |  |  | 223 - 241 | 740.43 | 52.6  | K.SDLEANVEALIQE TDFLRR.L  |                             |
|  |  |  |  | 126 - 137 | 745.88 | 65.7  | R.FLEQQNKLLET.K.L         |                             |
|  |  |  |  | 126 - 137 | 746.4  | 62.4  | R.FLEQQNKLLET.K.L         | Deamidated: 6               |
|  |  |  |  | 249 - 262 | 755.41 | 98.8  | R.VLQAHISDTSVIVK .M       |                             |
|  |  |  |  | 368 - 381 | 757.39 | 52.2  | K.LAGLEEALQKAKQ D.M       |                             |
|  |  |  |  | 133 - 144 | 776.9  | 81.8  | K.LLETKLQFYQNR.Q          |                             |
|  |  |  |  | 133 - 144 | 777.37 | 70.1  | K.LLETKLQFYQNR.Q          | Deamidated: 7               |
|  |  |  |  | 222 - 241 | 783.1  | 78.2  | R.KSDLEANVEALIQ ETDFLRR.L |                             |
|  |  |  |  | 222 - 241 | 783.45 | 46.9  | R.KSDLEANVEALIQ ETDFLRR.L | Deamidated: 13              |

|      |              |      |        |           |         |       |                                  |                                            |
|------|--------------|------|--------|-----------|---------|-------|----------------------------------|--------------------------------------------|
|      |              |      |        | 126 - 144 | 814.09  | 74.5  | R.FLEQQNKLETKL<br>QFYQNR.Q       |                                            |
|      |              |      |        | 242 - 262 | 814.75  | 41.6  | R.LYEEEIRVLQAHIS<br>DTSVIVK.M    |                                            |
|      |              |      |        | 145 - 164 | 825.07  | 32.4  | R.QCCESNLEPLFSG<br>YIETLRR.E     | Carbamidomethyl:<br>2, 3; Deamidated:<br>1 |
|      |              |      |        | 202 - 216 | 825.42  | 55.2  | R.ATAENEFVALKKD<br>VD.C          |                                            |
|      |              |      |        | 388 - 408 | 843.78  | 33.8  | K.EYQEVMSKLG<br>L<br>DIEIATYRR.L | Deamidated: 3                              |
|      |              |      |        | 417 - 432 | 847.39  | 132.1 | R.LCEGVGAVNVCV<br>SSSR.G         | Carbamidomethyl:<br>2, 11                  |
|      |              |      |        | 176 - 191 | 904.97  | 119.5 | R.LSSELNSLQEVLE<br>GYK.K         |                                            |
|      |              |      |        | 176 - 191 | 905.45  | 75.1  | R.LSSELNSLQEVLE<br>GYK.K         | Deamidated: 6                              |
|      |              |      |        | 148 - 163 | 934.54  | 47.8  | C.ESNLEPLFSGYIET<br>LR.R         |                                            |
|      |              |      |        | 176 - 192 | 968.99  | 67.3  | R.LSSELNSLQEVLE<br>GYKK.R        |                                            |
|      |              |      |        | 346 - 365 | 1007.51 | 131.4 | K.LEAAVTQAEQQG<br>EAALADAK.C     |                                            |
|      |              |      |        | 223 - 240 | 1032.04 | 120.7 | K.SDLEANVEALIQE<br>TDFLR.R       |                                            |
|      |              |      |        | 222 - 240 | 1096.04 | 106.2 | R.KSDLEANVEALIQ<br>ETDFLR.R      |                                            |
| K33b | gij999000003 | 45.9 | 7004.8 | 241 - 246 | 366.15  | 49.8  | R.VLNETR.A                       |                                            |
|      |              |      |        | 241 - 246 | 366.71  | 34    | R.VLNETR.A                       | Deamidated: 3                              |
|      |              |      |        | 25 - 30   | 367.25  | 36.7  | L.PNLSFR.S                       |                                            |
|      |              |      |        | 153 - 159 | 404.19  | 58.2  | K.LAADDFR.T                      |                                            |
|      |              |      |        | 234 - 240 | 407.73  | 44    | A.PTVDLNR.V                      |                                            |
|      |              |      |        | 84 - 90   | 412.26  | 59.2  | R.LASYLEK.V                      |                                            |
|      |              |      |        | 24 - 30   | 423.77  | 40.4  | C.LPNLSFR.S                      |                                            |
|      |              |      |        | 267 - 273 | 431.23  | 28.2  | R.QTEELNK.Q                      |                                            |
|      |              |      |        | 304 - 310 | 434.2   | 26.6  | L.QAQHNL.R.D                     | Deamidated: 5                              |
|      |              |      |        | 136 - 143 | 437.16  | 40.2  | L.ANKAENAR.L                     |                                            |
|      |              |      |        | 136 - 143 | 437.71  | 50.4  | L.ANKAENAR.L                     | Deamidated: 2                              |
|      |              |      |        | 240 - 246 | 444.19  | 35.8  | N.RVLNETR.A                      |                                            |
|      |              |      |        | 170 - 181 | 467.25  | 49    | R.QLVESDINGLRR.I                 |                                            |
|      |              |      |        | 170 - 181 | 467.6   | 45.1  | R.QLVESDINGLRR.I                 | Deamidated: 8                              |
|      |              |      |        | 97 - 104  | 474.22  | 51.4  | R.ENAELESR.I                     |                                            |
|      |              |      |        | 247 - 258 | 483.92  | 67.4  | R.AQYEALVETNRR.<br>D             |                                            |
|      |              |      |        | 247 - 258 | 484.24  | 62.8  | R.AQYEALVETNRR.<br>D             | Deamidated: 10                             |
|      |              |      |        | 162 - 169 | 490.32  | 56.8  | K.YQTELGLR.Q                     |                                            |
|      |              |      |        | 162 - 169 | 490.76  | 56.6  | K.YQTELGLR.Q                     | Deamidated: 2                              |
|      |              |      |        | 135 - 143 | 493.8   | 44.5  | I.LANKAENAR.L                    |                                            |
|      |              |      |        | 126 - 133 | 494.75  | 65.7  | R.TIEELQQK.I                     |                                            |
|      |              |      |        | 260 - 266 | 497.78  | 53.5  | D.VEEWYIR.Q                      |                                            |
|      |              |      |        | 208 - 219 | 499.22  | 32.6  | L.KQNHEQEVNTLR.<br>S             |                                            |
|      |              |      |        | 414 - 422 | 500.21  | 37.6  | R.FGPCNTSGC.-                    | Carbamidomethyl:<br>4, 9                   |
|      |              |      |        | 144 - 152 | 500.33  | 75.6  | R.LVVQIDNAK.L                    |                                            |
|      |              |      |        | 144 - 152 | 500.81  | 60.4  | R.LVVQIDNAK.L                    | Deamidated: 7                              |
|      |              |      |        | 144 - 152 | 500.84  | 51.4  | R.LVVQIDNAK.L                    | Deamidated: 4                              |
|      |              |      |        | 23 - 30   | 503.79  | 55.7  | F.CLPNLSFR.S                     | Carbamidomethyl:<br>1                      |

|  |  |  |  |           |        |      |                        |                                       |
|--|--|--|--|-----------|--------|------|------------------------|---------------------------------------|
|  |  |  |  | 153 - 161 | 518.77 | 51.3 | K.LAADDFRTK.Y          |                                       |
|  |  |  |  | 78 - 90   | 532.99 | 35.7 | M.QFLNDRLASYLEK.V      |                                       |
|  |  |  |  | 207 - 219 | 536.94 | 62   | C.LKQNHQEVENL.R.S      |                                       |
|  |  |  |  | 118 - 125 | 537.8  | 63.7 | C.PNYQSYFR.T           |                                       |
|  |  |  |  | 84 - 92   | 539.81 | 79.8 | R.LASYLEKVR.Q          |                                       |
|  |  |  |  | 412 - 421 | 541.74 | 42.7 | R.SRFGPCNTSG.C         | Carbamidomethyl: 6                    |
|  |  |  |  | 134 - 143 | 550.25 | 71   | K.ILANKAENAR.L         |                                       |
|  |  |  |  | 134 - 143 | 550.8  | 76.4 | K.ILANKAENAR.L         | Deamidated: 4                         |
|  |  |  |  | 182 - 190 | 552.86 | 72.8 | R.ILDELTLCK.S          | Carbamidomethyl: 8                    |
|  |  |  |  | 259 - 266 | 555.31 | 65.2 | R.DVEEWYIR.Q           |                                       |
|  |  |  |  | 232 - 246 | 557.34 | 34.9 | D.AAPTVDLNRVLNE.TR.A   | Deamidated: 8                         |
|  |  |  |  | 238 - 246 | 557.81 | 36.7 | D.LNRVLNETR.A          |                                       |
|  |  |  |  | 366 - 374 | 562.76 | 65.1 | R.LESEINTYR.G          |                                       |
|  |  |  |  | 211 - 219 | 563.26 | 58   | N.HEQEVNLR.S           |                                       |
|  |  |  |  | 125 - 133 | 572.81 | 31.4 | F.RTIEELQQK.I          |                                       |
|  |  |  |  | 91 - 104  | 576.96 | 48   | K.VRQLERENAELES.R.I    |                                       |
|  |  |  |  | 75 - 83   | 577.31 | 55.8 | K.ETMQFLNDR.L          |                                       |
|  |  |  |  | 22 - 30   | 577.34 | 40.8 | N.FCLPNLSFR.S          | Carbamidomethyl: 2                    |
|  |  |  |  | 352 - 365 | 578    | 44.8 | R.QNQEYQVLLDVR.AR.L    |                                       |
|  |  |  |  | 143 - 152 | 578.29 | 65.7 | A.RLVVQIDNAK.L         |                                       |
|  |  |  |  | 75 - 83   | 585.26 | 43.2 | K.ETMQFLNDR.L          | Oxidation: 3                          |
|  |  |  |  | 375 - 385 | 594.37 | 26.7 | R.GLLDSEDTKLP.C        |                                       |
|  |  |  |  | 225 - 240 | 595.03 | 30.4 | D.RLNVEVDAAPTVD.LNR.V  | Deamidated: 15                        |
|  |  |  |  | 301 - 310 | 604.32 | 62.1 | E.VELQAQHNL.R.D        |                                       |
|  |  |  |  | 160 - 169 | 604.86 | 61.8 | R.TKYQTELGLR.Q         |                                       |
|  |  |  |  | 160 - 169 | 605.37 | 68.6 | R.TKYQTELGLR.Q         | Deamidated: 4                         |
|  |  |  |  | 126 - 135 | 607.91 | 45.3 | R.TIEELQQKIL.A         |                                       |
|  |  |  |  | 412 - 422 | 621.78 | 76.2 | R.SRFGPCNTSGC.-        | Carbamidomethyl: 6, 11                |
|  |  |  |  | 412 - 422 | 622.25 | 84.2 | R.SRFGPCNTSGC.-        | Carbamidomethyl: 6, 11; Deamidated: 7 |
|  |  |  |  | 170 - 180 | 622.36 | 37.8 | R.QLVESDINGLR.R        |                                       |
|  |  |  |  | 170 - 180 | 622.83 | 62.7 | R.QLVESDINGLR.R        | Deamidated: 8                         |
|  |  |  |  | 181 - 190 | 630.86 | 48.8 | R.RILDELTLCK.S         | Carbamidomethyl: 9                    |
|  |  |  |  | 258 - 266 | 633.34 | 53.4 | R.RDVEEWYIR.Q          |                                       |
|  |  |  |  | 21 - 30   | 634.36 | 28   | Y.NFCLPNLSFR.S         | Carbamidomethyl: 3                    |
|  |  |  |  | 365 - 374 | 640.79 | 36.6 | A.RLESEINTYR.G         |                                       |
|  |  |  |  | 247 - 257 | 647.34 | 94.9 | R.AQYEALVETNR.R        |                                       |
|  |  |  |  | 247 - 257 | 647.85 | 79.2 | R.AQYEALVETNR.R        | Deamidated: 2                         |
|  |  |  |  | 259 - 273 | 651.34 | 43   | R.DVEEWYIRQTEEL.NK.Q   |                                       |
|  |  |  |  | 75 - 90   | 653.36 | 52.6 | K.ETMQFLNDRLASYLEK.V   |                                       |
|  |  |  |  | 294 - 310 | 664.36 | 92.1 | R.RTVNALEVELQAQ.HNLR.D |                                       |
|  |  |  |  | 294 - 310 | 664.7  | 60.2 | R.RTVNALEVELQAQ.HNLR.D | Deamidated: 4                         |

|  |  |  |  |           |        |       |                                |                        |
|--|--|--|--|-----------|--------|-------|--------------------------------|------------------------|
|  |  |  |  | 153 - 169 | 666.37 | 44.2  | K.LAADDFRTKYQTE<br>LGLR.Q      |                        |
|  |  |  |  | 153 - 169 | 666.71 | 58.5  | K.LAADDFRTKYQTE<br>LGLR.Q      | Deamidated: 11         |
|  |  |  |  | 307 - 323 | 667.32 | 33.3  | Q.HNLRDSLENTLTE<br>TEAR.Y      | Deamidated: 2          |
|  |  |  |  | 220 - 231 | 672.83 | 73.9  | R.SQLGDRLNVEVD.<br>A           |                        |
|  |  |  |  | 364 - 374 | 676.39 | 82    | R.ARLESEINTYR.G                |                        |
|  |  |  |  | 364 - 374 | 676.84 | 69.6  | R.ARLESEINTYR.G                | Deamidated: 8          |
|  |  |  |  | 312 - 323 | 682.35 | 92.2  | D.SLENTLTETEAR.Y               |                        |
|  |  |  |  | 312 - 323 | 682.83 | 93.4  | D.SLENTLTETEAR.Y               | Deamidated: 4          |
|  |  |  |  | 209 - 219 | 684.3  | 67.9  | K.QNHEQEVNTRLR.S               |                        |
|  |  |  |  | 209 - 219 | 684.84 | 40    | K.QNHEQEVNTRLR.S               | Deamidated: 1          |
|  |  |  |  | 209 - 219 | 685.8  | 40.8  | K.QNHEQEVNTRLR.S               | Deamidated: 1, 2,<br>5 |
|  |  |  |  | 191 - 208 | 702.06 | 43.3  | K.SDLEAQVESLKEE<br>LICK.Q      | Carbamidomethyl:<br>16 |
|  |  |  |  | 347 - 363 | 702.39 | 63.1  | R.SDLERQNQEYQV<br>LLDVR.A      |                        |
|  |  |  |  | 241 - 258 | 721.34 | 43    | R.VLNETRAQYEALV<br>ETNRR.D     |                        |
|  |  |  |  | 241 - 258 | 721.68 | 40.6  | R.VLNETRAQYEALV<br>ETNRR.D     | Deamidated: 8          |
|  |  |  |  | 197 - 208 | 730.9  | 71.8  | Q.VESLKEELICK.Q                | Carbamidomethyl:<br>10 |
|  |  |  |  | 93 - 104  | 737.34 | 39    | R.QLERENAELESR.I               |                        |
|  |  |  |  | 93 - 104  | 737.85 | 28    | R.QLERENAELESR.I               | Deamidated: 1          |
|  |  |  |  | 75 - 92   | 738.38 | 25.2  | K.ETMQFLNDRLAS<br>LEKVR.Q      |                        |
|  |  |  |  | 311 - 323 | 739.83 | 110.7 | R.DSLENTLTETEAR.<br>Y          |                        |
|  |  |  |  | 311 - 323 | 740.33 | 93.4  | R.DSLENTLTETEAR.<br>Y          | Deamidated: 5          |
|  |  |  |  | 75 - 92   | 743.7  | 47.6  | K.ETMQFLNDRLAS<br>LEKVR.Q      | Oxidation: 3           |
|  |  |  |  | 191 - 209 | 744.75 | 35.6  | K.SDLEAQVESLKEE<br>LICK.Q.N    | Carbamidomethyl:<br>16 |
|  |  |  |  | 352 - 363 | 752.9  | 100.1 | R.QNQEYQVLLDVR.<br>A           |                        |
|  |  |  |  | 352 - 363 | 753.43 | 73    | R.QNQEYQVLLDVR.<br>A           | Deamidated: 3          |
|  |  |  |  | 298 - 310 | 760.89 | 94.7  | N.ALEVELQAQHNL<br>.D           |                        |
|  |  |  |  | 226 - 246 | 780.11 | 43    | R.LNVEVDAAPTVDL<br>NRVLNETR.A  |                        |
|  |  |  |  | 226 - 240 | 813.41 | 98.2  | R.LNVEVDAAPTVDL<br>NR.V        |                        |
|  |  |  |  | 225 - 246 | 832.13 | 25.7  | D.RLNVEVDAAPTVD<br>LNRVLNETR.A |                        |
|  |  |  |  | 232 - 246 | 834.96 | 43.2  | D.AAPTVDLNRVLNE<br>TR.A        |                        |
|  |  |  |  | 191 - 205 | 851.94 | 35.2  | K.SDLEAQVESLKEE<br>LI.C        |                        |
|  |  |  |  | 91 - 104  | 865.4  | 60.8  | K.VRQLERENAELES<br>R.I         | Deamidated: 3          |
|  |  |  |  | 225 - 240 | 891.46 | 91.2  | D.RLNVEVDAAPTVD<br>LNR.V       |                        |
|  |  |  |  | 76 - 90   | 914.97 | 58.9  | E.TMQFLNDRLAS<br>YLEK.V        |                        |
|  |  |  |  | 295 - 310 | 917.99 | 134.1 | R.TVNALEVELQAQH<br>NLR.D       |                        |
|  |  |  |  | 295 - 310 | 918.47 | 105.8 | R.TVNALEVELQAQH                | Deamidated: 10         |

|     |              |      |        |           |         |       |                                             |                                       |
|-----|--------------|------|--------|-----------|---------|-------|---------------------------------------------|---------------------------------------|
|     |              |      |        |           |         |       | NLR.D                                       |                                       |
|     |              |      |        | 295 - 310 | 918.49  | 119.9 | R.TVNALEVELQAQH<br>NLR.D                    | Deamidated: 3                         |
|     |              |      |        | 295 - 311 | 975.48  | 70.7  | R.TVNALEVELQAQH<br>NLRD.S                   |                                       |
|     |              |      |        | 75 - 90   | 980.04  | 40.1  | K.ETMQFLNDRASY<br>LEK.V                     | Deamidated: 4                         |
|     |              |      |        | 191 - 208 | 1053.05 | 41.7  | K.SDLEAQVESLKEE<br>LICKL.Q                  | Carbamidomethyl:<br>16; Deamidated: 6 |
|     |              |      |        | 109 - 125 | 1072.49 | 72    | R.SQQQEPLVCPNY<br>QSYFR.T                   | Carbamidomethyl:<br>9                 |
|     |              |      |        | 295 - 323 | 1099.18 | 29.1  | R.TVNALEVELQAQH<br>NLRDSLENTLTETEA<br>R.Y   | Deamidated: 14                        |
|     |              |      |        | 220 - 240 | 1141.57 | 90.9  | R.SQLGDRLNVEVD<br>AAPTVDLNR.V               |                                       |
|     |              |      |        | 220 - 240 | 1142.07 | 38.4  | R.SQLGDRLNVEVD<br>AAPTVDLNR.V               | Deamidated: 2                         |
| K35 | gj 999000005 | 49.7 | 2400.5 | 176 - 182 | 404.19  | 58.2  | K.LAADDFR.T                                 |                                       |
|     |              |      |        | 107 - 113 | 412.26  | 59.2  | R.LASYLEK.V                                 |                                       |
|     |              |      |        | 120 - 127 | 474.22  | 51.4  | R.ENAELESR.I                                |                                       |
|     |              |      |        | 149 - 156 | 494.75  | 65.7  | Q.TIEELQKK.I                                |                                       |
|     |              |      |        | 167 - 175 | 500.33  | 75.6  | R.LVVQIDNAK.L                               |                                       |
|     |              |      |        | 167 - 175 | 500.81  | 60.4  | R.LVVQIDNAK.L                               | Deamidated: 7                         |
|     |              |      |        | 167 - 175 | 500.84  | 51.4  | R.LVVQIDNAK.L                               | Deamidated: 4                         |
|     |              |      |        | 185 - 192 | 514.77  | 25.9  | K.YETEVTMR.Q                                |                                       |
|     |              |      |        | 176 - 184 | 518.77  | 51.3  | K.LAADDFRTK.Y                               |                                       |
|     |              |      |        | 101 - 113 | 532.99  | 35.7  | M.QFLNDRLASYLEK<br>.V                       |                                       |
|     |              |      |        | 107 - 115 | 539.81  | 79.8  | R.LASYLEKVR.Q                               |                                       |
|     |              |      |        | 47 - 57   | 556.77  | 53    | R.SFSACSVGLGK.S<br>K.VRQLERENAELES<br>R.I   | Carbamidomethyl:<br>5                 |
|     |              |      |        | 114 - 127 | 576.96  | 48    |                                             |                                       |
|     |              |      |        | 98 - 106  | 577.31  | 55.8  | K.ETMQFLNDR.L<br>R.QNQEYQVLLDVR<br>AR.L     |                                       |
|     |              |      |        | 375 - 388 | 578     | 44.8  |                                             |                                       |
|     |              |      |        | 166 - 175 | 578.29  | 65.7  | A.RLVVQIDNAK.L                              |                                       |
|     |              |      |        | 7 - 26    | 584     | 75.6  | K.ASFSSGSLKVPGG<br>AGGGSAR.V                |                                       |
|     |              |      |        | 98 - 106  | 585.26  | 43.2  | K.ETMQFLNDR.L                               | Oxidation: 3                          |
|     |              |      |        | 27 - 37   | 601.77  | 39.5  | R.VSTIFSSSSCK.L                             | Carbamidomethyl:<br>10                |
|     |              |      |        | 233 - 242 | 613.77  | 35.6  | K.NHEEEVNSLR.C                              |                                       |
|     |              |      |        | 183 - 192 | 637.28  | 34.3  | R.TKYETEVTMR.Q                              | Oxidation: 9                          |
|     |              |      |        | 335 - 346 | 645.83  | 98.6  | D.ALESTLAETEAR.Y<br>K.ETMQFLNDRASY<br>LEK.V |                                       |
|     |              |      |        | 98 - 113  | 653.36  | 52.6  |                                             |                                       |
|     |              |      |        | 387 - 397 | 699.3   | 42    | R.ARLECEISTYR.G<br>R.DALESTLAETEAR.<br>Y    | Carbamidomethyl:<br>5                 |
|     |              |      |        | 334 - 346 | 703.35  | 90.2  |                                             |                                       |
|     |              |      |        | 220 - 231 | 730.9   | 71.8  | Q.VESLKEELLCLK.K                            | Carbamidomethyl:<br>10                |
|     |              |      |        | 116 - 127 | 737.34  | 39    | R.QLERENAELESR.I                            |                                       |
|     |              |      |        | 116 - 127 | 737.85  | 28    | R.QLERENAELESR.I                            | Deamidated: 1                         |
|     |              |      |        | 98 - 115  | 738.38  | 25.2  | K.ETMQFLNDRASY<br>LEKVR.Q                   |                                       |
|     |              |      |        | 98 - 115  | 743.7   | 47.6  | K.ETMQFLNDRASY<br>LEKVR.Q                   | Oxidation: 3                          |

|     |              |      |  |           |        |       |                                 |                                              |
|-----|--------------|------|--|-----------|--------|-------|---------------------------------|----------------------------------------------|
|     |              |      |  | 375 - 386 | 752.9  | 100.1 | R.QNQEYQVLLDVR.<br>A            |                                              |
|     |              |      |  | 375 - 386 | 753.43 | 73    | R.QNQEYQVLLDVR.<br>A            | Deamidated: 3                                |
|     |              |      |  | 249 - 263 | 811.41 | 26.4  | R.LNVEVDAAPPVDL<br>NR.V         |                                              |
|     |              |      |  | 296 - 317 | 864.41 | 41.4  | N.QQVVSSEQLQS<br>YQAEIILRR.T    |                                              |
|     |              |      |  | 114 - 127 | 865.4  | 60.8  | K.VRQLERENAELES<br>R.I          | Deamidated: 3                                |
|     |              |      |  | 346 - 369 | 904.43 | 34.8  | A.RYSSQLAQMQLI<br>GNVESQLAEIR.C | Oxidation: 9;<br>Deamidated: 5, 8,<br>10, 15 |
|     |              |      |  | 99 - 113  | 914.97 | 58.9  | E.TMQFLNDRLASYL<br>EK.V         |                                              |
|     |              |      |  | 98 - 113  | 980.04 | 40.1  | K.ETMQFLNDRLASYL<br>LEK.V       | Deamidated: 4                                |
| K81 | gj 999000007 | 55.1 |  | 33 - 38   | 378.16 | 25.6  | R.GISCYR.G                      | Carbamidomethyl:<br>4                        |
|     |              |      |  | 116 - 122 | 406.22 | 56.2  | R.FAAFIDK.V                     |                                              |
|     |              |      |  | 408 - 417 | 414.92 | 32.3  | R.RLLEGQEQL.C                   | Deamidated: 6                                |
|     |              |      |  | 39 - 47   | 426.2  | 57.6  | R.GLTGGFGSR.S                   |                                              |
|     |              |      |  | 192 - 201 | 440.94 | 34.1  | K.RRYEEVALR.A                   |                                              |
|     |              |      |  | 125 - 131 | 453.7  | 36.2  | R.FLEQQNK.L                     |                                              |
|     |              |      |  | 317 - 327 | 468.26 | 27    | R.RTKEEINELNR.V                 | Deamidated: 7                                |
|     |              |      |  | 397 - 408 | 473.95 | 71    | K.LGLDIEIATYRR.L                |                                              |
|     |              |      |  | 242 - 248 | 476.25 | 56.3  | R.LYEEEEIR.V                    |                                              |
|     |              |      |  | 137 - 143 | 484.72 | 45.6  | K.LQFYQNR.Q                     |                                              |
|     |              |      |  | 137 - 143 | 485.26 | 47    | K.LQFYQNR.Q                     | Deamidated: 6                                |
|     |              |      |  | 409 - 416 | 487.22 | 73.6  | R.LLEGQEQR.L                    | Deamidated: 5                                |
|     |              |      |  | 332 - 340 | 487.74 | 51.9  | R.LTAEVENAK.C                   |                                              |
|     |              |      |  | 38 - 47   | 504.25 | 44.3  | Y.RGLTGGFGSR.S                  |                                              |
|     |              |      |  | 194 - 201 | 504.77 | 61.9  | R.YEEVALR.A                     |                                              |
|     |              |      |  | 320 - 331 | 504.94 | 42.2  | K.EEINELNRVIQR.L                |                                              |
|     |              |      |  | 291 - 298 | 506.23 | 60.9  | R.AEAESWYR.S                    |                                              |
|     |              |      |  | 214 - 221 | 506.27 | 43    | K.DVDCAYLR.K                    | Carbamidomethyl:<br>4                        |
|     |              |      |  | 10 - 23   | 507.92 | 32.9  | R.AFSCVSACGPRP<br>GR.C          | Carbamidomethyl:<br>4, 8                     |
|     |              |      |  | 320 - 327 | 508.76 | 39.8  | K.EEINELNR.V                    |                                              |
|     |              |      |  | 401 - 408 | 511.32 | 32.1  | D.IEATYRR.L                     |                                              |
|     |              |      |  | 280 - 288 | 519.76 | 74.8  | K.AQYDDIASR.S                   |                                              |
|     |              |      |  | 124 - 131 | 531.78 | 37    | V.RFLEQQNK.L                    |                                              |
|     |              |      |  | 116 - 124 | 533.82 | 70    | R.FAAFIDKVR.F                   |                                              |
|     |              |      |  | 368 - 377 | 536.32 | 87.2  | K.LAGLEEALQK.A                  |                                              |
|     |              |      |  | 368 - 377 | 536.84 | 50.2  | K.LAGLEEALQK.A                  | Deamidated: 9                                |
|     |              |      |  | 409 - 417 | 543.84 | 63.7  | R.LLEGQEQL.C                    | Deamidated: 5                                |
|     |              |      |  | 241 - 248 | 554.31 | 57.6  | R.RLYEEEEIR.V                   |                                              |
|     |              |      |  | 24 - 32   | 556.25 | 66.8  | R.CCITAAPYR.G                   | Carbamidomethyl:<br>1, 2                     |
|     |              |      |  | 388 - 396 | 564.26 | 50.6  | K.EYQEVMSK.L                    |                                              |
|     |              |      |  | 408 - 416 | 565.27 | 56.7  | R.RLLEGQEQR.L                   | Deamidated: 6                                |
|     |              |      |  | 331 - 340 | 565.8  | 31.6  | Q.RLTAEVENAK.C                  |                                              |
|     |              |      |  | 214 - 222 | 570.28 | 26.4  | K.DVDCAYLRK.S                   | Carbamidomethyl:<br>4                        |
|     |              |      |  | 388 - 396 | 572.29 | 28.4  | K.EYQEVMSK.L                    | Oxidation: 6                                 |
|     |              |      |  | 111 - 124 | 575.67 | 30.2  | K.CLNNRFAAFIDKV<br>R.F          | Carbamidomethyl:<br>1; Deamidated: 3         |

|  |  |  |  |           |        |       |                            |                             |
|--|--|--|--|-----------|--------|-------|----------------------------|-----------------------------|
|  |  |  |  | 123 - 131 | 581.28 | 37.6  | K.VRFLEQQNK.L              |                             |
|  |  |  |  | 318 - 331 | 581.35 | 47.6  | R.TKEEINELNRVIQR.L         |                             |
|  |  |  |  | 318 - 331 | 581.63 | 72    | R.TKEEINELNRVIQR.L         | Deamidated: 6               |
|  |  |  |  | 193 - 201 | 582.79 | 61.7  | R.RYEEEEVALR.A             |                             |
|  |  |  |  | 378 - 387 | 589.26 | 52.1  | K.AKQDMACLLK.E             | Carbamidomethyl: 7          |
|  |  |  |  | 202 - 212 | 596.82 | 82    | R.ATAENEFVALK.K            |                             |
|  |  |  |  | 202 - 212 | 597.35 | 27.8  | R.ATAENEFVALK.K            | Deamidated: 5               |
|  |  |  |  | 164 - 174 | 597.73 | 82.8  | R.EAECAEADSGR.L            | Carbamidomethyl: 4          |
|  |  |  |  | 367 - 377 | 600.36 | 95    | R.KLAGLEEALQK.A            |                             |
|  |  |  |  | 10 - 20   | 606.22 | 49.8  | R.AFSCVSACGPR.P            | Carbamidomethyl: 4, 8       |
|  |  |  |  | 291 - 300 | 613.78 | 46.7  | R.AEAESWYRSK.C             |                             |
|  |  |  |  | 318 - 327 | 623.32 | 76.9  | R.TKEEINELNR.V             |                             |
|  |  |  |  | 403 - 407 | 623.41 | 26.5  | E.IATYR.R                  |                             |
|  |  |  |  | 318 - 327 | 623.82 | 62.6  | R.TKEEINELNR.V             | Deamidated: 6               |
|  |  |  |  | 289 - 298 | 627.78 | 75.5  | R.SRAEAESWYR.S             |                             |
|  |  |  |  | 269 - 279 | 630.38 | 71.5  | D.LNMDNIVAEIK.A            |                             |
|  |  |  |  | 397 - 407 | 632.41 | 104.4 | K.LGLDIEIATYR.R            |                             |
|  |  |  |  | 368 - 379 | 635.89 | 71.2  | K.LAGLEEALQKAK.Q           |                             |
|  |  |  |  | 280 - 290 | 641.3  | 56.1  | K.AQYDDIASRSR.A            |                             |
|  |  |  |  | 152 - 162 | 648.37 | 79.5  | E.PLFSGYIETLR.R            |                             |
|  |  |  |  | 202 - 213 | 660.87 | 90.2  | R.ATAENEFVALKK.D           |                             |
|  |  |  |  | 202 - 213 | 661.38 | 76.4  | R.ATAENEFVALKK.D           | Deamidated: 5               |
|  |  |  |  | 366 - 377 | 678.41 | 70.7  | K.RKLAGLEEALQK.A           |                             |
|  |  |  |  | 268 - 279 | 687.91 | 96.8  | R.DLNMDNIVAEIK.A           |                             |
|  |  |  |  | 268 - 279 | 688.38 | 36.2  | R.DLNMDNIVAEIK.A           | Deamidated: 3               |
|  |  |  |  | 268 - 279 | 695.85 | 73.7  | R.DLNMDNIVAEIK.A           | Oxidation: 4                |
|  |  |  |  | 268 - 279 | 696.38 | 26.3  | R.DLNMDNIVAEIK.A           | Oxidation: 4; Deamidated: 3 |
|  |  |  |  | 175 - 192 | 698.39 | 35.1  | R.LSSELNSLQEVLE.GYKKR.R    |                             |
|  |  |  |  | 317 - 327 | 701.36 | 74.6  | R.RTKEEINELNR.V            |                             |
|  |  |  |  | 249 - 267 | 705.05 | 72.3  | R.VLQAHISDTSVIVK.MDNSR.D   |                             |
|  |  |  |  | 346 - 366 | 724.08 | 71.8  | K.LEAAVTQAEQQG.EAALADAKR.K |                             |
|  |  |  |  | 346 - 366 | 724.39 | 34.2  | K.LEAAVTQAEQQG.EAALADAKR.K | Deamidated: 7               |
|  |  |  |  | 175 - 187 | 730.82 | 25.7  | R.LSSELNSLQEVLE.G          |                             |
|  |  |  |  | 328 - 340 | 735.89 | 71    | R.VIQRILTAEVENAK.C         |                             |
|  |  |  |  | 223 - 241 | 740.43 | 52.6  | K.SDLEANVEALIQE.TDFLRR.L   |                             |
|  |  |  |  | 125 - 136 | 745.88 | 65.7  | R.FLEQQNKLLET.K.L          |                             |
|  |  |  |  | 125 - 136 | 746.4  | 62.4  | R.FLEQQNKLLET.K.L          | Deamidated: 6               |
|  |  |  |  | 249 - 262 | 755.41 | 98.8  | R.VLQAHISDTSVIVK.M         |                             |
|  |  |  |  | 368 - 381 | 757.39 | 52.2  | K.LAGLEEALQKAKQ.D.M        |                             |
|  |  |  |  | 194 - 213 | 770.74 | 29    | R.YEEEEVALRATAEN.EFVALKK.D |                             |



|     |              |      |        |           |         |       |                                |                                            |
|-----|--------------|------|--------|-----------|---------|-------|--------------------------------|--------------------------------------------|
|     |              |      |        | 132 - 143 | 776.9   | 81.8  | K.LLETKLQFYQNR.Q               |                                            |
|     |              |      |        | 132 - 143 | 777.37  | 70.1  | K.LLETKLQFYQNR.Q               | Deamidated: 7                              |
|     |              |      |        | 222 - 241 | 783.1   | 78.2  | R.KSDLEANVEALIQ<br>ETDFLRR.L   |                                            |
|     |              |      |        | 222 - 241 | 783.45  | 46.9  | R.KSDLEANVEALIQ<br>ETDFLRR.L   | Deamidated: 13                             |
|     |              |      |        | 125 - 143 | 814.09  | 74.5  | R.FLEQQNKLLETKL<br>QFYQNR.Q    |                                            |
|     |              |      |        | 242 - 262 | 814.75  | 41.6  | R.LYEEEEIRVLAHIS<br>DTSVIVK.M  |                                            |
|     |              |      |        | 144 - 163 | 825.07  | 32.4  | R.QCCESNLEPLFSG<br>YIETLRR.E   | Carbamidomethyl:<br>2, 3; Deamidated:<br>1 |
|     |              |      |        | 202 - 216 | 825.42  | 55.2  | R.ATAENEFVALKKD<br>VD.C        |                                            |
|     |              |      |        | 388 - 408 | 843.78  | 33.8  | K.EYQEVMSKLG<br>LGLDIEIATYRR.L | Deamidated: 3                              |
|     |              |      |        | 417 - 432 | 855.36  | 126.5 | R.LCEGVGSVNCV<br>SSSR.G        | Carbamidomethyl:<br>2, 11                  |
|     |              |      |        | 175 - 190 | 904.97  | 119.5 | R.LSSELNSLQEVLE<br>GYK.K       |                                            |
|     |              |      |        | 175 - 190 | 905.45  | 75.1  | R.LSSELNSLQEVLE<br>GYK.K       | Deamidated: 6                              |
|     |              |      |        | 147 - 162 | 934.54  | 47.8  | C.ESNLEPLFSGYIET<br>LR.R       |                                            |
|     |              |      |        | 175 - 191 | 968.99  | 67.3  | R.LSSELNSLQEVLE<br>GYKK.R      |                                            |
|     |              |      |        | 346 - 365 | 1007.51 | 131.4 | K.LEAAVTQAEQQG<br>EAALADAK.R   |                                            |
|     |              |      |        | 223 - 240 | 1032.04 | 120.7 | K.SDLEANVEALIQE<br>TDFLR.R     |                                            |
|     |              |      |        | 222 - 240 | 1096.04 | 106.2 | R.KSDLEANVEALIQ<br>ETDFLR.R    |                                            |
| K86 | gij999000010 | 54.8 | 6183.6 | 33 - 39   | 389.21  | 25.1  | C.ISAAPYR.G                    |                                            |
|     |              |      |        | 133 - 139 | 406.22  | 56.2  | R.FAAFIDK.V                    |                                            |
|     |              |      |        | 424 - 433 | 414.92  | 32.3  | R.RLLEGEEQRL.C                 |                                            |
|     |              |      |        | 492 - 500 | 445.77  | 98.2  | R.VGGSILGCK.K                  | Carbamidomethyl:<br>8                      |
|     |              |      |        | 64 - 71   | 453.25  | 36.5  | P.RIAVSGFR.A                   |                                            |
|     |              |      |        | 142 - 148 | 453.7   | 36.2  | R.FLEQQNK.L                    |                                            |
|     |              |      |        | 333 - 343 | 468.26  | 27    | R.RTKKEINELNR.V                | Deamidated: 7                              |
|     |              |      |        | 32 - 39   | 469.26  | 44    | C.CISAAPYR.G                   | Carbamidomethyl:<br>1                      |
|     |              |      |        | 413 - 424 | 473.95  | 71    | K.LGLDIEIATYRR.L               |                                            |
|     |              |      |        | 258 - 264 | 476.25  | 56.3  | R.LYEEEEIR.V                   |                                            |
|     |              |      |        | 154 - 160 | 484.72  | 45.6  | K.LQFYQNR.Q                    |                                            |
|     |              |      |        | 154 - 160 | 485.26  | 47    | K.LQFYQNR.Q                    | Deamidated: 6                              |
|     |              |      |        | 425 - 432 | 487.22  | 73.6  | R.LLEGEEQR.L                   |                                            |
|     |              |      |        | 348 - 356 | 487.74  | 51.9  | R.LTAEVENAK.C                  |                                            |
|     |              |      |        | 7 - 15    | 490.28  | 25.7  | R.ISPGYSVTR.T                  |                                            |
|     |              |      |        | 210 - 217 | 504.77  | 61.9  | R.YEEVALR.A                    |                                            |
|     |              |      |        | 336 - 347 | 504.94  | 42.2  | K.EEINELNRVIQR.L               |                                            |
|     |              |      |        | 307 - 314 | 506.23  | 60.9  | R.AEAESWYR.S                   |                                            |
|     |              |      |        | 230 - 237 | 506.27  | 43    | K.DVDCAYLR.K                   | Carbamidomethyl:<br>4                      |
|     |              |      |        | 336 - 343 | 508.76  | 39.8  | K.EEINELNR.V                   |                                            |
|     |              |      |        | 417 - 424 | 511.32  | 32.1  | D.IEATYRR.L                    |                                            |
|     |              |      |        | 296 - 304 | 524.24  | 64.2  | K.AHYDDIASR.S                  |                                            |

|  |  |  |  |           |        |       |                                             |                                   |
|--|--|--|--|-----------|--------|-------|---------------------------------------------|-----------------------------------|
|  |  |  |  | 141 - 148 | 531.78 | 37    | V.RFLEQQNK.L                                |                                   |
|  |  |  |  | 133 - 141 | 533.82 | 70    | R.FAAFIDKVR.F                               |                                   |
|  |  |  |  | 384 - 393 | 536.32 | 87.2  | K.LAGLEEALQK.A                              |                                   |
|  |  |  |  | 384 - 393 | 536.84 | 50.2  | K.LAGLEEALQK.A                              | Deamidated: 9                     |
|  |  |  |  | 425 - 433 | 543.84 | 63.7  | R.LLEGEEQRL.C                               |                                   |
|  |  |  |  | 54 - 64   | 545.79 | 85.8  | R.SVSALGSCGPR.I                             | Carbamidomethyl: 8                |
|  |  |  |  | 31 - 39   | 549.19 | 57.8  | R.CCISAAPYR.G                               | Carbamidomethyl: 1, 2             |
|  |  |  |  | 257 - 264 | 554.31 | 57.6  | R.RLYEEEIR.V                                |                                   |
|  |  |  |  | 404 - 412 | 564.26 | 50.6  | K.EYQEVMSK.L                                |                                   |
|  |  |  |  | 424 - 432 | 565.27 | 56.7  | R.RLLEGEEQR.L                               |                                   |
|  |  |  |  | 347 - 356 | 565.8  | 31.6  | Q.RLTAEVENAK.C                              |                                   |
|  |  |  |  | 6 - 15    | 568.29 | 35.2  | Y.RISPGYSVTR.T                              |                                   |
|  |  |  |  | 230 - 238 | 570.28 | 26.4  | K.DVDCAYLRK.S                               | Carbamidomethyl: 4                |
|  |  |  |  | 404 - 412 | 572.29 | 28.4  | K.EYQEVMSK.L                                | Oxidation: 6                      |
|  |  |  |  | 128 - 141 | 575.67 | 30.2  | K.CLNNRFAAFIDKV<br>R.F                      | Carbamidomethyl: 1; Deamidated: 3 |
|  |  |  |  | 16 - 26   | 577.76 | 62    | R.TFSSCSAVAPK.T                             | Carbamidomethyl: 5                |
|  |  |  |  | 140 - 148 | 581.28 | 37.6  | K.VRFLEQQNK.L                               |                                   |
|  |  |  |  | 334 - 347 | 581.35 | 47.6  | R.TKEEINELNRVIQR<br>.L                      |                                   |
|  |  |  |  | 334 - 347 | 581.63 | 72    | R.TKEEINELNRVIQR<br>.L                      | Deamidated: 6                     |
|  |  |  |  | 209 - 217 | 582.79 | 61.7  | K.RYEEEEVALR.A                              |                                   |
|  |  |  |  | 394 - 403 | 589.26 | 52.1  | K.AKQDMACLLK.E                              | Carbamidomethyl: 7                |
|  |  |  |  | 218 - 228 | 596.82 | 82    | R.ATAENEFVALK.K                             |                                   |
|  |  |  |  | 218 - 228 | 597.35 | 27.8  | R.ATAENEFVALK.K                             | Deamidated: 5                     |
|  |  |  |  | 181 - 191 | 597.73 | 82.8  | R.EAECADSGR.L                               | Carbamidomethyl: 4                |
|  |  |  |  | 383 - 393 | 600.36 | 95    | C.KLAGLEEALQK.A<br>D.NIVAEIKAHYDDIA<br>SR.S |                                   |
|  |  |  |  | 289 - 304 | 605.67 | 40.6  |                                             |                                   |
|  |  |  |  | 307 - 316 | 613.78 | 46.7  | R.AEAESWYRSK.C                              |                                   |
|  |  |  |  | 334 - 343 | 623.32 | 76.9  | R.TKEEINELNR.V                              |                                   |
|  |  |  |  | 419 - 423 | 623.41 | 26.5  | E.IATYR.R                                   |                                   |
|  |  |  |  | 334 - 343 | 623.82 | 62.6  | R.TKEEINELNR.V                              | Deamidated: 6                     |
|  |  |  |  | 305 - 314 | 627.78 | 75.5  | R.SRAEAESWYR.S                              |                                   |
|  |  |  |  | 285 - 295 | 630.38 | 71.5  | D.LNMDNIVAEIK.A                             |                                   |
|  |  |  |  | 413 - 423 | 632.41 | 104.4 | K.LGLDIEIATYR.R                             |                                   |
|  |  |  |  | 384 - 395 | 635.89 | 71.2  | K.LAGLEEALQKAK.<br>Q                        |                                   |
|  |  |  |  | 296 - 306 | 645.78 | 57.7  | K.AHYDDIASRSR.A                             |                                   |
|  |  |  |  | 208 - 217 | 646.81 | 62.2  | K.KRYEEEEVALR.A                             |                                   |
|  |  |  |  | 169 - 179 | 648.37 | 79.5  | E.PLFSGYIETLR.R                             |                                   |
|  |  |  |  | 218 - 229 | 660.87 | 90.2  | R.ATAENEFVALKK.<br>D                        |                                   |
|  |  |  |  | 218 - 229 | 661.38 | 76.4  | R.ATAENEFVALKK.<br>D                        | Deamidated: 5                     |
|  |  |  |  | 382 - 393 | 680.39 | 86.6  | K.CKLAGLEEALQK.<br>A                        | Carbamidomethyl: 1                |
|  |  |  |  | 284 - 295 | 687.91 | 96.8  | R.DLNMDNIVAEIK.A                            |                                   |
|  |  |  |  | 284 - 295 | 688.38 | 36.2  | R.DLNMDNIVAEIK.A                            | Deamidated: 3                     |
|  |  |  |  | 284 - 295 | 695.85 | 73.7  | R.DLNMDNIVAEIK.A                            | Oxidation: 4                      |
|  |  |  |  | 284 - 295 | 696.38 | 26.3  | R.DLNMDNIVAEIK.A                            | Oxidation: 4;                     |

|         |              |      |       |           |         |       |                                  |                                                 |
|---------|--------------|------|-------|-----------|---------|-------|----------------------------------|-------------------------------------------------|
|         |              |      |       |           |         |       |                                  | Deamidated: 3                                   |
|         |              |      |       | 192 - 209 | 698.39  | 35.1  | R.LSSELNSLQEVLE<br>GYKKR.Y       |                                                 |
|         |              |      |       | 333 - 343 | 701.36  | 74.6  | R.RTKEEINELNR.V                  |                                                 |
|         |              |      |       | 265 - 283 | 705.05  | 72.3  | R.VLQAHISDTSVIVK<br>MDNSR.D      |                                                 |
|         |              |      |       | 192 - 204 | 730.82  | 25.7  | R.LSSELNSLQEVLE.<br>G            |                                                 |
|         |              |      |       | 344 - 356 | 735.89  | 71    | R.VIQRLTAEVENAK.<br>C            |                                                 |
|         |              |      |       | 239 - 257 | 740.43  | 52.6  | K.SDLEANVEALIQE<br>TDFLRR.L      |                                                 |
|         |              |      |       | 142 - 153 | 745.88  | 65.7  | R.FLEQQNKLLET.K.L                |                                                 |
|         |              |      |       | 142 - 153 | 746.4   | 62.4  | R.FLEQQNKLLET.K.L                | Deamidated: 6                                   |
|         |              |      |       | 265 - 278 | 755.41  | 98.8  | R.VLQAHISDTSVIVK<br>.M           |                                                 |
|         |              |      |       | 384 - 397 | 757.39  | 52.2  | K.LAGLEEALQKAKQ<br>D.M           |                                                 |
|         |              |      |       | 210 - 229 | 770.74  | 29    | R.YEEVALRATAEN<br>EFVALKK.D      |                                                 |
|         |              |      |       | 149 - 160 | 776.9   | 81.8  | K.LLETKLQFYQNR.<br>Q             |                                                 |
|         |              |      |       | 149 - 160 | 777.37  | 70.1  | K.LLETKLQFYQNR.<br>Q             | Deamidated: 7                                   |
|         |              |      |       | 238 - 257 | 783.1   | 78.2  | R.KSDLEANVEALIQ<br>ETDFLRR.L     |                                                 |
|         |              |      |       | 238 - 257 | 783.45  | 46.9  | R.KSDLEANVEALIQ<br>ETDFLRR.L     | Deamidated: 13                                  |
|         |              |      |       | 142 - 160 | 814.09  | 74.5  | R.FLEQQNKLLET.K.L<br>QFYQNR.Q    |                                                 |
|         |              |      |       | 258 - 278 | 814.75  | 41.6  | R.LYEEEIRVLQAHIS<br>DTSVIVK.M    |                                                 |
|         |              |      |       | 161 - 180 | 825.07  | 32.4  | R.QCCESNLEPLFSG<br>YIETLRR.E     | Carbamidomethyl:<br>2, 3; Deamidated:<br>1      |
|         |              |      |       | 218 - 232 | 825.42  | 55.2  | R.ATAENEFVALKKD<br>VD.C          |                                                 |
|         |              |      |       | 404 - 424 | 843.78  | 33.8  | K.EYQEVMSKGLGL<br>DIEIATYRR.L    | Deamidated: 3                                   |
|         |              |      |       | 433 - 448 | 847.39  | 132.1 | R.LCEGVGAVNVCV<br>SSSR.G         | Carbamidomethyl:<br>2, 11                       |
|         |              |      |       | 192 - 207 | 904.97  | 119.5 | R.LSSELNSLQEVLE<br>GYK.K         |                                                 |
|         |              |      |       | 192 - 207 | 905.45  | 75.1  | R.LSSELNSLQEVLE<br>GYK.K         | Deamidated: 6                                   |
|         |              |      |       | 164 - 179 | 934.54  | 47.8  | C.ESNLEPLFSGYIET<br>LR.R         |                                                 |
|         |              |      |       | 192 - 208 | 968.99  | 67.3  | R.LSSELNSLQEVLE<br>GYKK.R        |                                                 |
|         |              |      |       | 362 - 381 | 1007.51 | 131.4 | K.LEAAVTQAEQQG<br>EAALADAK.C     |                                                 |
|         |              |      |       | 239 - 256 | 1032.04 | 120.7 | K.SDLEANVEALIQE<br>TDFLR.R       |                                                 |
|         |              |      |       | 238 - 256 | 1096.04 | 106.2 | R.KSDLEANVEALIQ<br>ETDFLR.R      |                                                 |
| KAP11.1 | gij999000018 | 16.7 | 137.2 | 145 - 155 | 688.28  | 73    | R.TYQQSCVSSCR.R                  | Carbamidomethyl:<br>6, 10                       |
|         |              |      |       | 121 - 144 | 851.02  | 43.1  | R.SISTVCQPVGGVS<br>TICQPTCGVSR.T | Carbamidomethyl:<br>6, 16, 20;<br>Deamidated: 7 |
| KAP13.1 | gij999000030 | 17.4 | 490.2 | 13 - 19   | 448.79  | 40.5  | L.SLRDHLR.Y                      |                                                 |
|         |              |      |       | 148 - 157 | 526.28  | 47.4  | R.SGQSLSFQPT.C                   |                                                 |
|         |              |      |       | 136 - 144 | 576.3   | 44.8  | R.SSFYRPTFF.S                    |                                                 |

|         |              |      |       |           |         |       |                                     |                                      |
|---------|--------------|------|-------|-----------|---------|-------|-------------------------------------|--------------------------------------|
|         |              |      |       | 26 - 36   | 613.8   | 63.1  | C.GSSFPSNLVYR.T                     |                                      |
|         |              |      |       | 136 - 145 | 619.83  | 42.6  | R.SSFYRPTFFS.S                      |                                      |
|         |              |      |       | 63 - 79   | 676.32  | 30.7  | R.TQTVVSSPCQTS<br>CYRPR.T           | Carbamidomethyl:<br>9, 13            |
|         |              |      |       | 136 - 147 | 741.33  | 39.2  | R.SSFYRPTFFSSR.<br>S                |                                      |
|         |              |      |       | 148 - 163 | 861.89  | 79.9  | R.SGQSLSFQPTCG<br>SGFY.-            | Carbamidomethyl:<br>11               |
|         |              |      |       | 20 - 36   | 934.38  | 102   | R.YSGSSCGSSFPS<br>NLVYR.T           | Carbamidomethyl:<br>6                |
| KAP15.1 | gij999000032 | 14.6 | 114   | 1 - 11    | 426.2   | 28.6  | -.SFNCSTGNFSR.S                     | Carbamidomethyl:<br>4                |
|         |              |      |       | 68 - 82   | 958.41  | 85.5  | R.FFQTSCSHPQNF<br>FR.S              | Carbamidomethyl:<br>6                |
| KAP16.2 | gij999000035 | 6    | 425.6 | 49 - 56   | 488.75  | 26.5  | G.RYSSFGFL.-                        |                                      |
|         |              |      |       | 7 - 19    | 690.36  | 64.5  | N.YYGGLGYLGGF<br>R.G                |                                      |
|         |              |      |       | 1 - 19    | 1063.96 | 155.8 | -<br>.SYYYGNYYGGLGY<br>GLGGFR.G     |                                      |
|         |              |      |       | 1 - 19    | 1064.46 | 133.2 | -<br>.SYYYGNYYGGLGY<br>GLGGFR.G     | Deamidated: 6                        |
|         |              |      |       | 1 - 20    | 1092.46 | 26.4  | -<br>.SYYYGNYYGGLGY<br>GLGGFRG.L    |                                      |
| KAP19.3 | gij999000016 | 7.6  | 226.9 | 59 - 65   | 405.73  | 40.2  | R.CPSSFGR.Y                         | Carbamidomethyl:<br>1                |
|         |              |      |       | 65 - 72   | 513.76  | 30.2  | G.RYGFSSFY.-                        |                                      |
|         |              |      |       | 33 - 44   | 609.83  | 30.5  | R.RLGFSTGFGGYG.<br>C                |                                      |
|         |              |      |       | 9 - 24    | 767.89  | 99.5  | S.GLGYGYGGFGL<br>GFGR.G             |                                      |
|         |              |      |       | 1 - 24    | 870.35  | 73.3  | -<br>.CHYSNYYSGLYG<br>YGGFGLGFGR.G  | Carbamidomethyl:<br>1                |
|         |              |      |       | 1 - 24    | 870.7   | 28.8  | -<br>.CHYSNYYSGLYG<br>YGGFGLGFGR.G  | Carbamidomethyl:<br>1; Deamidated: 5 |
|         |              |      |       | 1 - 25    | 889.35  | 34.4  | -<br>.CHYSNYYSGLYG<br>YGGFGLGFGRG.C | Carbamidomethyl:<br>1                |
| KAP19.5 | gij999000015 | 7.7  | 294.2 | 34 - 41   | 427.2   | 52.9  | R.LGCGSGFR.G                        | Carbamidomethyl:<br>3                |
|         |              |      |       | 8 - 24    | 564.29  | 30.3  | Y.RGLGYGYGGFGL<br>LGFR.G            |                                      |
|         |              |      |       | 9 - 24    | 767.89  | 99.5  | R.GLGYGYGGFGL<br>GFGR.G             |                                      |
|         |              |      |       | 9 - 25    | 796.36  | 70.6  | R.GLGYGYGGFGL<br>GFGRG.C            |                                      |
| KAP6.1  | gij999000021 | 8.3  | 776   | 43 - 49   | 380.16  | 43.4  | C.GYGYGSR.S                         |                                      |
|         |              |      |       | 54 - 61   | 423.68  | 52.2  | G.SGYGYGSR.S                        |                                      |
|         |              |      |       | 53 - 61   | 452.19  | 53    | C.GSGYGYGSR.S                       |                                      |
|         |              |      |       | 42 - 49   | 460.18  | 63.1  | G.CGYGYGSR.S                        | Carbamidomethyl:<br>1                |
|         |              |      |       | 50 - 61   | 632.24  | 83.7  | R.SLCGSGYGYGSR.<br>S                | Carbamidomethyl:<br>3                |
|         |              |      |       | 36 - 49   | 763.8   | 92.1  | R.LGCGYGCYGYG<br>SR.S               | Carbamidomethyl:<br>3, 7             |
|         |              |      |       | 21 - 34   | 770.78  | 91.3  | G.LGCGYGSCYGS<br>FR.R               | Carbamidomethyl:<br>3, 8             |
|         |              |      |       | 20 - 34   | 799.28  | 99.3  | G.GLGCYGYGSCYGS<br>GFR.R            | Carbamidomethyl:<br>4, 9             |

|                |              |      |        |           |         |      |                              |                          |
|----------------|--------------|------|--------|-----------|---------|------|------------------------------|--------------------------|
|                |              |      |        | 35 - 49   | 841.81  | 76.1 | R.RLGCGYGCGYGY<br>GSR.S      | Carbamidomethyl:<br>4, 8 |
|                |              |      |        | 62 - 82   | 1109.91 | 81.4 | R.SLCGSGYGCGSG<br>YGSFGYGY.- | Carbamidomethyl:<br>3, 9 |
| KAP6.3         | gij999000020 | 8.3  | 585.1  | 43 - 49   | 380.16  | 43.4 | C.GYGYGSR.S                  |                          |
|                |              |      |        | 42 - 49   | 460.18  | 63.1 | G.CGYYGSR.S                  | Carbamidomethyl:<br>1    |
|                |              |      |        | 36 - 49   | 763.8   | 92.1 | R.LGCGYGCGYGYG<br>SR.S       | Carbamidomethyl:<br>3, 7 |
|                |              |      |        | 21 - 34   | 770.78  | 91.3 | G.LGCGYGSCYGS<br>FR.R        | Carbamidomethyl:<br>3, 8 |
|                |              |      |        | 20 - 34   | 799.28  | 99.3 | G.GLGCGYGSCYGS<br>GFR.R      | Carbamidomethyl:<br>4, 9 |
|                |              |      |        | 35 - 49   | 841.81  | 76.1 | R.RLGCGYGCGYGY<br>GSR.S      | Carbamidomethyl:<br>4, 8 |
|                |              |      |        | 50 - 65   | 845.82  | 79.4 | R.SLCGSGYGCGSR<br>PLYG.C     | Carbamidomethyl:<br>3, 9 |
| KAP6.3<br>var1 | gij999000019 | 7.1  | 575.8  | 43 - 49   | 380.16  | 43.4 | C.GYGYGSR.S                  |                          |
|                |              |      |        | 42 - 49   | 460.18  | 63.1 | G.CGYYGSR.S                  | Carbamidomethyl:<br>1    |
|                |              |      |        | 36 - 49   | 763.8   | 92.1 | R.LGCGYGCGYGYG<br>SR.S       | Carbamidomethyl:<br>3, 7 |
|                |              |      |        | 21 - 34   | 770.78  | 91.3 | G.LGCGYGSCYGS<br>FR.R        | Carbamidomethyl:<br>3, 8 |
|                |              |      |        | 20 - 34   | 799.28  | 99.3 | G.GLGCGYGSCYGS<br>GFR.R      | Carbamidomethyl:<br>4, 9 |
|                |              |      |        | 35 - 49   | 841.81  | 76.1 | R.RLGCGYGCGYGY<br>GSR.S      | Carbamidomethyl:<br>4, 8 |
|                |              |      |        | 50 - 70   | 1147.92 | 70.2 | R.SLYGCGYGCGSG<br>YGSFGYGY.- | Carbamidomethyl:<br>5, 9 |
| KAP8.1         | gij999000043 | 6.7  | 106.8  | 54 - 60   | 468.77  | 49.5 | R.RFWPFAL.Y                  |                          |
|                |              |      |        | 54 - 61   | 550.31  | 57.3 | R.RFWPFAL.Y.-                |                          |
| K31            | gij164652864 | 46.8 | 6097.7 | 224 - 229 | 366.15  | 49.8 | R.VLNETR.A                   |                          |
|                |              |      |        | 224 - 229 | 366.71  | 34   | R.VLNETR.A                   | Deamidated: 3            |
|                |              |      |        | 8 - 13    | 367.25  | 36.7 | L.PNLSFR.S                   |                          |
|                |              |      |        | 136 - 142 | 404.19  | 58.2 | K.LAADDFR.T                  |                          |
|                |              |      |        | 217 - 223 | 407.73  | 44   | A.PTVDLNR.V                  |                          |
|                |              |      |        | 67 - 73   | 412.26  | 59.2 | R.LASYLEK.V                  |                          |
|                |              |      |        | 7 - 13    | 423.77  | 40.4 | C.LPNLSFR.S                  |                          |
|                |              |      |        | 250 - 256 | 431.23  | 28.2 | R.QTEELNK.Q                  |                          |
|                |              |      |        | 287 - 293 | 434.2   | 26.6 | L.QAQHNL.R.D                 | Deamidated: 5            |
|                |              |      |        | 192 - 202 | 443.22  | 37.7 | K.SNHEEEVNTLR.S              |                          |
|                |              |      |        | 192 - 202 | 443.53  | 39.4 | K.SNHEEEVNTLR.S              | Deamidated: 2            |
|                |              |      |        | 223 - 229 | 444.19  | 35.8 | N.RVLNETR.A                  |                          |
|                |              |      |        | 153 - 164 | 467.25  | 49   | R.QLVESDINGLRR.I             |                          |
|                |              |      |        | 153 - 164 | 467.6   | 45.1 | R.QLVESDINGLRR.I             | Deamidated: 8            |
|                |              |      |        | 80 - 87   | 474.22  | 51.4 | R.ENAELESR.I                 |                          |
|                |              |      |        | 351 - 357 | 478.25  | 29.6 | E.CEINTYR.G                  | Carbamidomethyl:<br>1    |
|                |              |      |        | 230 - 241 | 483.92  | 67.4 | R.AQYEALVETNRR.<br>D         |                          |
|                |              |      |        | 230 - 241 | 484.24  | 62.8 | R.AQYEALVETNRR.<br>D         | Deamidated: 10           |
|                |              |      |        | 145 - 152 | 490.77  | 57.6 | K.YETELGLR.Q                 |                          |
|                |              |      |        | 109 - 116 | 494.75  | 65.7 | R.TIEELQKQ.I                 |                          |
|                |              |      |        | 243 - 249 | 497.78  | 53.5 | D.VEEWYIR.Q                  |                          |
|                |              |      |        | 127 - 135 | 500.33  | 75.6 | R.LVVQIDNAK.L                |                          |
|                |              |      |        | 127 - 135 | 500.81  | 60.4 | R.LVVQIDNAK.L                | Deamidated: 7            |

|  |  |  |  |           |        |      |                          |                       |
|--|--|--|--|-----------|--------|------|--------------------------|-----------------------|
|  |  |  |  | 127 - 135 | 500.84 | 51.4 | R.LVVQIDNAK.L            | Deamidated: 4         |
|  |  |  |  | 6 - 13    | 503.79 | 55.7 | F.CLPNLSFR.S             | Carbamidomethyl: 1    |
|  |  |  |  | 136 - 144 | 518.77 | 51.3 | K.LAADDFRTK.Y            |                       |
|  |  |  |  | 61 - 73   | 532.99 | 35.7 | M.QFLNDRLASYLEK.V        |                       |
|  |  |  |  | 101 - 108 | 537.8  | 63.7 | C.PNYQSYFR.T             |                       |
|  |  |  |  | 67 - 75   | 539.81 | 79.8 | R.LASYLEKVR.Q            |                       |
|  |  |  |  | 1 - 13    | 544.94 | 31.5 | .MSFNFCLPNLSFR.S         | Carbamidomethyl: 6    |
|  |  |  |  | 165 - 173 | 552.86 | 72.8 | R.ILDELTLCK.S            | Carbamidomethyl: 8    |
|  |  |  |  | 242 - 249 | 555.31 | 65.2 | R.DVEEWYIR.Q             |                       |
|  |  |  |  | 405 - 413 | 556.73 | 67.9 | R.CGPCNSYVR.-            | Carbamidomethyl: 1, 4 |
|  |  |  |  | 215 - 229 | 557.34 | 34.9 | D.AAPTVDLNRVLNE TR.A     | Deamidated: 8         |
|  |  |  |  | 221 - 229 | 557.81 | 36.7 | D.LNRVLNETR.A            |                       |
|  |  |  |  | 108 - 116 | 572.81 | 31.4 | F.RTIEELQQK.I            |                       |
|  |  |  |  | 74 - 87   | 576.96 | 48   | K.VRQLERENAELES R.I      |                       |
|  |  |  |  | 58 - 66   | 577.31 | 55.8 | K.ETMQFLNDR.L            |                       |
|  |  |  |  | 5 - 13    | 577.34 | 40.8 | N.FCLPNLSFR.S            | Carbamidomethyl: 2    |
|  |  |  |  | 335 - 348 | 578    | 44.8 | R.QNQEYQVLLDVR AR.L      |                       |
|  |  |  |  | 126 - 135 | 578.29 | 65.7 | A.RLVVQIDNAK.L           |                       |
|  |  |  |  | 58 - 66   | 585.26 | 43.2 | K.ETMQFLNDR.L            | Oxidation: 3          |
|  |  |  |  | 208 - 223 | 595.03 | 30.4 | D.RLNVEVDAAPTVD LNR.V    | Deamidated: 15        |
|  |  |  |  | 349 - 357 | 599.28 | 65.1 | R.LECEINTYR.G            | Carbamidomethyl: 3    |
|  |  |  |  | 284 - 293 | 604.32 | 62.1 | E.VELQAQHNL.R.D          |                       |
|  |  |  |  | 143 - 152 | 605.37 | 68.6 | R.TKYETELGLR.Q           |                       |
|  |  |  |  | 109 - 118 | 607.91 | 45.3 | R.TIEELQQKIL.C           |                       |
|  |  |  |  | 153 - 163 | 622.36 | 37.8 | R.QLVESDINGLR.R          |                       |
|  |  |  |  | 153 - 163 | 622.83 | 62.7 | R.QLVESDINGLR.R          | Deamidated: 8         |
|  |  |  |  | 164 - 173 | 630.86 | 48.8 | R.RILDELTLCK.S           | Carbamidomethyl: 9    |
|  |  |  |  | 241 - 249 | 633.34 | 53.4 | R.RDVEEWYIR.Q            |                       |
|  |  |  |  | 4 - 13    | 634.36 | 28   | F.NFCLPNLSFR.S           | Carbamidomethyl: 3    |
|  |  |  |  | 230 - 240 | 647.34 | 94.9 | R.AQYEALVETNR.R          |                       |
|  |  |  |  | 230 - 240 | 647.85 | 79.2 | R.AQYEALVETNR.R          | Deamidated: 2         |
|  |  |  |  | 242 - 256 | 651.34 | 43   | R.DVEEWYIRQTEEL NK.Q     |                       |
|  |  |  |  | 58 - 73   | 653.36 | 52.6 | K.ETMQFLNDRLASYLEK.V     |                       |
|  |  |  |  | 277 - 293 | 664.36 | 92.1 | R.RTVNALEVELQQAQ HNL.R.D |                       |
|  |  |  |  | 277 - 293 | 664.7  | 60.2 | R.RTVNALEVELQQAQ HNL.R.D | Deamidated: 4         |
|  |  |  |  | 192 - 202 | 664.78 | 48.7 | K.SNHEEEVNTLR.S          | Deamidated: 8         |
|  |  |  |  | 136 - 152 | 666.71 | 58.5 | K.LAADDFRTKYETE LGLR.Q   |                       |
|  |  |  |  | 290 - 306 | 667.32 | 33.3 | Q.HNLRDSLENTLTE TEAR.Y   | Deamidated: 2         |
|  |  |  |  | 203 - 214 | 672.83 | 73.9 | R.SQLGDRLNVEVD. A        |                       |

|  |  |  |  |           |         |       |                                  |                                                 |
|--|--|--|--|-----------|---------|-------|----------------------------------|-------------------------------------------------|
|  |  |  |  | 295 - 306 | 682.35  | 92.2  | D.SLENTLTETEAR.Y                 |                                                 |
|  |  |  |  | 295 - 306 | 682.83  | 93.4  | D.SLENTLTETEAR.Y                 | Deamidated: 4                                   |
|  |  |  |  | 174 - 191 | 702.06  | 43.3  | K.SDLEAQVESLKEE<br>LICKL.S       | Carbamidomethyl:<br>16                          |
|  |  |  |  | 109 - 126 | 711.37  | 37.4  | R.TIEELQQKILCAKS<br>ENAR.L       | Carbamidomethyl:<br>11; Deamidated: 6           |
|  |  |  |  | 347 - 357 | 712.85  | 62.6  | R.ARLECEINTYR.G                  | Carbamidomethyl:<br>5                           |
|  |  |  |  | 347 - 357 | 713.37  | 26.9  | R.ARLECEINTYR.G                  | Carbamidomethyl:<br>5; Deamidated: 8            |
|  |  |  |  | 224 - 241 | 721.34  | 43    | R.VLNETRAQYEALV<br>ETNRR.D       |                                                 |
|  |  |  |  | 224 - 241 | 721.68  | 40.6  | R.VLNETRAQYEALV<br>ETNRR.D       | Deamidated: 8                                   |
|  |  |  |  | 180 - 191 | 730.9   | 71.8  | Q.VESLKEELICKL.S                 | Carbamidomethyl:<br>10                          |
|  |  |  |  | 76 - 87   | 737.34  | 39    | R.QLERENAELESR.I                 |                                                 |
|  |  |  |  | 76 - 87   | 737.85  | 28    | R.QLERENAELESR.I                 | Deamidated: 1                                   |
|  |  |  |  | 58 - 75   | 738.38  | 25.2  | K.ETMQFLNDRLASV<br>LEKVR.Q       |                                                 |
|  |  |  |  | 294 - 306 | 739.83  | 110.7 | R.DSLENTLTETEAR.<br>Y            |                                                 |
|  |  |  |  | 294 - 306 | 740.33  | 93.4  | R.DSLENTLTETEAR.<br>Y            | Deamidated: 5                                   |
|  |  |  |  | 58 - 75   | 743.7   | 47.6  | K.ETMQFLNDRLASV<br>LEKVR.Q       | Oxidation: 3                                    |
|  |  |  |  | 335 - 346 | 752.9   | 100.1 | R.QNQEYQVLLDVR.<br>A             |                                                 |
|  |  |  |  | 335 - 346 | 753.43  | 73    | R.QNQEYQVLLDVR.<br>A             | Deamidated: 3                                   |
|  |  |  |  | 281 - 293 | 760.89  | 94.7  | N.ALEVELQAQHNL<br>.D             |                                                 |
|  |  |  |  | 209 - 229 | 780.11  | 43    | R.LNVEVDAAPTVDL<br>NRVLNETR.A    |                                                 |
|  |  |  |  | 209 - 223 | 813.41  | 98.2  | R.LNVEVDAAPTVDL<br>NR.V          |                                                 |
|  |  |  |  | 313 - 334 | 829.46  | 36.3  | N.QVQSLISNVESQL<br>AEIRGDLER.Q   | Deamidated: 1, 3                                |
|  |  |  |  | 208 - 229 | 832.13  | 25.7  | D.RLNVEVDAAPTVD<br>LNRVLNETR.A   |                                                 |
|  |  |  |  | 215 - 229 | 834.96  | 43.2  | D.AAPTVDLNRVLNE<br>TR.A          |                                                 |
|  |  |  |  | 174 - 188 | 851.94  | 35.2  | K.SDLEAQVESLKEE<br>L.I.C         |                                                 |
|  |  |  |  | 74 - 87   | 865.4   | 60.8  | K.VRQLERENAELES<br>R.I           | Deamidated: 3                                   |
|  |  |  |  | 208 - 223 | 891.46  | 91.2  | D.RLNVEVDAAPTVD<br>LNR.V         |                                                 |
|  |  |  |  | 59 - 73   | 914.97  | 58.9  | E.TMQFLNDRLASV<br>EK.V           |                                                 |
|  |  |  |  | 278 - 293 | 917.99  | 134.1 | R.TVNALEVELQAQH<br>NLR.D         |                                                 |
|  |  |  |  | 278 - 293 | 918.47  | 105.8 | R.TVNALEVELQAQH<br>NLR.D         | Deamidated: 10                                  |
|  |  |  |  | 278 - 293 | 918.49  | 119.9 | R.TVNALEVELQAQH<br>NLR.D         | Deamidated: 3                                   |
|  |  |  |  | 306 - 329 | 946.83  | 30.5  | A.RYSCQLNQVQSLI<br>SNVESQLAEIR.G | Carbamidomethyl:<br>4; Deamidated: 8,<br>10, 15 |
|  |  |  |  | 278 - 294 | 975.48  | 70.7  | R.TVNALEVELQAQH<br>NLRD.S        |                                                 |
|  |  |  |  | 58 - 73   | 980.04  | 40.1  | K.ETMQFLNDRLASV<br>LEK.V         | Deamidated: 4                                   |
|  |  |  |  | 174 - 191 | 1053.05 | 41.7  | K.SDLEAQVESLKEE                  | Carbamidomethyl:                                |

|     |              |      |      |           |         |      |                                           |                       |
|-----|--------------|------|------|-----------|---------|------|-------------------------------------------|-----------------------|
|     |              |      |      |           |         |      | LICLK.S                                   | 16; Deamidated: 6     |
|     |              |      |      | 92 - 108  | 1072.49 | 72   | R.SQQQEPLVCPNY<br>QSYFR.T                 | Carbamidomethyl:<br>9 |
|     |              |      |      | 278 - 306 | 1099.18 | 29.1 | R.TVNALEVELQAQH<br>NLRDSLENTLTETEA<br>R.Y | Deamidated: 14        |
|     |              |      |      | 203 - 223 | 1141.57 | 90.9 | R.SQLGDRLNVEVD<br>AAPTVDLNR.V             |                       |
|     |              |      |      | 203 - 223 | 1142.07 | 38.4 | R.SQLGDRLNVEVD<br>AAPTVDLNR.V             | Deamidated: 2         |
| K34 | gi 309323371 | 46.6 | 5554 | 152 - 160 | 351.5   | 44.4 | K.LASDDFR.TK.Y                            |                       |
|     |              |      |      | 240 - 245 | 366.15  | 49.8 | R.VLNETR.A                                |                       |
|     |              |      |      | 240 - 245 | 366.71  | 34   | R.VLNETR.A                                | Deamidated: 3         |
|     |              |      |      | 233 - 239 | 407.73  | 44   | A.PTVDLNR.V                               |                       |
|     |              |      |      | 152 - 158 | 412.18  | 62.1 | K.LASDDFR.T                               |                       |
|     |              |      |      | 83 - 89   | 412.26  | 59.2 | R.LASYLEK.V                               |                       |
|     |              |      |      | 266 - 272 | 431.23  | 28.2 | R.QTEELNK.Q                               |                       |
|     |              |      |      | 303 - 309 | 434.2   | 26.6 | L.QAQHNL.R.D                              | Deamidated: 5         |
|     |              |      |      | 208 - 218 | 442.9   | 71.8 | K.KNHEEEANSLR.S                           |                       |
|     |              |      |      | 208 - 218 | 443.22  | 40   | K.KNHEEEANSLR.S                           | Deamidated: 2         |
|     |              |      |      | 239 - 245 | 444.19  | 35.8 | N.RVLNETR.A                               |                       |
|     |              |      |      | 159 - 165 | 456.68  | 39   | R.TKYESER.S                               |                       |
|     |              |      |      | 96 - 103  | 474.22  | 51.4 | R.ENAELES.R.I                             |                       |
|     |              |      |      | 246 - 257 | 483.92  | 67.4 | R.AQYEALVETNRR.<br>D                      |                       |
|     |              |      |      | 246 - 257 | 484.24  | 62.8 | R.AQYEALVETNRR.<br>D                      | Deamidated: 10        |
|     |              |      |      | 125 - 132 | 494.75  | 65.7 | R.TIEELQQK.I                              |                       |
|     |              |      |      | 259 - 265 | 497.78  | 53.5 | D.VEEWYIR.Q                               |                       |
|     |              |      |      | 143 - 151 | 507.32  | 73.1 | R.LVIQIDNAK.L                             |                       |
|     |              |      |      | 143 - 151 | 507.85  | 65.1 | R.LVIQIDNAK.L                             | Deamidated: 7         |
|     |              |      |      | 77 - 89   | 532.99  | 35.7 | M.QFLNDR.LASYLEK<br>.V                    |                       |
|     |              |      |      | 117 - 124 | 537.8   | 63.7 | C.PNYQSYFR.T                              |                       |
|     |              |      |      | 83 - 91   | 539.81  | 79.8 | R.LASYLEKVR.Q                             |                       |
|     |              |      |      | 181 - 189 | 552.86  | 72.8 | R.ILDELTLCK.S                             | Carbamidomethyl:<br>8 |
|     |              |      |      | 258 - 265 | 555.31  | 65.2 | R.DVEEWYIR.Q                              |                       |
|     |              |      |      | 231 - 245 | 557.34  | 34.9 | D.AAPTVDLNRVLNE<br>TR.A                   | Deamidated: 8         |
|     |              |      |      | 237 - 245 | 557.81  | 36.7 | D.LNRVLNETR.A                             |                       |
|     |              |      |      | 365 - 373 | 562.76  | 65.1 | R.LESEINTYR.G                             |                       |
|     |              |      |      | 124 - 132 | 572.81  | 31.4 | F.RTIEELQQK.I                             |                       |
|     |              |      |      | 152 - 165 | 572.96  | 36.1 | K.LASDDFR.TKYESE<br>R.S                   |                       |
|     |              |      |      | 90 - 103  | 576.96  | 48   | K.VRQLERENAELES<br>R.I                    |                       |
|     |              |      |      | 74 - 82   | 577.31  | 55.8 | K.ETMQFLNDR.L                             |                       |
|     |              |      |      | 74 - 82   | 585.26  | 43.2 | K.ETMQFLNDR.L                             | Oxidation: 3          |
|     |              |      |      | 224 - 239 | 595.03  | 30.4 | D.RLNVEVDAAPTVD<br>LNR.V                  | Deamidated: 15        |
|     |              |      |      | 166 - 180 | 596.03  | 38.2 | R.SLRQLVESDINSL<br>RR.I                   |                       |
|     |              |      |      | 166 - 180 | 596.34  | 30.5 | R.SLRQLVESDINSL<br>RR.I                   | Deamidated: 11        |
|     |              |      |      | 209 - 218 | 599.74  | 63.7 | K.NHEEEANSLR.S                            |                       |
|     |              |      |      | 209 - 218 | 600.29  | 44.5 | K.NHEEEANSLR.S                            | Deamidated: 1         |
|     |              |      |      | 300 - 309 | 604.32  | 62.1 | E.VELQAQHNL.R.D                           |                       |



|  |  |  |  |           |        |       |                                |                        |
|--|--|--|--|-----------|--------|-------|--------------------------------|------------------------|
|  |  |  |  | 125 - 134 | 607.91 | 45.3  | R.TIEELQQKIL.C                 |                        |
|  |  |  |  | 180 - 189 | 630.86 | 48.8  | R.RILDELTLCK.S                 | Carbamidomethyl:<br>9  |
|  |  |  |  | 257 - 265 | 633.34 | 53.4  | R.RDVEEWYIR.Q                  |                        |
|  |  |  |  | 169 - 179 | 637.32 | 47.4  | R.QLVESDINSLR.R                |                        |
|  |  |  |  | 364 - 373 | 640.79 | 36.6  | A.RLESEINTYR.G                 |                        |
|  |  |  |  | 246 - 256 | 647.34 | 94.9  | R.AQYEALVETNR.R                |                        |
|  |  |  |  | 246 - 256 | 647.85 | 79.2  | R.AQYEALVETNR.R                | Deamidated: 2          |
|  |  |  |  | 258 - 272 | 651.34 | 43    | R.DVEEWYIRQTEEL<br>NK.Q        |                        |
|  |  |  |  | 74 - 89   | 653.36 | 52.6  | K.ETMQFLNDRASY<br>LEK.V        |                        |
|  |  |  |  | 293 - 309 | 664.36 | 92.1  | R.RTVNALEVELQAQ<br>HNLR.D      |                        |
|  |  |  |  | 293 - 309 | 664.7  | 60.2  | R.RTVNALEVELQAQ<br>HNLR.D      | Deamidated: 4          |
|  |  |  |  | 306 - 322 | 667.32 | 33.3  | Q.HNLRDSLENTL<br>TEAR.Y        | Deamidated: 2          |
|  |  |  |  | 219 - 230 | 672.83 | 73.9  | R.SQLGDRLNVEVD.<br>A           |                        |
|  |  |  |  | 363 - 373 | 676.39 | 82    | K.ARLESEINTYR.G                |                        |
|  |  |  |  | 363 - 373 | 676.84 | 69.6  | K.ARLESEINTYR.G                | Deamidated: 8          |
|  |  |  |  | 311 - 322 | 682.35 | 92.2  | D.SLENTLTETEAR.Y               |                        |
|  |  |  |  | 311 - 322 | 682.83 | 93.4  | D.SLENTLTETEAR.Y               | Deamidated: 4          |
|  |  |  |  | 346 - 362 | 693.05 | 57.5  | R.SDLERQONQEYQV<br>LLDVK.A     |                        |
|  |  |  |  | 190 - 207 | 702.06 | 43.3  | K.SDLEAQVESLKEE<br>LLCLK.K     | Carbamidomethyl:<br>16 |
|  |  |  |  | 240 - 257 | 721.34 | 43    | R.VLNETRAQYEALV<br>ETNRR.D     |                        |
|  |  |  |  | 240 - 257 | 721.68 | 40.6  | R.VLNETRAQYEALV<br>ETNRR.D     | Deamidated: 8          |
|  |  |  |  | 196 - 207 | 730.9  | 71.8  | Q.VESLKEELLCLK.K               | Carbamidomethyl:<br>10 |
|  |  |  |  | 92 - 103  | 737.34 | 39    | R.QLERENAELESR.I               |                        |
|  |  |  |  | 92 - 103  | 737.85 | 28    | R.QLERENAELESR.I               | Deamidated: 1          |
|  |  |  |  | 74 - 91   | 738.38 | 25.2  | K.ETMQFLNDRASY<br>LEKVR.Q      |                        |
|  |  |  |  | 310 - 322 | 739.83 | 110.7 | R.DSLENTLTETEAR.<br>Y          |                        |
|  |  |  |  | 310 - 322 | 740.33 | 93.4  | R.DSLENTLTETEAR.<br>Y          | Deamidated: 5          |
|  |  |  |  | 74 - 91   | 743.7  | 47.6  | K.ETMQFLNDRASY<br>LEKVR.Q      | Oxidation: 3           |
|  |  |  |  | 190 - 208 | 744.75 | 35.6  | K.SDLEAQVESLKEE<br>LLCLK.N     | Carbamidomethyl:<br>16 |
|  |  |  |  | 297 - 309 | 760.89 | 94.7  | N.ALEVELQAQHNL<br>.D           |                        |
|  |  |  |  | 225 - 245 | 780.11 | 43    | R.LNVEVDAAPTVDL<br>NRVLNETR.A  |                        |
|  |  |  |  | 138 - 151 | 793.87 | 53.4  | K.SENSRLVIQIDNAK<br>.L         |                        |
|  |  |  |  | 225 - 239 | 813.41 | 98.2  | R.LNVEVDAAPTVDL<br>NR.V        |                        |
|  |  |  |  | 166 - 179 | 815.47 | 62.6  | R.SLRQLVESDINSL<br>R.R         |                        |
|  |  |  |  | 224 - 245 | 832.13 | 25.7  | D.RLNVEVDAAPTVD<br>LNRVLNETR.A |                        |
|  |  |  |  | 231 - 245 | 834.96 | 43.2  | D.AAPTVDLNRVLNE<br>TR.A        |                        |
|  |  |  |  | 190 - 204 | 851.94 | 35.2  | K.SDLEAQVESLKEE<br>LL.C        |                        |

|     |              |      |        |           |         |       |                                          |                                        |
|-----|--------------|------|--------|-----------|---------|-------|------------------------------------------|----------------------------------------|
|     |              |      |        | 351 - 364 | 852.45  | 66.9  | R.QNQEYQVLLDVK<br>AR.L                   |                                        |
|     |              |      |        | 90 - 103  | 865.4   | 60.8  | K.VRQLERENAELES<br>R.I                   | Deamidated: 3                          |
|     |              |      |        | 16 - 29   | 877.81  | 28.6  | S.TMSYSCCLPTLSY<br>R.S                   | Carbamidomethyl:<br>6, 7; Oxidation: 2 |
|     |              |      |        | 224 - 239 | 891.46  | 91.2  | D.RLNVEVDAAPTVD<br>LNR.V                 |                                        |
|     |              |      |        | 75 - 89   | 914.97  | 58.9  | E.TMQFLNDRLASYL<br>EK.V                  |                                        |
|     |              |      |        | 294 - 309 | 917.99  | 134.1 | R.TVNALEVELQAQH<br>NLR.D                 |                                        |
|     |              |      |        | 294 - 309 | 918.47  | 105.8 | R.TVNALEVELQAQH<br>NLR.D                 | Deamidated: 10                         |
|     |              |      |        | 294 - 309 | 918.49  | 119.9 | R.TVNALEVELQAQH<br>NLR.D                 | Deamidated: 3                          |
|     |              |      |        | 294 - 310 | 975.48  | 70.7  | R.TVNALEVELQAQH<br>NLRD.S                |                                        |
|     |              |      |        | 74 - 89   | 980.04  | 40.1  | K.ETMQFLNDRLASYL<br>LEK.V                | Deamidated: 4                          |
|     |              |      |        | 190 - 207 | 1053.05 | 41.7  | K.SDLEAQVESLKEE<br>LLCLK.K               | Carbamidomethyl:<br>16; Deamidated: 6  |
|     |              |      |        | 108 - 124 | 1079.52 | 83.8  | R.SQQEPLLCPNY<br>QSYFR.T                 | Carbamidomethyl:<br>9                  |
|     |              |      |        | 294 - 322 | 1099.18 | 29.1  | R.TVNALEVELQAQH<br>NLRDSENTLTETEA<br>R.Y | Deamidated: 14                         |
|     |              |      |        | 219 - 239 | 1141.57 | 90.9  | R.SQLGDRLNVEVD<br>AAPTVDLNR.V            |                                        |
|     |              |      |        | 219 - 239 | 1142.07 | 38.4  | R.SQLGDRLNVEVD<br>AAPTVDLNR.V            | Deamidated: 2                          |
| K83 | gij312283588 | 53.9 | 5771.2 | 39 - 44   | 378.16  | 25.6  | R.GISCYR.G                               | Carbamidomethyl:<br>4                  |
|     |              |      |        | 122 - 128 | 406.22  | 56.2  | R.FAAFIDK.V                              |                                        |
|     |              |      |        | 413 - 422 | 414.92  | 32.3  | R.RLLEGEEQRL.C                           |                                        |
|     |              |      |        | 45 - 53   | 426.2   | 57.6  | R.GLTGGFGSR.S                            |                                        |
|     |              |      |        | 220 - 226 | 441.72  | 48.2  | D.VDCAYVR.K                              | Carbamidomethyl:<br>3                  |
|     |              |      |        | 131 - 137 | 453.7   | 36.2  | R.FLEQQNK.L                              |                                        |
|     |              |      |        | 322 - 332 | 468.26  | 27    | R.RTKEEINELNR.V                          | Deamidated: 7                          |
|     |              |      |        | 402 - 413 | 473.95  | 71    | K.LGLDIEIATYRR.L                         |                                        |
|     |              |      |        | 247 - 253 | 476.25  | 56.3  | R.LYEEEIR.V                              |                                        |
|     |              |      |        | 143 - 149 | 476.79  | 37.9  | K.LQFFQNR.Q                              |                                        |
|     |              |      |        | 414 - 421 | 487.22  | 73.6  | R.LLEGEEQR.L                             |                                        |
|     |              |      |        | 337 - 345 | 487.74  | 51.9  | R.LTAEVENAK.C                            |                                        |
|     |              |      |        | 219 - 226 | 499.25  | 54.4  | K.DVDCAYVR.K                             | Carbamidomethyl:<br>4                  |
|     |              |      |        | 44 - 53   | 504.25  | 44.3  | Y.RGLTGGFGSR.S                           |                                        |
|     |              |      |        | 199 - 206 | 504.77  | 61.9  | K.YEEVALR.A                              |                                        |
|     |              |      |        | 325 - 336 | 504.94  | 42.2  | K.EEINELNRVIQR.L                         |                                        |
|     |              |      |        | 296 - 303 | 506.23  | 60.9  | R.AEAESWYR.S                             |                                        |
|     |              |      |        | 16 - 29   | 507.92  | 32.9  | R.AFSCVSACGPRP<br>GR.C                   | Carbamidomethyl:<br>4, 8               |
|     |              |      |        | 325 - 332 | 508.76  | 39.8  | K.EEINELNR.V                             |                                        |
|     |              |      |        | 406 - 413 | 511.32  | 32.1  | D.IEATYRR.L                              |                                        |
|     |              |      |        | 285 - 293 | 519.76  | 74.8  | K.AQYDDIASR.S                            |                                        |
|     |              |      |        | 130 - 137 | 531.78  | 37    | V.RFLEQQNK.L                             |                                        |
|     |              |      |        | 122 - 130 | 533.82  | 70    | R.FAAFIDKVR.F                            |                                        |
|     |              |      |        | 373 - 382 | 536.32  | 87.2  | K.LAGLEEALQK.A                           |                                        |
|     |              |      |        | 373 - 382 | 536.84  | 50.2  | K.LAGLEEALQK.A                           | Deamidated: 9                          |

|  |  |  |  |           |        |       |                             |                                      |
|--|--|--|--|-----------|--------|-------|-----------------------------|--------------------------------------|
|  |  |  |  | 143 - 150 | 540.78 | 41.9  | K.LQFFQNRQ.C                |                                      |
|  |  |  |  | 414 - 422 | 543.84 | 63.7  | R.LLEGEEQRL.C               |                                      |
|  |  |  |  | 246 - 253 | 554.31 | 57.6  | R.RLYEEEEIR.V               |                                      |
|  |  |  |  | 30 - 38   | 556.25 | 66.8  | R.CCITAAPYR.G               | Carbamidomethyl:<br>1, 2             |
|  |  |  |  | 393 - 401 | 564.26 | 50.6  | K.EYQEVMSK.L                |                                      |
|  |  |  |  | 413 - 421 | 565.27 | 56.7  | R.RLLEGEEQR.L               |                                      |
|  |  |  |  | 336 - 345 | 565.8  | 31.6  | Q.RLTAEVENAK.C              |                                      |
|  |  |  |  | 198 - 206 | 568.79 | 71.5  | K.KYEEEEVALR.A              |                                      |
|  |  |  |  | 393 - 401 | 572.29 | 28.4  | K.EYQEVMSK.L                | Oxidation: 6                         |
|  |  |  |  | 117 - 130 | 575.67 | 30.2  | K.CLNNRFAAFIDKV<br>R.F      | Carbamidomethyl:<br>1; Deamidated: 3 |
|  |  |  |  | 4 - 15    | 579.81 | 86.2  | C.GFSTVSGFGSR.<br>A         |                                      |
|  |  |  |  | 129 - 137 | 581.28 | 37.6  | K.VRFLEQQNK.L               |                                      |
|  |  |  |  | 323 - 336 | 581.35 | 47.6  | R.TKEEINELNRVIQR<br>.L      |                                      |
|  |  |  |  | 323 - 336 | 581.63 | 72    | R.TKEEINELNRVIQR<br>.L      | Deamidated: 6                        |
|  |  |  |  | 383 - 392 | 589.26 | 52.1  | K.AKQDMACLK.E               | Carbamidomethyl:<br>7                |
|  |  |  |  | 207 - 217 | 596.82 | 82    | R.ATAENEFVALK.K             |                                      |
|  |  |  |  | 207 - 217 | 597.35 | 27.8  | R.ATAENEFVALK.K             | Deamidated: 5                        |
|  |  |  |  | 372 - 382 | 600.36 | 95    | C.KLAGLEEALQK.A             |                                      |
|  |  |  |  | 16 - 26   | 606.22 | 49.8  | R.AFSCVSACGPR.P             | Carbamidomethyl:<br>4, 8             |
|  |  |  |  | 170 - 180 | 611.72 | 87.6  | R.EAECVEADSGR.L             | Carbamidomethyl:<br>4                |
|  |  |  |  | 296 - 305 | 613.78 | 46.7  | R.AEAESWYRSK.C              |                                      |
|  |  |  |  | 323 - 332 | 623.32 | 76.9  | R.TKEEINELNR.V              |                                      |
|  |  |  |  | 408 - 412 | 623.41 | 26.5  | E.IATYR.R                   |                                      |
|  |  |  |  | 323 - 332 | 623.82 | 62.6  | R.TKEEINELNR.V              | Deamidated: 6                        |
|  |  |  |  | 294 - 303 | 627.78 | 75.5  | R.SRAEAESWYR.S              |                                      |
|  |  |  |  | 402 - 412 | 632.41 | 104.4 | K.LGLDIEIATYR.R             |                                      |
|  |  |  |  | 197 - 206 | 632.85 | 60.6  | K.KYEEEEVALR.A              |                                      |
|  |  |  |  | 373 - 384 | 635.89 | 71.2  | K.LAGLEEALQKAK.<br>Q        |                                      |
|  |  |  |  | 285 - 295 | 641.3  | 56.1  | K.AQYDDIASRSR.A             |                                      |
|  |  |  |  | 181 - 197 | 658.36 | 33.8  | R.LSSELNHVQEVLE<br>GYKK.K   |                                      |
|  |  |  |  | 181 - 197 | 658.7  | 31.3  | R.LSSELNHVQEVLE<br>GYKK.K   | Deamidated: 9                        |
|  |  |  |  | 3 - 15    | 659.78 | 77.4  | T.CGFSTVSGFGS<br>R.A        | Carbamidomethyl:<br>1                |
|  |  |  |  | 207 - 218 | 660.87 | 90.2  | R.ATAENEFVALKK.<br>D        |                                      |
|  |  |  |  | 207 - 218 | 661.38 | 76.4  | R.ATAENEFVALKK.<br>D        | Deamidated: 5                        |
|  |  |  |  | 230 - 246 | 673.07 | 48.6  | D.LEANSEALIQEIDF<br>LRR.L   |                                      |
|  |  |  |  | 371 - 382 | 680.39 | 86.6  | R.CKLAGLEEALQK.<br>A        | Carbamidomethyl:<br>1                |
|  |  |  |  | 322 - 332 | 701.36 | 74.6  | R.RTKEEINELNR.V             |                                      |
|  |  |  |  | 2 - 15    | 710.28 | 112.2 | M.TCGFSTVSGFG<br>SR.A       | Carbamidomethyl:<br>2                |
|  |  |  |  | 273 - 284 | 710.89 | 66.4  | R.DLNMDCIVAEIK.A            | Carbamidomethyl:<br>6                |
|  |  |  |  | 227 - 245 | 731.09 | 41.2  | R.KSDLEANSEALIQ<br>EIDFLR.R |                                      |
|  |  |  |  | 333 - 345 | 735.89 | 71    | R.VIQRLTAEVENAK.            |                                      |

|     |              |      |        |           |         |       |                              |                        |
|-----|--------------|------|--------|-----------|---------|-------|------------------------------|------------------------|
|     |              |      |        |           |         |       | C                            |                        |
|     |              |      |        | 254 - 267 | 743.91  | 113.2 | R.VLQANISDTSVIVK.M           |                        |
|     |              |      |        | 131 - 142 | 745.88  | 65.7  | R.FLEQQNKLETK.L              |                        |
|     |              |      |        | 131 - 142 | 746.4   | 62.4  | R.FLEQQNKLETK.L              | Deamidated: 6          |
|     |              |      |        | 373 - 386 | 757.39  | 52.2  | K.LAGLEEALQKAKQ.D.M          |                        |
|     |              |      |        | 138 - 149 | 768.91  | 86.1  | K.LLETKLQFFQNR.Q             |                        |
|     |              |      |        | 199 - 218 | 770.74  | 29    | K.YEEEEVALRATAEN.EFVALKK.D   |                        |
|     |              |      |        | 349 - 370 | 776.78  | 28.2  | N.SKLEAAVTQAEQ.QGEVALNDAR.C  |                        |
|     |              |      |        | 227 - 246 | 783.07  | 63.9  | R.KSDLEANSEALIQ.EIDFLRR.L    |                        |
|     |              |      |        | 227 - 246 | 783.44  | 34    | R.KSDLEANSEALIQ.EIDFLRR.L    | Deamidated: 7          |
|     |              |      |        | 247 - 267 | 807.42  | 35.5  | R.LYEEEEIRVLQANIS.DTSVIVK.M  | Deamidated: 12         |
|     |              |      |        | 131 - 149 | 808.75  | 57.7  | R.FLEQQNKLETKL.QFFQNR.Q      |                        |
|     |              |      |        | 131 - 149 | 809.07  | 42.2  | R.FLEQQNKLETKL.QFFQNR.Q      | Deamidated: 4          |
|     |              |      |        | 131 - 149 | 809.09  | 51.1  | R.FLEQQNKLETKL.QFFQNR.Q      | Deamidated: 6          |
|     |              |      |        | 207 - 221 | 825.42  | 55.2  | R.ATAENEFVALKKD.VD.C         |                        |
|     |              |      |        | 393 - 413 | 843.78  | 33.8  | K.EYQEVMSKGLGL.DIEIATYRR.L   | Deamidated: 3          |
|     |              |      |        | 422 - 437 | 847.39  | 132.1 | R.LCEGVGAVNVCV.SSSR.G        | Carbamidomethyl: 2, 11 |
|     |              |      |        | 246 - 267 | 859.43  | 29.4  | R.RLYEEEEIRVLQANI.SDTSVIVK.M | Deamidated: 13         |
|     |              |      |        | 181 - 196 | 922.97  | 94.9  | R.LSSELNHHVQEVLE.GYK.K       |                        |
|     |              |      |        | 230 - 245 | 930.96  | 89    | D.LEANSEALIQEIDF.LR.R        |                        |
|     |              |      |        | 228 - 245 | 1032.01 | 94.5  | K.SDLEANSEALIQEID.FLR.R      |                        |
|     |              |      |        | 351 - 370 | 1057.04 | 125.5 | K.LEAAVTQAEQQG.EVALNDAR.C    |                        |
|     |              |      |        | 227 - 245 | 1096.54 | 60.7  | R.KSDLEANSEALIQ.EIDFLR.R     | Deamidated: 7          |
| K85 | gj 164652870 | 56.3 | 4789.3 | 263 - 272 | 414.92  | 32.3  | R.RLLEGEEQRL.C               |                        |
|     |              |      |        | 172 - 182 | 468.26  | 27    | R.RTKKEINELNR.V              | Deamidated: 7          |
|     |              |      |        | 252 - 263 | 473.95  | 71    | K.LGLDIEIATYRR.L             |                        |
|     |              |      |        | 264 - 271 | 487.22  | 73.6  | R.LLEGEEQR.L                 |                        |
|     |              |      |        | 187 - 195 | 494.77  | 55.4  | R.LTAEIENAK.C                |                        |
|     |              |      |        | 49 - 56   | 504.77  | 61.9  | K.YEEEEVALR.A                |                        |
|     |              |      |        | 175 - 186 | 504.94  | 42.2  | K.EEINELNRVIQR.L             |                        |
|     |              |      |        | 146 - 153 | 506.23  | 60.9  | R.AEAESWYR.S                 |                        |
|     |              |      |        | 69 - 76   | 506.27  | 43    | K.DVDCAYLR.K                 | Carbamidomethyl: 4     |
|     |              |      |        | 175 - 182 | 508.76  | 39.8  | K.EEINELNR.V                 |                        |
|     |              |      |        | 256 - 263 | 511.32  | 32.1  | D.IEATYRR.L                  |                        |
|     |              |      |        | 135 - 143 | 519.76  | 74.8  | K.AQYDDIASR.S                |                        |
|     |              |      |        | 328 - 337 | 523.16  | 55    | R.ASSFSCGSSR.S               | Carbamidomethyl: 6     |
|     |              |      |        | 293 - 303 | 535.25  | 59.7  | C.GGLTYSSTAGR.Q              |                        |
|     |              |      |        | 223 - 232 | 536.32  | 87.2  | K.LAGLEEALQK.A               |                        |
|     |              |      |        | 223 - 232 | 536.84  | 50.2  | K.LAGLEEALQK.A               | Deamidated: 9          |

|  |  |  |  |           |        |       |                                  |                                     |
|--|--|--|--|-----------|--------|-------|----------------------------------|-------------------------------------|
|  |  |  |  | 264 - 272 | 543.84 | 63.7  | R.LLEGEEQRL.C                    |                                     |
|  |  |  |  | 243 - 251 | 564.26 | 50.6  | K.EYQEVMSK.L                     |                                     |
|  |  |  |  | 263 - 271 | 565.27 | 56.7  | R.RLLEGEEQRL.L                   |                                     |
|  |  |  |  | 48 - 56   | 568.79 | 71.5  | K.KYEEEEVALR.A                   |                                     |
|  |  |  |  | 69 - 77   | 570.28 | 26.4  | K.DVDCAYLRK.S                    | Carbamidomethyl:<br>4               |
|  |  |  |  | 243 - 251 | 572.29 | 28.4  | K.EYQEVMSK.L                     | Oxidation: 6                        |
|  |  |  |  | 173 - 186 | 581.35 | 47.6  | R.TKEEINELNRVIQR<br>.L           |                                     |
|  |  |  |  | 173 - 186 | 581.63 | 72    | R.TKEEINELNRVIQR<br>.L           | Deamidated: 6                       |
|  |  |  |  | 233 - 242 | 589.26 | 52.1  | K.AKQDMACLK.E                    | Carbamidomethyl:<br>7               |
|  |  |  |  | 20 - 30   | 600.26 | 75.6  | R.EAEHVEADSGR.L                  |                                     |
|  |  |  |  | 222 - 232 | 600.36 | 95    | S.KLAGLEEALQK.A                  |                                     |
|  |  |  |  | 57 - 67   | 610.85 | 81.9  | R.ATAENEFVVLK.K                  |                                     |
|  |  |  |  | 146 - 155 | 613.78 | 46.7  | R.AEAESWYRSK.C                   |                                     |
|  |  |  |  | 173 - 182 | 623.32 | 76.9  | R.TKEEINELNR.V                   |                                     |
|  |  |  |  | 258 - 262 | 623.41 | 26.5  | E.IATYR.R                        |                                     |
|  |  |  |  | 173 - 182 | 623.82 | 62.6  | R.TKEEINELNR.V                   | Deamidated: 6                       |
|  |  |  |  | 144 - 153 | 627.78 | 75.5  | R.SRAEAESWYR.S                   |                                     |
|  |  |  |  | 252 - 262 | 632.41 | 104.4 | K.LGLDIEIATYR.R                  |                                     |
|  |  |  |  | 47 - 56   | 632.85 | 60.6  | K.KKYEEEEVALR.A                  |                                     |
|  |  |  |  | 223 - 234 | 635.89 | 71.2  | K.LAGLEEALQKAK.<br>Q             |                                     |
|  |  |  |  | 135 - 145 | 641.3  | 56.1  | K.AQYDDIASRSR.A                  |                                     |
|  |  |  |  | 221 - 232 | 643.88 | 106   | R.SKLAGLEEALQK.<br>A             |                                     |
|  |  |  |  | 31 - 47   | 653.39 | 35    | R.LASELNHVQEVLE<br>GYKK.K        | Deamidated: 6                       |
|  |  |  |  | 78 - 95   | 670.04 | 33.9  | K.SDLEANVEALVEE<br>SNFLK.R       | Deamidated: 15                      |
|  |  |  |  | 57 - 68   | 674.87 | 85    | R.ATAENEFVVLKK.<br>D             |                                     |
|  |  |  |  | 57 - 68   | 675.39 | 69.4  | R.ATAENEFVVLKK.<br>D             | Deamidated: 5                       |
|  |  |  |  | 31 - 48   | 695.71 | 37.6  | R.LASELNHVQEVLE<br>GYKKK.Y       |                                     |
|  |  |  |  | 172 - 182 | 701.36 | 74.6  | R.RTKEEINELNR.V                  |                                     |
|  |  |  |  | 289 - 303 | 728.82 | 74    | G.GVACGGLTYSS<br>AGR.Q           | Carbamidomethyl:<br>4               |
|  |  |  |  | 154 - 165 | 734.37 | 57.1  | R.SKCEEMKATVIR.<br>H             | Carbamidomethyl:<br>3; Oxidation: 6 |
|  |  |  |  | 221 - 234 | 743.44 | 74.7  | R.SKLAGLEEALQKA<br>K.Q           |                                     |
|  |  |  |  | 288 - 303 | 757.33 | 96    | R.GGVACGGLTYSS<br>TAGR.Q         | Carbamidomethyl:<br>5               |
|  |  |  |  | 223 - 236 | 757.39 | 52.2  | K.LAGLEEALQKAKQ<br>D.M           |                                     |
|  |  |  |  | 199 - 220 | 762.71 | 74.2  | R.TKLEAAVAEAEQQ<br>GAAALNDAR.S   | Deamidated: 13                      |
|  |  |  |  | 77 - 96   | 764.44 | 84.2  | R.KSDLEANVEALVE<br>ESNFLKR.L     |                                     |
|  |  |  |  | 77 - 96   | 764.77 | 33.8  | R.KSDLEANVEALVE<br>ESNFLKR.L     | Deamidated: 16                      |
|  |  |  |  | 1 - 19    | 791.05 | 41.4  | -<br>.CCESNLEPLFNGYI<br>ETLRR.E  | Carbamidomethyl:<br>1, 2            |
|  |  |  |  | 304 - 327 | 794.71 | 79.9  | R.QIASGPVATGGSI<br>TVLAPDSCQPR.A | Carbamidomethyl:<br>21              |
|  |  |  |  | 97 - 117  | 800.78 | 45.9  | R.LYDEEIQILNAHIS                 |                                     |

|                                        |              |       |        |                  |         |       |                                    |                                             |
|----------------------------------------|--------------|-------|--------|------------------|---------|-------|------------------------------------|---------------------------------------------|
|                                        |              |       |        |                  |         |       | DTSVIVK.M                          |                                             |
|                                        |              |       |        | 57 - 71          | 839.44  | 34.3  | R.ATAENEFVVLKGD<br>VD.C            |                                             |
|                                        |              |       |        | 243 - 263        | 843.78  | 33.8  | K.EYQEVMSKLG<br>L<br>DIEIATYRR.L   | Deamidated: 3                               |
|                                        |              |       |        | 272 - 287        | 855.36  | 126.5 | R.LCEGVGSVNV<br>CV<br>SSSR.G       | Carbamidomethyl:<br>2, 11                   |
|                                        |              |       |        | 31 - 46          | 914.99  | 138.7 | R.LASELNHVQEV<br>LE<br>GYK.K       |                                             |
|                                        |              |       |        | 78 - 95          | 1004.01 | 115.6 | K.SDLEANVEALV<br>EE<br>SNFLK.R     |                                             |
|                                        |              |       |        | 201 - 220        | 1028.51 | 158.4 | K.LEAAVAEAEQ<br>QG<br>EAALNDAR.S   |                                             |
|                                        |              |       |        | 77 - 95          | 1068.04 | 129.9 | R.KSDLEANVEAL<br>VE<br>ESNFLK.R    |                                             |
|                                        |              |       |        | 78 - 96          | 1082.11 | 92.1  | K.SDLEANVEALV<br>EE<br>SNFLK.R.L   |                                             |
|                                        |              |       |        | 199 - 220        | 1143.05 | 172.5 | R.TKLEAAVAEAE<br>EQ<br>GAAALNDAR.S |                                             |
|                                        |              |       |        | 199 - 220        | 1143.54 | 74.3  | R.TKLEAAVAEAE<br>EQ<br>GAAALNDAR.S | Deamidated: 19                              |
| KAP7                                   | gij224555962 | 8.8   | 181.5  | 4 - 23           | 821.97  | 52.6  | R.FFCCGSYFPGY<br>P<br>SYGTNFHR.T   | Carbamidomethyl:<br>3, 4                    |
|                                        |              |       |        | 4 - 23           | 822.36  | 26.2  | R.FFCCGSYFPGY<br>P<br>SYGTNFHR.T   | Carbamidomethyl:<br>3, 4; Deamidated:<br>17 |
|                                        |              |       |        | 8 - 23           | 925.39  | 82.3  | C.GSYFPGYPSY<br>GT<br>NFHR.T       |                                             |
| PREDICTE<br>D:<br>desmoglei<br>n-4     | gij426253981 | 113.8 | 231.6  | 1,037 -<br>1,045 | 570.24  | 46.6  | R.YSNIHYSQQ.-                      |                                             |
|                                        |              |       |        | 1,019 -<br>1,031 | 675.8   | 48.4  | R.ISQTSSTSPV<br>TSR.<br>H          |                                             |
|                                        |              |       |        | 92 - 110         | 677.4   | 41.4  | R.ISGAGIDRPPY<br>GV<br>FTINPR.T    |                                             |
| PREDICTE<br>D: junction<br>plakoglobin | gij426238025 | 81.7  | 138.6  | 478 - 487        | 544.36  | 37.8  | R.LNYGIPAIVK.L                     |                                             |
|                                        |              |       |        | 638 - 651        | 742.37  | 77    | R.NEGTATYAAAV<br>L<br>R.I          |                                             |
| PREDICTE<br>D:<br>KAP13.1-<br>like     | gij426219157 | 19.6  | 267.9  | 34 - 40          | 434.73  | 40.7  | R.SLQDHLR.T                        |                                             |
|                                        |              |       |        | 128 - 137        | 551.74  | 62.7  | R.SCYSVGCGR.G                      | Carbamidomethyl:<br>2, 7                    |
|                                        |              |       |        | 116 - 127        | 601.25  | 66.9  | R.SSSCSSLSSGS<br>R.<br>S           | Carbamidomethyl:<br>4                       |
|                                        |              |       |        | 97 - 115         | 1054.46 | 97.7  | R.TSTFSSPCQT<br>TFP<br>GSLAYR.S    | Carbamidomethyl:<br>8                       |
| PREDICTE<br>D: K32                     | gij426238005 | 46    | 1117.9 | 133 - 139        | 404.19  | 58.2  | K.LAADDFR.S                        |                                             |
|                                        |              |       |        | 142 - 149        | 490.77  | 57.6  | K.YETELGLR.Q                       |                                             |
|                                        |              |       |        | 106 - 113        | 494.75  | 65.7  | K.TIEELQK.I                        |                                             |
|                                        |              |       |        | 239 - 246        | 541.3   | 53.4  | R.DVEEWFTR.Q                       |                                             |
|                                        |              |       |        | 162 - 170        | 552.86  | 72.8  | R.ILDELTLCK.A                      | Carbamidomethyl:<br>8                       |
|                                        |              |       |        | 140 - 149        | 598.29  | 56.6  | R.SKYETELGLR.Q                     |                                             |
|                                        |              |       |        | 106 - 115        | 607.91  | 45.3  | K.TIEELQKIL.Y                      |                                             |
|                                        |              |       |        | 161 - 170        | 630.86  | 48.8  | R.RILDELTLCK.A                     | Carbamidomethyl:<br>9                       |
|                                        |              |       |        | 292 - 303        | 682.35  | 92.2  | D.SLENTLTETEAR.Y                   |                                             |

|                 |              |      |        |           |        |       |                              |                                        |
|-----------------|--------------|------|--------|-----------|--------|-------|------------------------------|----------------------------------------|
|                 |              |      |        | 292 - 303 | 682.83 | 93.4  | D.SLENTLTETEAR.Y             | Deamidated: 4                          |
|                 |              |      |        | 291 - 303 | 739.83 | 110.7 | R.DSLENTLTETEAR.Y            |                                        |
|                 |              |      |        | 291 - 303 | 740.33 | 93.4  | R.DSLENTLTETEAR.Y            | Deamidated: 5                          |
|                 |              |      |        | 332 - 343 | 766.94 | 50.1  | R.QNQEYRVLLDVR.A             |                                        |
|                 |              |      |        | 303 - 326 | 909.07 | 31.5  | A.RYASQLAQMQL VTNVESQLAEIR.C | Oxidation: 9; Deamidated: 5, 8, 10, 15 |
| PREDICTE D: K20 | gij426237957 | 48.3 | 241.8  | 81 - 89   | 553.84 | 76.1  | R.LASYLERVR.S                |                                        |
|                 |              |      |        | 367 - 371 | 623.41 | 26.5  | E.IATYR.R                    |                                        |
| PREDICTE D: K40 | gij426237961 | 47.7 | 1095.6 | 169 - 175 | 404.19 | 58.2  | K.LAADDFR.S                  |                                        |
|                 |              |      |        | 100 - 106 | 412.26 | 59.2  | R.LASYLEK.V                  |                                        |
|                 |              |      |        | 384 - 390 | 478.25 | 29.6  | E.CEINTYR.G                  | Carbamidomethyl: 1                     |
|                 |              |      |        | 94 - 106  | 532.99 | 35.7  | M.QFLNDRLASYLEK.V            |                                        |
|                 |              |      |        | 100 - 108 | 539.81 | 79.8  | R.LASYLEKVR.G                |                                        |
|                 |              |      |        | 100 - 109 | 568.36 | 44    | R.LASYLEKVRG.L               |                                        |
|                 |              |      |        | 91 - 99   | 577.31 | 55.8  | K.ETMQFLNDR.L                |                                        |
|                 |              |      |        | 91 - 99   | 585.26 | 43.2  | K.ETMQFLNDR.L                | Oxidation: 3                           |
|                 |              |      |        | 382 - 390 | 599.28 | 65.1  | R.LECEINTYR.G                | Carbamidomethyl: 3                     |
|                 |              |      |        | 226 - 235 | 606.27 | 63.6  | K.SHEEEVNL.R.G               |                                        |
|                 |              |      |        | 370 - 379 | 619.33 | 33.6  | N.QEYQVLLDTK.A               | Deamidated: 4                          |
|                 |              |      |        | 91 - 106  | 653.36 | 52.6  | K.ETMQFLNDRLASYLEK.V         |                                        |
|                 |              |      |        | 380 - 390 | 712.85 | 62.6  | K.ARLECEINTYR.G              | Carbamidomethyl: 5                     |
|                 |              |      |        | 380 - 390 | 713.37 | 26.9  | K.ARLECEINTYR.G              | Carbamidomethyl: 5; Deamidated: 8      |
|                 |              |      |        | 91 - 108  | 738.38 | 25.2  | K.ETMQFLNDRLASYLEKVR.G       |                                        |
|                 |              |      |        | 91 - 108  | 743.7  | 47.6  | K.ETMQFLNDRLASYLEKVR.G       | Oxidation: 3                           |
|                 |              |      |        | 92 - 106  | 914.97 | 58.9  | E.TMQFLNDRLASYLEK.V          |                                        |
|                 |              |      |        | 91 - 106  | 980.04 | 40.1  | K.ETMQFLNDRLASYLEK.V         | Deamidated: 4                          |
| PREDICTE D: K83 | gij426226636 | 51.3 | 2049.7 | 39 - 44   | 378.16 | 25.6  | R.GISCYR.G                   | Carbamidomethyl: 4                     |
|                 |              |      |        | 122 - 128 | 406.22 | 56.2  | R.FAAFIDK.V                  |                                        |
|                 |              |      |        | 45 - 53   | 426.2  | 57.6  | R.GLTGGFGSR.S                |                                        |
|                 |              |      |        | 131 - 137 | 453.7  | 36.2  | R.FLEQQNK.L                  |                                        |
|                 |              |      |        | 396 - 407 | 473.95 | 71    | K.LGLDIEIATYRR.L             |                                        |
|                 |              |      |        | 331 - 339 | 487.74 | 51.9  | R.LTAEVENAK.C                |                                        |
|                 |              |      |        | 44 - 53   | 504.25 | 44.3  | Y.RGLTGGFGSR.S               |                                        |
|                 |              |      |        | 200 - 207 | 504.77 | 61.9  | K.YEEVALR.A                  |                                        |
|                 |              |      |        | 16 - 29   | 507.92 | 32.9  | R.AFSCVSACGPRPGR.C           | Carbamidomethyl: 4, 8                  |
|                 |              |      |        | 400 - 407 | 511.32 | 32.1  | D.IEATYRR.L                  |                                        |
|                 |              |      |        | 130 - 137 | 531.78 | 37    | V.RFLEQQNK.L                 |                                        |
|                 |              |      |        | 122 - 130 | 533.82 | 70    | R.FAAFIDKVR.F                |                                        |
|                 |              |      |        | 367 - 376 | 536.32 | 87.2  | K.LAGLEEALQK.A               |                                        |
|                 |              |      |        | 367 - 376 | 536.84 | 50.2  | K.LAGLEEALQK.A               | Deamidated: 9                          |
|                 |              |      |        | 30 - 38   | 556.25 | 66.8  | R.CCITAAPYR.G                | Carbamidomethyl: 1, 2                  |

|                         |              |      |        |           |        |       |                               |                                                       |
|-------------------------|--------------|------|--------|-----------|--------|-------|-------------------------------|-------------------------------------------------------|
|                         |              |      |        | 387 - 395 | 564.26 | 50.6  | K.EYQEVMSK.L                  |                                                       |
|                         |              |      |        | 330 - 339 | 565.8  | 31.6  | Q.RLTAEVENAK.C                |                                                       |
|                         |              |      |        | 199 - 207 | 568.79 | 71.5  | S.KYEEVEALR.A                 |                                                       |
|                         |              |      |        | 387 - 395 | 572.29 | 28.4  | K.EYQEVMSK.L                  | Oxidation: 6                                          |
|                         |              |      |        | 117 - 130 | 575.67 | 30.2  | K.CLNNRFAAFIDKV<br>R.F        | Carbamidomethyl:<br>1; Deamidated: 3                  |
|                         |              |      |        | 320 - 328 | 576.82 | 40.8  | K.EINELNCMI.Q                 | Carbamidomethyl:<br>7; Oxidation: 8;<br>Deamidated: 3 |
|                         |              |      |        | 129 - 137 | 581.28 | 37.6  | K.VRFLEQQNK.L                 |                                                       |
|                         |              |      |        | 377 - 386 | 589.26 | 52.1  | K.AKQDMACLK.E                 | Carbamidomethyl:<br>7                                 |
|                         |              |      |        | 366 - 376 | 600.36 | 95    | C.KLAGLEEALQK.A               |                                                       |
|                         |              |      |        | 208 - 218 | 603.85 | 50.6  | R.ATAENEFLALK.D               |                                                       |
|                         |              |      |        | 16 - 26   | 606.22 | 49.8  | R.AFSCVSACGPR.P               | Carbamidomethyl:<br>4, 8                              |
|                         |              |      |        | 402 - 406 | 623.41 | 26.5  | E.IATYR.R                     |                                                       |
|                         |              |      |        | 396 - 406 | 632.41 | 104.4 | K.LGLDIEIATYR.R               |                                                       |
|                         |              |      |        | 367 - 378 | 635.89 | 71.2  | K.LAGLEEALQKAK.<br>Q          |                                                       |
|                         |              |      |        | 365 - 376 | 680.39 | 86.6  | S.CKLAGLEEALQK.<br>A          | Carbamidomethyl:<br>1                                 |
|                         |              |      |        | 131 - 142 | 745.88 | 65.7  | R.FLEQQNKLETK.L               |                                                       |
|                         |              |      |        | 131 - 142 | 746.4  | 62.4  | R.FLEQQNKLETK.L               | Deamidated: 6                                         |
|                         |              |      |        | 367 - 380 | 757.39 | 52.2  | K.LAGLEEALQKAKQ<br>D.M        |                                                       |
|                         |              |      |        | 387 - 407 | 843.78 | 33.8  | K.EYQEVMSK.LGL<br>DIEIATYRR.L | Deamidated: 3                                         |
| PREDICTE<br>D: K84      | gij426224440 | 64.1 | 885.5  | 177 - 183 | 453.7  | 36.2  | R.FLEQQNK.L                   |                                                       |
|                         |              |      |        | 452 - 459 | 511.32 | 32.1  | D.IEATYRR.L                   |                                                       |
|                         |              |      |        | 383 - 391 | 519.8  | 38.2  | R.LKAEIEHAK.A                 |                                                       |
|                         |              |      |        | 176 - 183 | 531.78 | 37    | V.RFLEQQNK.L                  |                                                       |
|                         |              |      |        | 244 - 252 | 561.76 | 47.1  | K.KYEEVEGLR.A                 |                                                       |
|                         |              |      |        | 175 - 183 | 581.28 | 37.6  | K.VRFLEQQNK.L                 |                                                       |
|                         |              |      |        | 454 - 458 | 623.41 | 26.5  | E.IATYR.R                     |                                                       |
|                         |              |      |        | 448 - 458 | 639.38 | 58.8  | K.LALDIEIATYR.R               |                                                       |
|                         |              |      |        | 502 - 516 | 710.81 | 85.9  | R.GGVTVSGISSSSN<br>IR.S       |                                                       |
|                         |              |      |        | 177 - 188 | 745.88 | 65.7  | R.FLEQQNKLETK.<br>W           |                                                       |
|                         |              |      |        | 177 - 188 | 746.4  | 62.4  | R.FLEQQNKLETK.<br>W           | Deamidated: 6                                         |
|                         |              |      |        | 200 - 214 | 911.98 | 32.6  | K.SNLEPLFENYITNL<br>R.R       |                                                       |
| PREDICTE<br>D: K85-like | gij426226634 | 56.3 | 2430.9 | 149 - 155 | 406.22 | 56.2  | R.FAAFIDK.V                   |                                                       |
|                         |              |      |        | 373 - 380 | 408.74 | 36    | K.QQVALQAG.Q                  | Deamidated: 1, 2                                      |
|                         |              |      |        | 158 - 164 | 453.7  | 36.2  | R.FLEQQNK.L                   |                                                       |
|                         |              |      |        | 349 - 359 | 468.26 | 27    | R.RTKKEINELNR.V               | Deamidated: 7                                         |
|                         |              |      |        | 170 - 176 | 484.72 | 45.6  | K.LQFYQNR.Q                   |                                                       |
|                         |              |      |        | 170 - 176 | 485.26 | 47    | K.LQFYQNR.Q                   | Deamidated: 6                                         |
|                         |              |      |        | 364 - 372 | 487.74 | 51.9  | R.LTAEVENAK.Q                 |                                                       |
|                         |              |      |        | 312 - 320 | 490.74 | 47.8  | K.AQYDGIASR.S                 |                                                       |
|                         |              |      |        | 352 - 363 | 504.94 | 42.2  | K.EEINELNRVIQR.L              |                                                       |
|                         |              |      |        | 352 - 359 | 508.76 | 39.8  | K.EEINELNR.V                  |                                                       |
|                         |              |      |        | 157 - 164 | 531.78 | 37    | V.RFLEQQNK.L                  |                                                       |
|                         |              |      |        | 149 - 157 | 533.82 | 70    | R.FAAFIDKVR.F                 |                                                       |



|                    |              |    |        |           |        |      |                             |                                      |
|--------------------|--------------|----|--------|-----------|--------|------|-----------------------------|--------------------------------------|
|                    |              |    |        | 394 - 403 | 550.33 | 85.6 | K.LVGLLEEALQK.A             |                                      |
|                    |              |    |        | 414 - 422 | 564.26 | 50.6 | K.EYQEVMNSK.L               |                                      |
|                    |              |    |        | 363 - 372 | 565.8  | 31.6 | Q.RLTAEVENAK.Q              |                                      |
|                    |              |    |        | 414 - 422 | 572.29 | 28.4 | K.EYQEVMNSK.L               | Oxidation: 6                         |
|                    |              |    |        | 144 - 157 | 575.67 | 30.2 | K.CLNNRFAAFIDKV<br>R.F      | Carbamidomethyl:<br>1; Deamidated: 3 |
|                    |              |    |        | 156 - 164 | 581.28 | 37.6 | K.VRFLEQQNK.L               |                                      |
|                    |              |    |        | 350 - 363 | 581.35 | 47.6 | R.TKEEINELNRVIQR<br>.L      |                                      |
|                    |              |    |        | 350 - 363 | 581.63 | 72   | R.TKEEINELNRVIQR<br>.L      | Deamidated: 6                        |
|                    |              |    |        | 404 - 413 | 589.26 | 52.1 | K.AKQDMACLK.E               | Carbamidomethyl:<br>7                |
|                    |              |    |        | 81 - 90   | 596.35 | 60.6 | R.ISVSYAWPLR.G              |                                      |
|                    |              |    |        | 393 - 403 | 614.36 | 48.5 | C.KLVGLLEEALQK.A            |                                      |
|                    |              |    |        | 350 - 359 | 623.32 | 76.9 | R.TKEEINELNR.V              |                                      |
|                    |              |    |        | 429 - 433 | 623.41 | 26.5 | E.IATYR.K                   |                                      |
|                    |              |    |        | 350 - 359 | 623.82 | 62.6 | R.TKEEINELNR.V              | Deamidated: 6                        |
|                    |              |    |        | 197 - 207 | 627.73 | 42.1 | R.EAECMEADSGR.L             | Carbamidomethyl:<br>4                |
|                    |              |    |        | 81 - 98   | 658.32 | 52.4 | R.ISVSYAWPLRGG<br>GSFGYR.V  |                                      |
|                    |              |    |        | 423 - 434 | 689.39 | 40   | K.LGLDVEIATYRK.L            |                                      |
|                    |              |    |        | 45 - 58   | 694.84 | 97.6 | R.GFANGLAFHGGG<br>PR.G      | Deamidated: 4                        |
|                    |              |    |        | 349 - 359 | 701.36 | 74.6 | R.RTKEEINELNR.V             |                                      |
|                    |              |    |        | 45 - 59   | 723.33 | 33.1 | R.GFANGLAFHGGG<br>PRG.P     | Deamidated: 4                        |
|                    |              |    |        | 360 - 372 | 735.89 | 71   | R.VIQRLEVENAK.<br>Q         |                                      |
|                    |              |    |        | 158 - 169 | 745.88 | 65.7 | R.FLEQQNKLLETK.L            |                                      |
|                    |              |    |        | 158 - 169 | 746.4  | 62.4 | R.FLEQQNKLLETK.L            | Deamidated: 6                        |
|                    |              |    |        | 165 - 176 | 776.9  | 81.8 | K.LLETKLQFYQNR.<br>Q        |                                      |
|                    |              |    |        | 165 - 176 | 777.37 | 70.1 | K.LLETKLQFYQNR.<br>Q        | Deamidated: 7                        |
|                    |              |    |        | 178 - 196 | 791.05 | 41.4 | Q.CCESNLEPLFNGY<br>IETLRR.E | Carbamidomethyl:<br>1, 2             |
|                    |              |    |        | 457 - 472 | 801.9  | 91.8 | R.SQGGVICGDLGST<br>VPR.G    | Carbamidomethyl:<br>7                |
|                    |              |    |        | 158 - 176 | 814.09 | 74.5 | R.FLEQQNKLLETKL<br>QFYQNR.Q |                                      |
| PREDICTE<br>D: K86 | gij426224446 | 52 | 2709.6 | 115 - 121 | 406.22 | 56.2 | K.FAAFIDK.V                 |                                      |
|                    |              |    |        | 406 - 415 | 414.92 | 32.3 | R.RLLEGEEQRL.C              |                                      |
|                    |              |    |        | 463 - 471 | 445.77 | 98.2 | R.VGGSILGCK.K               | Carbamidomethyl:<br>8                |
|                    |              |    |        | 124 - 130 | 453.7  | 36.2 | R.FLEQQNK.L                 |                                      |
|                    |              |    |        | 315 - 325 | 468.26 | 27   | R.RTKEEINELNR.L             | Deamidated: 7                        |
|                    |              |    |        | 395 - 406 | 473.95 | 71   | K.LGLDIEIATYRR.L            |                                      |
|                    |              |    |        | 240 - 246 | 476.25 | 56.3 | T.LYEEELR.V                 |                                      |
|                    |              |    |        | 407 - 414 | 487.22 | 73.6 | R.LLEGEEQR.L                |                                      |
|                    |              |    |        | 330 - 338 | 494.77 | 55.4 | R.LTAEIENAK.S               |                                      |
|                    |              |    |        | 289 - 296 | 506.23 | 60.9 | R.AEAESWYR.S                |                                      |
|                    |              |    |        | 318 - 325 | 508.76 | 39.8 | K.EEINELNR.L                |                                      |
|                    |              |    |        | 399 - 406 | 511.32 | 32.1 | D.IEATYRR.L                 |                                      |
|                    |              |    |        | 278 - 286 | 531.23 | 51   | K.AHYDEIASR.S               |                                      |
|                    |              |    |        | 123 - 130 | 531.78 | 37   | V.RFLEQQNK.L                |                                      |
|                    |              |    |        | 115 - 123 | 533.82 | 70   | K.FAAFIDKVR.F               |                                      |

|      |           |    |        |           |        |       |                               |                           |
|------|-----------|----|--------|-----------|--------|-------|-------------------------------|---------------------------|
|      |           |    |        | 407 - 415 | 543.84 | 63.7  | R.LLEGEEQRL.C                 |                           |
|      |           |    |        | 406 - 414 | 565.27 | 56.7  | R.RLLEGEEQR.L                 |                           |
|      |           |    |        | 122 - 130 | 581.28 | 37.6  | K.VRFLEQQNK.L                 |                           |
|      |           |    |        | 316 - 329 | 586.36 | 39.8  | R.TKEEINELNRLIQR<br>.L        | Deamidated: 9             |
|      |           |    |        | 289 - 298 | 613.78 | 46.7  | R.AEAESWYRSK.Y                |                           |
|      |           |    |        | 316 - 325 | 623.32 | 76.9  | R.TKEEINELNR.L                |                           |
|      |           |    |        | 401 - 405 | 623.41 | 26.5  | E.IATYR.R                     |                           |
|      |           |    |        | 316 - 325 | 623.82 | 62.6  | R.TKEEINELNR.L                | Deamidated: 6             |
|      |           |    |        | 287 - 296 | 627.78 | 75.5  | R.SRAEAESWYR.S                |                           |
|      |           |    |        | 364 - 375 | 628.86 | 44.1  | R.GKLAGLEKALQK.<br>A          | Deamidated: 11            |
|      |           |    |        | 395 - 405 | 632.41 | 104.4 | K.LGLDIEIATYR.R               |                           |
|      |           |    |        | 174 - 190 | 653.39 | 35    | R.LASELNHVQEVLE<br>GYKK.K     | Deamidated: 6             |
|      |           |    |        | 174 - 191 | 695.71 | 37.6  | R.LASELNHVQEVLE<br>GYKKK.Y    |                           |
|      |           |    |        | 315 - 325 | 701.36 | 74.6  | R.RTKEEINELNR.L               |                           |
|      |           |    |        | 247 - 265 | 705.05 | 72.3  | R.VIQAHISDTSVIVK<br>MDNSR.Y   |                           |
|      |           |    |        | 266 - 277 | 706.39 | 47.6  | R.YLNMDSIVAEIK.A              | Oxidation: 4              |
|      |           |    |        | 124 - 135 | 745.88 | 65.7  | R.FLEQQNKLETK.<br>W           |                           |
|      |           |    |        | 124 - 135 | 746.4  | 62.4  | R.FLEQQNKLETK.<br>W           | Deamidated: 6             |
|      |           |    |        | 247 - 260 | 755.41 | 98.8  | R.VIQAHISDTSVIVK.<br>M        |                           |
|      |           |    |        | 240 - 260 | 814.75 | 41.6  | T.LYEEELRVIQAHIS<br>DTSVIVK.M |                           |
|      |           |    |        | 415 - 430 | 847.39 | 132.1 | R.LCEGVGAVNVCV<br>SSSR.G      | Carbamidomethyl:<br>2, 11 |
|      |           |    |        | 174 - 189 | 914.99 | 138.7 | R.LASELNHVQEVLE<br>GYK.K      |                           |
| K33a | gij125091 | 46 | 6112.6 | 136 - 144 | 351.5  | 44.4  | K.LASDDFRTK.Y                 |                           |
|      |           |    |        | 224 - 229 | 366.15 | 49.8  | H.VLNETR.A                    |                           |
|      |           |    |        | 224 - 229 | 366.71 | 34    | H.VLNETR.A                    | Deamidated: 3             |
|      |           |    |        | 8 - 13    | 367.25 | 36.7  | L.PNLSFR.S                    |                           |
|      |           |    |        | 136 - 142 | 412.18 | 62.1  | K.LASDDFR.T                   |                           |
|      |           |    |        | 67 - 73   | 412.26 | 59.2  | R.LASYLEK.V                   |                           |
|      |           |    |        | 7 - 13    | 423.77 | 40.4  | C.LPNLSFR.S                   |                           |
|      |           |    |        | 80 - 86   | 430.72 | 39.9  | R.ENAELER.R                   |                           |
|      |           |    |        | 250 - 256 | 431.23 | 28.2  | R.QTEELNK.Q                   |                           |
|      |           |    |        | 287 - 293 | 434.2  | 26.6  | L.QAQHNL.R.D                  | Deamidated: 5             |
|      |           |    |        | 351 - 357 | 478.25 | 29.6  | E.CEINTYR.G                   | Carbamidomethyl:<br>1     |
|      |           |    |        | 230 - 241 | 483.92 | 67.4  | R.AQYEALVETNRR.<br>D          |                           |
|      |           |    |        | 230 - 241 | 484.24 | 62.8  | R.AQYEALVETNRR.<br>D          | Deamidated: 10            |
|      |           |    |        | 109 - 116 | 494.75 | 65.7  | R.TIEELQQK.I                  |                           |
|      |           |    |        | 243 - 249 | 497.78 | 53.5  | D.VEEWYIR.Q                   |                           |
|      |           |    |        | 145 - 152 | 498.76 | 61    | K.YETEVSRLR.Q                 |                           |
|      |           |    |        | 191 - 202 | 499.22 | 32.6  | L.KQNHEQEVNTLR.<br>S          |                           |
|      |           |    |        | 127 - 135 | 500.33 | 75.6  | R.LVVQIDNAK.L                 |                           |
|      |           |    |        | 127 - 135 | 500.81 | 60.4  | R.LVVQIDNAK.L                 | Deamidated: 7             |
|      |           |    |        | 127 - 135 | 500.84 | 51.4  | R.LVVQIDNAK.L                 | Deamidated: 4             |
|      |           |    |        | 217 - 229 | 503.31 | 47.5  | A.PTVDLNHVLNETR<br>.A         |                           |

|  |  |  |  |           |        |      |                            |                          |
|--|--|--|--|-----------|--------|------|----------------------------|--------------------------|
|  |  |  |  | 6 - 13    | 503.79 | 55.7 | F.CLPNLSFR.S               | Carbamidomethyl:<br>1    |
|  |  |  |  | 76 - 87   | 514.93 | 30.3 | R.QLERENAELERR.I           |                          |
|  |  |  |  | 180 - 188 | 530.37 | 41.5 | R.VESLKEELI.C              |                          |
|  |  |  |  | 61 - 73   | 532.99 | 35.7 | M.QFLNDRLASYLEK<br>.V      |                          |
|  |  |  |  | 190 - 202 | 536.94 | 62   | C.LKQNHQEVNTL<br>R.S       |                          |
|  |  |  |  | 101 - 108 | 537.8  | 63.7 | C.PNYQSYFR.T               |                          |
|  |  |  |  | 67 - 75   | 539.81 | 79.8 | R.LASYLEKVR.Q              |                          |
|  |  |  |  | 1 - 13    | 544.94 | 31.5 | -<br>.MSFNFCPLNLSFR.<br>S  | Carbamidomethyl:<br>6    |
|  |  |  |  | 396 - 404 | 546.24 | 56.8 | R.CGPCNTFVH.-              | Carbamidomethyl:<br>1, 4 |
|  |  |  |  | 74 - 86   | 547.99 | 34.1 | K.VRQLERENAELER<br>.R      |                          |
|  |  |  |  | 221 - 229 | 548.29 | 55.7 | D.LNHVLNETR.A              |                          |
|  |  |  |  | 221 - 229 | 548.82 | 37.3 | D.LNHVLNETR.A              | Deamidated: 2            |
|  |  |  |  | 165 - 173 | 552.86 | 72.8 | R.ILDELTLCK.S              | Carbamidomethyl:<br>8    |
|  |  |  |  | 242 - 249 | 555.31 | 65.2 | R.DVEEWYIR.Q               |                          |
|  |  |  |  | 194 - 202 | 563.26 | 58   | N.HEQEVNTRLR.S             |                          |
|  |  |  |  | 108 - 116 | 572.81 | 31.4 | F.RTIEELQQK.I              |                          |
|  |  |  |  | 58 - 66   | 577.31 | 55.8 | K.ETMQFLNDR.L              |                          |
|  |  |  |  | 5 - 13    | 577.34 | 40.8 | N.FCLPNLSFR.S              | Carbamidomethyl:<br>2    |
|  |  |  |  | 335 - 348 | 578    | 44.8 | R.QNQEQVLLDVR<br>AR.L      |                          |
|  |  |  |  | 126 - 135 | 578.29 | 65.7 | A.RLVVQIDNAK.L             |                          |
|  |  |  |  | 58 - 66   | 585.26 | 43.2 | K.ETMQFLNDR.L              | Oxidation: 3             |
|  |  |  |  | 349 - 357 | 599.28 | 65.1 | R.LECEINTYR.G              | Carbamidomethyl:<br>3    |
|  |  |  |  | 284 - 293 | 604.32 | 62.1 | E.VELQAQHNL.R.D            |                          |
|  |  |  |  | 109 - 118 | 607.91 | 45.3 | R.TIEELQQKIL.C             |                          |
|  |  |  |  | 143 - 152 | 613.31 | 70.7 | R.TKYETEVSRLR.Q            |                          |
|  |  |  |  | 153 - 163 | 614.36 | 63.6 | R.QLVEADLNGLR.R            |                          |
|  |  |  |  | 153 - 163 | 614.86 | 66.3 | R.QLVEADLNGLR.R            | Deamidated: 8            |
|  |  |  |  | 164 - 173 | 630.86 | 48.8 | R.RILDELTLCK.S             | Carbamidomethyl:<br>9    |
|  |  |  |  | 241 - 249 | 633.34 | 53.4 | R.RDVEEWYIR.Q              |                          |
|  |  |  |  | 4 - 13    | 634.36 | 28   | F.NFCLPNLSFR.S             | Carbamidomethyl:<br>3    |
|  |  |  |  | 230 - 240 | 647.34 | 94.9 | R.AQYEALVETNR.R            |                          |
|  |  |  |  | 230 - 240 | 647.85 | 79.2 | R.AQYEALVETNR.R            | Deamidated: 2            |
|  |  |  |  | 242 - 256 | 651.34 | 43   | R.DVEEWYIRQTEEL<br>NK.Q    |                          |
|  |  |  |  | 58 - 73   | 653.36 | 52.6 | K.ETMQFLNDRLASYLEK.V       |                          |
|  |  |  |  | 277 - 293 | 664.36 | 92.1 | R.RTVNALEVELQAQ<br>HNL.R.D |                          |
|  |  |  |  | 277 - 293 | 664.7  | 60.2 | R.RTVNALEVELQAQ<br>HNL.R.D | Deamidated: 4            |
|  |  |  |  | 290 - 306 | 667.32 | 33.3 | Q.HNLRDSLENTLTE<br>TEAR.Y  | Deamidated: 2            |
|  |  |  |  | 203 - 214 | 672.83 | 73.9 | R.SQLGDRLNVEVD.<br>A       |                          |
|  |  |  |  | 136 - 152 | 677.36 | 43.3 | K.LASDDFRTKYETE<br>VSLR.Q  |                          |
|  |  |  |  | 295 - 306 | 682.35 | 92.2 | D.SLENTLTETEAR.Y           |                          |

|  |  |  |  |           |        |       |                                |                                      |
|--|--|--|--|-----------|--------|-------|--------------------------------|--------------------------------------|
|  |  |  |  | 295 - 306 | 682.83 | 93.4  | D.SLENTLTETEAR.Y               | Deamidated: 4                        |
|  |  |  |  | 192 - 202 | 684.3  | 67.9  | K.QNHEQEVTNLR.S                |                                      |
|  |  |  |  | 192 - 202 | 684.84 | 40    | K.QNHEQEVTNLR.S                | Deamidated: 1                        |
|  |  |  |  | 192 - 202 | 685.8  | 40.8  | K.QNHEQEVTNLR.S                | Deamidated: 1, 2, 5                  |
|  |  |  |  | 142 - 152 | 691.32 | 35.8  | F.RTKYETEVSRLR.Q               |                                      |
|  |  |  |  | 153 - 164 | 692.39 | 30.4  | R.QLVEADLNGLRR.I               |                                      |
|  |  |  |  | 330 - 346 | 702.39 | 63.1  | R.SDLERQNQEYQV<br>LLDVR.A      |                                      |
|  |  |  |  | 109 - 126 | 706.35 | 38.6  | R.TIEELQQKILCGKS<br>ENAR.L     | Carbamidomethyl:<br>11               |
|  |  |  |  | 347 - 357 | 712.85 | 62.6  | R.ARLECEINTYR.G                | Carbamidomethyl:<br>5                |
|  |  |  |  | 347 - 357 | 713.37 | 26.9  | R.ARLECEINTYR.G                | Carbamidomethyl:<br>5; Deamidated: 8 |
|  |  |  |  | 224 - 241 | 721.34 | 43    | H.VLNETRAQEALV<br>ETNRR.D      |                                      |
|  |  |  |  | 224 - 241 | 721.68 | 40.6  | H.VLNETRAQEALV<br>ETNRR.D      | Deamidated: 8                        |
|  |  |  |  | 180 - 191 | 730.9  | 71.8  | R.VESLKEELICKLQ                | Carbamidomethyl:<br>10               |
|  |  |  |  | 58 - 75   | 738.38 | 25.2  | K.ETMQFLNDRLAS<br>Y<br>LEKVR.Q |                                      |
|  |  |  |  | 294 - 306 | 739.83 | 110.7 | R.DSLENTLTETEAR.<br>Y          |                                      |
|  |  |  |  | 294 - 306 | 740.33 | 93.4  | R.DSLENTLTETEAR.<br>Y          | Deamidated: 5                        |
|  |  |  |  | 58 - 75   | 743.7  | 47.6  | K.ETMQFLNDRLAS<br>Y<br>LEKVR.Q | Oxidation: 3                         |
|  |  |  |  | 335 - 346 | 752.9  | 100.1 | R.QNQEYQVLLDVR.<br>A           |                                      |
|  |  |  |  | 335 - 346 | 753.43 | 73    | R.QNQEYQVLLDVR.<br>A           | Deamidated: 3                        |
|  |  |  |  | 203 - 223 | 755.39 | 32.1  | R.SQLGDRLNVEVD<br>AAPTVDLNH.V  | Deamidated: 20                       |
|  |  |  |  | 281 - 293 | 760.89 | 94.7  | N.ALEVELQAQHNL<br>R<br>.D      |                                      |
|  |  |  |  | 209 - 229 | 773.74 | 38.4  | R.LNVEVDAAPTVDL<br>NHVLNETR.A  |                                      |
|  |  |  |  | 209 - 229 | 774.06 | 42.6  | R.LNVEVDAAPTVDL<br>NHVLNETR.A  | Deamidated: 18                       |
|  |  |  |  | 209 - 229 | 774.1  | 33.5  | R.LNVEVDAAPTVDL<br>NHVLNETR.A  | Deamidated: 2                        |
|  |  |  |  | 209 - 229 | 774.4  | 25.5  | R.LNVEVDAAPTVDL<br>NHVLNETR.A  | Deamidated: 2, 18                    |
|  |  |  |  | 209 - 223 | 804.39 | 79.6  | R.LNVEVDAAPTVDL<br>NH.V        | Deamidated: 14                       |
|  |  |  |  | 215 - 229 | 825.43 | 119.6 | D.AAPTVDLNHVLNE<br>TR.A        |                                      |
|  |  |  |  | 208 - 229 | 825.79 | 70.3  | D.RLNVEVDAAPTVD<br>LNHVLNETR.A |                                      |
|  |  |  |  | 215 - 229 | 825.92 | 78.4  | D.AAPTVDLNHVLNE<br>TR.A        | Deamidated: 8                        |
|  |  |  |  | 59 - 73   | 914.97 | 58.9  | E.TMQFLNDRLAS<br>Y<br>LEK.V    |                                      |
|  |  |  |  | 278 - 293 | 917.99 | 134.1 | R.TVNALEVELQAQH<br>NLR.D       |                                      |
|  |  |  |  | 278 - 293 | 918.47 | 105.8 | R.TVNALEVELQAQH<br>NLR.D       | Deamidated: 10                       |
|  |  |  |  | 278 - 293 | 918.49 | 119.9 | R.TVNALEVELQAQH<br>NLR.D       | Deamidated: 3                        |
|  |  |  |  | 278 - 294 | 975.48 | 70.7  | R.TVNALEVELQAQH<br>NLRD.S      |                                      |
|  |  |  |  | 58 - 73   | 980.04 | 40.1  | K.ETMQFLNDRLAS<br>Y            | Deamidated: 4                        |

|     |           |      |      |           |         |      |                                           |                          |
|-----|-----------|------|------|-----------|---------|------|-------------------------------------------|--------------------------|
|     |           |      |      |           |         |      | LEK.V                                     |                          |
|     |           |      |      | 203 - 229 | 993.14  | 82.9 | R.SQLGDRLNVEVD<br>AAPTVDLNVHVLNET<br>R.A  | Deamidated: 2, 8         |
|     |           |      |      | 92 - 108  | 1072.49 | 72   | R.SQQQEPLVCPNY<br>QSYFR.T                 | Carbamidomethyl:<br>9    |
|     |           |      |      | 278 - 306 | 1099.18 | 29.1 | R.TVNALEVELQAQH<br>NLRDSLENTLTETEA<br>R.Y | Deamidated: 14           |
| K85 | gj 246276 | 56.3 | 5976 | 33 - 39   | 389.21  | 25.1 | C.ISAAPYR.G                               |                          |
|     |           |      |      | 133 - 139 | 406.22  | 56.2 | R.FAAFIDK.V                               |                          |
|     |           |      |      | 424 - 433 | 414.92  | 32.3 | R.RLLEGEEQRL.C                            |                          |
|     |           |      |      | 64 - 71   | 453.25  | 36.5 | P.RIAVSGFR.A                              |                          |
|     |           |      |      | 142 - 148 | 453.7   | 36.2 | R.FLEQQNK.L                               |                          |
|     |           |      |      | 333 - 343 | 468.26  | 27   | R.RTKEEINELNR.V                           | Deamidated: 7            |
|     |           |      |      | 32 - 39   | 469.26  | 44   | C.CISAAPYR.G                              | Carbamidomethyl:<br>1    |
|     |           |      |      | 413 - 424 | 473.95  | 71   | K.LGLDIEIATYRR.L                          |                          |
|     |           |      |      | 425 - 432 | 487.22  | 73.6 | R.LLEGEEQR.L                              |                          |
|     |           |      |      | 7 - 15    | 490.28  | 25.7 | R.ISPGYSVTR.T                             |                          |
|     |           |      |      | 348 - 356 | 494.77  | 55.4 | R.LTAEIENAK.C                             |                          |
|     |           |      |      | 210 - 217 | 504.77  | 61.9 | K.YEEEVALR.A                              |                          |
|     |           |      |      | 336 - 347 | 504.94  | 42.2 | K.EEINELNRVIQR.L                          |                          |
|     |           |      |      | 307 - 314 | 506.23  | 60.9 | R.AEAEWYR.S                               |                          |
|     |           |      |      | 230 - 237 | 506.27  | 43   | K.DVDCAYLR.K                              | Carbamidomethyl:<br>4    |
|     |           |      |      | 336 - 343 | 508.76  | 39.8 | K.EEINELNR.V                              |                          |
|     |           |      |      | 417 - 424 | 511.32  | 32.1 | D.IEATYRR.L                               |                          |
|     |           |      |      | 296 - 304 | 519.76  | 74.8 | K.AQYDDIASR.S                             |                          |
|     |           |      |      | 489 - 498 | 523.16  | 55   | R.ASSFSCGSSR.S                            | Carbamidomethyl:<br>6    |
|     |           |      |      | 141 - 148 | 531.78  | 37   | V.RFLEQQNK.L                              |                          |
|     |           |      |      | 133 - 141 | 533.82  | 70   | R.FAAFIDKVR.F                             |                          |
|     |           |      |      | 454 - 464 | 535.25  | 59.7 | C.GGLTYSSTAGR.Q                           |                          |
|     |           |      |      | 384 - 393 | 536.32  | 87.2 | K.LAGLEEALQK.A                            |                          |
|     |           |      |      | 384 - 393 | 536.84  | 50.2 | K.LAGLEEALQK.A                            | Deamidated: 9            |
|     |           |      |      | 425 - 433 | 543.84  | 63.7 | R.LLEGEEQRL.C                             |                          |
|     |           |      |      | 54 - 64   | 545.79  | 85.8 | R.SVSALGSCGPR.I                           | Carbamidomethyl:<br>8    |
|     |           |      |      | 31 - 39   | 549.19  | 57.8 | R.CCISAAPYR.G                             | Carbamidomethyl:<br>1, 2 |
|     |           |      |      | 404 - 412 | 564.26  | 50.6 | K.EYQEVMSK.L                              |                          |
|     |           |      |      | 424 - 432 | 565.27  | 56.7 | R.RLLEGEEQR.L                             |                          |
|     |           |      |      | 6 - 15    | 568.29  | 35.2 | Y.RISPGYSVTR.T                            |                          |
|     |           |      |      | 209 - 217 | 568.79  | 71.5 | K.KYEEEVALR.A                             |                          |
|     |           |      |      | 230 - 238 | 570.28  | 26.4 | K.DVDCAYLRK.S                             | Carbamidomethyl:<br>4    |
|     |           |      |      | 404 - 412 | 572.29  | 28.4 | K.EYQEVMSK.L                              | Oxidation: 6             |
|     |           |      |      | 16 - 26   | 577.76  | 62   | R.TFSSCAVAPK.T                            | Carbamidomethyl:<br>5    |
|     |           |      |      | 140 - 148 | 581.28  | 37.6 | K.VRFLEQQNK.L                             |                          |
|     |           |      |      | 334 - 347 | 581.35  | 47.6 | R.TKEEINELNRVIQR<br>.L                    |                          |
|     |           |      |      | 334 - 347 | 581.63  | 72   | R.TKEEINELNRVIQR<br>.L                    | Deamidated: 6            |
|     |           |      |      | 154 - 161 | 585.27  | 49   | K.WQFYQNQR.C                              |                          |
|     |           |      |      | 154 - 161 | 585.79  | 43.6 | K.WQFYQNQR.C                              | Deamidated: 6            |

|  |  |  |  |           |        |       |                                  |                                     |
|--|--|--|--|-----------|--------|-------|----------------------------------|-------------------------------------|
|  |  |  |  | 394 - 403 | 589.26 | 52.1  | K.AKQDMACLLK.E                   | Carbamidomethyl:<br>7               |
|  |  |  |  | 181 - 191 | 600.26 | 75.6  | R.EAEHVEADSGR.L                  |                                     |
|  |  |  |  | 383 - 393 | 600.36 | 95    | S.KLAGLEEALQK.A                  |                                     |
|  |  |  |  | 218 - 228 | 610.85 | 81.9  | R.ATAENEFVVLK.K                  |                                     |
|  |  |  |  | 307 - 316 | 613.78 | 46.7  | R.AEAESWYRSK.C                   |                                     |
|  |  |  |  | 334 - 343 | 623.32 | 76.9  | R.TKEEINELNR.V                   |                                     |
|  |  |  |  | 419 - 423 | 623.41 | 26.5  | E.IATYR.R                        |                                     |
|  |  |  |  | 334 - 343 | 623.82 | 62.6  | R.TKEEINELNR.V                   | Deamidated: 6                       |
|  |  |  |  | 305 - 314 | 627.78 | 75.5  | R.SRAEAESWYR.S                   |                                     |
|  |  |  |  | 413 - 423 | 632.41 | 104.4 | K.LGLDIEIATYR.R                  |                                     |
|  |  |  |  | 208 - 217 | 632.85 | 60.6  | K.KKYEEVALR.A                    |                                     |
|  |  |  |  | 384 - 395 | 635.89 | 71.2  | K.LAGLEEALQKAK.<br>Q             |                                     |
|  |  |  |  | 296 - 306 | 641.3  | 56.1  | K.AQYDDIASRSR.A                  |                                     |
|  |  |  |  | 382 - 393 | 643.88 | 106   | R.SKLAGLEEALQK.<br>A             |                                     |
|  |  |  |  | 192 - 208 | 653.39 | 35    | R.LASELDHVQEVLE<br>GYKK.K        |                                     |
|  |  |  |  | 239 - 256 | 670.04 | 33.9  | K.SDLEANVEALVEE<br>SNFLK.R       | Deamidated: 15                      |
|  |  |  |  | 218 - 229 | 674.87 | 85    | R.ATAENEFVVLKK.<br>D             |                                     |
|  |  |  |  | 218 - 229 | 675.39 | 69.4  | R.ATAENEFVVLKK.<br>D             | Deamidated: 5                       |
|  |  |  |  | 333 - 343 | 701.36 | 74.6  | R.RTKEEINELNR.V                  |                                     |
|  |  |  |  | 450 - 464 | 728.82 | 74    | G.GVACGGLTYSST<br>AGR.Q          | Carbamidomethyl:<br>4               |
|  |  |  |  | 315 - 326 | 734.37 | 57.1  | R.SKCEEMKATVIR.<br>H             | Carbamidomethyl:<br>3; Oxidation: 6 |
|  |  |  |  | 382 - 395 | 743.44 | 74.7  | R.SKLAGLEEALQKA<br>K.Q           |                                     |
|  |  |  |  | 142 - 153 | 745.88 | 65.7  | R.FLEQQNKLETK.<br>W              |                                     |
|  |  |  |  | 142 - 153 | 746.4  | 62.4  | R.FLEQQNKLETK.<br>W              | Deamidated: 6                       |
|  |  |  |  | 449 - 464 | 757.33 | 96    | R.GGVACGGLTYSS<br>TAGR.Q         | Carbamidomethyl:<br>5               |
|  |  |  |  | 384 - 397 | 757.39 | 52.2  | K.LAGLEEALQKAKQ<br>D.M           |                                     |
|  |  |  |  | 360 - 381 | 762.71 | 74.2  | R.TKLEAAVAEAEQQ<br>GEEALNDAR.S   | Deamidated: 13                      |
|  |  |  |  | 238 - 257 | 764.44 | 84.2  | R.KSDLEANVEALVE<br>ESNFLKR.L     |                                     |
|  |  |  |  | 238 - 257 | 764.77 | 33.8  | R.KSDLEANVEALVE<br>ESNFLKR.L     | Deamidated: 16                      |
|  |  |  |  | 162 - 180 | 791.05 | 41.4  | R.CCESNLEPLFNGY<br>IETLRR.E      | Carbamidomethyl:<br>1, 2            |
|  |  |  |  | 465 - 488 | 794.71 | 79.9  | R.QIASGPVATGGSI<br>TVLAPDSCQPR.A | Carbamidomethyl:<br>21              |
|  |  |  |  | 258 - 278 | 800.78 | 45.9  | R.LYDEEIQILNAHIS<br>DTSVIVK.M    |                                     |
|  |  |  |  | 218 - 232 | 839.44 | 34.3  | R.ATAENEFVVLKGD<br>VD.C          |                                     |
|  |  |  |  | 404 - 424 | 843.78 | 33.8  | K.EYQEVMSKLG<br>L DIEIATYRR.L    | Deamidated: 3                       |
|  |  |  |  | 433 - 448 | 855.36 | 126.5 | R.LCEGVGSVNVCV<br>SSSR.G         | Carbamidomethyl:<br>2, 11           |
|  |  |  |  | 149 - 161 | 877.43 | 88    | K.LLETKWQFYQ<br>NQ R.C           |                                     |
|  |  |  |  | 142 - 161 | 881.08 | 57.1  | R.FLEQQNKLETK<br>W QFYQNQR.C     |                                     |

|  |  |  |  |           |         |       |                                |                |
|--|--|--|--|-----------|---------|-------|--------------------------------|----------------|
|  |  |  |  | 239 - 256 | 1004.01 | 115.6 | K.SDLEANVEALVEE<br>SNFLK.R     |                |
|  |  |  |  | 362 - 381 | 1028.51 | 158.4 | K.LEAAVAEAEQQG<br>EAALNDAR.S   |                |
|  |  |  |  | 238 - 256 | 1068.04 | 129.9 | R.KSDLEANVEALVE<br>ESNFLK.R    |                |
|  |  |  |  | 239 - 257 | 1082.11 | 92.1  | K.SDLEANVEALVEE<br>SNFLKR.L    |                |
|  |  |  |  | 360 - 381 | 1143.05 | 172.5 | R.TKLEAAVAEAEQQ<br>GEAALNDAR.S |                |
|  |  |  |  | 360 - 381 | 1143.54 | 74.3  | R.TKLEAAVAEAEQQ<br>GEAALNDAR.S | Deamidated: 19 |
