# Supplementary material for: Ionic liquid-assisted extraction of wool keratin proteins as an aid to MS identification
Source: Royal Society of Chemistry journal article supplement (doi:10.1039/c4ay01251h), 2014-01-01
Supplement: c4ay01251h6.pdf [file c4ay01251h6.pdf]

**Supplementary Table 6. Proteins and peptides identified in Ionic Liquid/(Urea/thourea) extract  
Fraction 3.**

| Protein   | Accession    | Mol Wgt (kDa) | Protein Score    | Range     | m/z meas. | Peptide score | Sequence                  | Modifications          |        |      |                    |                    |
|-----------|--------------|---------------|------------------|-----------|-----------|---------------|---------------------------|------------------------|--------|------|--------------------|--------------------|
| K86-like  | gij312283584 | 53.2          | 2252.9           | 117 - 123 | 406.22    | 56.2          | R.FAAFIDK.V               |                        |        |      |                    |                    |
|           |              |               |                  | 40 - 48   | 426.25    | 57.8          | R.GLTGGFGSR.S             |                        |        |      |                    |                    |
|           |              |               |                  | 126 - 132 | 453.7     | 36.2          | R.FLEQQNK.L               |                        |        |      |                    |                    |
|           |              |               |                  | 317 - 327 | 467.87    | 55.7          | R.RTKKEINELNR.V           |                        |        |      |                    |                    |
|           |              |               |                  | 397 - 408 | 473.95    | 34.5          | K.LGLDIEIATYRR.L          |                        |        |      |                    |                    |
|           |              |               |                  | 242 - 248 | 476.25    | 47.7          | R.LYEEEEIR.V              |                        |        |      |                    |                    |
|           |              |               |                  | 138 - 144 | 485.26    | 47            | K.LQFYQNR.Q               | Deamidated: 6          |        |      |                    |                    |
|           |              |               |                  | 409 - 416 | 487.24    | 67.5          | R.LLEGEEQR.L              |                        |        |      |                    |                    |
|           |              |               |                  | 291 - 298 | 506.26    | 55.1          | R.AEAESWYR.S              |                        |        |      |                    |                    |
|           |              |               |                  | 194 - 201 | 511.76    | 62.3          | R.YEEEEIALR.A             |                        |        |      |                    |                    |
|           |              |               |                  | 280 - 288 | 524.24    | 43.4          | K.AHYDDIASR.S             |                        |        |      |                    |                    |
|           |              |               |                  | 117 - 125 | 533.86    | 67            | R.FAAFIDKVR.F             |                        |        |      |                    |                    |
|           |              |               |                  | 368 - 377 | 536.36    | 67.4          | K.LAGLEELQK.A             |                        |        |      |                    |                    |
|           |              |               |                  | 155 - 163 | 543.34    | 67            | L.FSGYIETLR.R             |                        |        |      |                    |                    |
|           |              |               |                  | 409 - 417 | 543.8     | 26.3          | R.LLEGEEQRL.C             |                        |        |      |                    |                    |
|           |              |               |                  | 241 - 248 | 554.31    | 49.8          | R.RLYEEEEIR.V             |                        |        |      |                    |                    |
|           |              |               |                  | 25 - 33   | 556.26    | 67.9          | R.CCITAAPYR.G             | Carbamidomethyl: 1, 2  |        |      |                    |                    |
|           |              |               |                  | 408 - 416 | 565.3     | 41.8          | R.RLLEGEEQR.L             |                        |        |      |                    |                    |
|           |              |               |                  |           |           |               |                           | 214 - 222              | 570.28 | 26.4 | K.DVDCAYLK.S       | Carbamidomethyl: 4 |
|           |              |               |                  |           |           |               |                           | 318 - 331              | 581.35 | 47.6 | R.TKEEINELNRVIQR.L |                    |
| 202 - 212 | 596.81       | 74.9          | R.ATAENEFVALK.K  |           |           |               |                           |                        |        |      |                    |                    |
| 165 - 175 | 597.71       | 68.3          | R.EAECAEADSGR.L  |           |           |               |                           | Carbamidomethyl: 4     |        |      |                    |                    |
| 318 - 327 | 623.32       | 49.7          | R.TKEEINELNR.V   |           |           |               |                           |                        |        |      |                    |                    |
| 289 - 298 | 627.78       | 75.5          | R.SRAEAESWYR.S   |           |           |               |                           |                        |        |      |                    |                    |
| 397 - 407 | 632.34       | 88            | K.LGLDIEIATYR.R  |           |           |               |                           |                        |        |      |                    |                    |
| 323 - 327 | 645.35       | 27.1          | I.NELNR.V        |           |           |               |                           |                        |        |      |                    |                    |
| 202 - 213 | 660.85       | 62            | R.ATAENEFVALKK.D |           |           |               |                           |                        |        |      |                    |                    |
| 366 - 377 | 680.39       | 86.6          | K.CKLAGLEELQK.A  |           |           |               |                           | Carbamidomethyl: 1     |        |      |                    |                    |
|           |              |               |                  | 176 - 193 | 698.36    | 34.1          | R.LSSELNSLQEVLEG YKKR.Y   |                        |        |      |                    |                    |
|           |              |               |                  | 8 - 21    | 739.81    | 113.2         | R.AVPAFSCVSACGPR .P       | Carbamidomethyl: 7, 11 |        |      |                    |                    |
|           |              |               |                  | 126 - 137 | 745.91    | 55            | R.FLEQQNKLLETK.L          |                        |        |      |                    |                    |
|           |              |               |                  | 249 - 262 | 755.39    | 49            | R.VLQAHISDTSVIVK. M       |                        |        |      |                    |                    |
|           |              |               |                  | 221 - 240 | 783.05    | 67.6          | L.RKSDLEANVEALIQE TDFLR.R |                        |        |      |                    |                    |
| K33b      | gij999000012 | 45.9          | 2737.2           | 417 - 432 | 847.39    | 132.1         | R.LCEGVGAVNVCVS SSR.G     | Carbamidomethyl: 2, 11 |        |      |                    |                    |
|           |              |               |                  | 223 - 228 | 366.17    | 46.8          | R.VLNETR.A                |                        |        |      |                    |                    |
|           |              |               |                  | 216 - 222 | 407.71    | 32.9          | A.PTVDLNR.V               |                        |        |      |                    |                    |
|           |              |               |                  | 66 - 72   | 412.24    | 44.1          | R.LASYLEK.V               |                        |        |      |                    |                    |
|           |              |               |                  | 102 - 107 | 432.21    | 33.2          | N.YQSYFR.T                |                        |        |      |                    |                    |
|           |              |               |                  | 229 - 240 | 483.9     | 50.6          | R.AQYEALVETNRR.D          |                        |        |      |                    |                    |
| 144 - 151 | 490.32       | 56.8          | K.YQTELGRLR.Q    |           |           |               |                           |                        |        |      |                    |                    |
| 126 - 134 | 500.33       | 75.6          | R.LVVQIDNAK.L    |           |           |               |                           |                        |        |      |                    |                    |

|     |              |      |        |           |         |       |                                 |                       |
|-----|--------------|------|--------|-----------|---------|-------|---------------------------------|-----------------------|
|     |              |      |        | 338 - 345 | 503.31  | 30.6  | E.YQVLLDVR.A                    |                       |
|     |              |      |        | 280 - 292 | 507.6   | 65.1  | N.ALEVELQAQHNLR.D               |                       |
|     |              |      |        | 135 - 143 | 518.77  | 51.3  | K.LAADDFRTK.Y                   |                       |
|     |              |      |        | 60 - 72   | 532.99  | 35.7  | M.QFLNDRLASYLEK.V               |                       |
|     |              |      |        | 231 - 239 | 547.79  | 31.6  | Q.YEALVETNR.R                   |                       |
|     |              |      |        | 116 - 125 | 550.81  | 58.4  | K.ILANKAENAR.L                  | Deamidated: 4         |
|     |              |      |        | 241 - 248 | 555.31  | 53.7  | R.DVEEWYIR.Q                    |                       |
|     |              |      |        | 348 - 356 | 562.78  | 63.4  | R.LESEINTYR.G                   |                       |
|     |              |      |        | 348 - 356 | 563.28  | 36.9  | R.LESEINTYR.G                   | Deamidated: 6         |
|     |              |      |        | 107 - 115 | 572.81  | 29.4  | F.RTIEELQQK.I                   |                       |
|     |              |      |        | 334 - 347 | 578     | 44.8  | R.QNQEQVLLDVRA<br>R.L           |                       |
|     |              |      |        | 142 - 151 | 605.35  | 65.6  | R.TKYQTELGRL.Q                  | Deamidated: 4         |
|     |              |      |        | 152 - 162 | 622.87  | 48.1  | R.QLVESDINGLR.R                 | Deamidated: 8         |
|     |              |      |        | 152 - 162 | 623.35  | 38.4  | R.QLVESDINGLR.R                 | Deamidated: 1, 8      |
|     |              |      |        | 163 - 172 | 630.86  | 48.8  | R.RILDELTLCK.S                  | Carbamidomethyl:<br>9 |
|     |              |      |        | 240 - 248 | 633.28  | 51    | R.RDVEEWYIR.Q                   |                       |
|     |              |      |        | 229 - 239 | 647.33  | 90.4  | R.AQYEALVETNR.R                 |                       |
|     |              |      |        | 276 - 292 | 664.7   | 60.2  | R.RTVNALEVELQAQH<br>NLR.D       | Deamidated: 4         |
|     |              |      |        | 276 - 292 | 664.72  | 39.4  | R.RTVNALEVELQAQH<br>NLR.D       | Deamidated: 11        |
|     |              |      |        | 346 - 356 | 676.32  | 65.2  | R.ARLESEINTYR.G                 |                       |
|     |              |      |        | 317 - 328 | 685.87  | 73.1  | L.IVNVESQLAEIR.S                |                       |
|     |              |      |        | 152 - 163 | 700.38  | 44    | R.QLVESDINGLRR.I                |                       |
|     |              |      |        | 229 - 240 | 725.87  | 43.2  | R.AQYEALVETNRR.D                | Deamidated: 10        |
|     |              |      |        | 75 - 86   | 737.89  | 37.2  | R.QLERENAELES.R.I               | Deamidated: 6         |
|     |              |      |        | 293 - 305 | 739.84  | 99.5  | R.DSLENTLTETEAR.Y               |                       |
|     |              |      |        | 293 - 305 | 740.32  | 87.9  | R.DSLENTLTETEAR.Y               | Deamidated: 5         |
|     |              |      |        | 334 - 345 | 752.9   | 100.1 | R.QNQEQVLLDVR.A                 |                       |
|     |              |      |        | 334 - 345 | 753.4   | 80.9  | R.QNQEQVLLDVR.A                 | Deamidated: 3         |
|     |              |      |        | 202 - 222 | 761.39  | 69.8  | R.SQLGDRLNVEVDAA<br>PTVDLNR.V   |                       |
|     |              |      |        | 208 - 222 | 813.38  | 91.9  | R.LNVEVDAAPTVDLN<br>R.V         |                       |
|     |              |      |        | 208 - 222 | 813.89  | 50.1  | R.LNVEVDAAPTVDLN<br>R.V         | Deamidated: 2         |
|     |              |      |        | 208 - 222 | 813.9   | 52.4  | R.LNVEVDAAPTVDLN<br>R.V         | Deamidated: 14        |
|     |              |      |        | 306 - 328 | 888.78  | 31.2  | R.YSCQLSQVQSLIVN<br>VESQLAEIR.S | Carbamidomethyl:<br>3 |
|     |              |      |        | 58 - 72   | 914.97  | 58.9  | E.TMQFLNDRLASYLE<br>K.V         |                       |
|     |              |      |        | 277 - 292 | 917.93  | 119.8 | R.TVNALEVELQAQHN<br>LR.D        |                       |
|     |              |      |        | 91 - 107  | 1072.52 | 69.8  | R.SQQQEPLVCPNYQ<br>SYFR.T       | Carbamidomethyl:<br>9 |
| K35 | gjl999000005 | 49.7 | 1066.7 | 107 - 113 | 412.24  | 44.1  | R.LASYLEK.V                     |                       |
|     |              |      |        | 167 - 175 | 500.33  | 75.6  | R.LVVQIDNAK.L                   |                       |
|     |              |      |        | 379 - 386 | 503.31  | 30.6  | E.YQVLLDVR.A                    |                       |
|     |              |      |        | 176 - 184 | 518.77  | 51.3  | K.LAADDFRTK.Y                   |                       |
|     |              |      |        | 101 - 113 | 532.99  | 35.7  | M.QFLNDRLASYLEK.V               |                       |
|     |              |      |        | 375 - 388 | 578     | 44.8  | R.QNQEQVLLDVRA<br>R.L           |                       |
|     |              |      |        | 389 - 397 | 585.81  | 52    | R.LECEISTYR.G                   | Carbamidomethyl:      |

|     |              |      |        |           |        |       |                              |                          |
|-----|--------------|------|--------|-----------|--------|-------|------------------------------|--------------------------|
|     |              |      |        |           |        |       |                              | 3                        |
|     |              |      |        | 183 - 192 | 637.28 | 34.3  | R.TKYETEVTMR.Q               | Oxidation: 9             |
|     |              |      |        | 387 - 397 | 699.34 | 42.3  | R.ARLECEISTYR.G              | Carbamidomethyl:<br>5    |
|     |              |      |        | 334 - 346 | 703.33 | 106.7 | R.DALESTLAETEAR.Y            |                          |
|     |              |      |        | 116 - 127 | 737.89 | 37.2  | R.QLERENAELESR.I             | Deamidated: 6            |
|     |              |      |        | 375 - 386 | 752.9  | 100.1 | R.QNQEQVLLDVR.A              |                          |
|     |              |      |        | 375 - 386 | 753.4  | 80.9  | R.QNQEQVLLDVR.A              | Deamidated: 3            |
|     |              |      |        | 249 - 263 | 811.43 | 53.2  | R.LNVEVDAAPPVDLN<br>R.V      |                          |
|     |              |      |        | 249 - 263 | 811.89 | 36.5  | R.LNVEVDAAPPVDLN<br>R.V      | Deamidated: 2            |
|     |              |      |        | 99 - 113  | 914.97 | 58.9  | E.TMQFLNDRLASYLE<br>K.V      |                          |
|     |              |      |        | 318 - 333 | 920.43 | 77.6  | R.TVNALEIELQAQHS<br>MR.D     |                          |
| K81 | gij999000007 | 55.1 | 2195.3 | 116 - 122 | 406.22 | 56.2  | R.FAAFIDK.V                  |                          |
|     |              |      |        | 39 - 47   | 426.25 | 57.8  | R.GLTGGFGSR.S                |                          |
|     |              |      |        | 125 - 131 | 453.7  | 36.2  | R.FLEQQNK.L                  |                          |
|     |              |      |        | 317 - 327 | 467.87 | 55.7  | R.RTKEEINELNR.V              |                          |
|     |              |      |        | 397 - 408 | 473.95 | 34.5  | K.LGLDIEIATYRR.L             |                          |
|     |              |      |        | 242 - 248 | 476.25 | 47.7  | R.LYEEEEIR.V                 |                          |
|     |              |      |        | 137 - 143 | 485.26 | 47    | K.LQFYQNR.Q                  | Deamidated: 6            |
|     |              |      |        | 409 - 416 | 487.24 | 67.5  | R.LLEGQEQR.L                 | Deamidated: 5            |
|     |              |      |        | 194 - 201 | 504.79 | 52.3  | R.YEEVALR.A                  |                          |
|     |              |      |        | 291 - 298 | 506.26 | 55.1  | R.AEAESWYR.S                 |                          |
|     |              |      |        | 280 - 288 | 519.77 | 33.7  | K.AQYDDIASR.S                |                          |
|     |              |      |        | 116 - 124 | 533.86 | 67    | R.FAAFIDKVR.F                |                          |
|     |              |      |        | 368 - 377 | 536.36 | 67.4  | K.LAGLEELQK.A                |                          |
|     |              |      |        | 154 - 162 | 543.34 | 67    | L.FSGYIETLR.R                |                          |
|     |              |      |        | 409 - 417 | 543.8  | 26.3  | R.LLEGQEQRL.C                | Deamidated: 5            |
|     |              |      |        | 241 - 248 | 554.31 | 49.8  | R.RLYEEEEIR.V                |                          |
|     |              |      |        | 24 - 32   | 556.26 | 67.9  | R.CCITAAPYR.G                | Carbamidomethyl:<br>1, 2 |
|     |              |      |        | 408 - 416 | 565.3  | 41.8  | R.RLLEGQEQR.L                | Deamidated: 6            |
|     |              |      |        | 214 - 222 | 570.28 | 26.4  | K.DVDCAYLRK.S                | Carbamidomethyl:<br>4    |
|     |              |      |        | 318 - 331 | 581.35 | 47.6  | R.TKEEINELNRVIQR.L           |                          |
|     |              |      |        | 202 - 212 | 596.81 | 74.9  | R.ATAENEFVALK.K              |                          |
|     |              |      |        | 164 - 174 | 597.71 | 68.3  | R.EAECAEADSGR.L              | Carbamidomethyl:<br>4    |
|     |              |      |        | 10 - 20   | 606.24 | 66    | R.AFSCVSACGPR.P              | Carbamidomethyl:<br>4, 8 |
|     |              |      |        | 318 - 327 | 623.32 | 49.7  | R.TKEEINELNR.V               |                          |
|     |              |      |        | 289 - 298 | 627.78 | 75.5  | R.SRAEAESWYR.S               |                          |
|     |              |      |        | 397 - 407 | 632.34 | 88    | K.LGLDIEIATYR.R              |                          |
|     |              |      |        | 323 - 327 | 645.35 | 27.1  | I.NELNR.V                    |                          |
|     |              |      |        | 202 - 213 | 660.85 | 62    | R.ATAENEFVALKK.D             |                          |
|     |              |      |        | 175 - 192 | 698.36 | 34.1  | R.LSSELNSLQEVLEG<br>YKKR.R   |                          |
|     |              |      |        | 433 - 446 | 711.79 | 78    | R.GGVVCGDLCVSGS<br>R.P       | Carbamidomethyl:<br>5, 9 |
|     |              |      |        | 125 - 136 | 745.91 | 55    | R.FLEQQNKLLET.K.L            |                          |
|     |              |      |        | 249 - 262 | 755.39 | 49    | R.VLQAHISDTSVIVK.<br>M       |                          |
|     |              |      |        | 221 - 240 | 783.05 | 67.6  | L.RKSDLEANVEALIQE<br>TDFLR.R |                          |

|         |              |      |        |           |        |       |                              |                                       |
|---------|--------------|------|--------|-----------|--------|-------|------------------------------|---------------------------------------|
|         |              |      |        | 417 - 432 | 855.35 | 131.8 | R.LCEGVGSVNVCVS<br>SSR.G     | Carbamidomethyl:<br>2, 11             |
| K86     | gij999000010 | 54.8 | 2211.1 | 133 - 139 | 406.22 | 56.2  | R.FAAFIDK.V                  |                                       |
|         |              |      |        | 142 - 148 | 453.7  | 36.2  | R.FLEQQNK.L                  |                                       |
|         |              |      |        | 333 - 343 | 467.87 | 55.7  | R.RTKEEINELNR.V              |                                       |
|         |              |      |        | 413 - 424 | 473.95 | 34.5  | K.LGLDIEIATYRR.L             |                                       |
|         |              |      |        | 258 - 264 | 476.25 | 47.7  | R.LYEEEEIR.V                 |                                       |
|         |              |      |        | 154 - 160 | 485.26 | 47    | K.LQFYQNR.Q                  | Deamidated: 6                         |
|         |              |      |        | 425 - 432 | 487.24 | 67.5  | R.LLEGEEQR.L                 |                                       |
|         |              |      |        | 7 - 15    | 490.26 | 49.1  | R.ISPGYSVTR.T                |                                       |
|         |              |      |        | 210 - 217 | 504.79 | 52.3  | R.YEEVEALR.A                 |                                       |
|         |              |      |        | 307 - 314 | 506.26 | 55.1  | R.AEAESWYR.S                 |                                       |
|         |              |      |        | 296 - 304 | 524.24 | 43.4  | K.AHYDDIASR.S                |                                       |
|         |              |      |        | 133 - 141 | 533.86 | 67    | R.FAAFIDKVR.F                |                                       |
|         |              |      |        | 384 - 393 | 536.36 | 67.4  | K.LAGLEELQK.A                |                                       |
|         |              |      |        | 171 - 179 | 543.34 | 67    | L.FSGYIETLR.R                |                                       |
|         |              |      |        | 425 - 433 | 543.8  | 26.3  | R.LLEGEEQRL.C                |                                       |
|         |              |      |        | 54 - 64   | 545.75 | 85.1  | R.SVSALGSCGPR.I              | Carbamidomethyl:<br>8                 |
|         |              |      |        | 31 - 39   | 549.21 | 48.2  | R.CCISAAPYR.G                | Carbamidomethyl:<br>1, 2              |
|         |              |      |        | 257 - 264 | 554.31 | 49.8  | R.RLYEEEEIR.V                |                                       |
|         |              |      |        | 424 - 432 | 565.3  | 41.8  | R.RLLEGEEQR.L                |                                       |
|         |              |      |        | 230 - 238 | 570.28 | 26.4  | K.DVDCAYLRK.S                | Carbamidomethyl:<br>4                 |
|         |              |      |        | 16 - 26   | 577.77 | 31.4  | R.TFSSCSAVAPK.T              | Carbamidomethyl:<br>5                 |
|         |              |      |        | 334 - 347 | 581.35 | 47.6  | R.TKEEINELNRVIQR.L           |                                       |
|         |              |      |        | 218 - 228 | 596.81 | 74.9  | R.ATAENEFVALK.K              |                                       |
|         |              |      |        | 181 - 191 | 597.71 | 68.3  | R.EAECAEADSGR.L              | Carbamidomethyl:<br>4                 |
|         |              |      |        | 334 - 343 | 623.32 | 49.7  | R.TKEEINELNR.V               |                                       |
|         |              |      |        | 305 - 314 | 627.78 | 75.5  | R.SRAEAESWYR.S               |                                       |
|         |              |      |        | 413 - 423 | 632.34 | 88    | K.LGLDIEIATYR.R              |                                       |
|         |              |      |        | 339 - 343 | 645.35 | 27.1  | I.NELNR.V                    |                                       |
|         |              |      |        | 218 - 229 | 660.85 | 62    | R.ATAENEFVALKK.D             |                                       |
|         |              |      |        | 382 - 393 | 680.39 | 86.6  | K.CKLAGLEELQK.A              | Carbamidomethyl:<br>1                 |
|         |              |      |        | 192 - 209 | 698.36 | 34.1  | R.LSSELNSLQEVLEG<br>YKKR.Y   |                                       |
|         |              |      |        | 142 - 153 | 745.91 | 55    | R.FLEQQNKLETK.L              |                                       |
|         |              |      |        | 265 - 278 | 755.39 | 49    | R.VLQAHISDTSVIVK.<br>M       |                                       |
|         |              |      |        | 237 - 256 | 783.05 | 67.6  | L.RKSDLEANVEALIQE<br>TDFLR.R |                                       |
|         |              |      |        | 433 - 448 | 847.39 | 132.1 | R.LCEGVGAVNVCVS<br>SSR.G     | Carbamidomethyl:<br>2, 11             |
| KAP13.1 | gij999000030 | 17.4 | 412.3  | 136 - 143 | 502.73 | 30    | R.SSFYRPTF.F                 |                                       |
|         |              |      |        | 136 - 144 | 576.31 | 49.6  | R.SSFYRPTFF.S                |                                       |
|         |              |      |        | 136 - 145 | 619.84 | 28    | R.SSFYRPTFFS.S               |                                       |
|         |              |      |        | 148 - 163 | 861.86 | 57    | R.SGQSLSFQPTCGS<br>GFY.-     | Carbamidomethyl:<br>11                |
|         |              |      |        | 148 - 163 | 862.35 | 58.7  | R.SGQSLSFQPTCGS<br>GFY.-     | Carbamidomethyl:<br>11; Deamidated: 3 |
|         |              |      |        | 20 - 36   | 934.38 | 112.7 | R.YSGSSCGSSFPSNL<br>VYR.T    | Carbamidomethyl:<br>6                 |
| KAP19.3 | gij999000016 | 7.6  | 368.4  | 59 - 65   | 405.66 | 55.8  | R.CPSSFGR.Y                  | Carbamidomethyl:<br>1                 |

|         |              |      |        |           |        |       |                            |                          |
|---------|--------------|------|--------|-----------|--------|-------|----------------------------|--------------------------|
|         |              |      |        | 13 - 24   | 572.81 | 44.7  | Y.GYGGFGGLGFR.G            |                          |
|         |              |      |        | 9 - 24    | 767.88 | 99.2  | S.GLGYGYGGFGGLG<br>FGR.G   |                          |
|         |              |      |        | 6 - 24    | 974.4  | 107.9 | N.YYSGLGYGYGGFG<br>GLGFR.G |                          |
| KAP19.6 | gij999000034 | 7.5  | 283.6  | 13 - 24   | 572.81 | 44.7  | Y.GYGGFGGLGFR.G            |                          |
|         |              |      |        | 9 - 24    | 767.88 | 99.2  | G.GLGYGYGGFGGLG<br>FGR.G   |                          |
|         |              |      |        | 8 - 24    | 796.37 | 93.1  | Y.GGLGYGYGGFGGL<br>GFGR.G  |                          |
| KAP6.1  | gij999000021 | 8.3  | 321.8  | 50 - 61   | 632.22 | 83.4  | R.SLCGSGYGYGSR.S           | Carbamidomethyl:<br>3    |
|         |              |      |        | 36 - 49   | 763.76 | 52.2  | R.LGCGYGCGYGYGS<br>R.S     | Carbamidomethyl:<br>3, 7 |
|         |              |      |        | 21 - 34   | 770.78 | 78.9  | G.LGCGYGSCYGSGF<br>R.R     | Carbamidomethyl:<br>3, 8 |
|         |              |      |        | 20 - 34   | 799.3  | 107.3 | G.GLGCYGYGSCYGS<br>FR.R    | Carbamidomethyl:<br>4, 9 |
| K10     | gij999000082 | 56.3 | 434.9  | 210 - 217 | 482.27 | 37.3  | A.RLAADDFR.M               |                          |
|         |              |      |        | 160 - 166 | 498.25 | 33.4  | K.IKEWYEK.H                |                          |
|         |              |      |        | 305 - 315 | 683.29 | 69.4  | R.SQYEQLAEKNR.R            |                          |
|         |              |      |        | 422 - 432 | 717.88 | 77.4  | K.IRLENEIQTYS              |                          |
|         |              |      |        | 202 - 217 | 915.97 | 42.3  | N.ILIQVDNARLAADD<br>F R.M  | Deamidated: 4            |
| K31     | gij164652864 | 46.8 | 2449.2 | 224 - 229 | 366.17 | 46.8  | R.VLNETR.A                 |                          |
|         |              |      |        | 217 - 223 | 407.71 | 32.9  | A.PTVDLNR.V                |                          |
|         |              |      |        | 67 - 73   | 412.24 | 44.1  | R.LASYLEK.V                |                          |
|         |              |      |        | 103 - 108 | 432.21 | 33.2  | N.YQSYFR.T                 |                          |
|         |              |      |        | 230 - 241 | 483.9  | 50.6  | R.AQYEALVETNRR.D           |                          |
|         |              |      |        | 127 - 135 | 500.33 | 75.6  | R.LVVQIDNAK.L              |                          |
|         |              |      |        | 339 - 346 | 503.31 | 30.6  | E.YQVLLDVR.A               |                          |
|         |              |      |        | 281 - 293 | 507.6  | 65.1  | N.ALEVELQAQHNLR.<br>D      |                          |
|         |              |      |        | 136 - 144 | 518.77 | 51.3  | K.LAADDFRTK.Y              |                          |
|         |              |      |        | 61 - 73   | 532.99 | 35.7  | M.QFLNDRLASYLEK.<br>V      |                          |
|         |              |      |        | 1 - 13    | 544.94 | 31.5  | -.MSFNFLPNLSFR.S           | Carbamidomethyl:<br>6    |
|         |              |      |        | 232 - 240 | 547.79 | 31.6  | Q.YEALVETNR.R              |                          |
|         |              |      |        | 242 - 249 | 555.31 | 53.7  | R.DVEEWYIR.Q               |                          |
|         |              |      |        | 108 - 116 | 572.81 | 29.4  | F.RTIEELQQK.I              |                          |
|         |              |      |        | 335 - 348 | 578    | 44.8  | R.QNQEYQVLLDVRA<br>R.L     |                          |
|         |              |      |        | 349 - 357 | 599.3  | 64.7  | R.LECEINTYR.G              | Carbamidomethyl:<br>3    |
|         |              |      |        | 143 - 152 | 605.35 | 65.6  | R.TKYETELGLR.Q             |                          |
|         |              |      |        | 153 - 163 | 622.87 | 48.1  | R.QLVESDINGLR.R            | Deamidated: 8            |
|         |              |      |        | 153 - 163 | 623.35 | 38.4  | R.QLVESDINGLR.R            | Deamidated: 1, 8         |
|         |              |      |        | 164 - 173 | 630.86 | 48.8  | R.RILDELTLCK.S             | Carbamidomethyl:<br>9    |
|         |              |      |        | 241 - 249 | 633.28 | 51    | R.RDVEEWYIR.Q              |                          |
|         |              |      |        | 230 - 240 | 647.33 | 90.4  | R.AQYEALVETNR.R            |                          |
|         |              |      |        | 277 - 293 | 664.7  | 60.2  | R.RTVNALEVELQAQ<br>HLR.D   | Deamidated: 4            |
|         |              |      |        | 277 - 293 | 664.72 | 39.4  | R.RTVNALEVELQAQ<br>HLR.D   | Deamidated: 11           |
|         |              |      |        | 153 - 164 | 700.38 | 44    | R.QLVESDINGLRR.I           |                          |
|         |              |      |        | 347 - 357 | 712.82 | 61.5  | R.ARLECEINTYR.G            | Carbamidomethyl:         |

|     |              |      |        |           |         |       |                               |                                         |
|-----|--------------|------|--------|-----------|---------|-------|-------------------------------|-----------------------------------------|
|     |              |      |        |           |         |       |                               | 5                                       |
|     |              |      |        | 230 - 241 | 725.87  | 43.2  | R.AQYEALVETNRR.D              | Deamidated: 10                          |
|     |              |      |        | 76 - 87   | 737.89  | 37.2  | R.QLERENAELESR.I              | Deamidated: 6                           |
|     |              |      |        | 294 - 306 | 739.84  | 99.5  | R.DSLENTLTETEAR.Y             |                                         |
|     |              |      |        | 294 - 306 | 740.32  | 87.9  | R.DSLENTLTETEAR.Y             | Deamidated: 5                           |
|     |              |      |        | 335 - 346 | 752.9   | 100.1 | R.QNQEYQVLLDVR.A              |                                         |
|     |              |      |        | 335 - 346 | 753.4   | 80.9  | R.QNQEYQVLLDVR.A              | Deamidated: 3                           |
|     |              |      |        | 203 - 223 | 761.39  | 69.8  | R.SQLGDRLNVEVDAA<br>PTVDLNR.V |                                         |
|     |              |      |        | 209 - 223 | 813.38  | 91.9  | R.LNVEVDAAPTVDLN<br>R.V       |                                         |
|     |              |      |        | 209 - 223 | 813.89  | 50.1  | R.LNVEVDAAPTVDLN<br>R.V       | Deamidated: 2                           |
|     |              |      |        | 209 - 223 | 813.9   | 52.4  | R.LNVEVDAAPTVDLN<br>R.V       | Deamidated: 14                          |
|     |              |      |        | 59 - 73   | 914.97  | 58.9  | E.TMQFLNDRLASYLE<br>K.V       |                                         |
|     |              |      |        | 278 - 293 | 917.93  | 119.8 | R.TVNALEVELQAQHN<br>LR.D      |                                         |
|     |              |      |        | 92 - 108  | 1072.52 | 69.8  | R.SQQQEPLVCPNYQ<br>SYFR.T     | Carbamidomethyl:<br>9                   |
| K34 | gjl309323371 | 46.6 | 2468.8 | 152 - 160 | 351.5   | 44.4  | K.LASDDFRTK.Y                 |                                         |
|     |              |      |        | 240 - 245 | 366.17  | 46.8  | R.VLNETR.A                    |                                         |
|     |              |      |        | 233 - 239 | 407.71  | 32.9  | A.PTVDLNR.V                   |                                         |
|     |              |      |        | 83 - 89   | 412.24  | 44.1  | R.LASYLEK.V                   |                                         |
|     |              |      |        | 119 - 124 | 432.21  | 33.2  | N.YQSYFR.T                    |                                         |
|     |              |      |        | 208 - 218 | 442.9   | 71.8  | K.KNHEEEANSLR.S               |                                         |
|     |              |      |        | 159 - 165 | 456.68  | 39    | R.TKYESER.S                   |                                         |
|     |              |      |        | 246 - 257 | 483.9   | 50.6  | R.AQYEALVETNRR.D              |                                         |
|     |              |      |        | 143 - 151 | 507.32  | 73.1  | R.LVIQIDNAK.L                 |                                         |
|     |              |      |        | 297 - 309 | 507.6   | 65.1  | N.ALEVELQAQHNL.R.<br>D        |                                         |
|     |              |      |        | 77 - 89   | 532.99  | 35.7  | M.QFLNDRLASYLEK.<br>V         |                                         |
|     |              |      |        | 248 - 256 | 547.79  | 31.6  | Q.YEALVETNR.R                 |                                         |
|     |              |      |        | 258 - 265 | 555.31  | 53.7  | R.DVEEWYIR.Q                  |                                         |
|     |              |      |        | 365 - 373 | 562.78  | 63.4  | R.LESEINTYR.G                 |                                         |
|     |              |      |        | 365 - 373 | 563.28  | 36.9  | R.LESEINTYR.G                 | Deamidated: 6                           |
|     |              |      |        | 124 - 132 | 572.81  | 29.4  | F.RTIEELQQK.I                 |                                         |
|     |              |      |        | 166 - 180 | 596.34  | 30.5  | R.SLRQLVESDINSLR<br>R.I       | Deamidated: 11<br>Carbamidomethyl:<br>9 |
|     |              |      |        | 180 - 189 | 630.86  | 48.8  | R.RILDELTLCK.S                |                                         |
|     |              |      |        | 257 - 265 | 633.28  | 51    | R.RDVEEWYIR.Q                 |                                         |
|     |              |      |        | 169 - 179 | 637.38  | 56.2  | R.QLVESDINSLR.R               |                                         |
|     |              |      |        | 169 - 179 | 637.86  | 42.9  | R.QLVESDINSLR.R               | Deamidated: 8                           |
|     |              |      |        | 246 - 256 | 647.33  | 90.4  | R.AQYEALVETNR.R               |                                         |
|     |              |      |        | 293 - 309 | 664.7   | 60.2  | R.RTVNALEVELQAQH<br>NLR.D     | Deamidated: 4                           |
|     |              |      |        | 293 - 309 | 664.72  | 39.4  | R.RTVNALEVELQAQH<br>NLR.D     | Deamidated: 11                          |
|     |              |      |        | 363 - 373 | 676.32  | 65.2  | K.ARLESEINTYR.G               |                                         |
|     |              |      |        | 246 - 257 | 725.87  | 43.2  | R.AQYEALVETNRR.D              | Deamidated: 10                          |
|     |              |      |        | 92 - 103  | 737.89  | 37.2  | R.QLERENAELESR.I              | Deamidated: 6                           |
|     |              |      |        | 310 - 322 | 739.84  | 99.5  | R.DSLENTLTETEAR.Y             |                                         |
|     |              |      |        | 310 - 322 | 740.32  | 87.9  | R.DSLENTLTETEAR.Y             | Deamidated: 5                           |
|     |              |      |        | 219 - 239 | 761.39  | 69.8  | R.SQLGDRLNVEVDAA<br>PTVDLNR.V |                                         |

|     |              |      |        |           |         |       |                           |                          |
|-----|--------------|------|--------|-----------|---------|-------|---------------------------|--------------------------|
|     |              |      |        | 138 - 151 | 793.87  | 53.4  | K.SENSRLVIQIDNAK.L        |                          |
|     |              |      |        | 225 - 239 | 813.38  | 91.9  | R.LNVEVDAAPTVDLN<br>R.V   |                          |
|     |              |      |        | 225 - 239 | 813.89  | 50.1  | R.LNVEVDAAPTVDLN<br>R.V   | Deamidated: 2            |
|     |              |      |        | 225 - 239 | 813.9   | 52.4  | R.LNVEVDAAPTVDLN<br>R.V   | Deamidated: 14           |
|     |              |      |        | 166 - 179 | 815.47  | 62.6  | R.SLRQLVESDINSLR.<br>R    |                          |
|     |              |      |        | 351 - 364 | 852.45  | 66.9  | R.QNQEYQVLLDVKA<br>R.L    |                          |
|     |              |      |        | 75 - 89   | 914.97  | 58.9  | E.TMQFLNDRILASYLE<br>K.V  |                          |
|     |              |      |        | 294 - 309 | 917.93  | 119.8 | R.TVNALEVELQAQHN<br>LR.D  |                          |
|     |              |      |        | 108 - 124 | 1079.52 | 83.8  | R.SQQQEPLLCPNYQ<br>SYFR.T | Carbamidomethyl:<br>9    |
| K6A | gij999000076 | 57.5 | 299.4  | 182 - 188 | 453.7   | 36.2  | R.FLEQQNK.V               |                          |
|     |              |      |        | 315 - 325 | 618.77  | 28.6  | D.TSVVLSMDNNR.N           | Deamidated: 10           |
|     |              |      |        | 326 - 337 | 665.42  | 63.4  | R.NLDLDSIIAEVK.A          |                          |
| K75 | gij999000081 | 58.8 | 397.5  | 164 - 170 | 453.7   | 36.2  | R.FLEQQNK.V               |                          |
|     |              |      |        | 242 - 252 | 596.81  | 74.9  | R.TAAENEFVALK.N           |                          |
|     |              |      |        | 297 - 307 | 618.77  | 28.6  | D.TSVVLSMDNNR.S           | Deamidated: 10           |
|     |              |      |        | 308 - 319 | 651.92  | 97.9  | R.SLDLDSIIAEVK.A          |                          |
| K83 | gij312283588 | 53.9 | 2528.1 | 122 - 128 | 406.22  | 56.2  | R.FAAFIDK.V               |                          |
|     |              |      |        | 45 - 53   | 426.25  | 57.8  | R.GLTGGFGSR.S             |                          |
|     |              |      |        | 220 - 226 | 441.72  | 48.2  | D.VDCAYVR.K               | Carbamidomethyl:<br>3    |
|     |              |      |        | 131 - 137 | 453.7   | 36.2  | R.FLEQQNK.L               |                          |
|     |              |      |        | 322 - 332 | 467.87  | 55.7  | R.RTKEEINELNR.V           |                          |
|     |              |      |        | 402 - 413 | 473.95  | 34.5  | K.LGLDIEIATYRR.L          |                          |
|     |              |      |        | 247 - 253 | 476.25  | 47.7  | R.LYEEEEIR.V              |                          |
|     |              |      |        | 414 - 421 | 487.24  | 67.5  | R.LLEGEEQR.L              |                          |
|     |              |      |        | 199 - 206 | 504.79  | 52.3  | K.YEEEEVALR.A             |                          |
|     |              |      |        | 296 - 303 | 506.26  | 55.1  | R.AEAESWYR.S              |                          |
|     |              |      |        | 285 - 293 | 519.77  | 33.7  | K.AQYDDIASR.S             |                          |
|     |              |      |        | 122 - 130 | 533.86  | 67    | R.FAAFIDKVR.F             |                          |
|     |              |      |        | 373 - 382 | 536.36  | 67.4  | K.LAGLEEALQK.A            |                          |
|     |              |      |        | 414 - 422 | 543.8   | 26.3  | R.LLEGEEQRL.C             |                          |
|     |              |      |        | 246 - 253 | 554.31  | 49.8  | R.RLYEEEEIR.V             |                          |
|     |              |      |        | 30 - 38   | 556.26  | 67.9  | R.CCITAAPYR.G             | Carbamidomethyl:<br>1, 2 |
|     |              |      |        | 413 - 421 | 565.3   | 41.8  | R.RLLEGEEQR.L             |                          |
|     |              |      |        | 198 - 206 | 568.79  | 60.4  | K.KYEEEEVALR.A            |                          |
|     |              |      |        | 4 - 15    | 579.78  | 58.2  | C.GFSTVGSGFGSR.A          |                          |
|     |              |      |        | 323 - 336 | 581.35  | 47.6  | R.TKEEINELNRVIQR.L        |                          |
|     |              |      |        | 207 - 217 | 596.81  | 74.9  | R.ATAENEFVALK.K           |                          |
|     |              |      |        | 16 - 26   | 606.24  | 66    | R.AFSCVSACGPR.P           | Carbamidomethyl:<br>4, 8 |
|     |              |      |        | 170 - 180 | 611.72  | 66.5  | R.EAECVEADSGR.L           | Carbamidomethyl:<br>4    |
|     |              |      |        | 323 - 332 | 623.32  | 49.7  | R.TKEEINELNR.V            |                          |
|     |              |      |        | 294 - 303 | 627.78  | 75.5  | R.SRAEAESWYR.S            |                          |
|     |              |      |        | 402 - 412 | 632.34  | 88    | K.LGLDIEIATYR.R           |                          |
|     |              |      |        | 328 - 332 | 645.35  | 27.1  | I.NELNR.V                 |                          |
|     |              |      |        | 207 - 218 | 660.85  | 62    | R.ATAENEFVALKK.D          |                          |
|     |              |      |        | 371 - 382 | 680.39  | 86.6  | R.CKLAGLEEALQK.A          | Carbamidomethyl:         |

|                            |              |       |       |                  |        |       |                                    |                                      |
|----------------------------|--------------|-------|-------|------------------|--------|-------|------------------------------------|--------------------------------------|
|                            |              |       |       |                  |        |       |                                    | 1                                    |
|                            |              |       |       | 2 - 15           | 710.3  | 92    | M.TCGFSTVGSFGFS<br>R.A             | Carbamidomethyl:<br>2                |
|                            |              |       |       | 438 - 451        | 711.79 | 78    | R.GGVVCGDLCVSGS<br>R.P             | Carbamidomethyl:<br>5, 9             |
|                            |              |       |       | 254 - 267        | 743.91 | 113.2 | R.VLQANISDTSVIVK.<br>M             |                                      |
|                            |              |       |       | 131 - 142        | 745.91 | 55    | R.FLEQQNKLLETK.L                   |                                      |
|                            |              |       |       | 349 - 370        | 776.76 | 33.9  | N.SKLEAAVTQAEQQ<br>GEVALNDAR.C     |                                      |
|                            |              |       |       | 349 - 370        | 777.05 | 35.5  | N.SKLEAAVTQAEQQ<br>GEVALNDAR.C     | Deamidated: 19                       |
|                            |              |       |       | 422 - 437        | 847.39 | 132.1 | R.LCEGVGAVNVCVS<br>SSR.G           | Carbamidomethyl:<br>2, 11            |
| KAP24.1                    | gij400531466 | 27.8  | 390.4 | 187 - 194        | 521.2  | 52.1  | R.YITNSCQR.Q                       | Carbamidomethyl:<br>6                |
|                            |              |       |       | 237 - 246        | 608.29 | 45.9  | R.YLYGGYRPLN.C                     |                                      |
|                            |              |       |       | 201 - 210        | 681.73 | 30.8  | R.NSQCPYDWHR.R                     | Carbamidomethyl:<br>4                |
|                            |              |       |       | 201 - 210        | 682.24 | 30.7  | R.NSQCPYDWHR.R                     | Carbamidomethyl:<br>4; Deamidated: 1 |
|                            |              |       |       | 224 - 236        | 694.38 | 80    | R.SLSSIPSSFPLR.Y                   |                                      |
|                            |              |       |       | 171 - 186        | 866.4  | 108   | R.SYQDLGFIPSGFSA<br>SR.Y           |                                      |
|                            |              |       |       | 221 - 236        | 903.45 | 43    | R.NFRSLSSIPSSFPL<br>R.Y            | Deamidated: 1                        |
| Plakophilin 3<br>Partial   | gij999000068 | 25.2  | 205.8 | 68 - 74          | 394.72 | 37.1  | R.WAGVLSR.L                        |                                      |
|                            |              |       |       | 82 - 89          | 477.32 | 64.4  | R.ILNPLDR.V                        |                                      |
|                            |              |       |       | 164 - 172        | 556.33 | 46    | R.DLLYFDGLR.K                      |                                      |
|                            |              |       |       | 138 - 163        | 876.19 | 41    | K.SPPADVLINIIAVLNN<br>LVVASPVAAR.D |                                      |
| PREDICTED:<br>desmoglein-4 | gij426253981 | 113.8 | 620.7 | 379 - 385        | 414.26 | 32.5  | R.IQVVNVR.E                        |                                      |
|                            |              |       |       | 379 - 385        | 414.74 | 30.6  | R.IQVVNVR.E                        | Deamidated: 5                        |
|                            |              |       |       | 225 - 232        | 460.25 | 25.4  | R.TTSNLLDR.E                       |                                      |
|                            |              |       |       | 448 - 455        | 469.27 | 72.1  | R.TGEIQFSR.E                       |                                      |
|                            |              |       |       | 386 - 400        | 559.93 | 26.2  | R.EGPAFHPNSMTFSV<br>R.E            | Deamidated: 8                        |
|                            |              |       |       | 1,037 -<br>1,045 | 570.26 | 44.1  | R.YSNIHYSQQ.-                      |                                      |
|                            |              |       |       | 139 - 149        | 663.83 | 25.2  | R.GEDLERPLELR.V                    |                                      |
|                            |              |       |       | 583 - 593        | 671.37 | 60.3  | R.ACELPQIIELR.A                    | Carbamidomethyl:<br>2                |
|                            |              |       |       | 1,019 -<br>1,031 | 675.8  | 68.5  | R.ISQTSSTSPVTSR.H                  |                                      |
|                            |              |       |       | 92 - 110         | 677.35 | 70.9  | R.ISGAGIDRPPYGVFT<br>INPR.T        |                                      |
|                            |              |       |       | 123 - 133        | 712.89 | 49.5  | R.EITPLFLIYCR.A                    | Carbamidomethyl:<br>10               |
|                            |              |       |       | 116 - 133        | 732.42 | 32.8  | N.ITSVVDREITPLFLIY<br>CR.A         | Carbamidomethyl:<br>17               |
| PREDICTED:<br>desmoglein   | gij426251400 | 331   | 664.3 | 2,570 -<br>2,575 | 350.71 | 36.7  | R.VVLVDR.K                         |                                      |
|                            |              |       |       | 1,229 -<br>1,237 | 507.82 | 38.8  | R.VLLQEEGAR.K                      |                                      |
|                            |              |       |       | 2,705 -<br>2,714 | 516.31 | 59.9  | R.GIVDSISGQR.L                     |                                      |



|                                       |              |      |       |               |         |       |                                  |                                            |
|---------------------------------------|--------------|------|-------|---------------|---------|-------|----------------------------------|--------------------------------------------|
|                                       |              |      |       | 1,807 - 1,815 | 530.78  | 41.7  | R.SQLQISNNR.T                    | Deamidated: 7                              |
|                                       |              |      |       | 195 - 203     | 579.85  | 52.7  | R.LLQLQEQMR.A                    |                                            |
|                                       |              |      |       | 324 - 334     | 636.35  | 75.9  | R.QLQNIQATSR.E                   |                                            |
|                                       |              |      |       | 2,791 - 2,809 | 1084.52 | 57.1  | R.FLEFQYLTGGLVDP<br>EVQGR.I      |                                            |
| PREDICTED:<br>junction<br>plakoglobin | gij426238025 | 81.7 | 657   | 541 - 555     | 533.89  | 48.6  | R.HVAAGTQQPYTDG<br>VR.M          |                                            |
|                                       |              |      |       | 368 - 377     | 651.87  | 62.5  | R.LVQNCLWTLR.N                   | Carbamidomethyl:<br>5                      |
|                                       |              |      |       | 368 - 377     | 652.35  | 32.2  | R.LVQNCLWTLR.N                   | Carbamidomethyl:<br>5; Deamidated: 4       |
|                                       |              |      |       | 178 - 191     | 706.41  | 107.6 | R.ALMGSPQLVAAVVR<br>.T           |                                            |
|                                       |              |      |       | 178 - 191     | 714.39  | 94.6  | R.ALMGSPQLVAAVVR<br>.T           | Oxidation: 3                               |
|                                       |              |      |       | 507 - 526     | 719.71  | 29.8  | R.NLALCPANHAPLQE<br>AAVIPR.L     | Carbamidomethyl:<br>5; Deamidated: 1,<br>8 |
|                                       |              |      |       | 638 - 651     | 742.37  | 96.8  | R.NEGTATYAAAVLFR.<br>I           |                                            |
|                                       |              |      |       | 638 - 651     | 742.88  | 43    | R.NEGTATYAAAVLFR.<br>I           | Deamidated: 1                              |
| PREDICTED:<br>KAP13.1-<br>like        | gij426219157 | 19.6 | 267.3 | 128 - 137     | 551.69  | 52.4  | R.SCYSVGCGR.G                    | Carbamidomethyl:<br>2, 7                   |
|                                       |              |      |       | 142 - 160     | 1017.41 | 87.9  | R.LGYGICGFPVLSSG<br>SGFCR.P      | Carbamidomethyl:<br>6, 18                  |
|                                       |              |      |       | 97 - 115      | 1054.45 | 99.4  | R.TSTFSSPCQTTFFG<br>SLAYR.S      | Carbamidomethyl:<br>8                      |
| PREDICTED:<br>KAP16.1-<br>like        | gij426239028 | 82.3 | 241.2 | 704 - 710     | 448.29  | 36.4  | R.PFYSILR.R                      |                                            |
|                                       |              |      |       | 699 - 710     | 514.97  | 30.6  | R.PACYRPFYSILR.R                 | Carbamidomethyl:<br>3                      |
|                                       |              |      |       | 27 - 36       | 566.78  | 29.9  | R.GPVCLPSSCR.S                   | Carbamidomethyl:<br>4, 9                   |
|                                       |              |      |       | 689 - 698     | 614.34  | 46.9  | R.QPYLTSISYR.P                   |                                            |
|                                       |              |      |       | 555 - 565     | 666.35  | 45.8  | R.VSLVCEPICVR.P                  | Carbamidomethyl:<br>5, 9                   |
| PREDICTED:<br>K32                     | gij426238005 | 46   | 675.5 | 239 - 246     | 541.28  | 53.5  | R.DVEEFTR.Q                      |                                            |
|                                       |              |      |       | 229 - 237     | 547.79  | 31.6  | R.YEALVETNR.R                    |                                            |
|                                       |              |      |       | 346 - 354     | 554.8   | 56.2  | R.LEAEINTYR.G                    |                                            |
|                                       |              |      |       | 140 - 149     | 598.29  | 56.6  | R.SKYETELGLR.Q                   |                                            |
|                                       |              |      |       | 161 - 170     | 630.86  | 48.8  | R.RILDELTLCK.A                   | Carbamidomethyl:<br>9                      |
|                                       |              |      |       | 344 - 354     | 668.34  | 63.1  | R.ARLEAEINTYR.G                  |                                            |
|                                       |              |      |       | 291 - 303     | 739.84  | 99.5  | R.DSLENTLTETEAR.Y                |                                            |
|                                       |              |      |       | 291 - 303     | 740.32  | 87.9  | R.DSLENTLTETEAR.Y                | Deamidated: 5                              |
|                                       |              |      |       | 303 - 326     | 907.8   | 28    | A.RYASQLAQMGGLV<br>TNVESQLAEIR.C | Oxidation: 9                               |
| PREDICTED:<br>K36                     | gij426238007 | 51.3 | 603.7 | 104 - 110     | 412.24  | 44.1  | R.LASYLEK.V                      |                                            |
|                                       |              |      |       | 164 - 172     | 507.32  | 73.1  | R.LVLQIDNAK.L                    |                                            |
|                                       |              |      |       | 173 - 181     | 518.77  | 51.3  | K.LAADDFRK.Y                     |                                            |

|                 |              |      |       |           |        |      |                            |                             |
|-----------------|--------------|------|-------|-----------|--------|------|----------------------------|-----------------------------|
|                 |              |      |       | 98 - 110  | 532.99 | 35.7 | M.QFLNDRLASYLEK.V          |                             |
|                 |              |      |       | 201 - 210 | 630.86 | 48.8 | R.RILDELTLCK.A             | Carbamidomethyl: 9          |
|                 |              |      |       | 39 - 53   | 673.33 | 50.4 | R.GPSLAGVSGSASSI R.L       |                             |
|                 |              |      |       | 113 - 124 | 737.89 | 37.2 | R.QLERENAELESR.I           | Deamidated: 6               |
|                 |              |      |       | 372 - 385 | 852.45 | 66.9 | R.QNQEQVLLDVKA R.L         |                             |
|                 |              |      |       | 96 - 110  | 914.97 | 58.9 | E.TMQFLNDRLASYLE K.V       |                             |
| PREDIC TED: K20 | gij426237957 | 48.3 | 203.7 | 81 - 89   | 553.82 | 65.6 | R.LASYLERVR.S              |                             |
|                 |              |      |       | 329 - 348 | 782.77 | 25.3 | I.QAQLNLLLEGQLVQV RMDTER.Q | Deamidated: 1, 3, 5, 10, 13 |
| PREDIC TED: K82 | gij426224444 | 56.7 | 978.2 | 138 - 144 | 453.7  | 36.2 | R.FLEQKNK.L                |                             |
|                 |              |      |       | 409 - 420 | 473.95 | 34.5 | K.LGLDIEIATYRR.L           |                             |
|                 |              |      |       | 27 - 39   | 482.54 | 52.2 | R.VVTHYAASQGPCR.T          | Carbamidomethyl: 12         |
|                 |              |      |       | 421 - 428 | 487.24 | 67.5 | R.LLEGEEQR.L               |                             |
|                 |              |      |       | 71 - 79   | 513.77 | 37.8 | R.CGLPGFGYR.A              | Carbamidomethyl: 1          |
|                 |              |      |       | 380 - 389 | 536.36 | 67.4 | K.LAGLEELQK.A              |                             |
|                 |              |      |       | 421 - 429 | 543.8  | 26.3 | R.LLEGEEQRL.C              |                             |
|                 |              |      |       | 420 - 428 | 565.3  | 41.8 | R.RLLEGEEQR.L              |                             |
|                 |              |      |       | 16 - 26   | 605.8  | 75.2 | R.SFSSCSAVLPR.V            | Carbamidomethyl: 5          |
|                 |              |      |       | 409 - 419 | 632.34 | 88   | K.LGLDIEIATYR.R            |                             |
|                 |              |      |       | 378 - 389 | 680.39 | 86.6 | K.CKLAGLEELQK.A            | Carbamidomethyl: 1          |
|                 |              |      |       | 138 - 149 | 745.91 | 55   | R.FLEQKNKLETK.W            |                             |
|                 |              |      |       | 48 - 64   | 910.44 | 96.3 | R.ALGCLGSWSLCNV GLGR.P     | Carbamidomethyl: 4, 11      |
| PREDIC TED: K84 | gij426224440 | 64.1 | 799.2 | 177 - 183 | 453.7  | 36.2 | R.FLEQQNK.L                |                             |
|                 |              |      |       | 371 - 378 | 501.78 | 50.1 | R.DEINELNR.L               |                             |
|                 |              |      |       | 54 - 64   | 598.79 | 71.6 | R.SVISFGSCSPR.I            | Carbamidomethyl: 8          |
|                 |              |      |       | 357 - 367 | 635.73 | 56.7 | R.VTAGQHCDNLR.N            | Carbamidomethyl: 7          |
|                 |              |      |       | 448 - 458 | 639.39 | 53.8 | K.LALDIEIATYR.R            |                             |
|                 |              |      |       | 374 - 378 | 645.35 | 27.1 | I.NELNR.L                  |                             |
|                 |              |      |       | 368 - 378 | 687.35 | 33.9 | R.NTRDEINELNR.L            |                             |
|                 |              |      |       | 502 - 516 | 710.86 | 96.6 | R.GGVTVSGISSSSNI R.S       |                             |
|                 |              |      |       | 177 - 188 | 745.91 | 55   | R.FLEQQNKLETK.W            |                             |
|                 |              |      |       | 103 - 117 | 827.85 | 94.7 | R.SGLSYGFCSPGFG YR.V       | Carbamidomethyl: 8          |
| PREDIC TED: K85 | gij426226634 | 56.3 | 673   | 149 - 155 | 406.22 | 56.2 | R.FAAFIDK.V                |                             |
|                 |              |      |       | 158 - 164 | 453.7  | 36.2 | R.FLEQQNK.L                |                             |
|                 |              |      |       | 349 - 359 | 467.87 | 55.7 | R.RTKEEINELNR.V            |                             |
|                 |              |      |       | 72 - 80   | 473.74 | 38.9 | R.SLCAVGSPR.I              | Carbamidomethyl: 3          |
|                 |              |      |       | 170 - 176 | 485.26 | 47   | K.LQFYQNR.Q                | Deamidated: 6               |
|                 |              |      |       | 149 - 157 | 533.86 | 67   | R.FAAFIDKVR.F              |                             |

|                                     |              |      |        |           |        |       |                           |                       |
|-------------------------------------|--------------|------|--------|-----------|--------|-------|---------------------------|-----------------------|
|                                     |              |      |        | 350 - 363 | 581.35 | 47.6  | R.TKEEINELNRVIQR.L        |                       |
|                                     |              |      |        | 81 - 90   | 596.35 | 60.8  | R.ISVSYAWPLR.G            |                       |
|                                     |              |      |        | 350 - 359 | 623.32 | 49.7  | R.TKEEINELNR.V            |                       |
|                                     |              |      |        | 355 - 359 | 645.35 | 27.1  | I.NELNR.V                 |                       |
|                                     |              |      |        | 45 - 58   | 694.82 | 55.3  | R.GFANGLAFHGGSP<br>R.G    | Deamidated: 4         |
|                                     |              |      |        | 158 - 169 | 745.91 | 55    | R.FLEQQNKLETK.L           |                       |
| PREDIC<br>TED:<br>K1b               | gij426224420 | 60.9 | 289    | 192 - 198 | 453.7  | 36.2  | R.FLEQQNQ.V               |                       |
|                                     |              |      |        | 369 - 378 | 590.3  | 54.4  | K.YQELQITAGR.H            | Deamidated: 2         |
|                                     |              |      |        | 192 - 203 | 738.37 | 62.1  | R.FLEQQNQVLQTK.W          |                       |
| PREDIC<br>TED:<br>plakophili<br>n-3 | gij426252688 | 76.9 | 306.6  | 139 - 144 | 378.7  | 32    | X.AFAYER.R                |                       |
|                                     |              |      |        | 559 - 565 | 394.72 | 37.1  | R.WAGVLSR.L               |                       |
|                                     |              |      |        | 573 - 580 | 477.32 | 64.4  | R.ILNPLDR.V               |                       |
|                                     |              |      |        | 409 - 418 | 517.77 | 61.9  | R.NLSSASQATR.Q            |                       |
|                                     |              |      |        | 189 - 204 | 710.86 | 57.8  | R.GVAGGGPGGIPEP<br>VTR.A  |                       |
| K33a                                | gij125091    | 46   | 2188.4 | 136 - 144 | 351.5  | 44.4  | K.LASDDFRTK.Y             |                       |
|                                     |              |      |        | 224 - 229 | 366.17 | 46.8  | H.VLNETR.A                |                       |
|                                     |              |      |        | 67 - 73   | 412.24 | 44.1  | R.LASYLEK.V               |                       |
|                                     |              |      |        | 103 - 108 | 432.21 | 33.2  | N.YQSYFR.T                |                       |
|                                     |              |      |        | 230 - 241 | 483.9  | 50.6  | R.AQYEALVETNRR.D          |                       |
|                                     |              |      |        | 127 - 135 | 500.33 | 75.6  | R.LVVQIDNAK.L             |                       |
|                                     |              |      |        | 339 - 346 | 503.31 | 30.6  | E.YQVLLDVR.A              |                       |
|                                     |              |      |        | 281 - 293 | 507.6  | 65.1  | N.ALEVELQAQHNL.R.<br>D    |                       |
|                                     |              |      |        | 61 - 73   | 532.99 | 35.7  | M.QFLNDRLASYLEK.<br>V     |                       |
|                                     |              |      |        | 1 - 13    | 544.94 | 31.5  | -.MSFNFCPLNLSFR.S         | Carbamidomethyl:<br>6 |
|                                     |              |      |        | 232 - 240 | 547.79 | 31.6  | Q.YEALVETNR.R             |                       |
|                                     |              |      |        | 242 - 249 | 555.31 | 53.7  | R.DVEEWYIR.Q              |                       |
|                                     |              |      |        | 108 - 116 | 572.81 | 29.4  | F.RTIEELQQK.I             |                       |
|                                     |              |      |        | 335 - 348 | 578    | 44.8  | R.QNQEYQVLLDVRA<br>R.L    |                       |
|                                     |              |      |        | 349 - 357 | 599.3  | 64.7  | R.LECEINTYR.G             | Carbamidomethyl:<br>3 |
|                                     |              |      |        | 143 - 152 | 613.31 | 70.7  | R.TKYETEVSRLR.Q           |                       |
|                                     |              |      |        | 153 - 163 | 614.39 | 65.1  | R.QLVEADLNGLR.R           |                       |
|                                     |              |      |        | 164 - 173 | 630.86 | 48.8  | R.RILDELTLCK.S            | Carbamidomethyl:<br>9 |
|                                     |              |      |        | 241 - 249 | 633.28 | 51    | R.RDVEEWYIR.Q             |                       |
|                                     |              |      |        | 230 - 240 | 647.33 | 90.4  | R.AQYEALVETNR.R           |                       |
|                                     |              |      |        | 277 - 293 | 664.7  | 60.2  | R.RTVNALEVELQAQH<br>NLR.D | Deamidated: 4         |
|                                     |              |      |        | 277 - 293 | 664.72 | 39.4  | R.RTVNALEVELQAQH<br>NLR.D | Deamidated: 11        |
|                                     |              |      |        | 153 - 164 | 692.39 | 30.4  | R.QLVEADLNGLRR.I          |                       |
|                                     |              |      |        | 347 - 357 | 712.82 | 61.5  | R.ARLECEINTYR.G           | Carbamidomethyl:<br>5 |
|                                     |              |      |        | 230 - 241 | 725.87 | 43.2  | R.AQYEALVETNRR.D          | Deamidated: 10        |
|                                     |              |      |        | 294 - 306 | 739.84 | 99.5  | R.DSLENTLTETEAR.Y         |                       |
|                                     |              |      |        | 294 - 306 | 740.32 | 87.9  | R.DSLENTLTETEAR.Y         | Deamidated: 5         |
|                                     |              |      |        | 335 - 346 | 752.9  | 100.1 | R.QNQEYQVLLDVR.A          |                       |

|     |           |      |        |           |         |       |                                  |                                       |
|-----|-----------|------|--------|-----------|---------|-------|----------------------------------|---------------------------------------|
|     |           |      |        | 335 - 346 | 753.4   | 80.9  | R.QNQEYQVLLDVR.A                 | Deamidated: 3                         |
|     |           |      |        | 215 - 229 | 825.42  | 103.6 | D.AAPTVDLNHVLNET<br>R.A          |                                       |
|     |           |      |        | 307 - 329 | 888.78  | 31.2  | R.YSCQLNQVQSLIVS<br>VESQLAEIR.S  | Carbamidomethyl:<br>3                 |
|     |           |      |        | 59 - 73   | 914.97  | 58.9  | E.TMQFLNDRLASYLE<br>K.V          |                                       |
|     |           |      |        | 278 - 293 | 917.93  | 119.8 | R.TVNALEVELQAQHN<br>LR.D         |                                       |
|     |           |      |        | 92 - 108  | 1072.52 | 69.8  | R.SQQQEPLVCPNYQ<br>SYFR.T        | Carbamidomethyl:<br>9                 |
| K85 | gij246276 | 56.3 | 2037.6 | 133 - 139 | 406.22  | 56.2  | R.FAAFIDK.V                      |                                       |
|     |           |      |        | 142 - 148 | 453.7   | 36.2  | R.FLEQQNK.L                      |                                       |
|     |           |      |        | 333 - 343 | 467.87  | 55.7  | R.RTKEEINELNR.V                  |                                       |
|     |           |      |        | 413 - 424 | 473.95  | 34.5  | K.LGLDIEIATYRR.L                 |                                       |
|     |           |      |        | 425 - 432 | 487.24  | 67.5  | R.LLEGEEQR.L                     |                                       |
|     |           |      |        | 7 - 15    | 490.26  | 49.1  | R.ISPGYSVTR.T                    |                                       |
|     |           |      |        | 210 - 217 | 504.79  | 52.3  | K.YEEEVALR.A                     |                                       |
|     |           |      |        | 307 - 314 | 506.26  | 55.1  | R.AEAESWYR.S                     |                                       |
|     |           |      |        | 296 - 304 | 519.77  | 33.7  | K.AQYDDIASR.S                    |                                       |
|     |           |      |        | 489 - 498 | 523.17  | 36.9  | R.ASSFSCGSSR.S                   | Carbamidomethyl:<br>6                 |
|     |           |      |        | 133 - 141 | 533.86  | 67    | R.FAAFIDKVR.F                    |                                       |
|     |           |      |        | 384 - 393 | 536.36  | 67.4  | K.LAGLEELQK.A                    |                                       |
|     |           |      |        | 425 - 433 | 543.8   | 26.3  | R.LLEGEEQRL.C                    |                                       |
|     |           |      |        | 54 - 64   | 545.75  | 85.1  | R.SVSALGSCGPR.I                  | Carbamidomethyl:<br>8                 |
|     |           |      |        | 31 - 39   | 549.21  | 48.2  | R.CCISAAPYR.G                    | Carbamidomethyl:<br>1, 2              |
|     |           |      |        | 424 - 432 | 565.3   | 41.8  | R.RLLEGEEQR.L                    |                                       |
|     |           |      |        | 209 - 217 | 568.79  | 60.4  | K.KYEEEVALR.A                    |                                       |
|     |           |      |        | 230 - 238 | 570.28  | 26.4  | K.DVDCAYLRK.S                    | Carbamidomethyl:<br>4                 |
|     |           |      |        | 16 - 26   | 577.77  | 31.4  | R.TFSSCSAVAPK.T                  | Carbamidomethyl:<br>5                 |
|     |           |      |        | 334 - 347 | 581.35  | 47.6  | R.TKEEINELNRVIQR.L               |                                       |
|     |           |      |        | 181 - 191 | 600.23  | 31.5  | R.EAEHVEADSGR.L                  |                                       |
|     |           |      |        | 334 - 343 | 623.32  | 49.7  | R.TKEEINELNR.V                   |                                       |
|     |           |      |        | 305 - 314 | 627.78  | 75.5  | R.SRAEAESWYR.S                   |                                       |
|     |           |      |        | 413 - 423 | 632.34  | 88    | K.LGLDIEIATYR.R                  |                                       |
|     |           |      |        | 382 - 393 | 643.88  | 106   | R.SKLAGLEELQK.A                  |                                       |
|     |           |      |        | 339 - 343 | 645.35  | 27.1  | I.NELNR.V                        |                                       |
|     |           |      |        | 142 - 153 | 745.91  | 55    | R.FLEQQNKLLETK.W                 |                                       |
|     |           |      |        | 449 - 464 | 757.32  | 98    | R.GGVACGGLTYSST<br>AGR.Q         | Carbamidomethyl:<br>5                 |
|     |           |      |        | 465 - 488 | 794.71  | 79.9  | R.QIASGPVATGGSITV<br>LAPDSCQPR.A | Carbamidomethyl:<br>21                |
|     |           |      |        | 433 - 448 | 855.35  | 131.8 | R.LCEGVGSVNVCVS<br>SSR.G         | Carbamidomethyl:<br>2, 11             |
|     |           |      |        | 465 - 488 | 1192.07 | 63.6  | R.QIASGPVATGGSITV<br>LAPDSCQPR.A | Carbamidomethyl:<br>21; Deamidated: 1 |
